# Supplementary material for: Comparative genomics and evolution of regulons of the LacI-family transcription factors
Source: Front Microbiol. 2014 Jun 11;5:294. doi: 10.3389/fmicb.2014.00294 (PMC4052901; doi:10.3389/fmicb.2014.00294)
Supplement: Supplementary file 1 [file DataSheet1.XLS]

## Sheet: Genomes
Additional file 1. Studied bacterial genomes, LacI-TF regulogs and regulators.
Phylum	Class	Taxonomic collection 1	Genome	Number LacI-TF*	Average LacI-TFs
Actinobacteria	Actinobacteria	Bifidobacteriaceae	Bifidobacterium adolescentis ATCC 15703	18	17.2222
Actinobacteria	Actinobacteria	Bifidobacteriaceae	Bifidobacterium angulatum DSM 20098	15
Actinobacteria	Actinobacteria	Bifidobacteriaceae	Bifidobacterium animalis subsp. lactis AD011	11
Actinobacteria	Actinobacteria	Bifidobacteriaceae	Bifidobacterium bifidum NCIMB 41171	13
Actinobacteria	Actinobacteria	Bifidobacteriaceae	Bifidobacterium breve DSM 20213	25
Actinobacteria	Actinobacteria	Bifidobacteriaceae	Bifidobacterium dentium Bd1	31
Actinobacteria	Actinobacteria	Bifidobacteriaceae	Bifidobacterium gallicum DSM 20093	15
Actinobacteria	Actinobacteria	Bifidobacteriaceae	Bifidobacterium longum NCC2705	21
Actinobacteria	Actinobacteria	Bifidobacteriaceae	Gardnerella vaginalis 409-05	6
Actinobacteria	Actinobacteria	Corynebacteriaceae	Corynebacterium amycolatum SK46	1	2.5
Actinobacteria	Actinobacteria	Corynebacteriaceae	Corynebacterium aurimucosum ATCC 700975	1
Actinobacteria	Actinobacteria	Corynebacteriaceae	Corynebacterium diphtheriae NCTC 13129	2
Actinobacteria	Actinobacteria	Corynebacteriaceae	Corynebacterium efficiens YS-314	5
Actinobacteria	Actinobacteria	Corynebacteriaceae	Corynebacterium glutamicum ATCC 13032	8
Actinobacteria	Actinobacteria	Corynebacteriaceae	Corynebacterium jeikeium K411	1
Actinobacteria	Actinobacteria	Corynebacteriaceae	Corynebacterium kroppenstedtii DSM 44385	1
Actinobacteria	Actinobacteria	Corynebacteriaceae	Corynebacterium urealyticum DSM 7109	1
Actinobacteria	Actinobacteria	Frankineae/Propionibacterineae/Pseudonocardiaceae	Acidothermus cellulolyticus 11B	7	14.2222
Actinobacteria	Actinobacteria	Frankineae/Propionibacterineae/Pseudonocardiaceae	Actinosynnema mirum DSM 43827	33
Actinobacteria	Actinobacteria	Frankineae/Propionibacterineae/Pseudonocardiaceae	Frankia sp. CcI3	2
Actinobacteria	Actinobacteria	Frankineae/Propionibacterineae/Pseudonocardiaceae	Frankia sp. EAN1pec	16
Actinobacteria	Actinobacteria	Frankineae/Propionibacterineae/Pseudonocardiaceae	Nakamurella multipartita DSM 44233	22
Actinobacteria	Actinobacteria	Frankineae/Propionibacterineae/Pseudonocardiaceae	Nocardioides sp. JS614	8
Actinobacteria	Actinobacteria	Frankineae/Propionibacterineae/Pseudonocardiaceae	Propionibacterium acnes KPA171202	10
Actinobacteria	Actinobacteria	Frankineae/Propionibacterineae/Pseudonocardiaceae	Saccharomonospora viridis DSM 43017	6
Actinobacteria	Actinobacteria	Frankineae/Propionibacterineae/Pseudonocardiaceae	Saccharopolyspora erythraea NRRL 2338	24
Actinobacteria	Actinobacteria	Micrococcineae	Arthrobacter aurescens TC1	32	15.7857
Actinobacteria	Actinobacteria	Micrococcineae	Arthrobacter chlorophenolicus A6	27
Actinobacteria	Actinobacteria	Micrococcineae	Arthrobacter sp. FB24	30
Actinobacteria	Actinobacteria	Micrococcineae	Beutenbergia cavernae DSM 12333	45
Actinobacteria	Actinobacteria	Micrococcineae	Brachybacterium faecium DSM 4810	30
Actinobacteria	Actinobacteria	Micrococcineae	Brevibacterium linens BL2	0
Actinobacteria	Actinobacteria	Micrococcineae	Clavibacter michiganensis subsp. michiganensis NCPPB 382	20
Actinobacteria	Actinobacteria	Micrococcineae	Janibacter sp. HTCC2649	5
Actinobacteria	Actinobacteria	Micrococcineae	Jonesia denitrificans DSM 20603	18
Actinobacteria	Actinobacteria	Micrococcineae	Kocuria rhizophila DC2201	1
Actinobacteria	Actinobacteria	Micrococcineae	Kytococcus sedentarius DSM 20547	1
Actinobacteria	Actinobacteria	Micrococcineae	Leifsonia xyli subsp. xyli str. CTCB07	4
Actinobacteria	Actinobacteria	Micrococcineae	Renibacterium salmoninarum ATCC 33209	8
Actinobacteria	Actinobacteria	Micrococcineae	Tropheryma whipplei str. Twist	0
Actinobacteria	Actinobacteria	Mycobacteriaceae	Mycobacterium abscessus ATCC 19977	1	3.11111
Actinobacteria	Actinobacteria	Mycobacteriaceae	Mycobacterium avium 104	2
Actinobacteria	Actinobacteria	Mycobacteriaceae	Mycobacterium flavescens PYR-GCK	1
Actinobacteria	Actinobacteria	Mycobacteriaceae	Mycobacterium leprae TN	0
Actinobacteria	Actinobacteria	Mycobacteriaceae	Mycobacterium marinum M	1
Actinobacteria	Actinobacteria	Mycobacteriaceae	Mycobacterium smegmatis str. MC2 155	15
Actinobacteria	Actinobacteria	Mycobacteriaceae	Mycobacterium sp. JLS	3
Actinobacteria	Actinobacteria	Mycobacteriaceae	Mycobacterium tuberculosis H37Rv	1
Actinobacteria	Actinobacteria	Mycobacteriaceae	Mycobacterium vanbaalenii PYR-1	4
Actinobacteria	Actinobacteria	Nocardiaceae	Nocardia farcinica IFM 10152	4	11.5
Actinobacteria	Actinobacteria	Nocardiaceae	Rhodococcus erythropolis PR4	6
Actinobacteria	Actinobacteria	Nocardiaceae	Rhodococcus opacus B4	21
Actinobacteria	Actinobacteria	Nocardiaceae	Rhodococcus sp. RHA1	15
Actinobacteria	Actinobacteria	Streptomycetaceae	Streptomyces avermitilis MA-4680	27	32.25
Actinobacteria	Actinobacteria	Streptomycetaceae	Streptomyces coelicolor A3(2)	35
Actinobacteria	Actinobacteria	Streptomycetaceae	Streptomyces griseus subsp. griseus NBRC 13350	22
Actinobacteria	Actinobacteria	Streptomycetaceae	Streptomyces scabiei 87.22	45		530
Bacteroidetes	Bacteroidia	Bacteroidaceae	Bacteroides cellulosilyticus DSM 14838	6	3
Bacteroidetes	Bacteroidia	Bacteroidaceae	Bacteroides coprophilus DSM 18228	1
Bacteroidetes	Bacteroidia	Bacteroidaceae	Bacteroides dorei DSM 17855	2
Bacteroidetes	Bacteroidia	Bacteroidaceae	Bacteroides eggerthii DSM 20697	5
Bacteroidetes	Bacteroidia	Bacteroidaceae	Bacteroides fragilis NCTC 9343	2
Bacteroidetes	Bacteroidia	Bacteroidaceae	Bacteroides ovatus ATCC 8483	5
Bacteroidetes	Bacteroidia	Bacteroidaceae	Bacteroides plebeius DSM 17135	2
Bacteroidetes	Bacteroidia	Bacteroidaceae	Bacteroides stercoris ATCC 43183	2
Bacteroidetes	Bacteroidia	Bacteroidaceae	Bacteroides thetaiotaomicron VPI-5482	4
Bacteroidetes	Bacteroidia	Bacteroidaceae	Bacteroides uniformis ATCC 8492	3
Bacteroidetes	Bacteroidia	Bacteroidaceae	Bacteroides vulgatus ATCC 8482	1
Chloroflexi	Chloroflexi	Chloroflexi	Chloroflexus aggregans DSM 9485	6	7
Chloroflexi	Chloroflexi	Chloroflexi	Chloroflexus sp. Y-400-fl	8
Chloroflexi	Chloroflexi	Chloroflexi	Herpetosiphon aurantiacus ATCC 23779	12
Chloroflexi	Chloroflexi	Chloroflexi	Roseiflexus castenholzii DSM 13941	5
Chloroflexi	Chloroflexi	Chloroflexi	Roseiflexus sp. RS-1	4
Deinococcus-Thermus	Deinococcus-Thermus	Deinococcus-Thermus	Deinococcus deserti VCD115	6	4
Deinococcus-Thermus	Deinococcus-Thermus	Deinococcus-Thermus	Deinococcus geothermalis DSM 11300	8
Deinococcus-Thermus	Deinococcus-Thermus	Deinococcus-Thermus	Deinococcus radiodurans R1	2
Deinococcus-Thermus	Deinococcus-Thermus	Deinococcus-Thermus	Thermus aquaticus Y51MC23	2
Deinococcus-Thermus	Deinococcus-Thermus	Deinococcus-Thermus	Thermus thermophilus HB27	2
Firmicutes	Bacilli	Bacillales	Anoxybacillus flavithermus WK1	7	12.1818
Firmicutes	Bacilli	Bacillales	Bacillus amyloliquefaciens FZB42	10
Firmicutes	Bacilli	Bacillales	Bacillus cereus ATCC 14579	11
Firmicutes	Bacilli	Bacillales	Bacillus clausii KSM-K16	17
Firmicutes	Bacilli	Bacillales	Bacillus halodurans C-125	14
Firmicutes	Bacilli	Bacillales	Bacillus licheniformis DSM 13	12
Firmicutes	Bacilli	Bacillales	Bacillus pumilus SAFR-032	10
Firmicutes	Bacilli	Bacillales	Bacillus subtilis subsp. subtilis str. 168	11
Firmicutes	Bacilli	Bacillales	Geobacillus kaustophilus HTA426	8
Firmicutes	Bacilli	Bacillales	Oceanobacillus iheyensis HTE831	8
Firmicutes	Bacilli	Bacillales	Paenibacillus sp. JDR-2	26
Firmicutes	Bacilli	Lactobacillaceae	Lactobacillus acidophilus NCFM	7	7.2
Firmicutes	Bacilli	Lactobacillaceae	Lactobacillus brevis ATCC 367	9
Firmicutes	Bacilli	Lactobacillaceae	Lactobacillus casei ATCC 334	8
Firmicutes	Bacilli	Lactobacillaceae	Lactobacillus delbrueckii subsp. bulgaricus ATCC BAA-365	2
Firmicutes	Bacilli	Lactobacillaceae	Lactobacillus fermentum IFO 3956	12
Firmicutes	Bacilli	Lactobacillaceae	Lactobacillus helveticus DPC 4571	2
Firmicutes	Bacilli	Lactobacillaceae	Lactobacillus johnsonii NCC 533	7
Firmicutes	Bacilli	Lactobacillaceae	Lactobacillus plantarum WCFS1	12
Firmicutes	Bacilli	Lactobacillaceae	Lactobacillus reuteri JCM 1112	9
Firmicutes	Bacilli	Lactobacillaceae	Lactobacillus rhamnosus GG	6
Firmicutes	Bacilli	Lactobacillaceae	Lactobacillus sakei subsp. sakei 23K	7
Firmicutes	Bacilli	Lactobacillaceae	Lactobacillus salivarius subsp. salivarius UCC118	5
Firmicutes	Bacilli	Lactobacillaceae	Leuconostoc mesenteroides subsp. mesenteroides ATCC 8293	11
Firmicutes	Bacilli	Lactobacillaceae	Oenococcus oeni PSU-1	6
Firmicutes	Bacilli	Lactobacillaceae	Pediococcus pentosaceus ATCC 25745	5
Firmicutes	Bacilli	Listeriaceae	Listeria innocua Clip11262	9	9.25
Firmicutes	Bacilli	Listeriaceae	Listeria monocytogenes EGD-e	11
Firmicutes	Bacilli	Listeriaceae	Listeria seeligeri serovar 1/2b str. SLCC3954	7
Firmicutes	Bacilli	Listeriaceae	Listeria welshimeri serovar 6b str. SLCC5334	10
Firmicutes	Bacilli	Enterococcaceae	Enterococcus faecalis V583	12	12
Firmicutes	Bacilli	Enterococcaceae	Enterococcus faecium DO	12
Firmicutes	Bacilli	Staphylococcaceae	Macrococcus caseolyticus JCSC5402	4	3.42857
Firmicutes	Bacilli	Staphylococcaceae	Staphylococcus aureus subsp. aureus N315	4
Firmicutes	Bacilli	Staphylococcaceae	Staphylococcus capitis SK14	2
Firmicutes	Bacilli	Staphylococcaceae	Staphylococcus carnosus subsp. carnosus TM300	4
Firmicutes	Bacilli	Staphylococcaceae	Staphylococcus epidermidis ATCC 12228	2
Firmicutes	Bacilli	Staphylococcaceae	Staphylococcus haemolyticus JCSC1435	4
Firmicutes	Bacilli	Staphylococcaceae	Staphylococcus saprophyticus subsp. saprophyticus ATCC 15305	4
Firmicutes	Bacilli	Streptococcaceae	Lactococcus lactis subsp. cremoris SK11	6	6.13333
Firmicutes	Bacilli	Streptococcaceae	Lactococcus lactis subsp. lactis Il1403	5
Firmicutes	Bacilli	Streptococcaceae	Streptococcus agalactiae 2603V/R	7
Firmicutes	Bacilli	Streptococcaceae	Streptococcus dysgalactiae subsp. equisimilis GGS_124	9
Firmicutes	Bacilli	Streptococcaceae	Streptococcus equi subsp. zooepidemicus MGCS10565	8
Firmicutes	Bacilli	Streptococcaceae	Streptococcus gallolyticus UCN34	7
Firmicutes	Bacilli	Streptococcaceae	Streptococcus gordonii str. Challis substr. CH1	5
Firmicutes	Bacilli	Streptococcaceae	Streptococcus mitis B6	4
Firmicutes	Bacilli	Streptococcaceae	Streptococcus mutans UA159	5
Firmicutes	Bacilli	Streptococcaceae	Streptococcus pneumoniae TIGR4	7
Firmicutes	Bacilli	Streptococcaceae	Streptococcus pyogenes M1 GAS	6
Firmicutes	Bacilli	Streptococcaceae	Streptococcus sanguinis SK36	5
Firmicutes	Bacilli	Streptococcaceae	Streptococcus suis 05ZYH33	7
Firmicutes	Bacilli	Streptococcaceae	Streptococcus thermophilus CNRZ1066	4
Firmicutes	Bacilli	Streptococcaceae	Streptococcus uberis 0140J	7
Firmicutes	Clostridia	Clostridia-1	Clostridium acetobutylicum ATCC 824	7	6.25
Firmicutes	Clostridia	Clostridia-1	Clostridium beijerincki NCIMB 8052	14
Firmicutes	Clostridia	Clostridia-1	Clostridium botulinum A str. ATCC 3502	2
Firmicutes	Clostridia	Clostridia-1	Clostridium butyricum 5521	10
Firmicutes	Clostridia	Clostridia-1	Clostridium kluyveri DSM 555	1
Firmicutes	Clostridia	Clostridia-1	Clostridium novyi NT	4
Firmicutes	Clostridia	Clostridia-1	Clostridium perfringens ATCC 13124	8
Firmicutes	Clostridia	Clostridia-1	Clostridium tetani E88	4
Firmicutes	Clostridia	Clostridia-2	Clostridium bartlettii DSM 16795	5	4.33333
Firmicutes	Clostridia	Clostridia-2	Clostridium difficile 630	6
Firmicutes	Clostridia	Clostridia-2	Clostridium hiranonis DSM 13275	2
Firmicutes	Clostridia	Thermoanaerobacterales	Anaerocellum thermophilum DSM 6725	8	6.85714
Firmicutes	Clostridia	Thermoanaerobacterales	Caldicellulosiruptor saccharolyticus DSM 8903	9
Firmicutes	Clostridia	Thermoanaerobacterales	Carboxydothermus hydrogenoformans Z-2901	0
Firmicutes	Clostridia	Thermoanaerobacterales	Moorella thermoacetica ATCC 39073	4
Firmicutes	Clostridia	Thermoanaerobacterales	Thermoanaerobacter ethanolicus X514	9
Firmicutes	Clostridia	Thermoanaerobacterales	Thermoanaerobacter italicus Ab9	9
Firmicutes	Clostridia	Thermoanaerobacterales	Thermoanaerobacter tengcongensis MB4	9
Proteobacteria	Alphaproteobacteria	Caulobacterales	Caulobacter crescentus CB15	11	10.5
Proteobacteria	Alphaproteobacteria	Caulobacterales	Caulobacter segnis ATCC 21756	12
Proteobacteria	Alphaproteobacteria	Caulobacterales	Caulobacter sp. K31	15
Proteobacteria	Alphaproteobacteria	Caulobacterales	Phenylobacterium zucineum HLK1	4
Proteobacteria	Alphaproteobacteria	Rhizobiales	Agrobacterium tumefaciens str. C58 (Cereon)	21	13.8667
Proteobacteria	Alphaproteobacteria	Rhizobiales	Azorhizobium caulinodans ORS 571	7
Proteobacteria	Alphaproteobacteria	Rhizobiales	Bartonella quintana str. Toulouse	0
Proteobacteria	Alphaproteobacteria	Rhizobiales	Bradyrhizobium japonicum USDA 110	7
Proteobacteria	Alphaproteobacteria	Rhizobiales	Bradyrhizobium sp. BTAi1	4
Proteobacteria	Alphaproteobacteria	Rhizobiales	Brucella melitensis 16M	5
Proteobacteria	Alphaproteobacteria	Rhizobiales	Mesorhizobium loti MAFF303099	19
Proteobacteria	Alphaproteobacteria	Rhizobiales	Mesorhizobium sp. BNC1	5
Proteobacteria	Alphaproteobacteria	Rhizobiales	Nitrobacter winogradskyi Nb-255	0
Proteobacteria	Alphaproteobacteria	Rhizobiales	Rhizobium etli CFN 42	32
Proteobacteria	Alphaproteobacteria	Rhizobiales	Rhizobium leguminosarum bv. viciae 3841	43
Proteobacteria	Alphaproteobacteria	Rhizobiales	Rhizobium sp. NGR234	31
Proteobacteria	Alphaproteobacteria	Rhizobiales	Rhodopseudomonas palustris CGA009	0
Proteobacteria	Alphaproteobacteria	Rhizobiales	Sinorhizobium meliloti 1021	28
Proteobacteria	Alphaproteobacteria	Rhizobiales	Xanthobacter autotrophicus Py2	6
Proteobacteria	Alphaproteobacteria	Rhodobacterales	Hyphomonas neptunium ATCC 15444	1	5
Proteobacteria	Alphaproteobacteria	Rhodobacterales	Jannaschia sp. CCS1	14
Proteobacteria	Alphaproteobacteria	Rhodobacterales	Loktanella vestfoldensis SKA53	4
Proteobacteria	Alphaproteobacteria	Rhodobacterales	Oceanicaulis alexandrii HTCC2633	0
Proteobacteria	Alphaproteobacteria	Rhodobacterales	Oceanicola batsensis HTCC2597	6
Proteobacteria	Alphaproteobacteria	Rhodobacterales	Oceanicola granulosus HTCC2516	7
Proteobacteria	Alphaproteobacteria	Rhodobacterales	Paracoccus denitrificans PD1222	9
Proteobacteria	Alphaproteobacteria	Rhodobacterales	Rhodobacter sphaeroides 2.4.1	6
Proteobacteria	Alphaproteobacteria	Rhodobacterales	Rhodobacterales bacterium HTCC2654	4
Proteobacteria	Alphaproteobacteria	Rhodobacterales	Roseobacter sp. MED193	5
Proteobacteria	Alphaproteobacteria	Rhodobacterales	Roseovarius nubinhibens ISM	5
Proteobacteria	Alphaproteobacteria	Rhodobacterales	Roseovarius sp. 217	4
Proteobacteria	Alphaproteobacteria	Rhodobacterales	Silicibacter pomeroyi DSS-3	5
Proteobacteria	Alphaproteobacteria	Rhodobacterales	Silicibacter TM1040	1
Proteobacteria	Alphaproteobacteria	Rhodobacterales	Sulfitobacter sp. EE-36	4
Proteobacteria	Alphaproteobacteria	Rhodospirillales	Acetobacter pasteurianus IFO 3283-01	0	3
Proteobacteria	Alphaproteobacteria	Rhodospirillales	Azospirillum sp. B510	12
Proteobacteria	Alphaproteobacteria	Rhodospirillales	Gluconacetobacter diazotrophicus PAl 5	12
Proteobacteria	Alphaproteobacteria	Rhodospirillales	Gluconobacter oxydans 621H	1
Proteobacteria	Alphaproteobacteria	Rhodospirillales	Granulibacter bethesdensis CGDNIH1	1
Proteobacteria	Alphaproteobacteria	Rhodospirillales	Magnetospirillum magneticum AMB-1	0
Proteobacteria	Alphaproteobacteria	Rhodospirillales	Magnetospirillum magnetotacticum MS-1	0
Proteobacteria	Alphaproteobacteria	Rhodospirillales	Rhodospirillum centenum SW	0
Proteobacteria	Alphaproteobacteria	Rhodospirillales	Rhodospirillum rubrum ATCC 11170	1
Proteobacteria	Alphaproteobacteria	Sphingomonadales	Erythrobacter litoralis HTCC2594	3	4
Proteobacteria	Alphaproteobacteria	Sphingomonadales	Erythrobacter sp. NAP1	2
Proteobacteria	Alphaproteobacteria	Sphingomonadales	Novosphingobium aromaticivorans DSM 12444	9
Proteobacteria	Alphaproteobacteria	Sphingomonadales	Sphingobium japonicum UT26S	4
Proteobacteria	Alphaproteobacteria	Sphingomonadales	Sphingomonas wittichii RW1	2
Proteobacteria	Alphaproteobacteria	Sphingomonadales	Sphingopyxis alaskensis RB2256	7
Proteobacteria	Alphaproteobacteria	Sphingomonadales	Zymomonas mobilis subsp. mobilis ZM4	1
Proteobacteria	Betaproteobacteria	Burkholderia	Burkholderia cepacia AMMD	11	10.375
Proteobacteria	Betaproteobacteria	Burkholderia	Burkholderia glumae BGR1	8
Proteobacteria	Betaproteobacteria	Burkholderia	Burkholderia mallei ATCC 23344	4
Proteobacteria	Betaproteobacteria	Burkholderia	Burkholderia phymatum STM815	21
Proteobacteria	Betaproteobacteria	Burkholderia	Burkholderia pseudomallei K96243	6
Proteobacteria	Betaproteobacteria	Burkholderia	Burkholderia sp. 383	11
Proteobacteria	Betaproteobacteria	Burkholderia	Burkholderia vietnamiensis G4	10
Proteobacteria	Betaproteobacteria	Burkholderia	Burkholderia xenovorans LB400	12
Proteobacteria	Betaproteobacteria	Comamonadaceae	Acidovorax avenae subsp. citrulli AAC00-1	5	5.90909
Proteobacteria	Betaproteobacteria	Comamonadaceae	Acidovorax sp. JS42	1
Proteobacteria	Betaproteobacteria	Comamonadaceae	Comamonas testosteroni KF-1	1
Proteobacteria	Betaproteobacteria	Comamonadaceae	Delftia acidovorans SPH-1	5
Proteobacteria	Betaproteobacteria	Comamonadaceae	Leptothrix cholodnii SP-6	12
Proteobacteria	Betaproteobacteria	Comamonadaceae	Methylibium petroleiphilum PM1	1
Proteobacteria	Betaproteobacteria	Comamonadaceae	Polaromonas naphthalenivorans CJ2	5
Proteobacteria	Betaproteobacteria	Comamonadaceae	Polaromonas sp. JS666	10
Proteobacteria	Betaproteobacteria	Comamonadaceae	Rhodoferax ferrireducens DSM 15236	2
Proteobacteria	Betaproteobacteria	Comamonadaceae	Variovorax paradoxus S110	7
Proteobacteria	Betaproteobacteria	Comamonadaceae	Verminephrobacter eiseniae EF01-2	16
Proteobacteria	Betaproteobacteria	Ralstonia	Cupriavidus taiwanensis	4	5.33333
Proteobacteria	Betaproteobacteria	Ralstonia	Ralstonia eutropha H16	6
Proteobacteria	Betaproteobacteria	Ralstonia	Ralstonia eutropha JMP134	6
Proteobacteria	Betaproteobacteria	Ralstonia	Ralstonia metallidurans CH34	4
Proteobacteria	Betaproteobacteria	Ralstonia	Ralstonia pickettii 12J	6
Proteobacteria	Betaproteobacteria	Ralstonia	Ralstonia solanacearum GMI1000	6
Proteobacteria	Betaproteobacteria	Various betaproteobacteria	Azoarcus sp. EbN1	0	0.333333
Proteobacteria	Betaproteobacteria	Various betaproteobacteria	Chromobacterium violaceum ATCC 12472	3
Proteobacteria	Betaproteobacteria	Various betaproteobacteria	Dechloromonas aromatica RCB	0
Proteobacteria	Betaproteobacteria	Various betaproteobacteria	Laribacter hongkongensis HLHK9	0
Proteobacteria	Betaproteobacteria	Various betaproteobacteria	Methylobacillus flagellatus KT	1
Proteobacteria	Betaproteobacteria	Various betaproteobacteria	Methylophilales bacterium HTCC2181	0
Proteobacteria	Betaproteobacteria	Various betaproteobacteria	Methylotenera mobilis JLW8	0
Proteobacteria	Betaproteobacteria	Various betaproteobacteria	Neisseria meningitidis MC58	0
Proteobacteria	Betaproteobacteria	Various betaproteobacteria	Nitrosomonas europaea ATCC 19718	0
Proteobacteria	Betaproteobacteria	Various betaproteobacteria	Nitrosospira multiformis ATCC 25196	0
Proteobacteria	Betaproteobacteria	Various betaproteobacteria	Thauera sp. MZ1T	0
Proteobacteria	Betaproteobacteria	Various betaproteobacteria	Thiobacillus denitrificans	0
Proteobacteria	Deltaproteobacteria	Desulfovibrionales	Desulfohalobium retbaense DSM 5692	0	0.5
Proteobacteria	Deltaproteobacteria	Desulfovibrionales	Desulfomicrobium baculatum DSM 4028	0
Proteobacteria	Deltaproteobacteria	Desulfovibrionales	Desulfovibrio desulfuricans G20	1
Proteobacteria	Deltaproteobacteria	Desulfovibrionales	Desulfovibrio desulfuricans subsp. desulfuricans str. ATCC 27774	1
Proteobacteria	Deltaproteobacteria	Desulfovibrionales	Desulfovibrio magneticus RS-1	0
Proteobacteria	Deltaproteobacteria	Desulfovibrionales	Desulfovibrio piger ATCC 29098	0
Proteobacteria	Deltaproteobacteria	Desulfovibrionales	Desulfovibrio salexigens DSM 2638	3
Proteobacteria	Deltaproteobacteria	Desulfovibrionales	Desulfovibrio vulgaris Hildenborough	0
Proteobacteria	Deltaproteobacteria	Desulfovibrionales	Desulfovibrio vulgaris str. Miyazaki F	0
Proteobacteria	Deltaproteobacteria	Desulfovibrionales	Lawsonia intracellularis PHE/MN1-00	0
Proteobacteria	Gammaproteobacteria	Alteromonadales	Alteromonadales bacterium TW-7	3	3.66667
Proteobacteria	Gammaproteobacteria	Alteromonadales	Alteromonas macleodii 'Deep ecotype'	5
Proteobacteria	Gammaproteobacteria	Alteromonadales	Colwellia psychrerythraea 34H	7
Proteobacteria	Gammaproteobacteria	Alteromonadales	Glaciecola sp. HTCC2999	1
Proteobacteria	Gammaproteobacteria	Alteromonadales	Idiomarina baltica OS145	0
Proteobacteria	Gammaproteobacteria	Alteromonadales	Idiomarina loihiensis L2TR	0
Proteobacteria	Gammaproteobacteria	Alteromonadales	Pseudoalteromonas atlantica T6c	9
Proteobacteria	Gammaproteobacteria	Alteromonadales	Pseudoalteromonas haloplanktis TAC125	4
Proteobacteria	Gammaproteobacteria	Alteromonadales	Pseudoalteromonas tunicata D2	4
Proteobacteria	Gammaproteobacteria	Enterobacteriales	Citrobacter koseri ATCC BAA-895	20	15.3333
Proteobacteria	Gammaproteobacteria	Enterobacteriales	Edwardsiella tarda EIB202	8
Proteobacteria	Gammaproteobacteria	Enterobacteriales	Enterobacter sp. 638	21
Proteobacteria	Gammaproteobacteria	Enterobacteriales	Erwinia amylovora ATCC 49946	17
Proteobacteria	Gammaproteobacteria	Enterobacteriales	Erwinia carotovora subsp. atroseptica SCRI1043	6
Proteobacteria	Gammaproteobacteria	Enterobacteriales	Escherichia coli str. K-12 substr. MG1655	11
Proteobacteria	Gammaproteobacteria	Enterobacteriales	Klebsiella pneumoniae subsp. pneumoniae MGH 78578	29
Proteobacteria	Gammaproteobacteria	Enterobacteriales	Photorhabdus luminescens subsp. laumondii TTO1	8
Proteobacteria	Gammaproteobacteria	Enterobacteriales	Proteus mirabilis HI4320	11
Proteobacteria	Gammaproteobacteria	Enterobacteriales	Salmonella typhimurium LT2	11
Proteobacteria	Gammaproteobacteria	Enterobacteriales	Serratia proteamaculans 568	28
Proteobacteria	Gammaproteobacteria	Enterobacteriales	Yersinia pestis KIM	14
Proteobacteria	Gammaproteobacteria	Oceanospirillales/Alteromonadales	Alcanivorax borkumensis SK2	0	4.33333
Proteobacteria	Gammaproteobacteria	Oceanospirillales/Alteromonadales	Cellvibrio japonicus Ueda107	7
Proteobacteria	Gammaproteobacteria	Oceanospirillales/Alteromonadales	Chromohalobacter salexigens DSM 3043	7
Proteobacteria	Gammaproteobacteria	Oceanospirillales/Alteromonadales	Hahella chejuensis KCTC 2396	9
Proteobacteria	Gammaproteobacteria	Oceanospirillales/Alteromonadales	Marinobacter aqueolei	0
Proteobacteria	Gammaproteobacteria	Oceanospirillales/Alteromonadales	Marinobacter sp. ELB17	1
Proteobacteria	Gammaproteobacteria	Oceanospirillales/Alteromonadales	Marinomonas sp. MWYL1	13
Proteobacteria	Gammaproteobacteria	Oceanospirillales/Alteromonadales	Oceanobacter sp. RED65	0
Proteobacteria	Gammaproteobacteria	Oceanospirillales/Alteromonadales	Oceanospirillum sp. MED92	0
Proteobacteria	Gammaproteobacteria	Oceanospirillales/Alteromonadales	Reinekea sp. MED297	4
Proteobacteria	Gammaproteobacteria	Oceanospirillales/Alteromonadales	Saccharophagus degradans 2-40	7
Proteobacteria	Gammaproteobacteria	Oceanospirillales/Alteromonadales	Teredinibacter turnerae T7901	4
Proteobacteria	Gammaproteobacteria	Pasteurellales	Actinobacillus pleuropneumoniae serovar 7 str. AP76	4	4.66667
Proteobacteria	Gammaproteobacteria	Pasteurellales	Actinobacillus succinogenes 130Z	7
Proteobacteria	Gammaproteobacteria	Pasteurellales	Aggregatibacter aphrophilus NJ8700	5
Proteobacteria	Gammaproteobacteria	Pasteurellales	Haemophilus ducreyi 35000HP	1
Proteobacteria	Gammaproteobacteria	Pasteurellales	Haemophilus influenzae Rd KW20	3
Proteobacteria	Gammaproteobacteria	Pasteurellales	Haemophilus parasuis SH0165	4
Proteobacteria	Gammaproteobacteria	Pasteurellales	Haemophilus somnus 2336	3
Proteobacteria	Gammaproteobacteria	Pasteurellales	Mannheimia succiniciproducens MBEL55E	9
Proteobacteria	Gammaproteobacteria	Pasteurellales	Pasteurella multocida subsp. multocida str. Pm70	6
Proteobacteria	Gammaproteobacteria	Pseudomonadaceae	Azotobacter vinelandii AvOP	9	4.5
Proteobacteria	Gammaproteobacteria	Pseudomonadaceae	Pseudomonas aeruginosa PAO1	4
Proteobacteria	Gammaproteobacteria	Pseudomonadaceae	Pseudomonas entomophila L48	3
Proteobacteria	Gammaproteobacteria	Pseudomonadaceae	Pseudomonas fluorescens Pf-5	6
Proteobacteria	Gammaproteobacteria	Pseudomonadaceae	Pseudomonas mendocina ymp	2
Proteobacteria	Gammaproteobacteria	Pseudomonadaceae	Pseudomonas putida KT2440	4
Proteobacteria	Gammaproteobacteria	Pseudomonadaceae	Pseudomonas stutzeri A1501	1
Proteobacteria	Gammaproteobacteria	Pseudomonadaceae	Pseudomonas syringae pv. tomato str. DC3000	7
Proteobacteria	Gammaproteobacteria	Psychromonadaceae/Aeromonadales	Aeromonas hydrophila subsp. hydrophila ATCC 7966	12	10
Proteobacteria	Gammaproteobacteria	Psychromonadaceae/Aeromonadales	Aeromonas salmonicida subsp. salmonicida A449	12
Proteobacteria	Gammaproteobacteria	Psychromonadaceae/Aeromonadales	Moritella sp. PE36	4
Proteobacteria	Gammaproteobacteria	Psychromonadaceae/Aeromonadales	Psychromonas ingrahamii 37	11
Proteobacteria	Gammaproteobacteria	Psychromonadaceae/Aeromonadales	Psychromonas sp. CNPT3	5
Proteobacteria	Gammaproteobacteria	Psychromonadaceae/Aeromonadales	Tolumonas auensis DSM 9187	16
Proteobacteria	Gammaproteobacteria	Shewanellaceae	Shewanella amazonensis SB2B	5	3
Proteobacteria	Gammaproteobacteria	Shewanellaceae	Shewanella baltica OS155	5
Proteobacteria	Gammaproteobacteria	Shewanellaceae	Shewanella denitrificans OS217	3
Proteobacteria	Gammaproteobacteria	Shewanellaceae	Shewanella frigidimarina NCIMB 400	4
Proteobacteria	Gammaproteobacteria	Shewanellaceae	Shewanella halifaxensis HAW-EB4	3
Proteobacteria	Gammaproteobacteria	Shewanellaceae	Shewanella loihica PV-4	2
Proteobacteria	Gammaproteobacteria	Shewanellaceae	Shewanella oneidensis MR-1	2
Proteobacteria	Gammaproteobacteria	Shewanellaceae	Shewanella pealeana ATCC 700345	3
Proteobacteria	Gammaproteobacteria	Shewanellaceae	Shewanella piezotolerans WP3	3
Proteobacteria	Gammaproteobacteria	Shewanellaceae	Shewanella putrefaciens CN-32	1
Proteobacteria	Gammaproteobacteria	Shewanellaceae	Shewanella sediminis HAW-EB3	1
Proteobacteria	Gammaproteobacteria	Shewanellaceae	Shewanella sp ANA-3	3
Proteobacteria	Gammaproteobacteria	Shewanellaceae	Shewanella sp MR-4	3
Proteobacteria	Gammaproteobacteria	Shewanellaceae	Shewanella sp MR-7	4
Proteobacteria	Gammaproteobacteria	Shewanellaceae	Shewanella sp W3-18-1	1
Proteobacteria	Gammaproteobacteria	Shewanellaceae	Shewanella woodyi ATCC 51908	5
Proteobacteria	Gammaproteobacteria	Vibrionales	Photobacterium profundum SS9	10	11.6
Proteobacteria	Gammaproteobacteria	Vibrionales	Vibrio angustum S14	8
Proteobacteria	Gammaproteobacteria	Vibrionales	Vibrio cholerae O1 biovar eltor str. N16961	11
Proteobacteria	Gammaproteobacteria	Vibrionales	Vibrio fischeri ES114	9
Proteobacteria	Gammaproteobacteria	Vibrionales	Vibrio harveyi ATCC BAA-1116	13
Proteobacteria	Gammaproteobacteria	Vibrionales	Vibrio parahaemolyticus RIMD 2210633	11
Proteobacteria	Gammaproteobacteria	Vibrionales	Vibrio salmonicida LFI1238	10
Proteobacteria	Gammaproteobacteria	Vibrionales	Vibrio shilonii AK1	20
Proteobacteria	Gammaproteobacteria	Vibrionales	Vibrio splendidus LGP32	9
Proteobacteria	Gammaproteobacteria	Vibrionales	Vibrio vulnificus CMCP6	15
Proteobacteria	Gammaproteobacteria	Xanthomonadales	Stenotrophomonas maltophilia K279a	8	7.25
Proteobacteria	Gammaproteobacteria	Xanthomonadales	Xanthomonas axonopodis pv. citri str. 306	10
Proteobacteria	Gammaproteobacteria	Xanthomonadales	Xanthomonas campestris pv. campestris str. ATCC 33913	10
Proteobacteria	Gammaproteobacteria	Xanthomonadales	Xylella fastidiosa 9a5c	1
Thermotogae	Thermotogae	Thermotogales	Fervidobacterium nodosum Rt17-B1	5	5.27273
Thermotogae	Thermotogae	Thermotogales	Petrotoga mobilis SJ95	7
Thermotogae	Thermotogae	Thermotogales	Thermosipho africanus TCF52B	6
Thermotogae	Thermotogae	Thermotogales	Thermosipho melanesiensis BI429	2
Thermotogae	Thermotogae	Thermotogales	Thermotoga lettingae TMO	11
Thermotogae	Thermotogae	Thermotogales	Thermotoga maritima MSB8	5
Thermotogae	Thermotogae	Thermotogales	Thermotoga naphthophila RKU-10	5
Thermotogae	Thermotogae	Thermotogales	Thermotoga neapolitana DSM 4359	4
Thermotogae	Thermotogae	Thermotogales	Thermotoga petrophila RKU-1	4
Thermotogae	Thermotogae	Thermotogales	Thermotoga sp. RQ2	3
Thermotogae	Thermotogae	Thermotogales	Thermotogales bacterium TBF 19.5.1	6
			Average number of LacI-TFs per genome:	7.47674
Total number of genomes: 344			Number of genomes with LacI-TFs:	309
			Total number of LacI-TFs:	2572
* Numbers of LacI family regulators are from the P2TF database.
1 Taxonomic collections are according to the standartized genomic collections used for the comparative genomics analysis in the RegPrecise database.

## Sheet: Regulogs
Regulog id1	Regulog	Orthologous group2	Taxonomic collection	Phylum	Regulated metabolic pathway	TF effector	Example TF locus tag	Example genome	Number of genomes	Number of regulons	Number of TF sites
5366	AAur_3503	-	Micrococcineae	Actinobacteria	Sugar utilization	null	AAur_3503	Arthrobacter aurescens TC1	14	2	4
5732	ABC1167	-	Bacillales	Firmicutes	Sugar utilization	null	ABC1167	Bacillus clausii KSM-K16	11	1	2
5219	AduR	-	Rhizobiales	Proteobacteria/Alpha	Adenosine utilization	Adenosine	RL3877	Rhizobium leguminosarum bv. viciae 3841	15	4	4
5550	AfrR	AfrR	Rhizobiales	Proteobacteria/Alpha	1,5-Anhydro-d-Fructose utilization	null	RL1820	Rhizobium leguminosarum bv. viciae 3841	15	6	19
5551	AfrR	AfrR	Rhodobacterales	Proteobacteria/Alpha	1,5-Anhydro-d-Fructose utilization	null	Jann_3927	Jannaschia sp. CCS1	15	1	3
5008	AglR	AglR	Rhizobiales	Proteobacteria/Alpha	Alpha-glucosides utilization	Alpha-glucoside	RL0744	Rhizobium leguminosarum bv. viciae 3841	15	7	24
5009	AglR	AglR	Rhodobacterales	Proteobacteria/Alpha	Alpha-glucosides utilization	Alpha-glucoside	Jann_1945	Jannaschia sp. CCS1	15	5	14
5482	AlsR	AlsR	Listeriaceae	Firmicutes	Allose utilization	Allose-6-phosphate	lmo0734	Listeria monocytogenes EGD-e	4	2	12
4607	AlsR	AlsR	Streptococcaceae	Firmicutes	Allose utilization	Allose-6-phosphate	LACR_1640	Lactococcus lactis subsp. cremoris SK11	15	1	2
1132	AscG	-	Enterobacteriales	Proteobacteria/Gamma	Beta-glucosides utilization, Cellobiose utilization	Beta-glucoside-6-phosphate, Cellobiose-6-phosphate	b2714	Escherichia coli str. K-12 substr. MG1655	12	7	28
5307	Bamb_2736	-	Burkholderia	Proteobacteria/Beta	Sugar utilization	null	Bamb_2736	Burkholderia cepacia AMMD	8	2	4
5264	Bamb_4155	-	Burkholderia	Proteobacteria/Beta	Sugar utilization	null	Bamb_4155	Burkholderia cepacia AMMD	8	3	3
5718	BC0230	-	Bacillales	Firmicutes	null	null	BC0230	Bacillus cereus ATCC 14579	11	1	2
5719	BC5402	-	Bacillales	Firmicutes	null	null	BC5402	Bacillus cereus ATCC 14579	11	1	2
5465	BfrR	-	Chloroflexi	Chloroflexi	Fructooligosaccharides utilization	null	Cagg_3715	Chloroflexus aggregans DSM 9485	5	2	2
4598	BfrR	BfrR	Lactobacillaceae	Firmicutes	Fructooligosaccharides utilization	null	LBA0500	Lactobacillus acidophilus NCFM	15	1	1
4597	BfrR	BfrR	Streptococcaceae	Firmicutes	Fructooligosaccharides utilization	null	SP_1799	Streptococcus pneumoniae TIGR4	15	4	7
5308	BgaR	BgaR	Bifidobacteriaceae	Actinobacteria	Galactosides utilization	Beta-galactoside	BL1171	Bifidobacterium longum NCC2705	9	6	26
5356	BgaR	BgaR	Micrococcineae	Actinobacteria	Galactosides utilization	Beta-galactoside	Jden_0100	Jonesia denitrificans DSM 20603	14	2	6
5291	BgaR	BgaR	Streptomycetaceae	Actinobacteria	Galactosides utilization	Beta-galactoside	SCO7411	Streptomyces coelicolor A3(2)	4	3	8
5258	BglR	BglR(1)	Alteromonadales	Proteobacteria/Gamma	Beta-glucosides utilization	Beta-glucoside	CPS_3709	Colwellia psychrerythraea 34H	9	6	35
576	BglR	BglR(1)	Shewanellaceae	Proteobacteria/Gamma	Beta-glucosides utilization	Beta-glucoside	Sfri_1314	Shewanella frigidimarina NCIMB 400	16	6	24
5339	BglR	BglR(1)	Vibrionales	Proteobacteria/Gamma	Beta-glucosides utilization	Beta-glucoside	VV21282	Vibrio vulnificus CMCP6	10	3	7
5606	BglR3	BglR(2)	Caulobacterales	Proteobacteria/Alpha	Beta-glucosides utilization	Beta-glucoside	CC2316	Caulobacter crescentus CB15	4	4	8
5575	BglR	BglR(2)	Sphingomonadales	Proteobacteria/Alpha	Beta-glucosides utilization	Beta-glucoside, Glucose	Saro_1609	Novosphingobium aromaticivorans DSM 12444	7	3	7
5734	BglR	BglR(3)	Enterococcaceae	Firmicutes	Beta-glucosides utilization	Beta-glucoside	EF1240	Enterococcus faecalis V583	2	1	2
5240	BglR	BglR(3)	Listeriaceae	Firmicutes	Beta-glucosides utilization	Beta-glucoside	lmo1727	Listeria monocytogenes EGD-e	4	4	8
5227	BglR1	-	Caulobacterales	Proteobacteria/Alpha	Beta-glucosides utilization	Beta-glucoside, Glucose	CC1753	Caulobacter crescentus CB15	4	2	2
5228	BglR2	-	Caulobacterales	Proteobacteria/Alpha	Beta-glucosides utilization	Beta-glucoside, Glucose	CC0969	Caulobacter crescentus CB15	4	3	10
5480	BglR2	-	Listeriaceae	Firmicutes	Beta-glucosides utilization	Beta-glucoside-6-phosphate	lmo0535	Listeria monocytogenes EGD-e	4	4	16
5267	BglR	-	Burkholderia	Proteobacteria/Beta	Beta-glucosides utilization	Beta-glucoside, Glucose	Bxe_B2079	Burkholderia xenovorans LB400	8	2	2
5345	BglR	-	Deinococcus-Thermus	Deinococcus-Thermus	Beta-glucosides utilization	Beta-glucoside	TTP0038	Thermus thermophilus HB27	5	3	4
5735	BglR	-	Enterobacteriales	Proteobacteria/Gamma	Beta-glucosides utilization	Beta-glucoside	y3567	Yersinia pestis KIM	12	1	2
1230	BglZ	-	Bacillales	Firmicutes	Beta-glucosides utilization	Beta-glucoside	BSU13870	Bacillus subtilis subsp. subtilis str. 168	11	5	8
5319	BH1250	-	Bacillales	Firmicutes	Sugar utilization	null	BH1250	Bacillus halodurans C-125	11	4	9
5481	BH1516	-	Bacillales	Firmicutes	Maltose utilization	null	BH1516	Bacillus halodurans C-125	11	2	6
5315	BL0426	-	Bifidobacteriaceae	Actinobacteria	Sugar utilization	null	BL0426	Bifidobacterium longum NCC2705	9	2	8
5637	bll3974	-	Rhizobiales	Proteobacteria/Alpha	null	null	bll3974	Bradyrhizobium japonicum USDA 110	15	2	5
5607	blr3394	-	Rhizobiales	Proteobacteria/Alpha	Sugar utilization	null	blr3394	Bradyrhizobium japonicum USDA 110	15	2	2
5317	Bphy_2245	-	Burkholderia	Proteobacteria/Beta	Sugar utilization	null	Bphy_2245	Burkholderia phymatum STM815	8	2	2
5314	Bphy_6994	-	Burkholderia	Proteobacteria/Beta	NULL	null	Bphy_6994	Burkholderia phymatum STM815	8	2	2
4804	Caur_1157	-	Chloroflexi	Chloroflexi	Beta-glucosides utilization	Beta-glucoside	Cagg_1685	Chloroflexus aggregans DSM 9485	5	3	7
4803	Caur_3448	-	Chloroflexi	Chloroflexi	Sugar utilization	null	Cagg_0275	Chloroflexus aggregans DSM 9485	5	5	9
5466	Caur_3866	-	Chloroflexi	Chloroflexi	Beta-glucosides utilization	Beta-glucoside	Cagg_0081	Chloroflexus aggregans DSM 9485	5	2	5
5233	CC1627	-	Caulobacterales	Proteobacteria/Alpha	Sugar utilization	null	CC1627	Caulobacter crescentus CB15	4	4	14
2992	CcpA	CcpA	Bacillales	Firmicutes	Carbohydrate metabolism, Carbon catabolism	Fructose-1,6-diphosphate, HPr, phosphocarrier protein	BSU29740	Bacillus subtilis subsp. subtilis str. 168	11	11	559
4703	CcpA	CcpA	Clostridia-1	Firmicutes	Carbohydrate metabolism, Carbon catabolism	Fructose-1,6-diphosphate, HPr, phosphocarrier protein	CAC3037	Clostridium acetobutylicum ATCC 824	8	8	436
4723	CcpA	CcpA	Clostridia-2	Firmicutes	Carbohydrate metabolism, Carbon catabolism	Fructose-1,6-diphosphate, HPr, phosphocarrier protein	CD1064	Clostridium difficile 630	3	3	123
3511	CcpA	CcpA	Lactobacillaceae	Firmicutes	Carbohydrate metabolism, Carbon catabolism	Fructose-1,6-diphosphate, HPr, phosphocarrier protein	lp_2256	Lactobacillus plantarum WCFS1	15	15	561
662	CcpA	CcpA	Staphylococcaceae	Firmicutes	Carbohydrate metabolism, Carbon catabolism	Fructose-1,6-diphosphate, HPr, phosphocarrier protein	SA1557	Staphylococcus aureus subsp. aureus N315	7	7	391
3584	CcpA	CcpA	Streptococcaceae	Firmicutes	Carbohydrate metabolism, Carbon catabolism	Fructose-1,6-diphosphate, HPr, phosphocarrier protein	SP_1999	Streptococcus pneumoniae TIGR4	15	15	968
4592	CcpB	CcpB	Lactobacillaceae	Firmicutes	unknown	null	lp_2602	Lactobacillus plantarum WCFS1	15	4	4
5721	CcpB	CcpB	Listeriaceae	Firmicutes	null	null	lmo2737	Listeria monocytogenes EGD-e	4	4	4
4591	CcpB	CcpB	Streptococcaceae	Firmicutes	Sugar utilization	null	SAG0784	Streptococcus agalactiae 2603V/R	15	5	5
5750	CD0683	-	Clostridia-2	Firmicutes	null	null	CD0683	Clostridium difficile 630	3	1	2
5493	CelR	CelR(1)	Enterobacteriales	Proteobacteria/Gamma	Cellobiose utilization	Cellobiose-6-phosphate	ECA3649	Erwinia carotovora subsp. atroseptica SCRI1043	12	3	16
5330	CelR	CelR(1)	Vibrionales	Proteobacteria/Gamma	Cellobiose utilization	Cellobiose-6-phosphate	VP2632	Vibrio parahaemolyticus RIMD 2210633	10	5	10
5448	CelR2	CelR(2)	Enterobacteriales	Proteobacteria/Gamma	Cellobiose utilization	Cellobiose-6-phosphate	y3949	Yersinia pestis KIM	12	2	2
5384	CelR2	CelR(2)	Vibrionales	Proteobacteria/Gamma	Cellobiose utilization	Cellobiose-6-phosphate	VC1557	Vibrio cholerae O1 biovar eltor str. N16961	10	3	6
5479	CelR	CelR(3)	Micrococcineae	Actinobacteria	Cellobiose utilization	Cellobiose	AAur_0084	Arthrobacter aurescens TC1	14	4	10
5272	CelR	CelR(3)	Streptomycetaceae	Actinobacteria	Cellobiose utilization	Cellobiose	SCO2794	Streptomyces coelicolor A3(2)	4	4	49
752	CelR	-	Thermotogales	Thermotogae	Cellobiose utilization	Cellobiose	TM1218	Thermotoga maritima MSB8	11	7	31
5358	CelR3	-	Vibrionales	Proteobacteria/Gamma	Cellobiose utilization	Cellobiose-6-phosphate	PBPRB2003	Photobacterium profundum SS9	10	2	3
5703	Cg2314	-	Corynebacteriaceae	Actinobacteria	Sugar utilization	null	cg2314	Corynebacterium glutamicum ATCC 13032	8	1	2
5326	DR2501	-	Deinococcus-Thermus	Deinococcus-Thermus	Sugar utilization	null	Dgeo_2243	Deinococcus geothermalis DSM 11300	5	3	8
1239	EbgR	EbgR	Enterobacteriales	Proteobacteria/Gamma	Galactosides utilization	Beta-galactosides	b3075	Escherichia coli str. K-12 substr. MG1655	12	2	5
5760	EbgR	EbgR	Psychromonadaceae/Aeromonadales	Proteobacteria/Gamma	Galactosides utilization	Beta-galactosides	AHA_0204	Aeromonas hydrophila subsp. hydrophila ATCC 7966	6	2	5
5759	EbgR	EbgR	Vibrionales	Proteobacteria/Gamma	Galactosides utilization	Beta-galactosides	VP2402	Vibrio parahaemolyticus RIMD 2210633	10	7	30
5757	ECA4246	-	Enterobacteriales	Proteobacteria/Gamma	Sugar utilization	null	ECA4246	Erwinia carotovora subsp. atroseptica SCRI1043	12	1	1
5733	EF1410	-	Enterococcaceae	Firmicutes	Sugar utilization	null	EF1410	Enterococcus faecalis V583	2	1	2
769	ExuR	ExuR	Bacillales	Firmicutes	Galacturonate utilization, Glucuronate utilization	Galacturonate, Glucuronate	BSU12370	Bacillus subtilis subsp. subtilis str. 168	11	4	5
5357	ExuR	ExuR	Clostridia-1	Firmicutes	Galacturonate utilization	Galacturonate	CAC0693	Clostridium acetobutylicum ATCC 824	8	3	20
4733	ExuR	ExuR	Lactobacillaceae	Firmicutes	Galacturonate utilization, Glucuronate utilization	Galacturonate, Glucuronate	LSA0130	Lactobacillus sakei subsp. sakei 23K	15	2	2
1135	FruR	FruR(1)	Enterobacteriales	Proteobacteria/Gamma	Central carbohydrate metabolism	Fructose-1,6-diphosphate, Fructose-1-phosphate	b0080	Escherichia coli str. K-12 substr. MG1655	12	12	213
2238	FruR	FruR(1)	Oceanospirillales/Alteromonadales	Proteobacteria/Gamma	Fructose utilization	Fructose-1,6-diphosphate, Fructose-1-phosphate	Csal_2649	Chromohalobacter salexigens DSM 3043	12	2	4
2235	FruR	FruR(1)	Pasteurellales	Proteobacteria/Gamma	Fructose utilization	Fructose-1,6-diphosphate, Fructose-1-phosphate	MS1317	Mannheimia succiniciproducens MBEL55E	9	2	2
2239	FruR	FruR(1)	Pseudomonadaceae	Proteobacteria/Gamma	Fructose utilization	Fructose-1,6-diphosphate, Fructose-1-phosphate	PA3563	Pseudomonas aeruginosa PAO1	8	8	16
2237	FruR	FruR(1)	Psychromonadaceae/Aeromonadales	Proteobacteria/Gamma	Fructose utilization	Fructose-1,6-diphosphate, Fructose-1-phosphate	AHA_2349	Aeromonas hydrophila subsp. hydrophila ATCC 7966	6	6	22
2234	FruR	FruR(1)	Vibrionales	Proteobacteria/Gamma	Fructose utilization	Fructose-1,6-diphosphate, Fructose-1-phosphate	VCA0519	Vibrio cholerae O1 biovar eltor str. N16961	10	10	60
5800	FruR2	FruR(2)	Comamonadaceae	Proteobacteria/Beta	Fructose utilization	Fructose-1-phosphate	Aave_4253	Acidovorax avenae subsp. citrulli AAC00-1	11	2	8
5323	FruR2	FruR(2)	Ralstonia	Proteobacteria/Beta	Fructose utilization	Fructose-1-phosphate	RSc2860	Ralstonia solanacearum GMI1000	6	2	8
5641	FruR2	FruR(2)	Rhodobacterales	Proteobacteria/Alpha	Fructose utilization	Fructose-1-phosphate	RSP_1785	Rhodobacter sphaeroides 2.4.1	15	1	3
5640	FruR2	FruR(2)	Rhodospirillales	Proteobacteria/Alpha	Fructose utilization	Fructose-1-phosphate	Rru_A1973	Rhodospirillum rubrum ATCC 11170	10	4	10
5801	FruR2	FruR(2)	Various betaproteobacteria	Proteobacteria/Beta	Fructose utilization	Fructose-1-phosphate	CV3051	Chromobacterium violaceum ATCC 12472	12	1	4
5251	FruR2	FruR(2)	Xanthomonadales	Proteobacteria/Gamma	Fructose utilization	Fructose-1-phosphate	XAC2500	Xanthomonas axonopodis pv. citri str. 306	4	3	11
5456	FruR	-	Micrococcineae	Actinobacteria	Fructose utilization	Fructose	CMM_2841	Clavibacter michiganensis subsp. michiganensis NCPPB 382	14	2	9
5242	GalR	GalR(1)	Alteromonadales	Proteobacteria/Gamma	Galactose utilization	Galactose	PSHAa1771	Pseudoalteromonas haloplanktis TAC125	9	2	6
5261	GalR	GalR(1)	Vibrionales	Proteobacteria/Gamma	Alpha-galactosides utilization, Galactose utilization, Lactose utilization	Galactose	VC2337	Vibrio cholerae O1 biovar eltor str. N16961	10	8	30
1123	GalR/GalS	GalR(1)	Enterobacteriales	Proteobacteria/Gamma	Galactose utilization	Galactose	b2837	Escherichia coli str. K-12 substr. MG1655	12	11	78
5263	GalR	GalR(1)	Pasteurellales	Proteobacteria/Gamma	Galactose utilization	Galactose	HI0821	Haemophilus influenzae Rd KW20	9	5	16
587	GalR	GalR(1)	Shewanellaceae	Proteobacteria/Gamma	Galactose utilization	Galactose	Swoo_2083	Shewanella woodyi ATCC 51908	16	1	2
4351	GalR	GalR(2)	Lactobacillaceae	Firmicutes	Galactose utilization, Galactosides utilization	Galactose	lp_3488	Lactobacillus plantarum WCFS1	15	11	30
4350	GalR	GalR(2)	Streptococcaceae	Firmicutes	Galactose utilization	Galactose	SP_1854	Streptococcus pneumoniae TIGR4	15	9	20
5302	GalR	-	Desulfovibrionales	Proteobacteria/Delta	Galactose utilization	Galactose	Dde_3654	Desulfovibrio desulfuricans G20	10	2	5
746	GalR	-	Thermotogales	Thermotogae	Galactosides utilization	Galactose	TM1200	Thermotoga maritima MSB8	11	9	19
776	GanR	-	Bacillales	Firmicutes	Galactan utilization	Beta-galactosides	BSU34170	Bacillus subtilis subsp. subtilis str. 168	11	5	8
5568	GapR	-	Rhodobacterales	Proteobacteria/Alpha	Central carbohydrate metabolism	null	Jann_0311	Jannaschia sp. CCS1	15	13	171
747	GloR	-	Thermotogales	Thermotogae	Fucose-glucose oligosaccharide utilization	null	TM0299	Thermotoga maritima MSB8	11	5	8
5229	GluR	-	Caulobacterales	Proteobacteria/Alpha	Carbohydrate metabolism	Glucose	CC2053	Caulobacter crescentus CB15	4	3	17
5046	GntR	GntR(1)	Alteromonadales	Proteobacteria/Gamma	Gluconate utilization	Gluconate	PSHAb0478	Pseudoalteromonas haloplanktis TAC125	9	1	5
1169	GntR	GntR(1)	Enterobacteriales	Proteobacteria/Gamma	Gluconate utilization	Gluconate	b3438	Escherichia coli str. K-12 substr. MG1655	12	12	61
5048	GntR	GntR(1)	Oceanospirillales/Alteromonadales	Proteobacteria/Gamma	Gluconate utilization	Gluconate	HCH_03544	Hahella chejuensis KCTC 2396	12	3	8
590	GntR	GntR(1)	Shewanellaceae	Proteobacteria/Gamma	Gluconate utilization	Gluconate	Sbal_4089	Shewanella baltica OS155	16	1	4
5045	GntR	GntR(1)	Pasteurellales	Proteobacteria/Gamma	Gluconate utilization	Gluconate	MS1242	Mannheimia succiniciproducens MBEL55E	9	7	28
5044	GntR	GntR(1)	Vibrionales	Proteobacteria/Gamma	Gluconate utilization	Gluconate	VC0289	Vibrio cholerae O1 biovar eltor str. N16961	10	8	33
5047	GntR	GntR(1)	Psychromonadaceae/Aeromonadales	Proteobacteria/Gamma	Gluconate utilization	Gluconate	AHA_0290	Aeromonas hydrophila subsp. hydrophila ATCC 7966	6	5	22
5052	GntR	GntR(2)	Burkholderia	Proteobacteria/Beta	Gluconate utilization	Gluconate	Bphy_5547	Burkholderia phymatum STM815	8	1	4
5053	GntR	GntR(2)	Comamonadaceae	Proteobacteria/Beta	Gluconate utilization	Gluconate	Rfer_0957	Rhodoferax ferrireducens DSM 15236	11	8	28
5049	GntR	GntR(2)	Pseudomonadaceae	Proteobacteria/Gamma	Gluconate utilization	Gluconate	PA2320	Pseudomonas aeruginosa PAO1	8	8	32
5055	GntR	GntR(2)	Rhizobiales	Proteobacteria/Alpha	Gluconate utilization	Gluconate	Xaut_1236	Xanthobacter autotrophicus Py2	15	1	4
5057	GntR	GntR(2)	Rhodospirillales	Proteobacteria/Alpha	Gluconate utilization	Gluconate	AZL_d00370	Azospirillum sp. B510	9	1	4
5054	GntR	GntR(2)	Various betaproteobacteria	Proteobacteria/Beta	Gluconate utilization	Gluconate	CV2956	Chromobacterium violaceum ATCC 12472	12	1	1
5306	GntR2	-	Bacillales	Firmicutes	Gluconate utilization	Gluconate	GK1942	Geobacillus kaustophilus HTA426	11	4	8
4610	GntR2	-	Lactobacillaceae	Firmicutes	Gluconate utilization	Gluconate	LAF_1049	Lactobacillus fermentum IFO 3956	15	2	2
5262	HpxR	-	Ralstonia	Proteobacteria/Beta	Xanthine utilization	Xanthine	H16_B0864	Ralstonia eutropha H16	6	3	3
4614	HxlR	-	Lactobacillaceae	Firmicutes	Hexulose metabolism	null	LVIS_0444	Lactobacillus brevis ATCC 367	15	2	4
4627	IdnR	-	Enterobacteriales	Proteobacteria/Gamma	Idonate utilization	5-dehydro-D-gluconate, L-idonate	b4264	Escherichia coli str. K-12 substr. MG1655	12	4	7
5572	IdnR	-	Rhizobiales	Proteobacteria/Alpha	Idonate utilization	L-idonate	Atu4685	Agrobacterium tumefaciens str. C58 (Cereon)	15	7	32
5239	IolR	-	Micrococcineae	Actinobacteria	Inositol utilization	null	AAur_1987	Arthrobacter aurescens TC1	14	2	6
5731	IolR	-	Oceanospirillales/Alteromonadales	Proteobacteria/Gamma	Inositol utilization	null	HCH_03302	Hahella chejuensis KCTC 2396	12	1	1
5545	IolR	-	Rhizobiales	Proteobacteria/Alpha	Inositol utilization	null	mlr1005	Mesorhizobium loti MAFF303099	15	2	8
5546	IolR	-	Rhodobacterales	Proteobacteria/Alpha	Inositol utilization	null	Jann_1424	Jannaschia sp. CCS1	15	3	13
5450	IolR	-	Streptomycetaceae	Actinobacteria	Inositol utilization	null	SAV_7156	Streptomyces avermitilis MA-4680	4	2	8
5290	IolR	-	Thermoanaerobacterales	Firmicutes	Inositol utilization	null	TTE1952	Thermoanaerobacter tengcongensis MB4	7	5	7
1384	IolR1	-	Bacillales	Firmicutes	Inositol utilization	null	BSU10840	Bacillus subtilis subsp. subtilis str. 168	11	5	13
1387	IolR2	-	Bacillales	Firmicutes	Inositol utilization	null	BH2313	Bacillus halodurans C-125	11	2	4
5241	IolR2	-	Corynebacteriaceae	Actinobacteria	Inositol utilization	null	cg0210	Corynebacterium glutamicum ATCC 13032	8	1	2
5547	Jann_1107	-	Rhodobacterales	Proteobacteria/Alpha	Sugar utilization	null	Jann_1107	Jannaschia sp. CCS1	15	2	5
1434	KdgR	-	Bacillales	Firmicutes	Galacturonate utilization, Glucuronate utilization	2-keto-3-deoxygluconate	BSU22120	Bacillus subtilis subsp. subtilis str. 168	11	3	13
4647	KdgR	-	Bacteroidaceae	Bacteroidetes	Galacturonate utilization, Glucuronate utilization	2-keto-3-deoxygluconate	BT0487	Bacteroides thetaiotaomicron VPI-5482	11	10	62
5548	KglR	KglR	Rhizobiales	Proteobacteria/Alpha	Sugar utilization	null	SMa0078	Sinorhizobium meliloti 1021	15	2	2
5549	KglR	KglR	Rhodobacterales	Proteobacteria/Alpha	Sugar utilization	null	Pden_5078	Paracoccus denitrificans PD1222	15	1	1
5274	KojR	KojR	Bacillales	Firmicutes	Kojibiose utilization	Kojibiose	BH3692	Bacillus halodurans C-125	11	2	5
5273	KojR	KojR	Thermoanaerobacterales	Firmicutes	Kojibiose utilization	Kojibiose	TTE0797	Thermoanaerobacter tengcongensis MB4	7	5	11
5461	KojR	-	Chloroflexi	Chloroflexi	Kojibiose utilization	Kojibiose	Cagg_2268	Chloroflexus aggregans DSM 9485	5	2	5
1152	LacI	-	Enterobacteriales	Proteobacteria/Gamma	Lactose utilization	Allolactose	b0345	Escherichia coli str. K-12 substr. MG1655	12	5	5
4596	LacR	-	Lactobacillaceae	Firmicutes	Lactose utilization	Lactose	lp_3470	Lactobacillus plantarum WCFS1	15	7	11
4630	LACR_0766	-	Streptococcaceae	Firmicutes	Sugar utilization	null	LACR_0766	Lactococcus lactis subsp. cremoris SK11	15	2	3
4616	LBA1472	-	Lactobacillaceae	Firmicutes	Sugar utilization	null	LBA1472	Lactobacillus acidophilus NCFM	15	2	4
4996	LfaR	-	Enterobacteriales	Proteobacteria/Gamma	Sugar utilization	null	y3231	Yersinia pestis KIM	12	6	23
4615	LJ1265	-	Lactobacillaceae	Firmicutes	Pentose utilization	null	LJ1265	Lactobacillus johnsonii NCC 533	15	2	4
5294	Lmo0031	-	Listeriaceae	Firmicutes	Sugar utilization	null	lmo0031	Listeria monocytogenes EGD-e	4	2	8
4569	Lp_3221	-	Lactobacillaceae	Firmicutes	Sugar utilization	null	lp_3221	Lactobacillus plantarum WCFS1	15	3	6
4611	LSEI_0368	-	Lactobacillaceae	Firmicutes	Sugar utilization	null	LSEI_0368	Lactobacillus casei ATCC 334	15	2	8
1161	MalI	MalI	Enterobacteriales	Proteobacteria/Gamma	Maltose utilization	null	b1620	Escherichia coli str. K-12 substr. MG1655	12	5	19
5304	MalI	MalI	Vibrionales	Proteobacteria/Gamma	Maltose utilization	null	VF_1720	Vibrio fischeri ES114	10	4	15
5246	MalR	MalR(1)	Alteromonadales	Proteobacteria/Gamma	Maltodextrin utilization, Maltose utilization	Maltose	CPS_0974	Colwellia psychrerythraea 34H	9	7	44
5440	MalR	MalR(1)	Xanthomonadales	Proteobacteria/Gamma	Maltodextrin utilization, Maltose utilization	Maltose	XCC2464	Xanthomonas campestris pv. campestris str. ATCC 33913	4	3	14
599	MalR	MalR(1)	Shewanellaceae	Proteobacteria/Gamma	Maltodextrin utilization	Maltose	Sfri_1772	Shewanella frigidimarina NCIMB 400	16	11	67
5574	MalR	MalR(1)	Sphingomonadales	Proteobacteria/Alpha	Maltose utilization	Maltose	Saro_1887	Novosphingobium aromaticivorans DSM 12444	7	3	6
3576	MalR	MalR(2)	Lactobacillaceae	Firmicutes	Maltodextrin utilization, Maltose utilization	Maltose	lp_0172	Lactobacillus plantarum WCFS1	15	7	11
681	MalR	MalR(2)	Staphylococcaceae	Firmicutes	Maltodextrin utilization, Maltose utilization	Maltose	SA1339	Staphylococcus aureus subsp. aureus N315	7	4	5
3564	MalR	MalR(2)	Streptococcaceae	Firmicutes	Maltodextrin utilization, Maltose utilization	Maltose	SP_2112	Streptococcus pneumoniae TIGR4	15	15	80
5250	MalR2	MalR(2)	Thermoanaerobacterales	Firmicutes	Maltodextrin utilization, Maltose utilization	Maltose	TTE2576	Thermoanaerobacter tengcongensis MB4	7	5	17
5276	MalR2	MalR(2)	Bacillales	Firmicutes	Maltodextrin utilization, Maltose utilization	Maltose	BH2923	Bacillus halodurans C-125	11	7	24
5270	MalR2	MalR(2)	Clostridia-1	Firmicutes	Maltodextrin utilization, Maltose utilization	Maltose	CBO1601	Clostridium botulinum A str. ATCC 3502	8	4	10
5279	MalR1	-	Clostridia-1	Firmicutes	Maltodextrin utilization, Maltose utilization	Maltose	Cbei_0863	Clostridium beijerincki NCIMB 8052	8	4	4
4586	MalR2	-	Streptococcaceae	Firmicutes	Maltodextrin utilization, Maltose utilization	Maltose	SPy1297	Streptococcus pyogenes M1 GAS	15	4	4
4609	MalR3	-	Lactobacillaceae	Firmicutes	Maltodextrin utilization, Maltose utilization	Maltose	lp_3531	Lactobacillus plantarum WCFS1	15	6	17
5741	ManR	-	Psychromonadaceae/Aeromonadales	Proteobacteria/Gamma	Mannose utilization	Mannose-6-phosphate	AHA_2344	Aeromonas hydrophila subsp. hydrophila ATCC 7966	6	1	5
5286	ManR	-	Streptomycetaceae	Actinobacteria	Mannose utilization, Mannosides utilization	Mannose	SCO1078	Streptomyces coelicolor A3(2)	4	4	15
5278	ManR	ManR(1)	Xanthomonadales	Proteobacteria/Gamma	Mannose utilization, Mannosides utilization	Mannose	XAC1555	Xanthomonas axonopodis pv. citri str. 306	4	3	13
5739	ManR1	ManR(1)	Alteromonadales	Proteobacteria/Gamma	Mannose utilization, Mannosides utilization	Mannose	CPS_2652	Colwellia psychrerythraea 34H	9	3	7
600	ManR1	ManR(1)	Shewanellaceae	Proteobacteria/Gamma	Mannose utilization, Mannosides utilization	Mannose	Sama_0565	Shewanella amazonensis SB2B	16	2	4
5736	ManR2	ManR(2)	Alteromonadales	Proteobacteria/Gamma	Mannose utilization, Mannosides utilization	Mannose	Patl_0121	Pseudoalteromonas atlantica T6c	9	1	5
601	ManR2	ManR(2)	Shewanellaceae	Proteobacteria/Gamma	Mannose utilization, Mannosides utilization	Mannose	Sama_0294	Shewanella amazonensis SB2B	16	1	5
1179	MdxR	MdxR	Bacillales	Firmicutes	Maltodextrin utilization, Maltose utilization	Maltose	BSU34630	Bacillus subtilis subsp. subtilis str. 168	11	2	4
4604	MdxR	MdxR	Lactobacillaceae	Firmicutes	Maltodextrin utilization, Maltose utilization	Maltose	lp_0173	Lactobacillus plantarum WCFS1	15	6	11
5410	MdxR	MdxR	Listeriaceae	Firmicutes	Maltodextrin utilization, Maltose utilization	Maltose	lmo2128	Listeria monocytogenes EGD-e	4	4	8
4605	MdxR	MdxR	Streptococcaceae	Firmicutes	Maltodextrin utilization, Maltose utilization	Maltose	SSU05_2066	Streptococcus suis 05ZYH33	15	1	1
5742	Csal_3216	-	Oceanospirillales/Alteromonadales	Proteobacteria/Gamma	Sugar utilization	null	Csal_3216	Chromohalobacter salexigens DSM 3043	12	1	4
5638	Mll1683	Mll1683	Rhizobiales	Proteobacteria/Alpha	Sugar utilization	null	mll1683	Mesorhizobium loti MAFF303099	15	6	16
5639	SPOA0336	Mll1683	Rhodobacterales	Proteobacteria/Alpha	Sugar utilization	null	SPOA0336	Silicibacter pomeroyi DSS-3	15	2	6
5091	MocR	MocR	Rhizobiales	Proteobacteria/Alpha	Rhizopine catabolism	Rhizopine	SMb20817	Sinorhizobium meliloti 1021	15	5	12
1174	MsmR	-	Bacillales	Firmicutes	Alpha-galactosides utilization	Alpha-galactosides	BSU30260	Bacillus subtilis subsp. subtilis str. 168	11	5	6
5281	MsmR	MsmR	Bifidobacteriaceae	Actinobacteria	Sugar utilization	null	BAD_1584	Bifidobacterium adolescentis ATCC 15703	9	3	11
5457	MsmR	MsmR	Micrococcineae	Actinobacteria	Sugar utilization	null	AAur_3250	Arthrobacter aurescens TC1	14	3	8
1521	NagR	NagR	Alteromonadales	Proteobacteria/Gamma	N-acetylglucosamine utilization	N-acetylglucosamine	CPS_1019	Colwellia psychrerythraea 34H	9	3	27
1523	NagR	NagR	Oceanospirillales/Alteromonadales	Proteobacteria/Gamma	N-acetylglucosamine utilization	N-acetylglucosamine	Sde_3042	Saccharophagus degradans 2-40	12	3	19
605	NagR	NagR	Shewanellaceae	Proteobacteria/Gamma	N-acetylglucosamine utilization	N-acetylglucosamine	SO_3516	Shewanella oneidensis MR-1	16	15	105
1526	NagR	NagR	Xanthomonadales	Proteobacteria/Gamma	N-acetylglucosamine utilization	N-acetylglucosamine	XF1463	Xylella fastidiosa 9a5c	4	4	17
783	NtdR	-	Bacillales	Firmicutes	Neotrehalosadiamine biosynthesis	3,3'-neotrehalosadiamine	BSU10560	Bacillus subtilis subsp. subtilis str. 168	11	3	7
4600	OglR	OglR	Lactobacillaceae	Firmicutes	Oligoglucoside utilization	null	LJ0744	Lactobacillus johnsonii NCC 533	15	2	2
4599	OglR	OglR	Streptococcaceae	Firmicutes	Oligoglucoside utilization	null	SMU.105	Streptococcus mutans UA159	15	1	1
4602	OglR2	-	Lactobacillaceae	Firmicutes	Oligoglucoside utilization	null	LSEI_0400	Lactobacillus casei ATCC 334	15	1	1
5745	Patl_0292	-	Alteromonadales	Proteobacteria/Gamma	null	null	Patl_0292	Pseudoalteromonas atlantica T6c	9	1	2
5015	PckR	-	Rhizobiales	Proteobacteria/Alpha	Central carbohydrate metabolism	null	RL4145	Rhizobium leguminosarum bv. viciae 3841	15	10	103
5243	PFL_0254	-	Pseudomonadaceae	Proteobacteria/Gamma	Sugar utilization	null	PFL_0254	Pseudomonas fluorescens Pf-5	8	3	4
5726	PMI2934	-	Enterobacteriales	Proteobacteria/Gamma	Sugar utilization	null	PMI2934	Proteus mirabilis HI4320	12	1	1
5609	pRL90265	-	Rhizobiales	Proteobacteria/Alpha	Sugar utilization	null	pRL90265	Rhizobium leguminosarum bv. viciae 3841	15	3	8
5087	PsiR	-	Rhizobiales	Proteobacteria/Alpha	Psicose utilization	Psicose	Atu4743	Agrobacterium tumefaciens str. C58 (Cereon)	15	4	16
5738	PtsR	-	Enterobacteriales	Proteobacteria/Gamma	Sugar utilization	null	Ent638_0983	Enterobacter sp. 638	12	1	2
5284	PtxS	PtxS	Burkholderia	Proteobacteria/Beta	2-ketogluconate utilization, Gluconate utilization	2-keto-D-gluconate	BPSL1578	Burkholderia pseudomallei K96243	8	8	11
5329	PtxS	PtxS	Enterobacteriales	Proteobacteria/Gamma	Gluconate utilization	2-keto-D-gluconate	Spro_0061	Serratia proteamaculans 568	12	5	5
5297	PtxS	PtxS	Pseudomonadaceae	Proteobacteria/Gamma	Gluconate utilization	2-keto-D-gluconate	PA2259	Pseudomonas aeruginosa PAO1	8	4	10
5321	PtxS	PtxS	Ralstonia	Proteobacteria/Beta	Gluconate utilization	2-keto-D-gluconate	Rpic_0693	Ralstonia pickettii 12J	6	2	3
1131	PurR	PurR	Enterobacteriales	Proteobacteria/Gamma	Purine metabolism	Guanine, Hypoxanthine	b1658	Escherichia coli str. K-12 substr. MG1655	12	12	313
2256	PurR	PurR	Pasteurellales	Proteobacteria/Gamma	Purine metabolism	Guanine, Hypoxanthine	HI1635	Haemophilus influenzae Rd KW20	9	9	77
2255	PurR	PurR	Vibrionales	Proteobacteria/Gamma	Purine metabolism	Guanine, Hypoxanthine	VC1721	Vibrio cholerae O1 biovar eltor str. N16961	10	10	149
5338	RafR	-	Enterobacteriales	Proteobacteria/Gamma	Raffinose utilization	Raffinose	ECA0755	Erwinia carotovora subsp. atroseptica SCRI1043	12	4	8
2284	RbsR	RbsR(1)	Burkholderia	Proteobacteria/Beta	Ribose utilization	Ribose	BPSL1831	Burkholderia pseudomallei K96243	8	7	7
2285	RbsR	RbsR(1)	Comamonadaceae	Proteobacteria/Beta	Ribose utilization	Ribose	Aave_4199	Acidovorax avenae subsp. citrulli AAC00-1	11	2	2
2273	RbsR	RbsR(1)	Desulfovibrionales	Proteobacteria/Delta	Ribose utilization	Ribose	Desal_2548	Desulfovibrio salexigens DSM 2638	10	1	1
1156	RbsR	RbsR(1)	Enterobacteriales	Proteobacteria/Gamma	Ribose utilization	Ribose	b3753	Escherichia coli str. K-12 substr. MG1655	12	11	17
2276	RbsR	RbsR(1)	Pasteurellales	Proteobacteria/Gamma	Ribose utilization	Ribose	HI0506	Haemophilus influenzae Rd KW20	9	6	6
2280	RbsR	RbsR(1)	Pseudomonadaceae	Proteobacteria/Gamma	Ribose utilization	Ribose	PA1949	Pseudomonas aeruginosa PAO1	8	5	5
2278	RbsR	RbsR(1)	Psychromonadaceae/Aeromonadales	Proteobacteria/Gamma	Ribose utilization	Ribose	AHA_2314	Aeromonas hydrophila subsp. hydrophila ATCC 7966	6	6	8
2274	RbsR	RbsR(1)	Ralstonia	Proteobacteria/Beta	Ribose utilization	Ribose	RS04266	Ralstonia solanacearum GMI1000	6	2	2
620	RbsR	RbsR(1)	Shewanellaceae	Proteobacteria/Gamma	Ribose utilization	Ribose	Shal_0583	Shewanella halifaxensis HAW-EB4	16	2	4
2275	RbsR	RbsR(1)	Vibrionales	Proteobacteria/Gamma	Ribose utilization	Ribose	VCA0132	Vibrio cholerae O1 biovar eltor str. N16961	10	10	15
1176	RbsR	RbsR(2)	Bacillales	Firmicutes	Ribose utilization	Ribose	BSU35910	Bacillus subtilis subsp. subtilis str. 168	11	11	11
694	RbsR2	RbsR(2)	Staphylococcaceae	Firmicutes	Ribose utilization	Ribose	SH0174	Staphylococcus haemolyticus JCSC1435	7	6	7
4361	RbsR2	RbsR(2)	Streptococcaceae	Firmicutes	Ribose utilization	Ribose	SDEG_1537	Streptococcus dysgalactiae subsp. equisimilis GGS_124	15	7	9
5083	RbsR2	RbsR(3)	Rhizobiales	Proteobacteria/Alpha	Ribose utilization	Ribose	Atu3062	Agrobacterium tumefaciens str. C58 (Cereon)	15	2	4
5084	RbsR2	RbsR(3)	Rhodobacterales	Proteobacteria/Alpha	Ribose utilization	Ribose	RSP_3686	Rhodobacter sphaeroides 2.4.1	15	1	3
693	RbsR	RbsR(4)	Staphylococcaceae	Firmicutes	Ribose utilization	Ribose	SA0261	Staphylococcus aureus subsp. aureus N315	7	2	2
3945	RbsR	RbsR(4)	Lactobacillaceae	Firmicutes	Ribose utilization	Ribose	lp_3661	Lactobacillus plantarum WCFS1	15	10	18
5313	RbsR	-	Streptomycetaceae	Actinobacteria	Ribose utilization	Ribose	SCO2745	Streptomyces coelicolor A3(2)	4	3	3
5289	RbsR	-	Clostridia-1	Firmicutes	Ribose utilization	Ribose	CTC02346	Clostridium tetani E88	8	4	5
3852	RbsR	-	Corynebacteriaceae	Actinobacteria	Ribose utilization	Ribose	cg1410	Corynebacterium glutamicum ATCC 13032	8	3	6
5445	RbsR	-	Thermoanaerobacterales	Firmicutes	Ribose utilization	Ribose	TTE0201	Thermoanaerobacter tengcongensis MB4	7	2	4
756	RbsR	-	Thermotogales	Thermotogae	Ribose utilization	Ribose	TM0949	Thermotoga maritima MSB8	11	8	15
5088	RbtR	-	Rhodobacterales	Proteobacteria/Alpha	Ribitol utilization	Ribitol	RSP_3700	Rhodobacter sphaeroides 2.4.1	15	1	4
4345	RegR	-	Streptococcaceae	Firmicutes	Hyaluronate utilization	Hyaluronate oligosaccharide phosphate	SP_0330	Streptococcus pneumoniae TIGR4	15	6	27
5748	Bpro_5109	Reut_C5892	Comamonadaceae	Proteobacteria/Beta	Sugar utilization	null	Bpro_5109	Verminephrobacter eiseniae EF01-2	11	2	3
5746	Reut_C5892	Reut_C5892	Ralstonia	Proteobacteria/Beta	Sugar utilization	null	Reut_C5892	Ralstonia eutropha JMP134	6	1	1
5365	RhaR	RhaR	Frankineae/Propionibacterineae/Pseudonocardiaceae	Actinobacteria	Rhamnose utilization	Rhamnose	SACE_5204	Saccharopolyspora erythraea NRRL 2338	9	2	10
5293	RhaR	RhaR	Micrococcineae	Actinobacteria	Rhamnose utilization	Rhamnose	Arth_3308	Arthrobacter sp. FB24	14	5	29
5310	RhaR	RhaR	Mycobacteriaceae	Actinobacteria	Rhamnose utilization	Rhamnose	MSMEG_0592	Mycobacterium smegmatis str. MC2 155	9	2	2
5455	RhaR	RhaR	Nocardiaceae	Actinobacteria	Rhamnose utilization	Rhamnose	nfa32970	Nocardia farcinica IFM 10152	4	2	5
5288	RhaR	RhaR	Streptomycetaceae	Actinobacteria	Rhamnose utilization	Rhamnose	SCO0806	Streptomyces coelicolor A3(2)	4	3	14
5334	RhiR	RhiR	Enterobacteriales	Proteobacteria/Gamma	Rhamnogalacturonides utilization	Rhamogalacturonate oligosaccharides	ECA3745	Erwinia carotovora subsp. atroseptica SCRI1043	12	1	2
5086	RhiR	RhiR	Rhizobiales	Proteobacteria/Alpha	Rhamnogalacturonides utilization	Rhamogalacturonate oligosaccharides	Atu4556	Agrobacterium tumefaciens str. C58 (Cereon)	15	4	16
5463	RhmR	-	Chloroflexi	Chloroflexi	Rhamnose oligosaccharides utilization	null	Chy400_0392	Chloroflexus sp. Y-400-fl	5	1	1
5013	RL3595	RL3595	Rhizobiales	Proteobacteria/Alpha	Sugar utilization	null	RL3595	Rhizobium leguminosarum bv. viciae 3841	15	4	8
5014	OB2597_06045	RL3595	Rhodobacterales	Proteobacteria/Alpha	Sugar utilization	null	OB2597_06045	Oceanicola batsensis HTCC2597	15	1	2
5225	RL4253	RL4253	Rhizobiales	Proteobacteria/Alpha	Sugar utilization	null	RL4253	Rhizobium leguminosarum bv. viciae 3841	15	3	11
5226	Jann_3936	RL4253	Rhodobacterales	Proteobacteria/Alpha	Sugar utilization	null	Jann_3936	Jannaschia sp. CCS1	15	1	4
5268	Rmet_4647	-	Ralstonia	Proteobacteria/Beta	null	null	Rmet_4647	Ralstonia metallidurans CH34	6	2	4
5452	BPSL1304	RSc1790	Burkholderia	Proteobacteria/Beta	Sugar utilization	null	BPSL1304	Burkholderia pseudomallei K96243	8	8	11
5247	PSPTO0485	RSc1790	Pseudomonadaceae	Proteobacteria/Gamma	Sugar utilization	null	PSPTO0485	Pseudomonas syringae pv. tomato str. DC3000	8	1	1
5331	RSc1790	RSc1790	Ralstonia	Proteobacteria/Beta	Sugar utilization	null	RS04189	Ralstonia solanacearum GMI1000	6	5	5
4608	SAG1808	-	Streptococcaceae	Firmicutes	Sugar utilization	null	SAG1808	Streptococcus agalactiae 2603V/R	15	2	3
5412	AAur_4078	SAV1329	Micrococcineae	Actinobacteria	Galactosides utilization	Beta-galactoside	AAur_4078	Arthrobacter aurescens TC1	14	4	21
5285	SAV1329	SAV1329	Streptomycetaceae	Actinobacteria	Galactosides utilization	Beta-galactoside	SAV_1329	Streptomyces avermitilis MA-4680	4	2	4
5316	SCO1956	-	Streptomycetaceae	Actinobacteria	Sugar utilization	null	SCO1956	Streptomyces coelicolor A3(2)	4	2	2
5484	Arth_2426	SCO2753	Micrococcineae	Actinobacteria	Sugar utilization	null	Arth_2426	Arthrobacter sp. FB24	14	5	12
5292	SCO2753	SCO2753	Streptomycetaceae	Actinobacteria	Sugar utilization	-	SCO2753	Streptomyces coelicolor A3(2)	4	4	10
5309	SCO5692	-	Streptomycetaceae	Actinobacteria	Sugar utilization	null	SCO5692	Streptomyces coelicolor A3(2)	4	3	13
5322	ScrR2	ScrR(1)	Bacillales	Firmicutes	Sucrose utilization	Sucrose-6-phosphate	BH1855	Bacillus halodurans C-125	11	3	5
697	ScrR	ScrR(1)	Staphylococcaceae	Firmicutes	Sucrose utilization	Sucrose-6-phosphate	SA1847	Staphylococcus aureus subsp. aureus N315	7	6	16
4613	ScrR2	ScrR(1)	Lactobacillaceae	Firmicutes	Sucrose utilization	Sucrose-6-phosphate	LEUM_0287	Leuconostoc mesenteroides subsp. mesenteroides ATCC 8293	15	1	2
5271	ScrR	ScrR(1)	Clostridia-1	Firmicutes	Sucrose utilization	Sucrose-6-phosphate	Cbei_5011	Clostridium beijerincki NCIMB 8052	8	2	3
5245	ScrR	ScrR(1)	Vibrionales	Proteobacteria/Gamma	Sucrose utilization	Sucrose-6-phosphate	VCA0654	Vibrio cholerae O1 biovar eltor str. N16961	10	1	4
5449	ScrR	ScrR(1)	Ralstonia	Proteobacteria/Beta	Sucrose utilization	Sucrose-6-phosphate	RSp1286	Ralstonia solanacearum GMI1000	6	1	2
5248	ScrR	ScrR(2)	Enterobacteriales	Proteobacteria/Gamma	Sucrose utilization	Sucrose-6-phosphate	Spro_4207	Serratia proteamaculans 568	12	6	16
5260	ScrR	ScrR(2)	Psychromonadaceae/Aeromonadales	Proteobacteria/Gamma	Sucrose utilization	Sucrose-6-phosphate	AHA_2977	Aeromonas hydrophila subsp. hydrophila ATCC 7966	6	3	8
5295	ScrR	ScrR(3)	Alteromonadales	Proteobacteria/Gamma	Sucrose utilization	Sucrose	Patl_3821	Pseudoalteromonas atlantica T6c	9	5	21
621	ScrR	ScrR(3)	Shewanellaceae	Proteobacteria/Gamma	Sucrose utilization	Sucrose	Sfri_3991	Shewanella frigidimarina NCIMB 400	16	5	16
3572	ScrR	ScrR(4)	Streptococcaceae	Firmicutes	Sucrose utilization	Sucrose-6-phosphate	SP_1725	Streptococcus pneumoniae TIGR4	15	13	27
3573	ScrR	ScrR(4)	Lactobacillaceae	Firmicutes	Sucrose utilization	Sucrose-6-phosphate	lp_0188	Lactobacillus plantarum WCFS1	15	9	33
5497	CscR	ScrR(5)	Enterobacteriales	Proteobacteria/Gamma	Sucrose utilization	Sucrose	KPN_03263	Klebsiella pneumoniae subsp. pneumoniae MGH 78578	12	3	10
5383	ScrR	ScrR(5)	Pseudomonadaceae	Proteobacteria/Gamma	Sucrose utilization	Sucrose	PSPTO0884	Pseudomonas syringae pv. tomato str. DC3000	8	3	6
5283	ScrR	-	Bacillales	Firmicutes	Sucrose utilization	Sucrose	BLi04183	Bacillus licheniformis DSM 13	11	4	7
5305	ScrR	-	Bifidobacteriaceae	Actinobacteria	Sucrose utilization	Sucrose	BL0546	Bifidobacterium longum NCC2705	9	6	18
5333	ScrR	-	Burkholderia	Proteobacteria/Beta	Sucrose utilization	Sucrose	BPSS0544	Burkholderia pseudomallei K96243	8	5	20
5752	ScrR	-	Oceanospirillales/Alteromonadales	Proteobacteria/Gamma	Sucrose utilization	Sucrose	Sde_3960	Saccharophagus degradans 2-40	12	1	4
5753	ScrR	-	Sphingomonadales	Proteobacteria/Alpha	Sucrose utilization	Sucrose	Saro_1880	Novosphingobium aromaticivorans DSM 12444	7	2	9
5446	Sde_0506	-	Alteromonadales	Proteobacteria/Gamma	Sugar utilization	null	Patl_2691	Pseudoalteromonas atlantica T6c	9	2	6
5355	SgaR	SgaR	Enterobacteriales	Proteobacteria/Gamma	Ascorbate utilization	Ascorbate-6-phosphate	STM2345	Salmonella typhimurium LT2	12	9	34
5758	SgaR	SgaR	Pasteurellales	Proteobacteria/Gamma	Ascorbate utilization	Ascorbate-6-phosphate	MS0148	Mannheimia succiniciproducens MBEL55E	9	1	4
5296	SgaR	SgaR	Psychromonadaceae/Aeromonadales	Proteobacteria/Gamma	Ascorbate utilization	Ascorbate-6-phosphate	AHA_0174	Aeromonas hydrophila subsp. hydrophila ATCC 7966	6	3	12
5280	SgaR	SgaR	Vibrionales	Proteobacteria/Gamma	Ascorbate utilization	Ascorbate-6-phosphate	VV20859	Vibrio vulnificus CMCP6	10	2	12
5539	SMb20014	-	Rhizobiales	Proteobacteria/Alpha	Sugar utilization	null	Atu4373	Agrobacterium tumefaciens str. C58 (Cereon)	15	4	5
5089	SMb20537	-	Rhizobiales	Proteobacteria/Alpha	Sugar utilization	null	Atu3107	Agrobacterium tumefaciens str. C58 (Cereon)	15	5	10
5090	SMb20667	-	Rhizobiales	Proteobacteria/Alpha	Sugar utilization	null	SMb20667	Sinorhizobium meliloti 1021	15	6	29
5230	SMb20717	SMb20717	Rhizobiales	Proteobacteria/Alpha	Sugar utilization	null	RL4175	Rhizobium leguminosarum bv. viciae 3841	15	4	16
5231	Jann_1459	SMb20717	Rhodobacterales	Proteobacteria/Alpha	Sugar utilization	null	Jann_1459	Jannaschia sp. CCS1	15	4	10
5220	SMb21598	SMb21598	Rhizobiales	Proteobacteria/Alpha	Sugar utilization	null	Atu4364	Agrobacterium tumefaciens str. C58 (Cereon)	15	6	13
5221	OG2516_10476	SMb21598	Rhodobacterales	Proteobacteria/Alpha	Sugar utilization	null	OG2516_10476	Oceanicola granulosus HTCC2516	15	1	4
5222	SMb21706	-	Rhizobiales	Proteobacteria/Alpha	Sugar utilization	null	Atu5078	Agrobacterium tumefaciens str. C58 (Cereon)	15	6	15
5223	SMc04260	-	Rhizobiales	Proteobacteria/Alpha	Sugar utilization	null	Atu1522	Agrobacterium tumefaciens str. C58 (Cereon)	15	6	15
5093	SmoR	SmoR	Rhizobiales	Proteobacteria/Alpha	Mannitol utilization, Sorbitol utilization	Mannitol, Sorbitol	Atu3162	Agrobacterium tumefaciens str. C58 (Cereon)	15	4	9
5092	SmoR	SmoR	Rhodobacterales	Proteobacteria/Alpha	Mannitol utilization, Sorbitol utilization	Sorbitol	Jann_2901	Jannaschia sp. CCS1	15	7	15
5081	SocR	-	Rhizobiales	Proteobacteria/Alpha	Santhopine utilization	Deoxyfructosyl glutamine, Mannopine	Atu5007	Agrobacterium tumefaciens str. C58 (Cereon)	15	3	12
5082	SocR	-	Rhodobacterales	Proteobacteria/Alpha	Santhopine utilization	null	RSP_3939	Rhodobacter sphaeroides 2.4.1	15	1	1
5566	NGR_b22600	SPO0590	Rhizobiales	Proteobacteria/Alpha	Sugar utilization	null	NGR_b22600	Rhizobium sp. NGR234	15	1	4
5565	SPO0590	SPO0590	Rhodobacterales	Proteobacteria/Alpha	Sugar utilization	null	SPO0590	Silicibacter pomeroyi DSS-3	15	5	21
5567	AZL_a08610	SPO0590	Rhodospirillales	Proteobacteria/Alpha	Sugar utilization	null	AZL_a08610	Azospirillum sp. B510	9	1	4
5287	Bphy_4590	SPO0590	Burkholderia	Proteobacteria/Beta	Sugar utilization	null	Bphy_4590	Burkholderia phymatum STM815	8	5	10
5282	STM1555	STM1555	Enterobacteriales	Proteobacteria/Gamma	Sugar utilization	null	plu3733	Photorhabdus luminescens subsp. laumondii TTO1	12	3	4
5311	VF_1255	STM1555	Vibrionales	Proteobacteria/Gamma	Sugar utilization	null	VF_1255	Vibrio fischeri ES114	10	5	5
5303	STM3696	-	Enterobacteriales	Proteobacteria/Gamma	Sugar utilization	null	STM3696	Salmonella typhimurium LT2	12	2	7
5298	SuxR	-	Xanthomonadales	Proteobacteria/Gamma	Sucrose utilization	Sucrose	XAC3487	Xanthomonas axonopodis pv. citri str. 306	4	2	4
5011	ThuR	-	Rhizobiales	Proteobacteria/Alpha	Trehalose utilization	Trehalose	Atu3337	Agrobacterium tumefaciens str. C58 (Cereon)	15	5	18
1158	TreR	TreR(1)	Enterobacteriales	Proteobacteria/Gamma	Trehalose utilization	Trehalose-6-phosphate	b4241	Escherichia coli str. K-12 substr. MG1655	12	8	8
5327	TreR	TreR(1)	Psychromonadaceae/Aeromonadales	Proteobacteria/Gamma	Trehalose utilization	Trehalose-6-phosphate	AHA_3825	Aeromonas hydrophila subsp. hydrophila ATCC 7966	6	4	7
5342	TreR	TreR(1)	Vibrionales	Proteobacteria/Gamma	Trehalose utilization	Trehalose-6-phosphate	VC0909	Vibrio cholerae O1 biovar eltor str. N16961	10	8	13
643	TreR	TreR(2)	Shewanellaceae	Proteobacteria/Gamma	Trehalose utilization	Trehalose	Sfri_3504	Shewanella frigidimarina NCIMB 400	16	2	11
5325	TreR	TreR(2)	Alteromonadales	Proteobacteria/Gamma	Trehalose utilization	Trehalose	Patl_1823	Pseudoalteromonas atlantica T6c	9	3	16
5277	TreR	-	Thermoanaerobacterales	Firmicutes	Trehalose utilization	Trehalose	TTE0803	Thermoanaerobacter tengcongensis MB4	7	3	6
762	UgpR	-	Thermotogales	Thermotogae	Possibly alpha-mannosides utilization	null	TM1856	Thermotoga maritima MSB8	11	7	9
3845	UriR	-	Corynebacteriaceae	Actinobacteria	Pyrimidine utilization	null	cg1547	Corynebacterium glutamicum ATCC 13032	8	2	3
5749	UriR	UriR	Enterococcaceae	Firmicutes	Nucleoside utilization	Pyrimidine nucleoside	EF0172	Enterococcus faecalis V583	2	2	3
5341	UriR	UriR	Listeriaceae	Firmicutes	Nucleoside utilization	Pyrimidine nucleoside	lmo1994	Listeria monocytogenes EGD-e	4	4	4
4644	UxaR	-	Bacteroidaceae	Bacteroidetes	Galacturonate utilization	Galacturonate	BT0824	Bacteroides thetaiotaomicron VPI-5482	11	6	12
4649	UxmR	-	Bacteroidaceae	Bacteroidetes	Mannuronate utilization	Mannuronate	BT3613	Bacteroides thetaiotaomicron VPI-5482	11	6	13
5318	UxuR	-	Bacillales	Firmicutes	Glucuronate utilization	null	BLi02121	Bacillus licheniformis DSM 13	11	3	12
4648	UxuR	-	Bacteroidaceae	Bacteroidetes	Glucuronate utilization	Glucuronate	BT1434	Bacteroides thetaiotaomicron VPI-5482	11	3	3
5496	VCA0673	-	Vibrionales	Proteobacteria/Gamma	null	null	VCA0673	Vibrio cholerae O1 biovar eltor str. N16961	10	4	9
5525	y3436	VP2396	Enterobacteriales	Proteobacteria/Gamma	Sugar utilization	null	y3436	Yersinia pestis KIM	12	1	2
5503	VP2396	VP2396	Vibrionales	Proteobacteria/Gamma	Galactosides utilization	null	VP2396	Vibrio parahaemolyticus RIMD 2210633	10	2	14
5751	VVA0138	-	Vibrionales	Proteobacteria/Gamma	Sugar utilization	null	VV21297	Vibrio vulnificus CMCP6	10	1	6
5249	XCC2209	-	Xanthomonadales	Proteobacteria/Gamma	Sugar utilization	null	XCC2209	Xanthomonas campestris pv. campestris str. ATCC 33913	4	3	22
5266	XCC4129	-	Xanthomonadales	Proteobacteria/Gamma	Sugar utilization	null	XCC4129	Xanthomonas campestris pv. campestris str. ATCC 33913	4	2	2
5755	XltR	XltR	Enterobacteriales	Proteobacteria/Gamma	Sugar utilization	null	y1690	Yersinia pestis KIM	12	1	1
5756	XltR	XltR	Oceanospirillales/Alteromonadales	Proteobacteria/Gamma	Xylitol utilization	Xylitol	HCH_02466	Hahella chejuensis KCTC 2396	12	2	11
646	XltR	XltR	Shewanellaceae	Proteobacteria/Gamma	Xylitol utilization	Xylitol	Shal_2007	Shewanella halifaxensis HAW-EB4	16	2	8
5595	XylR	-	Rhizobiales	Proteobacteria/Alpha	Xylose utilization	Xylose	Atu4481	Agrobacterium tumefaciens str. C58 (Cereon)	15	8	17
5312	YcjW	YcjW	Enterobacteriales	Proteobacteria/Gamma	Sugar utilization	null	b1320	Escherichia coli str. K-12 substr. MG1655	12	2	4
5483	YcjW	YcjW	Listeriaceae	Firmicutes	Sugar utilization	null	lmo2842	Listeria monocytogenes EGD-e	4	3	9
5275	SCO4158	-	Streptomycetaceae	Actinobacteria	Nucleoside utilization	null	SCO4158	Streptomyces coelicolor A3(2)	4	4	12
1Regulog identificators are according to the regulog collections in the RegPrecise database.										1283	7456
2Othologous groups containing a single regulog are indicated by "-".

## Sheet: Studied TFs
Phylum	Taxonomic collection	RegPrecise Regulog id1	RegPrecise regulonId	Regulog name	TF locus tag	Uniprot id	Status Uniprot2	*	Genome name	Genome taxonId	Regulated metabolic pathway	TF effector	Sequence
Actinobacteria	Micrococcineae	5366	52626	AAur_3503	AAur_3503	A1RAD4_ARTAT	U	*	Arthrobacter aurescens TC1	290340	Sugar utilization	null	MARATVQDVARTAGVSVGTVSRVLNGSPAVSDAAKEKVNAAIKELRYRPLASARDLRRDRTMRVLALAKNLDSLVISEVFRGVGDAAADSGYVSLIAATDGDLDREQQLVDMLRNGSVDGLVIFSPAMPDDEVNTVAEQLSVIQVCEIVDAEAAFGVSIDDRQAGYDITKHLINTGAKKLAMLAHRSARSGRLREEGFRQALKESGLEPDQILPCEGNFGYHAGRNLTKKLLEAKSLPDAVFCGTDVVAAGCIRELTDAGLRVPDDIAVTGFDDSAQAEMCVPELTTVRQPAYEMGRVAFAELLERMTLPGAHRRGRTFLPHELVVRDSTKA
Actinobacteria	Micrococcineae	5366	52628	AAur_3503	Arth_3688	A0K193_ARTS2	U		Arthrobacter sp. FB24	290399	Sugar utilization	null	MARATVQDVARTAGVSVGTVSRVLNGSPAVSEASKEKVNAAIRQLSYRPLASARDLRRDRTMRVLALAKNLDSLVISEVFRGVGDAAAESGYVSLIAATSGDLEREQQLVDMLRNGSVDGLVLFSPTMSDQEVDAVAEQMSVVQVCEIVDAEAAFGVSIDDRQAAYDITRHLIDTGGKRLAMLAHRGARSGRLREEGFRQALAESGLAPDRILFGEGNFGFHSGRALARKLLEAGDLPDAVFCGTDIVAAGCVRELTDAGLRVPGDIAVAGFDDSAQAEMCVPELTTVRQPAYEMGRVAFAELLERMTVPGAHRRGRTFLPHELVVRDSTKG
Firmicutes	Bacillales	5732	56158	ABC1167	ABC1167	Q5WIV0_BACSK	U	*	Bacillus clausii KSM-K16	66692	Sugar utilization	null	MATKKATSMDVAKLAGVSQSSVSRAFGHGANVSAEKHKRIMEAAAKLGYSPNAIARGLITRKTNMIGIVMRNIKNPFYPEVLEKFYQALFEKGYHILFINAENEKINEDEVVKLIEYNVDGVIITDATPTLNAIERFMSNGIAVVLFNRYVDTKQCSAVYCNNYQAGYDIGQLILNKGFTNIAFVSGPMDTSTTRDRLIGLKDSLQTTSVSFREESGHYTYEGGYVAALQLTESNRPDVIVCGNDIMAFGVIDGVKKRGLRIPEDIAIIGFDDVSMASWPSYALTTWKQPIDDMVNETVALICEEIDSEETQTVHMAIDGQLIIRETFR
Proteobacteria/Alpha	Rhizobiales	5219	51448	AduR	Atu4420	Q7CUW8_AGRT5	U		Agrobacterium tumefaciens str. C58 (Cereon)	176299	Adenosine utilization	Adenosine	MASSRPATNLSAIAAALGVSVATVSNALSGKGRVSPDLVERIRKTASELGYVPSSAGRALRTGRSGVLGLVLPDIANPLFPQIAQAIEKAAVSAGYGVLIADARGEIAMQTDAINRLIERGVDGMIIVPRRGTRISGVDCPVAIIDSPSTPGNTVAADHWDGGRQVGDYLASLGHRKVVLVGKNRDSNVQNDRLGGIRDGLGKACVTRTLWIDSIEEADGAGCRLGLADLVADGFTAFAAISDLHALRALTELQREGIEVPEEASVTGFDDLIFSAVVTPPLTTMRMDMGRIADLAVGALLRAIDSAGDNGVAIDVTAEISKVPMALIMRGSTGKTKHDAIEAKKTTAGELTP
Proteobacteria/Alpha	Rhizobiales	5219	51457	AduR	RHE_CH03414	Q2K4R5_RHIEC	U		Rhizobium etli CFN 42	347834	Adenosine utilization	Adenosine	MASSRSGPNLSRIATSLGVSIATVSNALSGKGRVSGQLVERIREHAAELGYVPSQAGRALRTGRSGVLGLVLADIANPLFPKIAQAIEFAASTAGYGVLIADSRGDAAAQTDAINRLVERGVDGMVIIPRRATRISSAACPVALIDTPSTPGNTVSADHWQGGREIGVHLADLGHQRILIIGNNQESSVQNDRADGIRAGMDAGMHSETLWIGKVEQDGGSGCPLGLAEKVREGFTAFAALSDLQALRALTELQQAGISVPGDVSVTGFDDLIWSPVVTPSLTTVRMDMDRIAGIAVSALADTIRKSHAREGVLVTAEIERVAMQLIVRQSSGPASPAPKTSEMENM
Proteobacteria/Alpha	Rhizobiales	5219	51458	AduR	RL3877	Q1MCG4_RHIL3	U	*	Rhizobium leguminosarum bv. viciae 3841	216596	Adenosine utilization	Adenosine	MPASRPGPNLSRIATSLGVSAATVSNALSGKGRVSGQLVERIREHAAELGYVPSQAGRALRTGRSGVLGLVLPDIANPLFPKIAQAIEFAASAAGYGVLIADSRGDVAAQTEAINRLVERGVDGMVVIPRRATRISSAACPVAVIDTPSTPGNTVAADHWQGGREIAGHLAGLGHRRILIIGNNRESNVQNDRAGGIRSGMRAGMHSATLWIDRLEQENGSGCPLGLAEKVRQGFTAFAALSDLQALRALTELQQAGINIPTDVSVTGFDDLIWSPVVTPSLTTVRMDMERIAGIAVSALVDTIRTSSIREGVLVTAEIERVAMQLIVRQSSGPANPAPRTSEMENM
Proteobacteria/Alpha	Rhizobiales	5219	51461	AduR	SMb21272	Q92VD1_RHIME	U		Sinorhizobium meliloti 1021	266834	Adenosine utilization	Adenosine	MARSGPKLTRIATALGVSAATVSNALSGKGRVSAELAEKIRSVAAEIGYVPSQAGRALRTGKSAVIGLVLPDISNPLFPQIAQAIEFAASSAGYGVLIADSRGDVAVQTRAIERLIERGVDGMVIVPRRGTRIADVGCPVAVVDTPSTPGNTVAADHWDGGRQIAEHLVGLGHRRLLILGNNPASNVQNDRIGGLRSAMREGAQAETLWIERLEQVHGKGCSLGLAGKVAEGVTAFAAVSDLQALRALTELQRAGIHVPEQASVTGFDDLIWSPVVTPALTTIRMDMARIATLAVEALVQAIGAGEAEFPSHGRPVAATISKVPMQLVVRQSTATPPSNVQPAPNVKPPSEGEPQS
Proteobacteria/Alpha	Rhizobiales	5550	54339	AfrR	BMEI0019	Q8YJR3_BRUME	U		Brucella melitensis 16M	224914	1,5-Anhydro-d-Fructose utilization	null	MGLDSLGTFQLNRRSKPEQIMSKGSVTVIDIAREAGVSKSTVSLVLRDSPLVHAETRAKVQEAIEKLGYVYNRSAANLRQAKSKIIGLVVNDLTNSFFAELAVGVDRVMQSAGYVQFLANTAESIDRQREVIASMREHGIAGLIVSPARGTEASDLKPLAKSGLPVVQMVRDVPGSGVSSIVSDNRGGVAKAVEHLVSLGHRAIAFMGGYADIAVFSERLAGYRTGLEQAGIAFDEALVFTSAPSRAGGVEALEQMLRQGMKPTAAVCFNDAVAFGVCDGLRATHLEPGRDFGVVGFDDVIEAKTAVPALTTVAVDPQGLGERAAQLLLKQINSERVEAEAQRLSVRLAVRASCGAPFRKPEEKFEWQSGAL
Proteobacteria/Alpha	Rhizobiales	5550	54340	AfrR	mlr3045	Q98H38_RHILO	U		Mesorhizobium loti MAFF303099	266835	1,5-Anhydro-d-Fructose utilization	null	MASRAKATIFDIAREAGVSKSTVSLVLQGSGLIRPETAVKVRKAIEDVGYVYNRGAANLRKAHSNVIGMVINDLTNPFFAELAVGMERVFQSAGIVPFIANTAENPVRQEEVLKSLMEQGVAGLIVSPARGTTPGAFRRLELAGVPVVFAMRRLPESRIPVIAPDNHRGAYLAAAHLIAKGHRRLAFFGGTSDLVVYQERLGGFREACETLGIAARDVLVVEGETNRRGGLACLETALTMAEPPTAALCFNDAVAFGVMLALRKRRLEPGPDFAVVGFDDVVEAEHYMPALTSVAVDTAGLGERAAHVMLKLIQSRTTRAEDHIGAVNLVVRESCGPDLRTRNRLAGTGGAA
Proteobacteria/Alpha	Rhizobiales	5550	54343	AfrR	RHE_CH01719	Q2K9H2_RHIEC	U		Rhizobium etli CFN 42	347834	1,5-Anhydro-d-Fructose utilization	null	MTKARVTVIDIAKAAGVSKSTVSLVLQGSSLVNEATRAKVNAVMRELGYVYNRGAANLRQAGSKSRIIGVVVNDLTNSFFAELAVGVDTVVQSAGFVQFLSNTGESIDRQREVVASMREHGISGLIVSPARATDAADFKPLVAAGIPVVVVVRNLPGAKVSSIVSDNRAGMISAVQHLVGLGHKRIAFLGGFPDTAVFDDRLAGYRSGTEAAGLSYDEALVISSAPSRAGGVEAIGKAIAVGDRPTAAVCFNDAVAFGVCDGLRARRLEPGADFAVVGFDDVIEAQAAVPALTTVSVDPQGIGRRGAQMLLKQINAGKAEAETVTTAVRLVVRESCGAGTASPARAGRAVN
Proteobacteria/Alpha	Rhizobiales	5550	54344	AfrR	RL1820	Q1MI95_RHIL3	U	*	Rhizobium leguminosarum bv. viciae 3841	216596	1,5-Anhydro-d-Fructose utilization	null	MTKARVTVIDIAKAAGVSKSTVSLVLQSSSLVNEGTRAKVNAVMRELGYVYNRGAANLRQAGAKSRIIGVVVNDLTNSFFAELAVGVDMVVQSAGFVQFLSNTSESIDRQREVVASMREHGISGLIVSPARATDATDFKPLVAAGIPVVVVVRNLPGAKVSSIVSDNRAGMMSAVKHLAELGHKRIAFLGGFPDTAVFDDRLAGYRSGMEAAGLDYHQELVISSAPSRAGGVEAIGKALVLADRPTAAVCFNDAVAFGVCDGLRARRLEPGADFAVVGFDDVIEAQAAVPALTTVSVDPQGIGRRAAQMLLKQINAGKAEAETVTTAVRLVVRESCGAGMRVKIKQDFA
Proteobacteria/Alpha	Rhizobiales	5550	54345	AfrR	NGR_c33000	C3MAN7_RHISN	U		Rhizobium sp. NGR234	394	1,5-Anhydro-d-Fructose utilization	null	MAKERVTVVDIARAAGVSKSTVSLVLQGSALVNEATRAKVNAAIRELGYVYNRSAANLRQARSKIIGIVVNDLTNSFFAELAVGVDAVVQSAGFVQFLANTSEKSERQREVIASMREHGVSGLIISPARGTEAADLAPLVASGIPVVLVVRDIAEAGVSSLTSDNHAGAMAAVRHLIERGHRRIAFLGGFPDTAVFEARMRGYRDALREAGMPALDELVIGSAPSRAGGVTAIEQAMMLKDRPSAALCFNDAVAFGVCDGLRARRLEPGADFAVIGFDDVIEAKTAVPALTTVSVDPQGMGERAAELLLKQIQAGRAEPEAIVSPVRLVVRQSCGGTVERRVKEISS
Proteobacteria/Alpha	Rhizobiales	5550	54347	AfrR	SMc04401	Q92KZ2_RHIME	U		Sinorhizobium meliloti 1021	266834	1,5-Anhydro-d-Fructose utilization	null	MGKERVTVVDIARAAGVSKSTVSLVLQASPLVNESTRAKVNAVIRELGYVYNRSAANLRQARSKIIGIVVNDLTNSFFAELAVGVDEVVQTAGFVQFLANTSEKLDRQREVIASMREHGVSGLIISPARGTEAADLAPLVAAGIPVVLVVRDIPGAGVSSLTSDNHAGAVAAVRHLVERGHRRVAFLGGFADTAVFEARMRGYGDALREAGLEVSDDLIIGSAPSRAGGVTAIEQAMMLKERPTAALCFNDAVAFGVCDGLRARRLEPGEDFAVIGFDDVIEAKTAVPALTTVSVDPQGMGERAAELLLKQINSGRVEPEAIVSPVRLAIRQSCGAAVGRRVKEISS
Proteobacteria/Alpha	Rhodobacterales	5551	54350	AfrR	Jann_3927	Q28KB8_JANSC	U	*	Jannaschia sp. CCS1	290400	1,5-Anhydro-d-Fructose utilization	null	MTRRPTILDVAARAGVSKSTVSLVLQNSKQVKAETREAVRAAMADIGYVYNRAAAQMRSQSAGLVGLVINDLRNPFFTEFATVLQMTLAAKGYATVIANSDEDADLQAKLMGSMIEHGVSALVVSPAYDDGGDAFDQVERAGIPAMQVLRKTDPRTGLFPFASFDYASGSAKATRHLMNQGATRIAFVGGMEGRAITEERKSGYLAEIKRAGAEPFVLHGRSSRAFGLEAAMALPMDVDAAICFNDLVALGMLSGFAREGVELGRDFRLVGFDDIEDCAQVWPQVSSVACDISGFAQGIADGLLAWMQDGVTPPPEHRAPVHLVARTSSTGRNP
Proteobacteria/Alpha	Rhizobiales	5008	49431	AglR	Atu0590	Q7D157_AGRT5	U		Agrobacterium tumefaciens str. C58 (Cereon)	176299	Alpha-glucosides utilization	Alpha-glucoside	MNLKQLSQLLGISQTTISRALNGYPEVSAETRRRVMEAAEKTGYRPNAAAQRLATGKVGSIGLVMPIGEHHRSDVHFGEFLSGLGEEASRSGFHLVIMPTEPENERDALRGLAASGSVDGIYLAYMKNNDPRIAMMQSLSLPFLVHGRSVGVEEDYPYLDVDNEGAFHDATQLLLQLGHTRIGLLNGPEGYDFTYRRCLGVEKALAANGLSLHPDNKRHSSMTDEEGYLGMEALLSRPEKPTAILCASTALALGAIRSLNQRGLKPGRDISLIAHDDVLPLLKPDNFSVPLTTTRSSLRAAGVRVGQRLINRIKLNQTEPHQELWKAELVVRASTGPAPKA
Proteobacteria/Alpha	Rhizobiales	5008	49435	AglR	mlr5115	Q98CK2_RHILO	U		Mesorhizobium loti MAFF303099	266835	Alpha-glucosides utilization	Alpha-glucoside	METIVNLKQLAQMLALSQTTVSRALNGYPEVNEETRRRVVDAAKRHGYRPNPSARRLATGKSGMIGYVLPTGAAVDIDPHFVEFLSGLGDYARSHELDLVLSPADADDQETTYRRIVANRQVDAVYISSPRPQDSRVAQVSTLGIPFLVHGRSEGFDFDYPYLDIDNEAAFHEAARLLVQLGHRRLALINGDDRETFAIHRERGVRRALAASGLSLRERHVCSVVMTEENGYRATRRLLEEGDAPTAIACSSLIMALGVVRAVRDLGLTIPGDVSLIAHDDVFPWLKPENFSVPLSTTRSSIRLAGARVAERLAARISGLEEGARGEVWPVDLVVRGSVAGAPA
Proteobacteria/Alpha	Rhizobiales	5008	49439	AglR	Meso_2854	Q11EE5_MESSB	U		Mesorhizobium sp. BNC1	266779	Alpha-glucosides utilization	Alpha-glucoside	MQRGAGLIYPSFPTNNVQSALNEVALARETITLRRLAEVLGLSQTTVSRALNGFPEVNEATRARVIEAAQRLNYRPSASAASLATGKARTIGHVVTLGDHMMINPHFTDFVAGAGEVYARFGYEMLLRITGSEGEQDVYRDLISRRRVDGVVVHGPKTRDPRIPFLRKLGIPFVVHGRCEEDPASYSWIDVNNRRAFMRACNFLIDLGHRRIGLINGIETMNFADRRRQGYEAALAARGIDLDTSIMFSADMIEPHGYRAAAQMLSSRKPPTAVLVSSILPAIGVMRALAERELRPATDLSIIVFDDCLSFLQPGNEAVSGAIPFFTAMRSSMRLAGRRVAELLIEQIEGQHSAPKHELWEAELVIGHTTGPCAPAESQVPVRVKPFRRYS
Proteobacteria/Alpha	Rhizobiales	5008	49432	AglR	RHE_CH00695	Q2KCC5_RHIEC	U		Rhizobium etli CFN 42	347834	Alpha-glucosides utilization	Alpha-glucoside	MNLKQLSELLGLSQTTVSRALNGYPEVNEATRERVLQAVKETGYRPNKAAQRLATGKAGSIGLVMPTAPGHQSDVHFGEFLAGLGEEAVRHDFHFVIMPSDPDDEVAALRRLAISGNVDALFIAYMRGHDPRLAMLKSLSMPYVVHGRSFGAELDYPYLDIDNEGAFYDATRLLLQLGHTRFALMNGPMHLDFAIRRRNGVISALAERGLTLEEDCMSHALMTDEQGLLAMERFLQLPERPTAILCSSTVMALGAIRAVNQAGLRLGEDVSLIAHDDVLPLLKPENFSVPLTTTRSSLRAAGVRIAQRLIGTVKQAGPFPEQELWKTELIVRASTGPAPQQS
Proteobacteria/Alpha	Rhizobiales	5008	49433	AglR	RL0744	Q1MLB5_RHIL3	U	*	Rhizobium leguminosarum bv. viciae 3841	216596	Alpha-glucosides utilization	Alpha-glucoside	MNLKQLSELLGLSQTTVSRALNGYPEVNEATRERVLQAVKETGYRPNKAAQRLATGKAGSIGLVMPTAPGHQSDVHFGEFLAGLGEEAVRHDFHFVIMPADPDDEVAALRRLAISGNVDALFVAYMRGHDPRLAMLKSLSMPYVVHGRSFGSEPDYPYLDIDNEGAFYDATRLLLQLGHTRFALMNGPMHLDFAIRRKNGVISALAERGLTLEDGCTSHALMTDEQGLLAMEHFLQLPERPTAILCSSTVLALGAIRAVNQAGLRLGEDISLIAHDDVLPLLKPESFSVPLTTTRSSLRAAGVRIAQRLIGTVKQAGPFPDQELWKTELIVRASTGPVPQA
Proteobacteria/Alpha	Rhizobiales	5008	49440	AglR	NGR_c03090	C3MGJ2_RHISN	U		Rhizobium sp. NGR234	394	Alpha-glucosides utilization	Alpha-glucoside	MAVNLKQLAEILGLSQTTVSRALNGYPEVNAETRQRVLQAVRETGYRPNRAAQRLATGKAYSIGLVMPIAPGIDSDIHFGEFLAGLAEESVKHDFHFVINPSAPDDEEATFRRLAASGNVDAVFLAYMRANDPRIPMLKALSIPFVVHGRSIGGPRDYPFLDIDNTQAFYDATKLLLQLGHHRIGLINGPDYLAFSMRRKKGVTRALEEWGLGLDEELVHHSVMADEYGYRSMQHFLERPDPPTAVLCSSTVLALGAVRAINRAGLVLGSDISIIAHDDVLPMLKPENFSVPLTTTRSSLRAAGARIATRLIGGIVGRGDYPEQELWRAELIVRASTGPAPGR
Proteobacteria/Alpha	Rhizobiales	5008	49434	AglR	SMc03060	AGLR_RHIME	R		Sinorhizobium meliloti 1021	266834	Alpha-glucosides utilization	Alpha-glucoside	MPVNLKQLAELLGLSQTTVSRALNGYPEVNAETRARVLEAVRETGYRPNRAAQRLATGKAYSIGLVMPIAAGIDSDIHFGEFLAGLAEEAVEHDFHFVLNPSAPEDEEATFRRLAASGNVDAVFIAYMRANDPRIEMLKALSIPFVVHGRSIGGPRDYPFVDVDNTGAFYDAARLLIQLGHNRIALINGPEHLTFSIRRRKGLVRALAEKGLNLDDALVHHSAMTDEHGYRSMQRFLKRPAPPTAVLCSSTVLALGAVRAINQAGLAIGTDISLIAHDDVLPMLKPENFSVPLTTTRSSLRAAGARIAKRLIGGILNQGDYPEQELWRAELIVRASTGPAPDRSPLPNPSPQVGGA
Proteobacteria/Alpha	Rhodobacterales	5009	49448	AglR	Jann_1945	Q28R00_JANSC	U	*	Jannaschia sp. CCS1	290400	Alpha-glucosides utilization	Alpha-glucoside	MNLRELSESLGLSQTTVSRALNGYPEVREATRLRVQKAAEAANYLPNSRARRLATGRAMAIGHVMPLNGREELVNPIFADFIAGAGEVYGKDGFDLHLSMVPADCTEAAYRQMAANASVDAVMVQAPTLDDARVPLLKDLGLPFLIHGRTADPQGYSWLDVANVRAFRRATDLLLDLGHRRIALLNGQETLDFALRRRRGFEEALTARGLTPRPDFLHSDVMTEQYGYRTARALLDRDDAPTAFVVSSIIPAIGVRRAAGERGLRTGHDISIICHDDVLSYIDNDGMNAPEGPAFTATRSSIRAAGRRCAEILLSLIDDPDQPHIQEIWETDLTLGRSTGPAPT
Proteobacteria/Alpha	Rhodobacterales	5009	49452	AglR	SKA53_03274	A3V9E8_9RHOB	U		Loktanella vestfoldensis SKA53	314232	Alpha-glucosides utilization	Alpha-glucoside	MARWQIVLLKLHRQFESALKDTDRMNLKQLSQKLGLSQTTVSRALNGYPEVNEATRMRVERAAAQYHYRPSTRAKGLATGKALAIGHVIPISSKHEMVNPIFGDFIAGAGETYARHGYEMILCTADDGQEEQVYRGLKARRAVDGVVVHGPRLDDSRIRLLHDIGLPFVVHGRSSGATLPYAWLDVNNRHAFQRATDFLLDLGHLRIGLINGMEFMDFAHRRRDGYTIALLARGVPVDPSIMRSSEMTEDFGYQSTRDMLALGDPPTALLCASLISALGARRAVEEAGLIMGRDVSIITHDDDLSYLKNGGDIPIFTATRSSVRAAGARLAEILLGGIADPELLHQNVLLEAELMVGRSTGPAPRKD
Proteobacteria/Alpha	Rhodobacterales	5009	49450	AglR	OG2516_02414	Q2CHP1_9RHOB	U		Oceanicola granulosus HTCC2516	314256	Alpha-glucosides utilization	Alpha-glucoside	MNLKQLAEALGLSQTTVSRALNGYPEVSEATRRRVVEAAAQHGYSPNARAKGLATGQAMAIGLVIPVSDQQEMVNPVFGDFLAGAGEACSALGYEMVLSVVEGDEAAVYRSMKARGSVDGVVVSAPRLGDPRPALLDGLGLPFLVHGRISGYEAPYSWIDVNSRSAFRRAAGFLLDLGHRRVGLVNGEEIFDFAHRRRRGYGEALAERGLPETADLVVQGEMTEDFGHDSARAMLARPDPPTAFLVSSLICALGVRRAVEELGLVMGRDVSIVTHDDALSYFQNGGDVPIFTAVRSSVREAGRRAARLLIGRIETPGAPHAQDLLEAQLLVGESTGPAPRARKTAP
Proteobacteria/Alpha	Rhodobacterales	5009	49449	AglR	RB2654_03744	A3VMT1_9RHOB	U		Rhodobacterales bacterium HTCC2654	314271	Alpha-glucosides utilization	Alpha-glucoside	MKAMTLKELAKALSLSPTTVSRALNGFPEVSEATRKRVQAAADAYGYRPNMRARSLATGRAMAIGHVIPLASEHEMVNPVFADFIAGAGEVYSKSGYDMLISIVPEAEQERAYEEFKHKASVDGIIVHAPRSGDQRIKLLKAVGIPFVVHGRASKSDEAYSWVDMNNLRAFQRATNFLLDLGHRRIALINGLEDMDFAIRRRAGFEAAHEERGITHDESLMFSGEMTEKFGHDTTAALLARPDAPTAIITSSMIPAIGIRRAIREANLEMGRDVSVIIHDDDLSYLPNGRDDPIFTATRSSVREAGRRAATMLLDIIANGSDTPRTSLMEAELLIGQSTGPAPAHARTTDPV
Proteobacteria/Alpha	Rhodobacterales	5009	49456	AglR	TM1040_3308	Q1GM36_RUEST	U		Silicibacter TM1040	292414	Alpha-glucosides utilization	Alpha-glucoside	MNLKELSAVLGLSQTTVSRALNGYPEVSEATRKRVMQAAQDHNYRPNTRAKALATGRAMAIGHVIPLSTQHEMMNPIFSDFIAGAGESYSQAGYDMVLSLVADEDQSRAYHEMAAKRNVDGIVLHAPKMRDSRITMLQEIGLPFAVHGRATDISRPYSWLDVNNTSAFRRATDFLLDLGHRRICLVNGQESMDFAHRRRQGYEAALQARGIPVDPALMTAGEMTEVYGYDTVQRTQALEDPPTAYLVSSIIAAFGVRRAIEESGLKMGRDISVITHDDDLSYLRNGADVPVFTATRSSVRDAGRRLAKLLISQIEDPGDAPLTELLEAELTVGRSTGPAPNRTSKT
Firmicutes	Listeriaceae	5482	53578	AlsR	lmo0734	Q8Y908_LISMO	U	*	Listeria monocytogenes EGD-e	169963	Allose utilization	Allose-6-phosphate	MKKTSIKDIAKLSGVSVATVSRVINDNGRFSEETREKVLAVIKETNYQMNFSAKSLRMNKSFSVGILVPDISNYFFSSVVQQIEAILFDQGYSTIICNTGRNLDKEMAYLNMLESKMVDGLIVISGADEFGFKYTNAENGIPYVCIDRQPKDKKDTIFISSNHYQGAFEATEALIHAGVKSPVIFMHSRQSSSAKERLKGFQDALKKNNIRYDPDVSKFTVDLQIHDYQKSIITFVNEVTTMDGIFAINDNIALELLNLLPTIGKKIPNDIKVIGFDDTPQCNYTVPKLSSVKQNIPKIAQITVDNLITIIKNPKQKKRITEIVPVELSLKDSI
Firmicutes	Listeriaceae	5482	53580	AlsR	lwe0703	A0AGI9_LISW6	U		Listeria welshimeri serovar 6b str. SLCC5334	386043	Allose utilization	Allose-6-phosphate	MKKTSIKDIAKLSGVSVATVSRVINDNGRFSEETRQKVLAVIKETNYQMNFSAKSLRMNKSFSVGILVPDISNYFFSSVVQQMEAILFEQGYSTIICNTGRNLDKELAYLNMLESKMVDGLIVISGADEFGFNYSNAENGIPYVCIDRQPKDKKDTIFISSNHYQGAFEATEALIHAGAKSPVIFMHSRQSSSAKERLKGFQDALKKNNIQMNPELSIFTMDLQKPDYQKNIATFVQKAKKIDGIFAINDHIAIELLNFLPTIGKKIPDDIKLIGFDDTPQCNYTVPKLSSVKQNIPEIAQITVDNLISIIKNPEQQKQITEIVPVELSLRGSI
Firmicutes	Streptococcaceae	4607	44498	AlsR	LACR_1640	Q02Y35_LACLS	U	*	Lactococcus lactis subsp. cremoris SK11	272622	Allose utilization	Allose-6-phosphate	MKKTSIKDIAKLSGVSVATVSRVINNNGRFSEETRKKILDVIEETGYQMNFSAKSLRMNKSFSVGILVPDISNYFFSDMVQKIEEELFELGYSTIICNTGRNIEKETAYLNMLRSKLVDGIIVISGVDEFVFHYDDIPYICIDREPLKKEKTIFISSNHYQGAFEATESLINNGCKHPAILMYDRQSSSAKERFKGYKDALKKNNISYNESSHLLLSGLEENFTENLQAFLERTDQVDSFFAVNDTLAMKLFSSLKELGEKIPEDFKIIGFDDSPLAHYSSPTLSSVKQNTDKIAQFTVKNLIDFISSGKIINYQTILVPVELVVRNSSLNN
Proteobacteria/Gamma	Enterobacteriales	1132	10317	AscG	CKO_04069	A8ANS2_CITK8	U		Citrobacter koseri ATCC BAA-895	290338	Beta-glucosides utilization, Cellobiose utilization	Beta-glucoside-6-phosphate, Cellobiose-6-phosphate	MSNMTTMLEVAKRAGVSKATVSRVLSGNGYVSQETKDRVFQAIEESGYRPNLLARSLAAKKTQTLGLVVTNTLYHGVYFSELLFHTARMAEDKGRQLLLADGKHSAEEERQAIQYLLDLRCDAIMIYPRFLSVDEIDDIIDSHAQPIMVLNRRLRRNSSHCVYCDQKQTSFNAVEQLIAGGHREIAFITGSMDSPTGVERLSGYKDALTRHGIAINNELIVNGKWTPASGAEGVDTLLARKVSFTALVASNDDMAIGAIKQLHERGMSVPAQTSVIGFDDIAMAPYTIPALSSVKIPVTEMIQETIGRLIFMLDGGEFTPPKTFTGALILRDSAAPLPAR
Proteobacteria/Gamma	Enterobacteriales	1132	10319	AscG	Ent638_3187	A4WDS1_ENT38	U		Enterobacter sp. 638	399742	Beta-glucosides utilization, Cellobiose utilization	Beta-glucoside-6-phosphate, Cellobiose-6-phosphate	MTTMLEVAKRAGVSKATVSRVLSGNGYVSQETKDRVFQAIEESGYRPNLLARNLATKRTQTLGLVVTNTLYHGVYFSELLFHAARMTEEKGRQLILADGKHSADEEREAIQYLLDMRCDAIIIYPRFLSVEEMDDIIQKHEQPIMVLNRRLRKNSSHCVWSDHKASCQAAVSQLIDMGHRDIAFITGSLDSPTGIERLSGYKDALAQHHIPLNDALIVEGKWNPESGAAGVSTLLSRGETFTALVASNDDMAIGAVKQLHDSGIATPGQVSVIGFDDVAIAPYIIPSLSSVRIPVTEMIKETISRLIFMLDGGDFTLQQTFSGELILRDSVIAGPHV
Proteobacteria/Gamma	Enterobacteriales	1132	10320	AscG	EAM_2929	D4IAZ7_ERWAE	U		Erwinia amylovora ATCC 49946	716540	Beta-glucosides utilization, Cellobiose utilization	Beta-glucoside-6-phosphate, Cellobiose-6-phosphate	MMITMLDVAKKAGVSKATVSRVLAGNNYVSKTTQERVFKAIKETGYRPNLLARNLATSKSQNIGLVVTNTLYNGPYFSELLFQAATMTEQHGRQLLLADGKHDARQERQAIEFLLDLRCDAIIIYPRFLNTAELDDIIARTSKPIIVVNRQLEKHPAHCVIAAHEKNSFEAVNHLVAQGHRDIAFIRGASGSPTGLSRFNGYLKALRAHHIVPDEQRVTKGEWTLQSGYAAAQELLARGAQFTALVASNDDMAIGAARALHRAGKRIPQDVSLLSFDDIPMASFFEPPLTTVHVPVGEMIQHTLDKLVLMLDGQSSEPLSAIEGRLMIRDSVAPGPWRDRE
Proteobacteria/Gamma	Enterobacteriales	1132	10321	AscG	ECA2164	Q6D576_PECAS	U		Erwinia carotovora subsp. atroseptica SCRI1043	218491	Beta-glucosides utilization, Cellobiose utilization	Beta-glucoside-6-phosphate, Cellobiose-6-phosphate	MEVLNVSGCPMSTMQEVAKKAGVSKATVSRVLSGKGYTSEETKTLVYQAIEETGYQPNLLARNLATSKSACIGLVVTNTLYHGSYFNELLSQAAKKLEDNGRQLILVDGKHSAAEERDAIQFLLGLRCDAIIIYPRFLNVDEMDDIIEKHKQPIMVVNRKLRKHQSHCICCDHKGSSYNATQHLIARGHKDIAFITGSLDSPTAIERLSGYKDALKAANIAVRDELIVRGKWTPRCGSLAITTLRDSQVSFSAVLASNDDMAIGAIKALDEAGVAVPNDVSVVGFDDIPTAPFLKPSLSSVKDPVSDMINEVINRLIAMLDGGYFSKENLFLSELRVRDSIQDGPYG
Proteobacteria/Gamma	Enterobacteriales	1132	10321	AscG	ECA4436	Q6CYR9_PECAS	U		Erwinia carotovora subsp. atroseptica SCRI1043	218491	Beta-glucosides utilization, Cellobiose utilization	Beta-glucoside-6-phosphate, Cellobiose-6-phosphate	MATMLDVAKKAGVSKATVSRVLTGNNYVSKTTRDRVFQAIEEIGYRPNLLARQLATSKSQIIGLVVTNTLYSGPYFSELLFQTATMTEKYGRQLIMADGKHSAEEEREAIQFLLDLRCDAVIIYPRFLSIEALESIIEQHEQPIMVVNRTLHQHSDNGICADHQQHCHDAVNYLITQGHRDIAFICGSSNSPTGTSRLAGYRQALVDNGIPCDDRLIAQGDWTHDSGYTAAKSLLQRTLTFSALVASNDDMAIGAAKALREHGLAIPQDVSLLGFDDLPMASWFYPPLTTVHVPVAEMINYTLEKLLCRLEGETVIPAPAFKGTLIIRDSVSKGPQSGILSRDTV
Proteobacteria/Gamma	Enterobacteriales	1132	10322	AscG	b2714	ASCG_ECOLI	R	*	Escherichia coli str. K-12 substr. MG1655	511145	Beta-glucosides utilization, Cellobiose utilization	Beta-glucoside-6-phosphate, Cellobiose-6-phosphate	MMTTMLEVAKRAGVSKATVSRVLSGNGYVSQETKDRVFQAVEESGYRPNLLARNLSAKSTQTLGLVVTNTLYHGIYFSELLFHAARMAEEKGRQLLLADGKHSAEEERQAIQYLLDLRCDAIMIYPRFLSVDEIDDIIDAHSQPIMVLNRRLRKNSSHSVWCDHKQTSFNAVAELINAGHQEIAFLTGSMDSPTSIERLAGYKDALAQHGIALNEKLIANGKWTPASGAEGVEMLLERGAKFSALVASNDDMAIGAMKALHERGVAVPEQVSVIGFDDIAIAPYTVPALSSVKIPVTEMIQEIIGRLIFMLDGGDFSPPKTFSGKLIRRDSLIAPSR
Proteobacteria/Gamma	Enterobacteriales	1132	10323	AscG	KPN_03050	A6TCY0_KLEP7	U		Klebsiella pneumoniae subsp. pneumoniae MGH 78578	272620	Beta-glucosides utilization, Cellobiose utilization	Beta-glucoside-6-phosphate, Cellobiose-6-phosphate	MATMLEVAKRAGVSKATVSRVLSGNGYVSQETKDRVFKAVAESGYRPNLLARNLATKTTQTLGLVVTNTLYHGVYFSELLYHVARMTEDKGRQLILADGKHSAQEEREAIQYLLDLRCDAIIIYPRFLTVDEMDEIVENHSQPIMVLNRRLRRHASHCVWSDQKASAMRVVERLIALGHRDIAFITGSLDSPTGVERLAGYKDALAGHGIALNEALIAEGRWTPETGAAGVESLRQRGVTYSALVASNDDMAIGAMKQLHQLGVKVPEQVSVVGFDDIALAPYMVPSLASVRVPVTEMIKESINRLIFMLDGGEFNFQQSFPGALIERESLVAGPCA
Proteobacteria/Gamma	Enterobacteriales	1132	10327	AscG	Spro_0577	A8G993_SERP5	U		Serratia proteamaculans 568	399741	Beta-glucosides utilization, Cellobiose utilization	Beta-glucoside-6-phosphate, Cellobiose-6-phosphate	MATILEVANRAGVSKATVSRVLSGSGYVSPEKRERVDKAIAETGYRPNLLARNLATKTTQTIGLVVTNTLYSGNYFSELMFQSARIMEEHGRQLILADGKHTAAEEKAAIEYLLDMRCDGVIIYPRFLSISEMDEIISRHKQPILVINRRLRLNDSYCIFSDQHAASVTAVQQLIERGHRDIAFITGSLDSPTGLERLSGYKSALAEHDIGVKDALIVEGKWNAQSGMAAVDKLLAGGHAFSAIVASNDEMAIGAIKRLTECQIPVPSAVSVIGFDDIPLAPYTIPSLSSVKMPVSEMIKETIHRLVSMLDGGELSKRPSFPASLMLRDSVAAGPYWLAEKARG
Proteobacteria/Beta	Burkholderia	5307	52151	Bamb_2736	Bamb_2736	Q0BC31_BURCM	U	*	Burkholderia cepacia AMMD	339670	Sugar utilization	null	MATNNMETTMTDPSGPRWRKRTARFDEIAALAGVSTTTVDRVLNERGSVSAQARERVVAAARKLGVPRQLPDTRHGLLHVDVLLPDTDAPFFRRLQQALQRSLQMLDRRVVVHRTILPAADDERAAALIERPAYRRAALIVTARDTPRVRDALAGAIARGETVVTMVTDIGGGARVHYAGIDNYRAGRTAGYYIGRLAAHPGRVLLLGGRMGYRAHADRMAGCVDQLKEAFAALACDDAPVETLDQDDRCYRAVTNALHTYDDIVGIYNSGAGSAGIEAALRKAGAAGRVVWVGHEMIDLHRTYIEAGSMDIAIDQDPDGQAISALQHVLHACGIVDQPPPGDPVEFRVFCSANVRTSAYLQT
Proteobacteria/Beta	Burkholderia	5307	52155	Bamb_2736	Bcep18194_A6011	Q39D61_BURS3	U		Burkholderia sp. 383	269483	Sugar utilization	null	MAGESGPRWRKRTARFDEIAALAGVSTTTVDRVLNERGSVSAQARERVVAAARQLGVPRQLPDTRHGLIHVDVLLPDTDAAFFRRLQLALQRSLQMLDRRVVVHRTILPAADDERAATLIERPAYRRAALIVTARDTARVRDALAGAIARGETVVTMVTDIGGIDRVHFAGIDNYRAGRTAGYYIGRLAARPGRVLLLGGRMGYRAHADRMAGCRDQLAEAFAAVRCNDEPVETLDQDDRCYRAVTKALQAHDDVVAIYNSGAGSAGIEAALRKAGAAGRVVWIGHEMIDLHRTFIEAGAMDLAIDQDPDGQVISALQHVLHACGIVEQPPPADPVEFRVFCPANVRTSAYLPA
Proteobacteria/Beta	Burkholderia	5264	51840	Bamb_4155	Bamb_4155	Q0B815_BURCM	U	*	Burkholderia cepacia AMMD	339670	Sugar utilization	null	MTDKERKTWVTASDVAVRAGVSRSAVSRAFSPTASIAPETRERVMVAARALGYQVNLIARDMITQRSSMIGVVTAGFENPFRARLLSDLMAALGQRAFTPLVTNADDPHQVRQSLERLLSYRIAGLVMTSASPPLSVARQYLDHRIPVVMINRDANLPGADVVVSDNAAGAAHAAQQLVRAGARRLAFVGPRTASYSARSRADAFAQGLQRGDAFDATLVRVIDTRSDTHACGIDAARQLFASGERPDGVFCSSDLLALGVIDAARDAFGLRVPDDLRVIGFDDIPAAAYDAYRLTTLRQDTQGLAHAAVDLLADRIQTFDGVSRTCVVPVTHVARHSCA
Proteobacteria/Beta	Burkholderia	5264	51845	Bamb_4155	Bcep18194_B0942	Q398Q5_BURS3	U		Burkholderia sp. 383	269483	Sugar utilization	null	MNDKERKPWVTASDVAARAGVSRSAVSRAFSPTASIAPQTRERVMVAARALGYQVNLIARDMITQRSSMIGVVTAGFENPFRARLLSDLMAALGQRALTPLVTNAEDPRQVRQSLEQLLSYRIAGLVMTSASPPLSVAQQYLEHRIPVVMINREANLPGADIVVSDNAAGAVHAAQRLVRAGARRLAFVGPRSASYSAQSRATAFEHAIGRGDAFDATLAHVLDTPSDTHASGVEAARHLFANGKRPDGVFCSSDLLALGVIDVARSEFGLRVPDDVRVIGFDDIPAAEYDAYRLTTLRQDTRGLAHAAVELLADRMQTFDGPSRTRIVPVTQVVRASCA
Proteobacteria/Beta	Burkholderia	5264	51846	Bamb_4155	Bcep1808_5290	A4JPN5_BURVG	U		Burkholderia vietnamiensis G4	269482	Sugar utilization	null	MIGKERKTWVTASDVAARAGVSRSAVSRAFSSTASIAPDTRERVMAAARALGYQVNLIARDMITQRSSMIGVVTAGFENPLRARLLSDLMAVLGQRAFTPLVTNADDPQQLRQALERLLSYRVAGLVMTSASPPLSVARQYLAHRIPVVMINREANLAGADVVVSDNAAGAAEAAQRLVHAGARRLAFVGPHTASFSARSRADAFAHALQRGNMSGATLASVIDTASDTHACGLDAAQQLFAAGHRPDGVFCSSDLLALGVIDAARAAFGLRVPDDVRVIGFDDIPAAAYHAYRLTTLRQDTQGLAHAAVDLLADRISAFDGASRTRVVPVTHVVRHSCA
Firmicutes	Bacillales	5718	55990	BC0230	BC0230	Q81IW5_BACCR	U	*	Bacillus cereus ATCC 14579	226900	null	null	MANIKDIAKMAGVSVTTVSRVLNDHPYVSEEKRKAVIEIVEKLNYSQNANAVHLSKGKTNIVGVILPYINHPCFDAMVSGMMETALAHNYRVLLCQTNYNKKEEMKSLHMLKTKQLDGLIICSRANDWETIEPYASYGAIIACEDNDISNISSVYTNHSAAFQLGMDYLIEKGYKKIGYCTGRKLGPSSQKRFDVYKQQLQSIDEEVNEEWIFTECFTLEDGVKVAHKLKEMQDLPEALIVAGDEVAIGVMTEVEKLGIQVPEDLAIIGFDNQPISQVLQLTTIDQNLKEIGKTAFEMLHRKVNDESSEQEKLEIPYELVERSTV
Firmicutes	Bacillales	1230	11323	BglZ	RBAM_013640	A7Z401_BACA2	U		Bacillus amyloliquefaciens FZB42	326423	Beta-glucosides utilization	Beta-glucoside	MATIRDIAGAAGVSVTTVSRVLNDHPYVSKDKRERVKKAMQSLGYTRNIHAVHLSKGFSDMIGVVLPSVNLPYFADLVAGIAEAAEASGVHLSLYQTDYQQQKERFALSQLQERQVDGLIICSKAIPDEHLLIVKEPLILCQYTDAAGLSSISNPHREAFRHGLDYLIEKGHRKIAISLARKKGKNSQVRIAAYKEALKKIGQPYREELVVEKALTLLDGKALFHKWKSWDDKPTALFAANDQVSAGLYLEAKANGTRIPEELAILSIDNHDISKMLGISTIDIQTKEMGKQAFHMLENRISGGPPARKVLDYRLIERSTV
Firmicutes	Bacillales	1230	11324	BglZ	BC4211	Q818N8_BACCR	U		Bacillus cereus ATCC 14579	226900	Beta-glucosides utilization	Beta-glucoside	MANIKQIAKTAGVSISTVSRVLNNHPYVKEEKRKRVLDAVEELNYAKNINAVHLIRGKTYTIGVMLPFINLPYFSTIIEGIGNEALLAGYHINLCQTNYDSIEEIRVLEMMKMKQFDGMIICSRTSSWEQIEPFAKFAPIISCEKMKHPLISSIYVDHYEGFRLGTAYLLSRGHEKIGICLARKTSVNSMEREKAFADTLRNEGKTLHPEWIFHQCYTMQDGAQILHRILNMKNRPTAIFTANDQVAAGLLTEARKHGIRVPEDLAILGFDNHEISKALEISTIEHPGLAMGSHAFSLFHKQIQSEQIVGSAKELSFHLIERETV
Firmicutes	Bacillales	1230	11327	BglZ	BLi01596	Q65KB9_BACLD	U		Bacillus licheniformis DSM 13	279010	Beta-glucosides utilization	Beta-glucoside	MANIREIAEAAGVSITTVSRVLNGHPYVKEEKRQKVLETIERLEYARNMHAVHLSKGFSNMIGVVLPTISLPYFGELLEGIAEEAAKEGVHFSLYQTNYQLEKEIFALEQLKQRQVDGLIFCSKAMSDEALLDWRETGPFILCQDSGEQHFATVSIPHKEAFRLGLDFLIEKGHTKIAIGLARKNGMNSHFRLKAYKEALAAIGEPYREEWVFERSLTITDGQKLFSEWKGMEEKPTAVFVANDQVSAGIFLEAQRHQVDIPGSLAILSCDNQPISEVLGISTIEINIKEMGKRAFRLLQKRIGGAGPEKLTVPYKLIKRATV
Firmicutes	Bacillales	1230	11328	BglZ	BPUM_1277	A8FCJ3_BACP2	U		Bacillus pumilus SAFR-032	315750	Beta-glucosides utilization	Beta-glucoside	MANIREIAKRAGVSVTTVSRVLNHHPYVKEEKRERVLDAMKELKYTRNIQAVHLAKGYSNMLGIVLPTIDHSYFSRLVTGIAEKAQARGMHFSLFQTGYDPLKEKEALMSLKERRVDGLIFCSNALSDRDISRWQEFGPIIFCHPVPSENCSTVSIAHDQAFKEGLHHLAACGHQRIAIVLARIEGTNSQSRLQAYQNMMRSLGQEIDEEWIIEGKLTLFDGKQLFAEWQKMKNRPTALFITNDDVSAGFLLEAQRHDIKVGESPAILGFQNDQLSEALRISSIDIPLKRMGQEAFDLFDQAIKGEAPEKRMLPFRLIERSTTVFKNNSLTHVSSVLYDKRD
Firmicutes	Bacillales	1230	11329	BglZ	BSU13870	YKVZ_BACSU	R	*	Bacillus subtilis subsp. subtilis str. 168	224308	Beta-glucosides utilization	Beta-glucoside	MANIKDIAEKAGVSVTTVSRVINNHPYVSEDKRKRVFEAMESLEYTRNIHAVHLSKGFSNMIGVVLPTVNLPYFAELIAGIADAAAESGVHLSLFQTNYEVQKEIFALSQLKQRQVDGLIFCSKALADEKLMEWEGPILLCQNSDNARFPTISIPHQEAFRNGLDYLIAKGHKKIAICLARKKGMNSHFRIKAYKEALEEIGEAFREDWVIEKAITINDGKALFHKWNTWKEKPTAIFVANDQVSAGLFLEAKNQRVSVPDELAILSVDNHEISQALGITTIDIQTREMGKQAFAILEKRIQGQPIERKVLDYRLIERSTV
Firmicutes	Bacillales	5719	56001	BC5402	BC5402	Q814M6_BACCR	U	*	Bacillus cereus ATCC 14579	226900	null	null	MTNIRKIAELAGVSVSTVSRVLNNHPYVNEQKRKEILAIIEELNYTQNVNAIHLVKGKTNVIGVLLPHVNDQYYSAIIEGISKETAKNNYNMMLCQTNYSEERELEILNMLKMKKLDGVIICSRTNSKEKLEEYTKFGPIVMCEEIDSKYISSVHIDYYKVFSRGMKSLIDAGHTRIGYCIGRSNSVNSQRRKKAYEDSLQQSIVTPLETWKFEGCFTVEDGRNVIREWAHMSVKPTAFLVSCNHIAAGMVTEAKKQGVRIPEDITIIGCDDQEVADILGITTISHSSKNVGVKAFELLYEKINEEKLDVKHIELLPELVDRETT
Chloroflexi	Chloroflexi	5465	53459	BfrR	Cagg_3715	B8GAH6_CHLAD	U	*	Chloroflexus aggregans DSM 9485	326427	Fructooligosaccharides utilization	null	MYDVARLAGVSQTTVSFVVNNVTSAAISQETRDRVWAAIHALGWRPNAIARGLRTRHSQTLGLISDEVVTSPYAVRMILGAQEAAWSVRQMLLVVNTSGQQDIEQMALQFMLERRVEGLIYATMYHHEVVPPPDLGPVPMVLVNCFVADRSLPALIPDEVQGGYTATEALIRRGHRRIAFINEVIPMPALFGRLEGYRRALADYGLPFDPTLVCSVHSNAQEAFAATRALLELAERPTAIFCFNDKMAMGAYDAIKRLGLRIPHDVAVVGFDNLELIAAQLYPPLTTVELPHYEMGRRAVEMLQTLPAGETLPPIQHYIPCPLIERASI
Chloroflexi	Chloroflexi	5465	53458	BfrR	Chy400_2954	B9LLI6_CHLSY	U		Chloroflexus sp. Y-400-fl	480224	Fructooligosaccharides utilization	null	MYDVARLAGVSQTTVSFVVNNVTSAAISQETRDRVWAAIHALGWRPNAVARSLRTRHSQTLGLISDEVVTSPYAVRMILGAQEAAWNNRQMLLVVNTSGQQDIEQTALQFMLERQVEGLIYATMYHHEVTPPTGITTVPTILVNCFVADRSLPAIIPDEVQGGYTATETLILRGHRRIAFINEIIPMPALFGRLEGYRRALTDYGLPFDQSLVRSCHSNAQDAFSAARDLLERPDRPTAIFCFNDKMAMGVYDAIKRLGLRIPQDVAVIGFDNLELIAAQLYPPLTTIELPHYEMGKRAVELLQSLPAGESLPPTQHYIPCPLIERASV
Firmicutes	Lactobacillaceae	4598	44389	BfrR	LBA0500	G1UB58_LACAC	U	*	Lactobacillus acidophilus NCFM	272621	Fructooligosaccharides utilization	null	MIVMKGNKNMATMKDVAQRAGVGVGTVSRVINHVPGVKKSTLVKVKEAIKELNYIPDEYARGLKTKSSRTIALILPSIWHPFFSEFAYYVEKRLYKEDYKLLLCNSNRDPKEEAKYIKMLKQNKIDAIIAITYSDIGQYIYSNIPFVSLDRYFEKKVSYVTSDNYEGGKLAAKELLAHGAKNIAYIGSHSKYPNATMLRKDGFDDYLKEHDINYKEIFLHEPVPEADFINHLLEMLTAHPEIDGIFCHTDSLLLTLRKALIQHGYRVPEDIQLIGFDGIKMDSAHSLGISTIAQPVEKLANGAVDLVLKKIADPSVKNEAKMYPVKYINGNTTK
Firmicutes	Streptococcaceae	4597	44380	BfrR	SGO_1306	A8AXS7_STRGC	U		Streptococcus gordonii str. Challis substr. CH1	467705	Fructooligosaccharides utilization	null	MQGKSRTSITMKDVASRAGVSVGTVSRVINNEKGIKKVTLKKVQEAIEELNYIPDNYARGLKTNKSSNIALIIPTIWHPFFSELAYYVEKELLKNQYKLFICNADGDVKNEIEYIQMLEKNKVDGIIAVTYSDVDKYVSSSLPFVSFDRHFSENVSYVTSENYKGGQMAAEELLNRGAKQLAYIGSTNIHENETKQRELGFCEKLMSMGHSVLKLDMSEPLVEPEKQIEKFLLEHSTIDGIFAINDFMAIKVMKVMEKFGKKAPQDYQIIGFDGLRNAADQTYLLSTIAQPLDKIAQASVKLLLQLISKEKAVLSRVLLPVYFAEGGTTKKIQKSLDKK
Firmicutes	Streptococcaceae	4597	44383	BfrR	SP_1799	Q97P45_STRPN	U	*	Streptococcus pneumoniae TIGR4	170187	Fructooligosaccharides utilization	null	MVEQRKSITMKDVALEAGVSVGTVSRVINKEKGIKEVTLKKVEQAIKTLNYIPDYYARGMKKNRTETIAIIVPSIWHPFFSEFAMHVENEVYKRNNKLLLCSINGTNREQDYLEMLRHNKVDGVVAITYSPIEHYLTSGIPFVSIDRTYSDIAIPCVSSDNDAGGREAAKQLISKGCQHLAFVGGHNTTINETKRRRISFEKYVQEHKIPLSIFDLDETVTDYYGKLESFLEENSSIDGIFTINDFTALDVIEILEKNGKRIPHDVQIIGYDGIKMAGDRDYLLSTIEQPLEEMAKEAVRILFDIIDGKTVNLQTILPVKFVEGKTTKNENKS
Firmicutes	Streptococcaceae	4597	44386	BfrR	SSU05_1341	A4VW18_STRSY	U		Streptococcus suis 05ZYH33	391295	Fructooligosaccharides utilization	null	MEEQKSITMKDVARVAGVSVGTVSRVINNEPGIKESTLEKVNAAIKELNYIPDVYARGMKKNKTETIALIIPTVWHPFFGEFAYHVEVELSKKNYKLLLCNISGPKRELDYLTMLQQNKVDGIIAITYSPIEDYLSSNIPFVSIDRTYENKAIPCVSSDNRAGAELAANTLIAKGGRHFAFIGGHNKTINETKKRRLYFEKRILEAGFPCHVLDLEEPYDDFVGQVEEFLINNPQVDAIFTINDFTALDTLAVLEKLRRRVPEDVQVIGYDGIQLASEKSLALSTIRQPLESMAQEAVACLIDIIEKRERPLQVTLPISYLEGKTTKNF
Firmicutes	Streptococcaceae	4597	44388	BfrR	SUB0303	B9DTH6_STRU0	U		Streptococcus uberis 0140J	218495	Fructooligosaccharides utilization	null	MNRKSFTMKDVAKRAGVSVGTVSRVINQESGIKKVTLEKVTKAIAELNYVPDNYARGMKTNRTETVALIVPTIWHPFFSEFAFYIEKELSNINYKLLLCNTDGVKKEIEYINMLQQNKVDGIIAITYSPIEDYLATNIPFVSIDRSYGNKDIPWVSSDNYAGGQKAAEVLVENGCKNLLFVGSHNQTINETKNRRNGFEDFLRDKGVHFSSFDLEEPIENFNEQLYEYLAEHLEIDGIFAINDFTALDIIDALAKLGKNVPHDVQIIGYDGIKFAKEKSFPVSTIKQPLKEMAQEAVRIVLSIIENEPHKLQVTLPISYIDGPTTKK
Actinobacteria	Bifidobacteriaceae	5308	52159	BgaR	BIFANG_00301	C4FDD4_9BIFI	U		Bifidobacterium angulatum DSM 20098	518635	Galactosides utilization	Beta-galactoside	MARSSVSLQDVAKEAGVSPQTVSRVANGSAAVRPETQSRVEEAMKKLGYRPNYAARALKSGRFNNIGVLLSHMSAFGNARILEGIVSTAAKHGYSTTIRTLDTLQDRSLAGALKLVEDLPLDGVIVIMERDFPDFNQFTPPQNLPVVLISEEPADNCVTIDSDSYGCSTAAVDYLLSKGHHTVYHIAGPSTSRAAQSRIRGWHDALAQVGAAIPPLYIGDWGADSGYQAGLALAHEKECTAVYAANDQMAYGAMLGLRAAGKRVPEDISIIGVDDSLEGMVPRLELTTMRLRFHELGREAFAMIERQHNGEKIAVGVKTVIPPEFVDRGSVRELK
Actinobacteria	Bifidobacteriaceae	5308	52160	BgaR	BLA_0465	B8DWB3_BIFA0	U		Bifidobacterium animalis subsp. lactis AD011	442563	Galactosides utilization	Beta-galactoside	MAGSVSMKDVARLAGVSSQTVSRVANNSSEVKPETRLRVERAMEELGYRPNYAARALKHGSFKDVGVVLFNMTSYGDSHILNGVVDAAREHGYATTIRSFEQGCPATLQSAIDQMKTLPVDGVVFILEQQVADFNTFVPSVELPVVLVSEEPSDHCPTIDSDQYGTSVVLVDYLLAKGHRNVYHIAGPSYSVAAQSRRRGWEDALRQQGIVPPSVYIGDWEADSGYQAGLALAHERDCTAVYAANDQMAYGCILGLREAGKRVPEDVSVVGVDDSLQGIVPRLELTTMREKFNELGREAFGMILAQCNGDKLPVGVKTVIPSVLVERGSVSEVEDRGA
Actinobacteria	Bifidobacteriaceae	5308	52161	BgaR	BLA_0465	B8DWB3_BIFA1	U		Bifidobacterium bifidum NCIMB 41171	398513	Galactosides utilization	Beta-galactoside	MAGSVSMKDVARLAGVSSQTVSRVANNSSEVKPETRLRVERAMEELGYRPNYAARALKHGSFKDVGVVLFNMTSYGDSHILNGVVDAAREHGYATTIRSFEQGCPATLQSAIDQMKTLPVDGVVFILEQQVADFNTFVPSVELPVVLVSEEPSDHCPTIDSDQYGTSVVLVDYLLAKGHRNVYHIAGPSYSVAAQSRRRGWEDALRQQGIVPPSVYIGDWEADSGYQAGLALAHERDCTAVYAANDQMAYGCILGLREAGKRVPEDVSVVGVDDSLQGIVPRLELTTMREKFNELGREAFGMILAQCNGDKLPVGVKTVIPSVLVERGSVSEVEDRGA
Actinobacteria	Bifidobacteriaceae	5308	52162	BgaR	BIFBRE_00761	D4BMY3_BIFBR	U		Bifidobacterium breve DSM 20213	518634	Galactosides utilization	Beta-galactoside	MQDVAKAAGVSPQTVSRVANDSNAVKPETRQRVEAAMERLGYRPNYAARALKHGRFQDIGVVMFDTTRFGNARILDSIVTHAAEDGYSVTIQTMSNGAERTLASTIDRMQRQPVDGVIVVLEERISDFVGYKPPRELPVVLISEAAADHCPTVDADQYGCSTAIVDYLMSKGHKTVYHIAGPVTSRAAESRAQGWREALEQIGARVPSMYIGDWCADSGYQAGVALAHDPECTAIYAANDQMAYGAMLGLESAGKRVPEDVSIVGVDDSLVDVVPRLNLTTMRMRNDAIGATAFSMVRRQCEGEKVPAGIKTVIPTELIERGSVRDIS
Actinobacteria	Bifidobacteriaceae	5308	52163	BgaR	BDP_0654	D2Q932_BIFDB	U		Bifidobacterium dentium Bd1	401473	Galactosides utilization	Beta-galactoside	MLISEEPANYCPTIDSDSYGCSTAAVDYFLSKGHKTVYHIAGPSTSRAAQSRIRGWRDALAQVGIPTPPMYVGDWEADSGYQAGLALAHEHDCTAVYAANDQMAYGAMLGLRAAGKRVPEDVSIIGVDDSLKGVVPRLELTTLRLKFKVVGNEAFSMIERQCNGEKVPSGIKTVIPPEFIDRGSVRELN
Actinobacteria	Bifidobacteriaceae	5308	52165	BgaR	BL1171	Q8G549_BIFLO	U	*	Bifidobacterium longum NCC2705	206672	Galactosides utilization	Beta-galactoside	MSRPTQVSMQDIAKAAGVSPQTVSRVANGSDAVKPETRQRVEAAMERLGYRPNYAARALKHGRFQDIGVVMFNTATFGNARILDSIVANAADDDYSVTIQTMRHGAERTLSAAIDRMQRQPVDGVIVVLEERISDFVGYKPPREFPVVLICESAADHCPTVDADQYGCSTAIVDYLMSKGHKTVYHIAGPSTSRAAESRARGWREALEQMGARVPSMYIGDWCADSGYQAGVALAHDPDCTAIYAANDQMAYGAMLGLQSAGKRVPEDVSIVGVDDSLVDMVPRLNLTTMKLRFDDIGATAFSMVRRQCEGEKIPVGVKTVIPPELIERGSVRDIS
Actinobacteria	Micrococcineae	5356	52536	BgaR	CMM_2696	A5CUJ3_CLAM3	U		Clavibacter michiganensis subsp. michiganensis NCPPB 382	443906	Galactosides utilization	Beta-galactoside	MFAQTSVMLATMTSPPSAVKSGGRRTPGGRTVSMADVAAHAGVSAQTVSRVSNGAQNVEASTRQRVMDAMAELGYRPNSAARALKTGRFRSIGIIMFTLSTLGNMRTLDAIVTAASGAGYTITLMPVPHPTEGEVAGAFSRLQEEAVDGVVIIIEAHMLDRADVIIPVGLPVVIIDSDAGDPFVVVDTDQEQGTRLVTQHLLDLGHTAIVHVAGPSTSYSAARRAAEWRATMLDAGLQPEDPAQGDWTTASGYRIGKELGRRADITGIVAANDQMALGIMHALHELGRDVPGDISVVGFDDTEESSSFWPPLTTVHQDFTEIGRRSMQVLLEMLDGREPSGDRIVPTRLVVRESAAAPRGDAR
Actinobacteria	Micrococcineae	5356	52544	BgaR	Jden_0100	C7R598_JONDD	U	*	Jonesia denitrificans DSM 20603	471856	Galactosides utilization	Beta-galactoside	MDSVAQPNSPRGSRKRLGPSIGDVARLAGVSSQTVSRVSTGAERVRPETRERVLSAMEQLGYSPNHAARALRYGRFGSIGVIAHHLSRTGEFHTIDALVEAARKNGFTVNLIDVESPSSDDMSVAVQRLTHQSIDGLVIIRAETATPDTLQLPRRLPIVVSDSRFIGHHPAVSTDQWAGIAHAVRHLLGLGHTTVHHLAGPVDSSPAGVRIQAWRDTLTAHDRMIPDVVRGDWSAASGHAVGTRLLADPSVTAVLCGNDEMAAGLMRAAHERGLRVPEDVSIIGFDDIPLASYLWPPLTTVRQDFSAVGTTLMDVLFQQIRSGQPLTDHRTTIPTELIVRGSTAPPRP
Actinobacteria	Streptomycetaceae	5291	52042	BgaR	SAV_1031	Q82PA2_STRAW	U		Streptomyces avermitilis MA-4680	227882	Galactosides utilization	Beta-galactoside	MNTADSGSTSVPRALTRMDEQSARRRQSASMADVARLAGVSSQTVSRVSNGYAGVTEETRQEVLAAMKELGYRPNSAARALKRGEFRTIGVITFNLSTTGNMRTLEAIATSAAQEGYAVTLLPVAVPTQDEVHGAFSRLGELAVDAVIIIMEVHLLDAATISLPPHVQVAVADSDAGDRYTVVDTDQAGGARAAVRHLLELGHRTIWHLAGPEESYAAQRRADAWRAELIEAGRVPPAVVRGDWSAESGYQAGLRIADEEDCTAVFAANDQMALGLLRALHERGRRIPEDVSVIGFDDIPEAGSFLPPLTTVHQDFAEVGRLCVQGVLRRMRHDAAEHGTTLVPTKLVVRDSTAPPPSR
Actinobacteria	Streptomycetaceae	5291	52041	BgaR	SCO7411	Q9L148_STRCO	U	*	Streptomyces coelicolor A3(2)	100226	Galactosides utilization	Beta-galactoside	MSTAEEVPTSAPAPPRRGRDRTASMADVARLAGVSSQTVSRVSNGYAGVTEETRQQVLAAMKELGYRPNSAARALKRGEFRTIGVITFTLATTGNVRTLEAIATSAASEGYAVTLLPVAVPTQDEVRGAFSRLEELAVDAVIVIMEVHLLDAASLKLPPHVQVVVVDSDAGDTYTVVDTDQAGGSRAAVRHLLDLGHDTVWHLGGPEGSFAAQRRTDAWRRTLTEAGRTPPPLVRGDWSAESGYRAGLELAAREDCTAVFAANDQMALGLLRALHERGRRVPEDISVIGFDDIAEAGSFLPPLTTVHQDFAEVGRLCVRAVLRKMRAAGPEQGTTLVPTRLVTRASTAPPPR
Actinobacteria	Streptomycetaceae	5291	52039	BgaR	SCAB_43681	C9Z738_STRSW	U		Streptomyces scabiei 87.22	680198	Galactosides utilization	Beta-galactoside	MDATDGRSTRRRSARPRQGPSMGDVARLAGVSSQTVSRVSNGFAGVNEDTRRQVLAAMRELGYRPNSAARALRRGEFRTLGVITFSLSTLGNIRTLDAIATSAAREGYAVTLLPVAVPTQDEVNGAFSRLGELAVDAVIVIMEVHLLDAATVSVPPGVQVVVADSDAGDRYTVVDTDQAGGARDAVRHLLELGHGTVWHLAGPEDSFAAQRRANAWRATLEEAGRPAPPLVRGDWSAESGYRAGLRIAEQADCTAVFVANDQMALGLLRALDERGRRVPEDVSVVGFDDIPEAASFLPPLTTVHQDFAEVGRLCVRGVLSKMREGAEEGTAGHGTTLVPTRLVRRRSTAPAPPPAS
Proteobacteria/Gamma	Alteromonadales	5258	51788	BglR	ATW7_07864	A0XZS0_9GAMM	U		Alteromonadales bacterium TW-7	156578	Beta-glucosides utilization	Beta-glucoside	MATIYQVSELAGVSLATVSRVMNKNTKVSDKTTKKVLDAMHTLGYKPNSIAQSLASNCTNSVGILVSELHGPFFAQMMAGIESELRAAGKHVIITTGHSEEDKEKEGIDFLISRRCDAIILHVEAVTDEYLISLSRGTTPVYLMSRYVEELKEHCISLDNKLGGYLATKSVLEQGHTEIAYIAGPQFKADAANRLAGHKQALEEANITFDPSLYFEGDFNETGGSSALEHLINSKLNFTALVCANDEMASGAMKYAREHGYHLPNDLSIVGFDNVIFANYLYPTLTTIDNPVAKMGEMAAKLVLKDVYQTKNIKINRFFEPTLMQRDSSAPLK
Proteobacteria/Gamma	Alteromonadales	5258	51788	BglR	ATW7_08004	A0XZU8_9GAMM	U		Alteromonadales bacterium TW-7	156578	Beta-glucosides utilization	Beta-glucoside	MATIYQVSEMAGVSLSTVSRVLNDNDYVSKKTKKKVLEAMKELGYQPSSIARSLASSRTNSVGILVSELDGPFFGQMMSAIEEQLRIAGKHVIITPGHSDEKKEKNGFEFLISRNCDAIIAHVEAVSNEYLIELSKGKTPIYLMSRYVKEIEQNCISLDNVMGGYLATKAMINKGHKHIAYIAGPQFKEDASDRLKGHKKALAEYNLTFDESLYYVGDFKETGGSDGLRHFIQNKAQITALVCANDEMASGAMKYAREHGFNIPKDLAIIGFDNVIFTNYLYPTLTTIDNPVPEMGRAAANLVLKDIYKKSGITVTQVFEPKLILRDSTPDIN
Proteobacteria/Gamma	Alteromonadales	5258	51789	BglR	MADE_03798	F2G9T1_ALTMD	U		Alteromonas macleodii 'Deep ecotype'	314275	Beta-glucosides utilization	Beta-glucoside	MATIYQVSEAAGVSLATVSRVMNGNAKVSERTRKKVEDAMASLGYQPNAIAQSLASNRTNSVGLLVSELHGSYFGDLMSTVENVLKQNGKHVIITAGHVDEKREHEAIEFLKSRRCDALILHAEAVSDDYLKKLVDSKIHVVVINRKVDELDENCFVVDNEQGGYLATKAAIDAGHKHIAYISGPLFKKDASDRLSGHKKALEEAGIPFAKTSMFEGDFHESSGQEGMLYLQENYPELTALVCANDEMASGAMTAAREAGFDIPDQLSIIGFDNVLFSRYLYPKLTTINNPINAMGEMAAFWVLEHVYDIKSPIPIEHLFVPEMIDRDTLGNL
Proteobacteria/Gamma	Alteromonadales	5258	51789	BglR	MADE_04075	F2GCL7_ALTMD	U		Alteromonas macleodii 'Deep ecotype'	314275	Beta-glucosides utilization	Beta-glucoside	MPTIYQVAERAGVSLSTVSRVLNGKTSVNKVLKERVEKAVKELNYRPNSVARSLANSRTDSIGVLVPELNAPFFGDLMQAVESTLRAQDKHVIITVGRNCLETEKDAVEFLISRNCDALIMHAEALSDAYLLELNQSKLPVALVNRKVDGLPDACTTLDNEKGGYLATRHLLELGHKHIAYISGPTDKADACLRLKGHKRALSEAGLTVTPQLIFNGDYSEDDGKVGLLELMAQDQHFSALVCANDWMASGAISCARDLGMSLPHDLSIVGFDDVVFAHHVFPRLTTVSNPVAEMAEMSAKYILNKVYGQGHEIKQCFEPTLVVRESAIKCEG
Proteobacteria/Gamma	Alteromonadales	5258	51790	BglR	CPS_3709	Q47XU4_COLP3	U	*	Colwellia psychrerythraea 34H	167879	Beta-glucosides utilization	Beta-glucoside	MATIYEVSKLARVSLATVSRVINKSPQVSDKTRQKVMDAMAELGYRPNSIAQSLASNRTNSVGILVSELHGPFFGQMMAGIESELRAAGKHVIITTGHSEEDKEKDGIEFLISRNCDAIILHVEAVSDEYLIDLCKGHTPVYLMSRYVDEISENCISLNNELGGYLATQSVIELGHSAIAYIGGPQFKADSKDRLVGHKRALAENNISFNDTLYFEGDFKEKGGSDGLKYFNESNKGFSALICANDEMASGAITYAREQGLSLPRDLSIIGFDNIIFARHTYPKLTTIDNPVNSMGHMTAKLVLKNIYQQKNISITHFFEPTLITRDSIISKT
Proteobacteria/Gamma	Alteromonadales	5258	51791	BglR	GHTCC_010100001614	-			Glaciecola sp. HTCC2999	455436	Beta-glucosides utilization	Beta-glucoside	MATIYEVAELAGVSLATVSRVMNGNVKVSDKSRSKVQSAMKELGYQPNIIAQSLASNRTNRVGVLVSELSGPFFSYMLAVVESALREEGKHAIITAGHSNVEKEKDAIEFLLGCRCDALILHIDAVSDEYLLKLRERKVPFSLINHHIDDIAECCFTMDNEQGGYLATKSVIDAGHTQIAYISGPEFKEDAQLRLQGHQRALAEAGIAFDDNFHYRGNYNEDGGKAGFDELSSQQFTALICANDEMATGAMYSARKHGLSLPNDLSIVGFDDQVFARYTYPTLSTVKNPIAELGSMAAKWVLKEVYEINTNEPISNVFEPTLIKRDSLQSIQGNQ
Proteobacteria/Gamma	Alteromonadales	5258	51792	BglR	OS145_00625	A3WL12_9GAMM	U		Idiomarina baltica OS145	314276	Beta-glucosides utilization	Beta-glucoside	MATIYEVSKLAGVSLATVSRVINNNTPVREATRVKVLEAMDKLGYHPNSIAQSLASSRSNSIGIVVSELNGPFFGTLLSDIEAAFRRAGKHVIIAAGHSDERLEKESIAFLKSRNCDALILHVEAVSDDYLRQLKEGGTPFVILNRFVESMSDRCVTLNNQHGGYLATQHLLRNGHRKIGYISGPMWKNDAEQRYLGHLRALAEYGIESKSSLFYEGDFHELGGVKGVAALLHADADITAIVCANDEMAAGAVTTAREQGLRLPEDLSIIGFDNVNFSHYMYPKLTTIDYPIGGMGVMAARWVLKHIYQQKLDNIQTVFEPRVIERDSVHSI
Proteobacteria/Gamma	Alteromonadales	5258	51796	BglR	PTD2_03966	A4C564_9GAMM	U		Pseudoalteromonas tunicata D2	87626	Beta-glucosides utilization	Beta-glucoside	MATIYDVSLLAGVSLATVSRVMNNTGRVSDKTRKKVEDAMSSLGYRPNMVAQSLASNRSNSVGILVSELSGPYFGQMMSGIESEVRAAGKHVIITTGHSQEDKEIEGIEFLVSRKCDALILHVEAVSDDYLIALSKQSIPIYLVGRLVPELAEQCISLDNVLGGYLATKTLLEHGHRDIAYIAGPLFKPDARNRLIGHQQALAEFGIRFEDTLFYEGNFNESGGEQGFEYFVASKRPFTAIACANDETAAGAMELAREVNYQLPQDLSIIGFDNIIFAKYLYPRLTTIENPVMQMSQMAARLALKQVFNEKKHQIQHIFEPKVIMRDSLLQQPNAKN
Proteobacteria/Beta	Burkholderia	5267	51864	BglR	Bphy_5439	B2JNW3_BURP8	U		Burkholderia phymatum STM815	391038	Beta-glucosides utilization	Beta-glucoside	MATLKDVAELAGVGLSTASRAISGKGPVSADAAARVKAAIAELNFRPSSIGRAMATQQLGIIGLFVPTFFGSYYGTILKQTDLELRAVHRHVVVATGCGESTPREQALEAVRFLIGRDCDGVVVISHDLHDEDLDELHRMHPKMVFLNRAFDALPDASFCPDHRRGGELAAATLIEHGHRKLAVISGPFTASDNVERLDGFFDELARHGIARDSVPLIESDFSPEGGYAATCQLLESKAPFTGLFCANDTMAVSALARFQQLGISVPGDVSVIGYDDDYSAAYAAPALTSVHIPTAELTQNAVRWLINQCYGTKWEIFREFPVTVSMRASVARV
Proteobacteria/Beta	Burkholderia	5267	51868	BglR	Bxe_B2079	Q13PT1_BURXL	U	*	Burkholderia xenovorans LB400	266265	Beta-glucosides utilization	Beta-glucoside	MATLKDVAALAGVGMSTASRAISGKGPVSADAAARVKAAVEQLNFRPSSIGRAMATQSLGMVGIFVPTFFGSYYGTILKQTDTELRAVRRHVVVATGCGEVSPREQAIEAVRFLIGRDCDGVVVISHDLHDEDLIMLHRMHPKMVFLNRAFDQLPEASFCADHHRGGELAARTLLDHGHREIAVISGPFTASDNQTRLQGFFAELAREGIARGEVTLIESDFSPEGGYAAAQKLLDTKRRFTGVFCANDTMAVSALARFHQAGIAIPDEVSVIGYDDDYSAAYAAPGLTSVHIPTAELTQNAVRWLLNQCYRTTWEIFREFPVSVTMRESVGPAPGVAATAIEAARLSPTP
Deinococcus-Thermus	Deinococcus-Thermus	5345	52468	BglR	Deide_00590	C1CXQ0_DEIDV	U		Deinococcus deserti VCD115	546414	Beta-glucosides utilization	Beta-glucoside	MATITLEDVAQAAGVSVSTASRVFSGTTKVRADKHAAVMKAADALGYRPNAIARSLASGRSMLIGVLTQDTSSPFYGEVLRGIEQGLEGSGYSAIFASGHWRVEEEASALHGLMGRPLDGLIVLGGHTPDERLSTLAAQLPLIAVGRGVQGLETQCLRIDNFQGSYDCARHLLELGHRRIAYIAGPASHRDARDRLEGFRRALADWKVDEDPNLLVEGDFLEPSGLMAVEALFSRGALFSALMVANDQMAYGARLGLYRRGIRVPEDISLIGFDDLSSSAFTTPPLTTMRQPTYEMGVAAAEAILAALGGTPLTPPEFRVQLIVRESTAPTHRDRQRLPPPDPQYPGERL
Deinococcus-Thermus	Deinococcus-Thermus	5345	52469	BglR	Dgeo_2858	Q1J2J7_DEIGD	U		Deinococcus geothermalis DSM 11300	319795	Beta-glucosides utilization	Beta-glucoside	MAQSVSPRQPVTLAEVAREAGVSPSTVSRILNGTAQVKANKVAQVRAAIEKLGYKPNAFARGLAKGASGSIGVLTQDIASPFYGDALGGIERGLMGSGYSPLIISGHWRTDEEEHAIELFMSRRVEALIVLGGHLPEEELRQLAQQLPVAVLGREVDFASPGSISLALDNRQAAYDLVSYLLDRGHRRIGHIMGPQDHADARDRLDGYRQALEDRGLPFQPSLVVQGDFHEPSGLIGTQQLLAQHPDMTAIFSANDQMAYGARLALYRLGLRVPEDMSLVGFDDLPGSAYTTPPLTSVRQPMAEMGHWLARFVVAQLTGQTVEPFQPRMELRLRESVATRRLP
Deinococcus-Thermus	Deinococcus-Thermus	5345	52472	BglR	TTP0038	Q746L5_THET2	U	*	Thermus thermophilus HB27	262724	Beta-glucosides utilization	Beta-glucoside	MLYSRAKMTKARPTIAEVARRAGVSPATVSRVLNGTARVSPEKVRAVLQAVEELGYAPSPLAQGLATGRSYAVGILLSDFASPFFGPILEALTLELEATPYRPIAVPGHWSLVRELEALEFLKAHRVEALVLLGTALDGEALGELGIPVLAFGQRVEGPKAWSLCLDNQQAAYEATRYLIDRGHTRIVHISSHRGGMDVRDRLLGYRKAMREAGLEARVVYGDLEEEGGYRAAAEAFRRYPDTTAIFAANDQTAFGARLYLYEQGLRVPEDVSLVGFDDIALSAYQIPPLTTVRQPIQDIGIALGRALRAVLAGEVPTLPRLELRLVERASVREVRA
Proteobacteria/Gamma	Enterobacteriales	5735	56181	BglR	y3567	Q7CGE6_YERPE	U	*	Yersinia pestis KIM	187410	Beta-glucosides utilization	Beta-glucoside	MSVTIKDVAKRAKVSISTVSYAINGSPKITEETRLRVLKIAQEMNYTANNNAKMLKAKKSGAIGLFFNSWFGPVYSELVRGIEERVHREHYDLVACSLYGGEQSTAHKYLRDRSVDGAIILTSSFDDRFLQSVASDVLPIVVLDRELKSPHIYNVLIDNFGGAFKAVNALLAKGCRDIYFFSGPEQSYDNQKRLDGFIAALGYHNIQLNRDFIIHSNFTEADAYLKMQALIAAGRVPSAIFSANDEMAIGILRAAKEHNIRVPDDLKVVGFDNIYASSVLTPSLTTINHHKYEMGVISANTLLRAIKEETNIDAVTLLPTELIERETL
Firmicutes	Enterococcaceae	5734	56168	BglR	EF1240	Q835X8_ENTFA	U	*	Enterococcus faecalis V583	226185	Beta-glucosides utilization	Beta-glucoside	MVGIKDIAKKAGVSISTVSYALNGSSKVTEETRTRIQAIAEELNYVPNMAARTLKRRQTNIIGVYLADYGGSFYGELLEGIKKGLALFDYEMIVCSGKKSHLFIPEKMVDGAIILDWTFPTKEIEKFAERGHSIVVLDRTTEHRNIRQVLLDNRGGATQAIEQFVNVGSKKVLLLSGPEKGYDSQERLAVSTRELTRFGIPYEIIQGDFTEPSGYAAAKKILSQPQTEPVDVFAFNDEMAIGVYKYVAETNYQMGKDIRIIGFDNSELGAFVQPRLATIAYSKHRWGMVAAEKIIHLMRGEAAESEHIYTRFIEGESFPSE
Firmicutes	Listeriaceae	5240	51663	BglR	lin1838	Q92AT1_LISIN	U		Listeria innocua Clip11262	272626	Beta-glucosides utilization	Beta-glucoside	MVGIKDIAKKAGVSISTVSYALNGSPKVTEKTRKRIMTIANELNYIPNMAARTLKTRETKIIGVYLTNYGGIFYGTLLEGLTKTLYKHGYELIACSGTKTHRFLPEKMIDGAIILDANFPSSEIINYANRGHKLVVLDRELTHENVCQVLLDNKGGATLAIDYLSTNFKGDFYVITGPEDSYDARVRLETAKQELARSNDKKVHIIEGDFSEESGEKAAAIIAENWKAPVSVFALNDNMAIGMYRYFAGTDLEIGKDVRIIGFDNTDISEYLVPRLATIEYSKYKWGAVAADKLVELLEGEKAENEIIYTTRISGPSVSNS
Firmicutes	Listeriaceae	5240	51662	BglR	lmo1727	Q8Y6G0_LISMO	U	*	Listeria monocytogenes EGD-e	169963	Beta-glucosides utilization	Beta-glucoside	MVGIKDIAKKAGVSISTVSYALNGSPKVTEKTRKRIMTIANELNYIPNMAARTLKTRETKIIGVYLTNYGGIFYGTLLEGLTQTLYKHGYELIACSGTKTHRFLPEKMIDGAIILDANFPSSEIINYANRGHKLVVLDRELTHENVSQVLLDNKGGATLAIDYLSTNFKGDFYVITGPDDSYDARVRLETAKQELARSGDKKVHIIEGDFSEESGERAASIIAKNWKAPVSVFALNDNMAIGMYRYFAGTDLEIGKDVRIIGFDNTDISEYLVPRLATIEYSKYKWGAVAADKLVELLEGGKAENEIIYTTRISGPSVSNN
Firmicutes	Listeriaceae	5240	51661	BglR	lse_1698	D3UP16_LISSS	U		Listeria seeligeri serovar 1/2b str. SLCC3954	683837	Beta-glucosides utilization	Beta-glucoside	MVGIKDIAKKAGVSISTVSYALNGSPKVTEKTRKRIMTIANELNYIPNMAARTLKTRETKIIGVYLTNYGGIFYGTLLEGLTQTLYKHGYELIACSGTKTHRFLPEKMIDGAIILDANFPSEEIINYAGRGHKIVVLDRELTHENVCQVLLDNKGGATLAIDYLSTNFTGDFYVVTGPEDSYDARVRLETAKQELARSGDKTAHIIEGDFSEESGENAAAIIAKNWKAPVSVFALNDNMAIGMYRYFAKTELEIGKDVRIIGFDNTDISEYLVPRLATIEYSKYKWGAVAADKLVELLEGGKAENEIIYTTRISGPSVSNN
Firmicutes	Listeriaceae	5240	51660	BglR	lwe1744	A0AJI0_LISW6	U		Listeria welshimeri serovar 6b str. SLCC5334	386043	Beta-glucosides utilization	Beta-glucoside	MVGIKDIAKKAGVSISTVSYALNGSPKVTEKTRKRIMTIANELNYIPNMAARTLKTRETKIIGVYLTNYGGIFYGTLLEGLTQTLYKHGYELIACSGTKTHRFLPEKMIDGAIILDANFPSNEILNYANRGHKLVVLDRELTHENVCQVLLDNKGGATLAIDYLSTNFKGDFYVITGPDDSYDARVRLETAKQELARSGDKKVHIIEGDFSEESGEKAAAMIAKNWKAPVSVFALNDNMAIGMYRYFAGTDLQIGKDVRIIGFDNTDISEYLVPRLATIEYSKYKWGAVAADKLVELLEGEETENEIIYTTRISGPSVSNN
Proteobacteria/Gamma	Shewanellaceae	576	5296	BglR	Sama_1400	A1S5F1_SHEAM	U		Shewanella amazonensis SB2B	326297	Beta-glucosides utilization	Beta-glucoside	MATIYDVSFLAGVSLATVSRVVNNTGKVSDKTRQKVHDAMAKLDYRPNTIAQSLASNRSNSIGVLVSQLDGPFYGPMMREVESALRAANKHVIIAAGHSDAAQEKDGVEFLLSRGCDALIVDAEILSNGYLVELCQGKTPVVLINRHVDGIDERCVHLNNLQGGLLASRHVLEKGHKQIAYISGPLFKLDARERLEGHRQALAEQGIAFDENLFYEGDFREEGGYEAMAQLLSRGRDFTAVVCANDQMASGAIAQCLERGLRVPEDISFVGFDNIPFPRYISPKLTTVCNPIQDMGRMAAHWVLREVYDQTDVTFCHRFEPELVVRDSVITR
Proteobacteria/Gamma	Shewanellaceae	576	5290	BglR	Sbal_1129	A3D1N6_SHEB5	U		Shewanella baltica OS155	325240	Beta-glucosides utilization	Beta-glucoside	MATIYDVSVLAGVSLATVSRVMNKNTNVSDKTKQKVLDAMAQLDYRPNAIAQSLASNCSNSVGVLVSQLDGPFYGPMMTEIEDALRDAGKHVIIAAGKSNESLEKDAVQFLLDRGCDALIIDVEAVSDDYLIDLCKRSTPIVLINRYVAAIRERCIYLDNELGGYLATQHMLSLGHEHIAYISGPLFKLDARQRLMGHKKALTESAIPYESELFYEGTFKESSGCDGMRHLLSLQRPFTAVICANDQMASGAISTCLEQGLKVPEDLSFMGYDNIPFPQYISPKLTSVSNPIHEMGKMAAFWVLKHVYNKTDVEIVSHFTPSLFVRDSAVKREK
Proteobacteria/Gamma	Shewanellaceae	576	5294	BglR	Sden_2609	Q12KY8_SHEDO	U		Shewanella denitrificans OS217	318161	Beta-glucosides utilization	Beta-glucoside	MATIYDVSIMAGVSLATVSRVMNNNTKVSDKTKQKVLDAMQALGYRPNTIAQSLASNRSNSVGVLVSQLDGPFYGPMMTEIETALRSANKHVIIASGHSDEKQEKEGVEFLMSRGCDALILDVEAVSDQYLIELSQGSTPVVFINRYIDAIKERCVYLENEMGGYLATQHILSLGHKALAYISGPLFKLDARDRLQGHKRALAEFNIAFDPELCVESNFREFGGSDAMEHLLSLNKPITAVVCANDQMASGAISVCLARGLRVPDDISFIGYDNIPFPQYISPKLSTVSNPINEMGKMAARWVLQQVYNDKNVVVESSFQPELFIRDSSQALALSNVNANTP
Proteobacteria/Gamma	Shewanellaceae	576	5295	BglR	Sfri_1314	Q084Z8_SHEFN	U	*	Shewanella frigidimarina NCIMB 400	318167	Beta-glucosides utilization	Beta-glucoside	MLVLEPCAPRWLLNTHYMATIYDVSVMAGVSLATVSRVMNNNTKVSDKTKQKVLDAMKALGYRPNTIAQSLASNCSNSVGVLVSQLDGPFYGPMMTEIETALRTANKHVIIAAGHSDEKQEKEGVEFLMSRGCDALILDIEAVSDDYLIELSKGSTPVVFINRYIDAIKERCVYLENEQGGFMATEHILSLGHKDIAYISGPLFKLDVRDRLKGHKRALQQYNIDFDDTLCIESDFKEAGGCEAMERLLSMNKTITAVVCANDQMASGAIAVCLEHGIRVPDDISFIGYDNIPFPQYISPKLSTVSNPIHEMGKMAARWVLQEVYNDKEVIVESSFKPELFIRSSSQAISHD
Proteobacteria/Gamma	Shewanellaceae	576	5300	BglR	swp_1632	B8CL84_SHEPW	U		Shewanella piezotolerans WP3	225849	Beta-glucosides utilization	Beta-glucoside	MNKNAKVSEKTLKKVQDAMDQLGYRPNAIAQSLASNRSNSVGILVSELHGPFYGSMLSGIEAELRGSQKHAIIAAGHSEEETEKEGIEFLISRRCDALILHVEAVSDEYLVDLVKNEVPIVLINRFIPAIADNCISLNNELGGYLAAKAILEQGHKEVAYISGPNWKMDASDRLKGHKKALQEFNVTYNPKLTYEGDYQEVGGSDGLEYLLNSKQPFTAVICANDEMASGAMTFAREHRISIPKELSIIGFDNIILAQYIYPKLTTIDYPIKQMGQMAARWILKNTFKQTDLEVKNVFEPKLITRDSILAH
Proteobacteria/Gamma	Shewanellaceae	576	5302	BglR	Swoo_1145	B1KHD0_SHEWM	U		Shewanella woodyi ATCC 51908	392500	Beta-glucosides utilization	Beta-glucoside	MATIYDVSVLAGVSLATVSRVMNKNTNVSEKTKKKVQDAMDQLGYRPSSIAQSLASNRSNSIGVLVSQLDGPFYGPMMTEIETALRDANKHVIIAAGHSNETQEKEAVEFLLDRGCDALILDVEALSDEYIINLCQQSTPIVLINRFISEIEERCIYLNNALGGYLATKHVLSQGHTQLAYIAGPQFKSDARERLEGHKQALAEFEVTFDETLFFEGNFREPSGVSAMEYLLKQDKQFTCVISANDQMASGAIAVSLERDISVPKQLSFIGYDNSPFPKYISPKLSTVSNPIQEMGKMAALWVLKNVYNKPDLSIVNTFTPQLILRDSVKSLK
Proteobacteria/Gamma	Vibrionales	5339	52433	BglR	VIBHAR_06943	A7N5G9_VIBCB	U		Vibrio harveyi ATCC BAA-1116	338187	Beta-glucosides utilization	Beta-glucoside	MATIKDVSEYAGVSQATVSRVINGTCRVSHDKKLKVEKAIKELGYRPNSIAQALASSRTGSIGIIVPELGGPFYSGILHSIEERLRRMGYHVIVTAGSNTEQSQRESVEFLLGRRVDAMILHTQSLSDDYLIDLDNKGIPVVLVNRYIPEMAHSCIEIDNEFGGRMATEYLLRMGHRNIACITGPLDRSDARGRLQGYRKALEEAEIAYDEALVSEAGFTEESGISAMRKLLKRESGFTAVFACNDHMAFGAYEVLKAEGMQVPEQISLVGFDDILFARYLTPALTTVNFPIEQMSAEAVQLVIQALNKNKRDVNFKLTPTLVPRSSVKELNTL
Proteobacteria/Gamma	Vibrionales	5339	52437	BglR	VS_II1392	B7VTD8_VIBSL	U		Vibrio splendidus LGP32	575788	Beta-glucosides utilization	Beta-glucoside	MATIKHVSEHAGVSQATVSRVINGTSRVSHDKKLKVEKAIKELGYRPNSIAQALASSRTGSVGVVVPELGGSFYSGILHCIEENLRRFGYHAVVTAGSNTEQGQRESVEFLLGRRVDALILHTQLLSDDYLIELEEQGTPVVLINRFIPEMAMSCIDIDNEVGGLLATQYLLQKGHTDIACITGPLDKADARGRLQGYRKALEEAGVPYDEALVSEAGFTEETGISAMKKLMNRKCHFTAVFASNDHMAFGAFEVLHQEGLSVPKDVSLVGFDNTIFARYLTPSLTTINFPIEEMSIEAVQLTLQKLKKIKHDVNFKLLPTLVTRNSVSDLPVTL
Proteobacteria/Gamma	Vibrionales	5339	52438	BglR	VV21282	Q8D4L1_VIBVU	U	*	Vibrio vulnificus CMCP6	216895	Beta-glucosides utilization	Beta-glucoside	MATIKDVSEYAGVSQATVSRVVNGSCRVSHDKKLRVEKAIQVLGYRPNAIAQALASSRTGSIGIIVPELGGPFYSGILHCIEEQFRRFGYHVIVTAGNNSEQSQRESVEFLLGRRVDAMILHTQNLSDDYLIELESKGIPLVLVNRFIPELASSCIDIDNELGGRMATEYLLQRGHHSIACITGPLDKSDARGRLQGYRKALEAAGIEYDEALVSEAGFTEESGASAMRKLLNRGQTFSAVFACNDHMAFGAFEVMKEQRIRIPEDVSLVGFDDILFARYLTPALTTVNFPIEQMSLEAVQLTLQILNKNKRDVNFRLSPTLVIRESVNVSSTL
Proteobacteria/Alpha	Sphingomonadales	5575	54653	BglR	NAP1_09737	A3WHM5_9SPHN	U		Erythrobacter sp. NAP1	237727	Beta-glucosides utilization	Beta-glucoside, Glucose	MGRGHKSVTIREVAEDAGVSLQTVSRVINDGPNVRPQMRDKVQASIDRLGYVPSLAAQRMSGSRSYIILAINDRERTLADWRERQGTDWVDQMLLGGILTCSKHGYRMMVELVDTHADHVERELAATIAALQPDGVILTPPHSENPLITTLLEKRSVPFARIGSNREEPGIPMTMGDEGAAYTSTRRLIELGHKRIGIIAGPREYSLSGWRVAGWERAMGEHGLDIHGLNERGDFSYESGTQAARALLDRNPDITAIIGSSDQMTLAALAVVRDRGMHVPRDMSLISFDNTPIVRFSQPPLTAVDQPIAETVSLAVEKLITLKGQPHKGGVIDVKASLVERASTGPAPRSV
Proteobacteria/Alpha	Sphingomonadales	5575	54654	BglR	Saro_1609	Q2G7X4_NOVAD	U	*	Novosphingobium aromaticivorans DSM 12444	279238	Beta-glucosides utilization	Beta-glucoside, Glucose	MGRRRQAVTIKHVAADAGVSLQTVSRVINNEPNVRPEMREKVQASIDRLGYVPSIAAQRMSGSRSYLILALNDRERTIADWRARQGTDWVDQMLLGGMLECAEHGYRLIFELVDTHNDHVERELTAAIAALQPDGAILTPPHSDNPKILAVLARHKVPFARIGAQTSEKGLPPGILVSMDDEGGARTATRHLLDLGHRRIGFISGPTEYRLAGKRVEGWRAEMEAAGLGVDGLLEAGDFTYQSGVRAARALLTRPDRPSAIIASNDQMALATVEIADELGLSIPADLSLVSFDNTPLVRFTRPALTAVDQPIADTTARAVRMLIASHRKPDADMGPVVMPMGFEIRGSTAPFGKGG
Proteobacteria/Alpha	Sphingomonadales	5575	54657	BglR	Sala_0920	Q1GUN4_SPHAL	U		Sphingopyxis alaskensis RB2256	317655	Beta-glucosides utilization	Beta-glucoside, Glucose	MARRRQAVTIKHVAADAGVSLQTVSRVINDEPNVRSAMKARVQASIDKLGYVPSIAARRMSGSRSYLILAINDRDRTIADWTARQGTDWVDQMLLGGMLKCAEYGYRLIFELVDTHSDHVERELRATIAALQPDGVILTPPHSDNPLIVRLLERQRIPFARIGSRGGGAGIALVMDDESMARHATRHLIDLGHRRIAFIAGSSEYPLSQWRVDGWESEMRAAGLPTAGLVARGDFTYESGAAATRQLLGHPDRPSAIIASNDQMALAALEVARELGIEIPSQLSLVSFDNTPIVRFTQPTLTAVDQPVAETVSRAVEMIIKAQRGEKLPPQPVIVAGGFVERESTSAPAHG
Proteobacteria/Alpha	Caulobacterales	5227	51568	BglR1	CC1753	Q9A7H0_CAUCR	U	*	Caulobacter crescentus CB15	190650	Beta-glucosides utilization	Beta-glucoside, Glucose	MTTKRPTIDDVARLSGVARVTVSRVLNGGPNVRDEVRARVMQAVETLAYKVNPQARSLAGGASRLLAFVFASDPENEPNSYYESALELGALRACLALGYQVLVQNVPQQTPDHQKRILDLITTQRCEGLILSPPYSDDVALIEAALAQGCKVVTVSPGGPGRGKADGVGVDDEAGGYDMTRELLRLGHRRFGFIAGLEGHLSADRRLQGFRRALGEQGLGEGDCVVLRGDFTFRSGTRLAPELLDHPLKPTALVCANDDMAAGVLSAAHARGLSIPQDLSITGFDDAPVAGIVWPPLTTVHQPVKVLGQRAVELLVARLTGVNVSDAAIFDELEHAVVTRQTTTAPHL
Proteobacteria/Alpha	Caulobacterales	5227	51570	BglR1	Caul_2062	B0T6X5_CAUSK	U		Caulobacter sp. K31	366602	Beta-glucosides utilization	Beta-glucoside, Glucose	MTLKKPTIDDVARLSGVARVTVSRVLNGGPNVRDEVRDKVMKAVRALDYKVNVQARTLAGGGSRLIAFIFASDLDAEPNSFYQSALELGALRGCLALGYQLLTHHIPEQGADRVRLLTELIVTQRCEGLILTPPFSDDVAMIEAALVLKCKVAAISPGGAGRDLVDSIGIDDEKGGYDIARHLLALGHRRFALIAGIAGHLSADRRHDGVMRALAENGLGEKDIVWRRGDFTFRSGVELAPGLFDDPLGATALICANDDMAAGALSAAHARGIAVPNGLSITGFDDTPVSAIVWPPLTTVHQPLKAMGERAVARLVRSLAGGAGVELLPAHVERLDHLVVARRSSSAP
Proteobacteria/Alpha	Caulobacterales	5228	51572	BglR2	CC0969	Q9A9L1_CAUCR	U	*	Caulobacter crescentus CB15	190650	Beta-glucosides utilization	Beta-glucoside, Glucose	MTTINDVAERAGVSPKTVSRVLNDHESVSAKTRDRVRTAMQDLGYQPSAVARSLRSQGSGSVGVLMGDPSGGYHTRVHHALLVACVETGRHLSVDLSEGPIPGWQDRVRAFVRDGGIREMILLPPECDFGPMKELMRELDVRCVLITPTTPDPQFPAIGMDDRAAAREVVEHLFSLGHTRIGHIAGHPDHAASTHRRNGFFEAYAARGLPRPSPELIVQGEFTFKTGLEAAKALLDIDNPPTAIFAANDDMAAATCMEAQRRGLRIPDDLSVVGFDDAPIAGVIWPSLTTIRQPFEQMALRAMQTFAAWNANEGAGKTNTPFLAQHSLVVRESTGPVRTDAPPRRKT
Proteobacteria/Alpha	Caulobacterales	5228	51573	BglR2	Cseg_3735	D5VNT3_CAUST	U		Caulobacter segnis ATCC 21756	509190	Beta-glucosides utilization	Beta-glucoside, Glucose	MTTINDVAERAGVSPKTVSRVLNDHESVSAKTRDRVQAAMRDLGYQPSAAARGLRSQGSGSVGVLMGDPSGGYHTRIHHALLLACVETGRHLTVDLSDGLAPGWQDRLHAFIRDSGVREMILLPPECDFGAMKDLLRELDVRCVLISPTTPDPRFPAIAMDDRAAAREVVEHLFSLGHTRIGHIAGHPDHAASTHRRNGFYEAYAARGLPRPGPELVVGGEFTFKTGLEAAKTLLDIADPPTAIFAANDEMAAATCMEAQRRGLRIPDDISVVGFDDQPIASVIWPSLTTIRQPFEQMALRALQTFAAWNANEGAGKTNAPFLARHSLVVRESTGPVGSGSPPPRKP
Proteobacteria/Alpha	Caulobacterales	5228	51574	BglR2	Caul_2141	B0T7T1_CAUSK	U		Caulobacter sp. K31	366602	Beta-glucosides utilization	Beta-glucoside, Glucose	MATIHDVALQAGVSPKTVSRVLNDHESVTAKTRERVRGAMQALDYHPNAVARGLRSHAAPAVGILMGDPSGGYQTRIHHALMVACLQNGRHLSAELVEGDMAGWQDRIRAFVTEGGIREMILLPPECDFAPLKTLLREHDVRCVLISPTSPDSQSPSIVMDDRAAAREVVEHLFSLGHERIGHIAGHPDHAASTLRRNGFNEAYAAAGKPRPDPALIVPGDFTFKGGLAGAQALLDMENPPTAIFAANDDMAAATCMEAQRRGLRIPDDLSVVGFDDAPIAAAIWPSLTTIRQPFDQMTQRAITALGAWNANAALGKSAATILTKHSLVVRESTGPVRAG
Firmicutes	Listeriaceae	5480	53562	BglR2	lin0539	Q92EC1_LISIN	U		Listeria innocua Clip11262	272626	Beta-glucosides utilization	Beta-glucoside-6-phosphate	MANIQEIAKLAGVSSATVSRVINNRDYVSEETRKRVQTIIDKLDYVPNINAVSLKKGATKLIGMVIPSFTDSLNVFLKSFTMMAQEHGYNVTLFMTRIDPDKELEALEMLRQKQIDALVLVIRSNDWKTIEHYTKYGPIVTWQRVESEKIPSVFMNQYDGYTLALEHLYAKGYRKFVNVYGNTTGLNTQSRMLAFKDFCARYELDPHEFRQFYGQGSRQDGEKIAHWWSETEHKPDAFLTPNDYFAAGLLTEARRLGYSVPEDFAICGFDNMEVAHLLDITTIHYPVNLQAENAFTLIMNQLFGSNLPLLDLDFHLVERKTT
Firmicutes	Listeriaceae	5480	53563	BglR2	lmo0535	Q8Y9J2_LISMO	U	*	Listeria monocytogenes EGD-e	169963	Beta-glucosides utilization	Beta-glucoside-6-phosphate	MANIQEIAKLAGVSSATVSRVINKRDYVSDETRKRVQTIIDKLDYVPNINAVSLKKGATKLIGMVIPSFTDSLNVFLKSFTMIAQEHGYNVTLFMTRIDPDKELEALEMLRQKQIDALVLVIRSNDWKTIEHYTKYGPIVTWQRVESEKIPSVFMNQYDGYTLGLEHLYAKGYRKFVNVYGNTTGLNTQSRMLAFKDFCARYELDPHEFRQFYGQGSRQDGEKIAHWFAETEHKPDAFLTPNDYFAAGLLTEARRLGYSVPEDFAICGFDNMEVAHLLDITTIHYPVNLQAENAFMLIMNQLFGSDLPLLDLDFRLVERKTT
Firmicutes	Listeriaceae	5480	53564	BglR2	lse_0448	D3USD6_LISSS	U		Listeria seeligeri serovar 1/2b str. SLCC3954	683837	Beta-glucosides utilization	Beta-glucoside-6-phosphate	MANIQEIAKLAGVSSATVSRVINKRDYVSEETRKRVQTIIDQLDYVPNLNAVSLKRGTTKLIGMVIPSFTDSLNVFLKSFTMIAQEHGYNVTLFMTRIDQDKELEALEMLRQKKIDALVLVIRSNDWKTIEHYTKYGPIVTWQRVESEKIPSVFMNQYDGYTLALEHLYEKGYRKFVNVYGNTTGLNTQSRMLAFKDFCERYDLDPHEFRQFYGLGSRQDGEKIAHWWEETAHKPDAFLTPNDYFAAGLLTEARRSGHRIPEDFAICGFDNMEIAHLLDMTTIHYPVNLQAENAFMLIMNKLFGSDLPLIDLDFHLVERKTT
Firmicutes	Listeriaceae	5480	53565	BglR2	lwe0495	A0AFY1_LISW6	U		Listeria welshimeri serovar 6b str. SLCC5334	386043	Beta-glucosides utilization	Beta-glucoside-6-phosphate	MANIQEIAKLAGVSSATVSRVINKRDYVSEETRKRVQTIIDKLDYVPNINAVSLKKGATKLIGIVIPSFTDSLNVFLKSFTMMAQEHGYNVTLFMTRIDPDKELEALEMLRQKQIDALVLVIRSNDWKTIEHYTKYGPIVTWQRVESEKIPSVFMNQYDGYTLALEHLYAKGYRKFVNVYGNMTGLNTQSRMLAFKDFCARYELDPHEFRQFYGQGSRQDGEKIAHWYGETEHKPDAFLTPNDYFAAGLLTEARRLLYNVPEDFAICGFDNMEVAHLLDITTIHYPVNLQAENAFTLIMNQLFGSNLPLLDLDFHLVERKTT
Proteobacteria/Alpha	Caulobacterales	5606	54979	BglR3	CC2316	Q9A5Y1_CAUCR	U	*	Caulobacter crescentus CB15	190650	Beta-glucosides utilization	Beta-glucoside	MSSVTIYDVAAKAGVSIKTVSRVMNNEPNVRPVMRERVLAAAGELGYSPNLSARSLAGSRSFVIAVFVDAALTIDHWQSERGADYLSRIQLGATLVCRDAGYHLLIELIDHEGPQVRQEVAALLAALKPDGVILTPPSSDNAVVLELLDRAGTPYVRVGPERAEGLGPRVHMDDVAAAREMTDHLIGLGHKRIGFIVGEPRYGASQARRDGYLEAMRAKGLSVPEFWVRQGDFTFQSGLEQAKALLALPERPTAIFASNDDMALGAIAAIADAGLMTPGDVSVAGFDDSPSSRFSRPQLTTVRQPVAEMSSVAAKLLIERSRGGASTERPVDELLPFTLIHRASTAPPPR
Proteobacteria/Alpha	Caulobacterales	5606	54980	BglR3	Cseg_3095	D5VM12_CAUST	U		Caulobacter segnis ATCC 21756	509190	Beta-glucosides utilization	Beta-glucoside	MASVTIYDVAARAGVSIKTVSRVMNKEPNVRPAMRDRVLQAAGELGYSPNLSARSLAGSRSFVIAVFVDAALTIDHWRSERGADYLSRIQLGATLECREAGYHLLIELIDHEGPQVRQEVAALLAALKPDGVILTPPSSDNAVVLELLDKAGTPHVRVGPERAEGLGPRVHMDDVAAAREMTEHLIGLGHRRIGFIIGEPRYGASQARREGYLAAMAAHDLPVSDGWVRQGDFTFQSGMAEAKALLALPDRPTAIFASNDDMALGCVAAIAEAGLMTPGDVSVAGFDDSPSARFSRPQLTTVRQPVAEMSSVAAKLLITRAKTNEPADRPQDLLLPFELIHRASTAPPPR
Proteobacteria/Alpha	Caulobacterales	5606	54981	BglR3	Caul_3555	B0T744_CAUSK	U		Caulobacter sp. K31	366602	Beta-glucosides utilization	Beta-glucoside	MASVTIYDVAARAEVSIKTVSRVMNNEPNVRPQMRERVLEAAGALGYAPNLSARSLAGSRSFVIAVFVDASLTLDHWRSERGSDYLQRIQLGATVETRGAGYHLLVELIDHDGPKVRQEVGALLAALKPDGVILTPPSCDNAVVLELLDKAGTPYVRLGPEKPEGLGPRVHMDDVAAAREMTEHLIELGHKRIGFITGDQRYGASQARREGYVAAMKARGLKVDKAWIRQGDFTFESGHKAAQALLALAERPTAIFASSDEMALGALAAAAEADLSCPGDISVAGFDDSPVSRLSRPQLTTIRQPLVEMSSLATRMLIKGVARHVPAESRPPRDELLPFTLIHRASTATPRG
Proteobacteria/Alpha	Caulobacterales	5606	54982	BglR3	PHZ_c2927	B4R8X1_PHEZH	U		Phenylobacterium zucineum HLK1	450851	Beta-glucosides utilization	Beta-glucoside	MGAVTIYDVAERAGVSIKSVSRVLNGRPNVTEELRRKVQEAADALGYRPSLSARGLAGARSYLIAALVDAELTIEHWRSGRGNDYLSRMELGALMECRQAGYHLLIELVDVASPTLERDILAMVSSLRPDGLILTPPVSDSTVVLDALDSRGAAYVRLGAEREPSRGGRVWMDDRRAAYDMTVHLIRLGHRDIGFVVGHPRYAASRARRAGFEAAMGDHGLAVRAEWVAEGDFTFPSGLACAERILGAARRPTAIFASNDDMAFGVVQAAARLGLSIPRDLSVAGFDDAPGAQFSTPQLTTVRQPVSEMAEAAARMLIAGAAGQAAPGPAEVAYALVLRDSTAAPRG
Firmicutes	Bacillales	5319	52246	BH1250	Aflv_2275	B7GF00_ANOFW	U		Anoxybacillus flavithermus WK1	491915	Sugar utilization	null	MATIEDVAKLTGLSRTTISRVINNHPYVSEEKRKLVLEAMEKLGYVPNSSARSLRNQRTSILALFIPRITNPFFSELVEATEIAAAEHGYQLIVCQTRYSPEKELNYMNLLKTKQVDGVILASIQNEWKQLKPFLQYGPIVLCNEFDDCANVPTVRLDQVYGGYIATKHLLEQGHTKIAYCSGGYRSNVAKSREEGFKKALAEYKLTFDERYAFRDAFHIADGKRVFQQMMMLSDRPTAVFTGSDEVAAGIISEALRCGYRIPEHLAVVGFDNQAITELTNPTITTVHQPVKQMAQKAVDLIVEKIQTKKYDAKEIYEFPLQLIIRASTVGSKLHKSEA
Firmicutes	Bacillales	5319	52248	BH1250	BC1083	Q81GV2_BACCR	U		Bacillus cereus ATCC 14579	226900	Sugar utilization	null	MINNHPYVSDEKKKRVQLAMKHLGFVPNSAARRLRKQKTETIAVLVPRITNPFFSRFIEAIEIAASEHKYKLIICQTRYLPEKEMEYLQLLSTKQVDGIILCSLENPWEDVEPYLQHGPIVLCNEYIEEANIPTVKFDHAQGAYIAAKHVLDQGYRNLIFCRGNETKVVSQQRKMGFLRAITEKSRQVEAIDFLENAFSWEDGKRIFHEVLKDKKNPTAILAGGDEVAAGIISEAKRHNWSIPDDLAVIGFDNQILSQITEPGITTIEQPIDEMARKVVDLMMDKIHTKNYRKKELYEFELELLVKGSTMKDKMLLA
Firmicutes	Bacillales	5319	52249	BH1250	ABC1572	Q5WHP8_BACSK	U		Bacillus clausii KSM-K16	66692	Sugar utilization	null	MPTIKDVALRAGVSRSTVSRVMNNQPYVDEEKRKAVKQAMKELGYLPNSSAQRLRGTETRTIAVLVSRIVNPFFSAIVDAMDEVAAEQSYRLILCNTRGSANQELHFLQLLRTKQVDGLILASLVNDWETIAPYTDYGPIVICNEYPRQSDGVPVVTIDQSKAMYEATVHLLKKGYKQIAYCNPITKTESDAVISPLAQDRYLGFCQAMEEAGMHMYGECLFLGHSLEDGRNIFKQMVCLANRPDAILTGSDEVAAGIIAEAKAAGWKIPDDLAIVGFDNQPHATLIEPELTTIHQPVQEMGRAAMERMLALLRKESPPPLATYLEAPLLARKST
Firmicutes	Bacillales	5319	52250	BH1250	BH1250	Q9KDG3_BACHD	U	*	Bacillus halodurans C-125	272558	Sugar utilization	null	MATIKEVAQLAGLSRTTVSRVINNHPYVSDEKRQQVLDAMKQLGYVPNSSAQRLRRNKTETIAVVISRIVNPFFSGLVDEMERVASEHGYQLILCNTRQSKEKELSYLELLRTKQVDGIIMASMQNEWEVIEPYTAYGPMVACNEYRPGMSIPLVRLNQEEAGYVATKHLLELGHRKIACLAGNKAIPLSEDRKAGYLRALQEYGIKVKEEWTYYHAFSIDDGKRWFRLFQTIETNTRPTAVFTGSDEVAAGILSEAKVHGWNIPKDLAIVGFDNQQIATLVTPRLTTIEQPISLIGRRALEVMFMLLDEQINDLPPFEERLPFRLIVRESTVLAINM
Firmicutes	Bacillales	5481	53569	BH1516	ABC3478	Q5WC99_BACSK	U		Bacillus clausii KSM-K16	66692	Maltose utilization	null	MNKPTIKDVAKEAGVSIATVSRVLNNGIGYSIKTKQHVLKTIEEMGYSPNAIARGLINKQSNTIGVLFPEISGLVSAEILQGIEEAAHARGKSIVICNTASSGHKTKEYLKLLQEKQVDGILFASQLLTLEYVAIVRKMGVPVVTVSAYSEDPTIPAVQVDNETAAYDAVCYFIQQGHTEIGMISGNPSDLLAGAPRMAGYKRALKEAGIAYVPTKVAWDKGFYFEDGQKAFQRLYTDHPNLTAIFSASDELAIGAMSAATAKGLRIPEDLSVIGFDGTKLAKMAVPPLTTVSQHFFSMGKTAANLLFDSIATGQASSGRIIRHELIKRHSVQMPSSTKTMD
Firmicutes	Bacillales	5481	53570	BH1516	BH1516	Q9KCQ3_BACHD	U	*	Bacillus halodurans C-125	272558	Maltose utilization	null	MNRPTIKDVAREANVSIATVSRILNKGVGYSEKTKQHVLETIEKMGYHPNAVARGLINKKTDSIGVLFPNVSGLISAQILQGIEEVAQSHGISVIVCNTASDHKKTMDYLTFLQEKQVDGLLFISQLLTKDYREFIKKMGVPIITISAFSETNDVPYVKVDDEAASYDAVRYLIEKGHTDIGMISGPPTDPLAGHPRIQGYKRALREADLPFIETKMTWHKGFYFEDGQVAFQKLLKSHPSITALFAASDELAISAVSSAYHLGIRVPHQLSVIGYDDTKLAKMSIPPLTTVSQPFEEMGAQATKKLIDSIQSREPNTSLTMPHRIAERESVKNRMAAPNGHV
Actinobacteria	Bifidobacteriaceae	5315	52219	BL0426	BDP_1707	D2Q5T4_BIFDB	U		Bifidobacterium dentium Bd1	401473	Sugar utilization	null	MDKDIHLTSRLEDVATLANVSLATASKALHGKPRVSEQTRQRVIAAAHQLNYSPNKLAQSLAKGHSGTIGLITSDLQGRFSTPILIGAENELRTQSTSVLLANARGDDALERIHVEKLLSLKVDGLLIVQRETNPRSSLGHDWGVPLVYVYGPSTDTDDCSVTCDNVEAGRMAVNHLISCGKHKIAIIGGDETYTATADRTKGAMEALAEVSLEPAGPIRYGRWDENWGRAATRLLLDQDVDFDAVVCQSDQLARGCIDALKEANLRIPNDVAVIGHDNWDVLATSSRPPLTSIDNDTEQIGRRAARYLMDAINGNPHHGVDYLPCRLIQRESTLPID
Actinobacteria	Bifidobacteriaceae	5315	52221	BL0426	BL0426	Q8G746_BIFLO	U	*	Bifidobacterium longum NCC2705	206672	Sugar utilization	null	MMTQPATGRAARLEDVAALAGVSTATASKALHNKPRISEETKQRVLDAAKQLNYSPNKLAQSLARGTTGTIGLVTSDLQGRFSTPILIGAENELRAQSTSVLLANARGDAALERQHVEKLLSLKVDGLLIVQCETNPRPTLGHDWGVPLVYVYGPSTDPKDCSVTCDNVDAGRMAINHLISCGRRHIAIIGGDETYTAATDRTKGALEALSELGIEPAGPIRYGKWDEGWGRAATRLLLDQGVKFDAVVCQNDQLARGCIDVLKQQGLRIPDDVAVIGHDNWSVLTSSSRPALTSIDNETETIGRRAARYLVDAIDGNPHHGVDYVPCHLIQRESTLPLD
Proteobacteria/Alpha	Rhizobiales	5637	55261	bll3974	Atu5239	Q7D3K0_AGRT5	U		Agrobacterium tumefaciens str. C58 (Cereon)	176299	null	null	MRMAKAAENETGGIIYDEVVRIPARSPRAAATALLEDNAPLETASIGDVARLAGVAPITVSRALRNPEKVSAEKRARIEAAVERTGYRVNPFASALKSGRSNVVMAFASNMFSEQFALALHACANVLEEAGYLFLVGQTSYSYDRETAAIRSLQALKPAAVMFTGVIELEQNRETLRNLGIPIMETWAFPRDPIDMLVGFSNTEAGRLAAEALADGGYKKVGFIGRRGGRGALRLKGFRDSCRDLGLEFVGEFLSDEVAGPSDGRRCLSTLLESGASVDAVFCANDLLALGTLMEARRRKLSIPKDFGVIGFGESDIAAEIPPGLTTVGIDSAQLGKIVGEMLLNRLSKGEIAAPIRRVDLLVTHRGSV
Proteobacteria/Alpha	Rhizobiales	5637	55264	bll3974	bll3974	Q89N68_BRADU	U	*	Bradyrhizobium japonicum USDA 110	224911	null	null	MTDPAKPNYDDVVRIPAPPGRASATGRPPRIAEVAERAGVSPITVSRVLRHPQKVNRKTRERILEVIEATGYASNPHARALRSGRSNVVVAFVSNILSQQFGLAVRSFAATLEPEGFEVLVGQTSYSYVKEVAMIQSLRGIRPAAVMFTGVIELEENRAALAELGIPVIETWAFPRDPIDMLVGLPNADAGAMAARRLAEAGHRRVAFIGRSSGRGALRRDGFRTAAAQLGLDIVHEIGVGEITGLIDGRAAFTALLDRGDRVDAVFCANDLLATGALIEARARGLSVPRDLAVLGFGDNDVADQITPGLTTISFDAAAVGRIAAELLLARLSGTQLAEQRIAVDLFLVERGSV
Proteobacteria/Alpha	Rhizobiales	5607	54986	blr3394	blr3394	Q89PT6_BRADU	U	*	Bradyrhizobium japonicum USDA 110	224911	Sugar utilization	null	MTAGAAQPVLRATLEDVARAAGVSLATVDRVVNRREGVRAKTVARVEAAVAKLGYRADVAAARLARGQTFRFAFVLPTGSNSFMTNLTEQVQRTADWLAGQRGFIDILHVDVFDPDVLASALENLSPAYQGVAVIALDHPRVRAAIDELAGRGVAVVTLVSDAPSSRRLHYVGIDNPAAGRTAATLMGRFLAGNEGTVAVIAGSLSLRDHTERQFGFHQILSSEYPDLRALPVIEGRDDSDRTRKLTAALLARHADLRGIYCCGAGNRGIADALEASGRAREVVWITHELTQYTRRFLVRGTLDAIINQDPGHEARSAARVLLAHCSGEPISPDQERIRIDIFLRDNLP
Proteobacteria/Alpha	Rhizobiales	5607	54987	blr3394	BBta_3990	A5EIR5_BRASB	U		Bradyrhizobium sp. BTAi1	288000	Sugar utilization	null	MTVGATPSPVRATLEDVARTAGVSLATVDRVINRREGVRAKTVARVEAAVAKLGYRADIAAARLARGQSFRFAFVLPTGGNSFMTNLTEQVQRTAEWLAGQRGFIDILHVDVFDPDVLAGTLETLSPAYQGVAVIALDHPRVRAAIDELAARGVAVVTLVSDAPSSRRLHYVGIDNPAAGRTAATLMGRFLGGRDGTVAVIAGSLSLRDHAERQFGFNQILCSEYPSLRALPTIEGRDDSELTRQLTAELLARHSDLRGIYCCGAGNRGIADALEASGRAREVVWITHELTQHTRRFLVRGTLDAIINQDPGHEARSAARVLLAHCSGEPISPDQERIRIDIFLRDNLP
Proteobacteria/Beta	Burkholderia	5317	52230	Bphy_2245	Bphy_2245	B2JEV5_BURP8	U	*	Burkholderia phymatum STM815	391038	Sugar utilization	null	MPGSARGGEGLSIAGVAQRAGVSVATVSRVLNGHSNVRPETRDKVLTAVATSGYRVNELARNLRTAESRLLLTMVPDVGNPFYAEVIRGIDFVARQHGYFMLLCDTGADPGRERSYFDLLRRRRADGAICLDPATVQQALAEESNALPWVACCEFDSSVGVPYVGIDNYRAAGDAVRHLLARGHRRVALINSDDHYLYAQQRQQGYMDALRDAGIAPDERWRINVNSLDYEAGASAAALLMTYADAPTAVFAVSDTLAIGVMSGLRRVGKRVPHDVAVVGFDDISLAAQIDPPLTTIAQPMRELGETAARLLLQRLANRNENVPGVLLPHRLVVRQSA
Proteobacteria/Beta	Burkholderia	5317	52234	Bphy_2245	Bxe_A3676	Q144C6_BURXL	U		Burkholderia xenovorans LB400	266265	Sugar utilization	null	MAEQAGVSVATVSRVLNGHENVRPATRDKVLAAIDASGYRVNELARNLRTAESRLLLTMVPDVGNPFYAEIVRGIDSVARQHGYFMLLCDTGADPGRERSYFDLLRRRRADGAICLDPATIQQALGEASGALPWVACCEFDPAMGVPYVGIDNYRAAGDAVRHLLARGHRRIGLINSDVDYLYARQRQQGYLDALTEAGITPDERWRMNLNSLDYEAGASAAATLMNQPQAPGAIFAVSDTLAIGVIHGLRSVGKRVPDDIAVVGFDDISLAAQIDPPLTTIAQPMRELGETAARLLLQRLANPLANVPGVLLPHRLVIRGSA
Proteobacteria/Beta	Burkholderia	5287	52012	Bphy_4590	Bamb_1342	Q0BG23_BURCM	U		Burkholderia cepacia AMMD	339670	Sugar utilization	null	MSTPPSSGGAARARRGSGRSVLGDVAKLAGVSTATVSRVYNDPGKVSADVQQRVRDAARALNWIPNAAGRALASTRTHITGAIIPTLDDQVFASQVAGMQAVMAEHGITLFLGCSNYDPAQALAQVRAMLSRGVEAVSLVGEAYPPEVFELLHQHRVPYVVTYAYRDDSPHCCIGFDNRAAFARLTTHLLDLGHRDFAIIMQPSADNDRVQARLRGIHDTLAARGLAVRPVHQHEGAATIAFGRVSLRAIADSGATRPTAVICGNDALALGALLEAQALGLDVPSQLSITGFDDVALAREIRPSLTTMWVDTAAIGRKAAHALLDALGNGETGPGYAVQPELRVRESAAPPPPVPAAE
Proteobacteria/Beta	Burkholderia	5287	52013	Bphy_4590	bglu_2g08870	C5AHB7_BURGB	U		Burkholderia glumae BGR1	626418	Sugar utilization	null	MPAQRSTGARARRGSGRAVLSDVAKRAGVSTATVSRVYNEPGKVSERVRARVEQAALELNWFPNAAGRALASTRSHIAGIVIPTLDDQVFASLVSGMQASFAARGITLFLGCSNYDPNEALSQVHAMLARGVEAIAVVGEAHPPALFDALRVWRVPYVVLYAWREGSPHDCIGFDNHAAYGEITEHLVGLGHRAFAVCLQSTHGNDRVQARLAGIGAALARHGLTVRPEHRFEGDATLDFGRRALRSIWQQAGPRPSAIICGNDHIALGVLREAEELGIAVPGQLSVTGFDDLAIAREARPSLTTMHVDTREIGVVAARHLLDALDGKPRRHGHVVPAVLKMRGSTGPCSGS
Proteobacteria/Beta	Burkholderia	5287	52015	Bphy_4590	Bphy_4590	B2JR10_BURP8	U	*	Burkholderia phymatum STM815	391038	Sugar utilization	null	MSSSHSSAASDTPVARTRRRSGRAVLGDVARLADVSTATVSRVYNEPDKVSPSVRERVLQAAAALNWIPNAAGRALASTRTHIAGAIIPTLDDQVFASQVAGMQAVFAERGITLFLGCSNYDPAQALIQVRAMLARGVEVIAIVGEAHPPELFDALKQARVPYAITYAYREGSPHHCIGFDNRAAFVAIAEHLLALGHRTFAAVIQPARDNDRVQARVAGIREALERHGIAVRPSHLHEGPATIAFGRQSLRAIWQGADERPTAIICGNDQLAIGVLLEAAELGIKVPQQLSVTGFDDVAIAQQIHPSLTTVRVDTAEIGRRAARYLLDVLDGKEAAESGLVQPELMVRESTARVRKAD
Proteobacteria/Beta	Burkholderia	5287	52017	Bphy_4590	Bcep18194_C7624	Q39LJ8_BURS3	U		Burkholderia sp. 383	269483	Sugar utilization	null	MSSPPSRAGAPRARRGSGRSVLGDVAKLAGVSTATVSRVYNDPGKVSADVQQRVRDAARTLNWIPNAAGRALASTRTHITGAIIPTLDDQVFASQVAGMQAVMAEHGITLFLGCSNYDPAQALAQVRAMLSRGVEAVSLVGEAYPPELFELLAMHRVPYVVTYAYRDDSPHCCIGFDNRAAFARLTTHLLDLGHRDFAIIMQPSADNDRVQARLRGIHDTLAARGLAVRPVHQHEGAATIAFGRASLRAIAGSDAATRPTAVICGNDALALGALLEAQALGIDVPAQLSITGFDDIALAREIQPPLTTMWVDTDAIGRQAAQALLDALENGATGPGHAVLPELRTRESAAAPAQVQVARKK
Proteobacteria/Beta	Burkholderia	5287	52018	Bphy_4590	Bcep1808_1422	A4JDS7_BURVG	U		Burkholderia vietnamiensis G4	269482	Sugar utilization	null	MSTPSSGGGAARARRGSGRSVLGDVAKLAGVSTATVSRVYNDPGKVSADVQQRVRDAARTLNWIPNAAGRALASTRTHITGAIIPTLDDQVFASQVAGMQAVMAEHGITLFLGCSNYDPAQALAQVRAMLSRGVEAVSLVGEAYPAEVFELLDLHRVPYVVTYAYRDDSPHCCIGFDNRAAFARLTTHLLDLGHRDFAIIMQPSADNDRVQARLRGIHETLAARGLAVRPVHQHEGPATIAFGRASLRAIADSGPTRPTAVICGNDALALGALLEAQAMGIAVPSELSITGFDDVALAREIRPALTTMWVDTDAIGRKAARALLDALEHGAVGPGCAVLPELRVRESAAPPHSEAP
Proteobacteria/Beta	Burkholderia	5314	52209	Bphy_6994	Bphy_6994	B2JTU7_BURP8	U	*	Burkholderia phymatum STM815	391038	NULL	null	MSTIQDVARQAGVSVSTVSNVLNGRTGQMRQETLVRVQAAMSALQYRPSTLARQLKTGQTPLIGLLVPSIANPMYGYIAREVETYAQERYGYRVMIGNTYRDPAKEASFFEDLLSQGVRRVIVISSLANERHLETAVEHGMVVVSYDRRATEGETTRVEHVTPDNFEAARIATRHLIAHGHTQLAFATLTGVTMSRRDKINGFLSAAQDAGLSEDARVLDSGPVNEYGDSMIVENGRALARLLAADDARPTGIVAVNDLMALGLMAGLRECGLRVPEDVSIVGMDGHFLAAISNPALTTVQLPVPAMAAAMVERAMRPHAEPVPASEQALFTDIKLVARESVARPGKTAAKAKQSGKAG
Proteobacteria/Beta	Burkholderia	5314	52211	Bphy_6994	Bcep18194_B1311	Q397D6_BURS3	U		Burkholderia sp. 383	269483	NULL	null	MSTIQDVARHAAVSVSTVSNVLNGRTDQMKQETLERVKAAMEVLQYRPSTLARQLKTGQTPLVGLLVPSMANPMYGYIAREVEACAQERYGHRVLIGNTYRDAKKEASFFDDLFAHGVRRVIVISSLADESHLERAAERGMTVVSYDRRATPGELSKVEHVTADNEAAARLATRCLVDAGHRRLAFATVAGMTVSRSDKIRGFLETARDAGIEAHAQVLDGGPANEYGDAVIVDVGRALGVALAADPARPTGIVAVNDLFALGLMAGLRDGGLRVPDDVSVVGMDGHFLSAISNPALTTVQLPVTEMAEDMVRRVMRSDGDTPLAPESHVFSGVTLIERASVASPPPADHAQGGAA
Chloroflexi	Chloroflexi	4804	47639	Caur_1157	Cagg_1685	B8GA71_CHLAD	U	*	Chloroflexus aggregans DSM 9485	326427	Beta-glucosides utilization	Beta-glucoside	MHITLDEIARRAGVSRSTASRVINNHPHVNPAVRERVWQAIRETNYQPNLPARSLASRRSQVIGIIIPQPIHTLFADPYFPLLIEGIAQVCNERQFSIMLELATNPTGDPYRHIGRQGFLEGAIVASAIEDHFLSQWLAQESIPVVSIGRISTHPAIPYVDVDNRQGARMMIEHLLRCGYRRIATITGPMNIVAGRDRFAGYCDALDAAGLPLLPELIVEGNFSEQSGFSAMQSLLQREPRPDAVFAASDMMALGAFKALRAVGLSVPDDIGLGGFDDIPLAAAMTPTLTTVRQPINELGQTAARLLLDRITTAARDLAVERVILPTTLVIRESCVR
Chloroflexi	Chloroflexi	4804	47638	Caur_1157	Chy400_1181	B9LAQ6_CHLSY	U		Chloroflexus sp. Y-400-fl	480224	Beta-glucosides utilization	Beta-glucoside	MHITLDEIARRAGVSRSTASRVLNNHPHVNPAVRERVWQAIRETNYQPNHPARSLASRRSQVIGIIIPQSIHTLFADPYFPLLIEGIACVCNAREFSIMLELATNTTGNPYRHIGRRGFLDGAIVASAIEDEFLAQWLQQETLPVVSVGRISSHPVIPYVDVDNRHGARMMVDHLIRRGYRRIATITGPMNIVAGRDRYAGYCEGLAAAGLPVQPELVVEGNFSEQSGFAAMQMLLQLDPLPDAVFAASDMMALGAFKALRAADLVVPRDIALTGFDDIPLAAAMTPALTTVRQPINELGQTAARLLLDHLIIASSEPAPQRVILPTELIIRESCIRDSERG
Chloroflexi	Chloroflexi	4804	47640	Caur_1157	Haur_0297	A9B7H6_HERA2	U		Herpetosiphon aurantiacus ATCC 23779	316274	Beta-glucosides utilization	Beta-glucoside	MEQLTIRQIAQLANVSRSTVSRVINNHPSVRPEVRQRVLEVIREQDYVPQAAARSLASRRTNVVTLLIPRSSAIIFTDPFFPLIIQGITETCSERDYSVMLSMVTGTQERDFYQRVLRSRMTDGLLMLSSDIDDPVLPLLINDQMPLVLIGEHPYMQPMYTVDVANRAGAVLAVSHLLQLGHRRIGAITGLLQMKTAIDRRDGYKQALLQAGVAIEHSLMIEGEFTQEGGYAAMRQLLSLEQRPSAVFVASDTMALGALRAIYEAGLHAPHDISLIGFDDVPGAAYTTPALTTIHQPIQKLGSTAATMLLDHLEGRPPLQQHIRLSPSLVLRQSCGPRVA
Chloroflexi	Chloroflexi	4803	47633	Caur_3448	Cagg_0275	B8G2R9_CHLAD	U	*	Chloroflexus aggregans DSM 9485	326427	Sugar utilization	null	MATIRDVARRAHVSTATVSYVLNGTGVVSEATRERVLAAIAELGYQPNHSARSLRTRSRTIGVVAPGIAGRLADPATAEIIAGLSEAATTAGYCLLLAAPTDTESETELAVRLARSGRVDGLVLFDLQIEDDRPALLTAARVATIAIGAPVAGVTCPIVGCDLRTGAEQATQHLIRLGHRRIALLAAPSYLSISEPFYAGYSAALHAAGLRREAALVIEAGSSEDDGMVAMQELLAARTPPTAVLAASDMLAFGAMHAIRDVGLTVGRDISVVGCDDLPLAAHTFPPLTTLRAPRRDLGATLARYLIAHIEQRPAPPVTLLPLRLVIRHSTAAPSRAVH
Chloroflexi	Chloroflexi	4803	47634	Caur_3448	Chy400_3712	B9LDW3_CHLSY	U		Chloroflexus sp. Y-400-fl	480224	Sugar utilization	null	MATIKDVARRAQVSTATVSYVLNGTGVISEPTRARVLAAVAELGYQPNHSARALRTRSHTIGIVAPGIAGRLADPATAELLAGLSEAATTAGYCLLIASPTPAESEDELALRLARSGRVDGLVIFDLRRNDERPARLAAAGVPTIAIGAPTPGLSCPVAGFDLRAGAEQAVNHLARLGHRRIALITAASDLSVSEHFYTGYRAALHAHGLRREAALVIEAGSSEDDGVNAMQELLAMRTPPTAVLAASDTLAFGAMHAIRDAGLTVGKDVSVVGCDDLPLAAHTYPPLTTLHAPHRELGTVLARHLIGLVERRNVPDVTLLPLRLIVRHSTAAPVRAAG
Chloroflexi	Chloroflexi	4803	47635	Caur_3448	Haur_0778	A9AXL2_HERA2	U		Herpetosiphon aurantiacus ATCC 23779	316274	Sugar utilization	null	MATIKDVAQLAGVSVATVSYVLNDSMPVSEATRNKVLAAVAKLGYQPHRQGRNLQRQRTLTIGVLLPQANLLCELDLATWLLEATNAATSAGYSLLLQPADSQARGDLADGWISFGTVLDPQLPQIWALAPPFEQPAVLCDAAFAAQRAVETLTHAGMQRIGLITLPRSIPGSARWYLGYRRALRRAGIAFDPALVVEPADNRFHDGVAAYEALAASENDYDGLIVCGNQLATGVVMVDHAKVPLIVSHSNTQRGISGFRWPTELWAHTLVRKLLQQLDGSAIAHRTWLNPSLVIGSLGFKEDLDGFNYV
Chloroflexi	Chloroflexi	4803	47636	Caur_3448	Rcas_1277	A7NIS1_ROSCS	U		Roseiflexus castenholzii DSM 13941	383372	Sugar utilization	null	MKATIKQVAQRAGVSVATVSYVLNGAGVVTDETRRRVLDAIAELNYQPQYAARSMRGRSHTLGVTLPSHPGRLAEPALAEVLSGLADAAAVRGYFLLLATAGADQDETELCLSLARSRRVDGLVLLDMLVDDPRAQALAAAGIPHVCAGPPPAGVDSPSVVIDMRAAAVDAVRHLLSLGHRRIGLIQLPSDLAVSESIVEGYRQALTDAGLPFDPTLVVESGRTEEDGYQAMTELLATSRAPTAVLAGSDELAFGAMHALNDARLIVGRDVALVGLDDLPLAAHVNPPLTAVRQPRRAQGQQLAILLDDAIMKRNASLRMVTLSARLIIRRSSGSAWRAAEGVN
Chloroflexi	Chloroflexi	4803	47637	Caur_3448	RoseRS_0524	A5UQP5_ROSS1	U		Roseiflexus sp. RS-1	357808	Sugar utilization	null	MQATIKQVAQRAGVSVATVSYVLNGTGVVTDETRQRVLDAVAELNYQPQHAARSMRGRSRTLGVTLSALPGRLAEPALTEVLAGVADAAALRGYFLLLATAGADQDETELCLSLARTRRVDGLVLFDMLVDDPRAQALAGAGIPHVCAGPPPAGIDSPSVAIDMHTAAVDAVRHLLGLGHRRIGLIQPPSELAVSEPIVEGYRQALTEAGLPFDPTLVVESGRAEEDGYQAMTELLASPKPPTAVLAGSDELAFGAMHALNDAGLIVGRDVSLVGFDDLPQAAHVNPPLTTLRQPRRVQGQQLAMLLDDVILKRNTSLRTVTLSARLIVRRSSGPAPVS
Chloroflexi	Chloroflexi	5466	53463	Caur_3866	Cagg_0081	B8GC60_CHLAD	U	*	Chloroflexus aggregans DSM 9485	326427	Beta-glucosides utilization	Beta-glucoside	MPTIKDVARRAGVSVTAASYALNRTGTISEETRQRVLQAAEELNYHPNAFARHLKARRSRTIGVFITRFAGAFYEEILDGIHEVILATEYELIVCPETRVERRIFTHRQVDGAIVFDTSITDEQILRLAGPKFPIVVMDRQLEAEHVFPLLLDNRQGVAQAFAHLYRQGLRHLAYVAGAPDSFDNNERMQAFLNEAARHQLSVRVYPGNFTEQSGYAAAQRIIAEGDLPEGVFCANDQMAIGFMRAMHEHGLEAPRDIAVVGCDDILLARYVQPPLSTIGASRREWGGTAAQWLMRYLEHEKVFPPQRIPTSFIARASSLKHPVSLE
Chloroflexi	Chloroflexi	5466	53464	Caur_3866	Chy400_4175	B9LH57_CHLSY	U		Chloroflexus sp. Y-400-fl	480224	Beta-glucosides utilization	Beta-glucoside	MPTIKDVARRAGVSVTAASYALNRTGTISEETRQRVLQAAEELNYHPNAFARHLKARRSLTIGVFITRFAGAFYEEILDGIHEVILATDYELIVCPETRVERRIFTHRQVDGAIVFDTSIPNEQILRLAGPKFPIVVMDRYLENKFVFPILLDNRQGVVQAFNHLYRQGLRRLAYIAGAPDSFDNNERMQAFLNEATRHHLSLRVYPGNFTEQSGYDAARAIIADGDLPEAVFCANDQMAIGFIRAMHEHGLEAPRDIAVVGCDDIQIARYVQPPLSTIGASRREWGGTAAKWLMRYIEHEETSPPQRIPTTFIVRASSLKRPELLE
Proteobacteria/Alpha	Caulobacterales	5233	51617	CC1627	CC1627	Q9A7U3_CAUCR	U	*	Caulobacter crescentus CB15	190650	Sugar utilization	null	MATIQDVAREAGVSTATVSRVFSAPDLVLEATRQKVMEAVQRLGYEPNFAAKSLRTLRTEKILVTVPDISNPFFSQVIRGVEEAALAAGYSVLLGDTRHEEAREEQYALMFRRKEADGLIFLGHRLPDVLAEMLAAKGPRTPIVNGCEFRPGLAVSSAHIDNERAAAEVMDHLYGLGHVRVGVVTGPLASPISSDRLAGVLTAAQRHGRASALRIAIGDFSIESGVRQAGEILDEPGRPTAIFCFSDEMAMGALEAIRQRGLDCPRDISLVGFDDIRFAQYLHPQLTTVRQPKEQIGHEVVRLLLDILAGRSTALQNITLPHQLVVRGSTAPPPA
Proteobacteria/Alpha	Caulobacterales	5233	51618	CC1627	Cseg_2114	D5VJQ0_CAUST	U		Caulobacter segnis ATCC 21756	509190	Sugar utilization	null	MATIQDVARAAGVSTATVSRVFSAPELVIESTRQRVMAAVAQLGYEPNFAAKSLRTLRTEKILVTVPDISNPFFSQVIRGVEEAALAAGYSVLLGDTRHEEAREEQYAAMFRRKEADGLIFLGHRLPEALAEMVAVKGVKTPIVNGCEFRPGLAVSSAHIDNEGAAAEVMEHLYGLGHARIGVVTGPLASPISSDRLSGVLAAAQRHGRASALRISIGDFSIESGVRQAGELLDEPGRPTAIFCFSDEMAMGALEAIRRRGLVCPRDVSLVGFDDIRFARHLDPQLTTVSQPMEEIGHEVVRLLLDILAGRATTLQNVTLPHELVVRASTAPPPA
Proteobacteria/Alpha	Caulobacterales	5233	51619	CC1627	Caul_4613	B0T1X2_CAUSK	U		Caulobacter sp. K31	366602	Sugar utilization	null	MATIQDVARDAGVSTATVSRVFSAPERVLEATRNKVIEAVNRLGYEPNFAAKSLRTLRTEKILVTVPDISNPFFSQVIRGVEDAAMAAGYSVLLGDTHHDEAREEQYATMFRRKEADGLIFLGHRLPDVLADMVAAKGRRTPIVNGCEFRPGLAVSSAHIDNERAAAEVMEHLYGLGHTRVGIVTGPLASPISSDRIAGVLAAAQRQGRASALRMAIGDFSIESGVRQTGELLDEPGRPTAVFCFSDEMAMGALEAIRRRGLRCPQDVSLVGFDDIRFAQYLDPQLTTVSQPMEQIGHEVVRLLLDILADRASALQNITLPHRLVVRSSTAPPPV
Proteobacteria/Alpha	Caulobacterales	5233	51620	CC1627	PHZ_c2158	B4REP3_PHEZH	U		Phenylobacterium zucineum HLK1	450851	Sugar utilization	null	MATIQDVARDAGVSTATVSRVLSAPERVAEATRARVLESVERLGYAPNVAAKSLRTLKTGKILVTVPDISNPFFSQVIRGVEEAATAAGYAVLLGDTRQEAAREDQYALLLRRKEADGLIFLGHRLPPALAELVAAQGAKAPIVNGCEFSPELGVPSAHIDNARAAAEAMEHLYGLGHRRVGVITGPLASPLSRDRLAGVQAAAARRGAWGLNIVQGDFSIESGLAQTLALLDAEPRPTAIFCFSDEMAMGALTALRRRGLSCPADVSVVGFDDIRYARHMDPPLTTVSQPKEAIGHEVVRLLLDVLSGRVDTVRHVTLAHRLVIRASTGPAFGPAAG
Firmicutes	Bacillales	2992	28438	CcpA	Aflv_0458	B7GK85_ANOFW	U		Anoxybacillus flavithermus WK1	491915	Carbohydrate metabolism, Carbon catabolism	Fructose-1,6-diphosphate, HPr, phosphocarrier protein	MIFLHKIAMYDSFRYIECKKGVYVMNVTIYDVAREANVSMATVSRVVNGNPNVKPSTRKKVLEVIERLGYRPNAVARGLASKKTTTVGVIIPDISSIFFAEMARGIEDIATMYKYNIILSNSDQNKEKELHLLNTMLAKQVDGILFMGGDVTEEHVEQFKKSDVPIVLAATIEKNNIIPSVNIDYEQAAYDAVHMLIEKGHKRIAYVTGPLNDPINGLKKLAGYRRALEEANIAYDEALVVEGDYTYDSGMEAYEKLAELAQQPTAIFVGTDEMALGVIHGAQDRGIRIPDELEVVGFDNTRLATMVRPKLTTVVQPMYDIGAVAMRLLTKYMNKEHVDNHIVVLPHRIEYRDSTK
Firmicutes	Bacillales	2992	28439	CcpA	RBAM_026860	A7Z7R8_BACA2	U		Bacillus amyloliquefaciens FZB42	326423	Carbohydrate metabolism, Carbon catabolism	Fructose-1,6-diphosphate, HPr, phosphocarrier protein	MSNITIYDVAREANVSMATVSRVVNGNPNVKPTTRKKVLEAIDRLGYRPNAVARGLASKKTTTVGVIIPDISSIFYSELARGIEDIATMYKYNIILSNSDQNLEKELHLLNTMLGKQVDGIVFMGGNITDEHVEEFKRSPVPIVLAASVEEQGETPSVAIDYEQAIYDAVKLFIDKGHRDIAFVSGPMQEPINRSKKLQGYKRALEEAAIPFNEQFVAEGDYTYDSGMEALQSLMGLDRKPTAILSATDEMALGIIHAAQDQGLSIPDDLDIIGFDNTRLSLMVRPQLSTVVQPTYDIGAVAMRLLTKLMNKEPVEEQIVELPHRIELRQSTKS
Firmicutes	Bacillales	2992	28440	CcpA	BC4672	Q816Y7_BACCR	U		Bacillus cereus ATCC 14579	226900	Carbohydrate metabolism, Carbon catabolism	Fructose-1,6-diphosphate, HPr, phosphocarrier protein	MNVTIYDVAREANVSMATVSRVVNGNPNVKPTTRKKVLEAIDRLGYRPNAVARGLASKKTTTVGVIIPDISNTFYAELARGIEDIATMYKYNIILSNSDQNKEKEFHLLNTMLGKQVDGIVFMGEDITDIHIEEFKKSPVPIVLAASFDEQNETPSVNIDYTQAAYDAMKHFIEQGHKRIGFVSGPFIDKAGSAKKLQGYKKALEEAGISYDENLVIDGDYTYDSGIEAFEKLWSNDEKPTAIFVSSDEMALGVIHAAQDAGLNVPTDVEVLGFDNTRLALMVRPQLSTVVQPMYDIGAVAMRLLTKYMNKEKVEDHTVILPHRIQFRDSTK
Firmicutes	Bacillales	2992	28441	CcpA	ABC2764	Q5WEB2_BACSK	U		Bacillus clausii KSM-K16	66692	Carbohydrate metabolism, Carbon catabolism	Fructose-1,6-diphosphate, HPr, phosphocarrier protein	MNTTIYDVAREAGVSMATVSRVVNGNPNVKPTTRKKVLEAIERLNYRPNAVARGLASKRTTTVGVIIPDISSIFFSELARGIEDIATMYKYNIILCNSDQNKDKEIHLINTLLEKQVDGIVFMGGEITEEHAEQFKRAPVPIVLAATLDDEKSFPSVNIDYTQAAEDAIQFLIEKGHKRIGMLSGSLEDPINGYQKFAGYRQALQKNNIEFDENLIVIGDYTYDSGMEAMDAFLALDEKPTALFASNDEMALGVIHGIQDRGYDVPGDIEVLGFDNTRLATMVRPTLTTVVQPLYDIGAVSMRLLTKLMNKEEVDNYTVTLPHRIESRGSTK
Firmicutes	Bacillales	2992	28442	CcpA	BH3241	Q9K7W7_BACHD	U		Bacillus halodurans C-125	272558	Carbohydrate metabolism, Carbon catabolism	Fructose-1,6-diphosphate, HPr, phosphocarrier protein	MNTTIYDVAREAGVSMATVSRVVNGNPNVKPATRKKVLEAIERLGYRPNAVARGLASKRTTTVGVVIPDISSIFFAELARGIEDIATMYKYNIILCNSDQNKEKEIHLINTLLEKQVDGIVFMGGEITNEHAEEFKRAHVPVVLAATLDAEKEIPSVNIDYKQAAFDAVTYLIEKGHTSIGMVSGSLEDPVNGYQKYAGYREALEERGVAFDESMVVIGDYTYDSGIDAMNVFTKLEKRPTAIFVATDEMALGVIHGAQDHGLNIPDDIEVIGFDNTRLATMVRPTLSTVVQPIYDIGAVSMRLLTKYMNKEEVSEHIVELPHRIEFRQSTRP
Firmicutes	Bacillales	2992	28443	CcpA	BLi03125	Q65G28_BACLD	U		Bacillus licheniformis DSM 13	279010	Carbohydrate metabolism, Carbon catabolism	Fructose-1,6-diphosphate, HPr, phosphocarrier protein	MSNVTIYDVAREANVSMATVSRVVNGNPNVKPTTRKKVLEAIERLGYRPNAVARGLASKKTTTVGVIIPDISSIFYSELARGIEDIATMYKYNIILSNSDQNMDKELHLLNTMLGKQVDGIVFMSGNVTEEHVEEFKRSPVPIVLAASVEEKGETPSVAIDYEQAIYDAATMLIEKGHKRLAFVSGPMAEPVNQAKKLQGFKRALGDKGLQFKEEYVVEGDYTYDSGMEALEALMKLDEKPTAVLSATDEMALGVIHAAQDKGLAVPDDLEVIGFDNTRLSLMVRPQLSTVVQPTYDIGAVAMRLLTKLMNKEEVEEHIVQLPHRIELRQSTK
Firmicutes	Bacillales	2992	28444	CcpA	BPUM_2620	A8FGB1_BACP2	U		Bacillus pumilus SAFR-032	315750	Carbohydrate metabolism, Carbon catabolism	Fructose-1,6-diphosphate, HPr, phosphocarrier protein	MNNVTIYDVAREANVSMATVSRVVNGNPNVKPTTRKKVLEAIDRLGYRPNAVARGLASKKTTTVGVIIPDISSIFYSELARGIEDIATMYKYNIILSNSDQNTDKELHLLNTMLGKQVDGIVFMGGNITDVLVEEFKRSPVPIVLAASVEEQAQTPSVNINYEQAIYDSVQLLVEKGHKRIAFVSGPMSEPINSMRKLAGYKRALEEAGIAFDDVLVAEGDYSYDSGIESLAHLLEQSDKPTAVIAATDEMALGVIHGAQDRGVSIPEDLEVIGFDNTRLSLMVRPQLTTVVQPTYDIGAVAMRLLTKLMNKEQVDDQIVELPHRIEERQSTK
Firmicutes	Bacillales	2992	28445	CcpA	BSU29740	CCPA_BACSU	R	*	Bacillus subtilis subsp. subtilis str. 168	224308	Carbohydrate metabolism, Carbon catabolism	Fructose-1,6-diphosphate, HPr, phosphocarrier protein	MSNITIYDVAREANVSMATVSRVVNGNPNVKPTTRKKVLEAIERLGYRPNAVARGLASKKTTTVGVIIPDISSIFYSELARGIEDIATMYKYNIILSNSDQNMEKELHLLNTMLGKQVDGIVFMGGNITDEHVAEFKRSPVPIVLAASVEEQEETPSVAIDYEQAIYDAVKLLVDKGHTDIAFVSGPMAEPINRSKKLQGYKRALEEANLPFNEQFVAEGDYTYDSGLEALQHLMSLDKKPTAILSATDEMALGIIHAAQDQGLSIPEDLDIIGFDNTRLSLMVRPQLSTVVQPTYDIGAVAMRLLTKLMNKEPVEEHIVELPHRIELRKSTKS
Firmicutes	Bacillales	2992	28446	CcpA	GK2810	Q5KW41_GEOKA	U		Geobacillus kaustophilus HTA426	235909	Carbohydrate metabolism, Carbon catabolism	Fructose-1,6-diphosphate, HPr, phosphocarrier protein	MTVTIYDVAREANVSMATVSRVVNGNPNVKPSTRKKVLEAIERLGYRPNAVARGLASKKTTTVGVIIPDISSIFFAELARGIEDIATMYKYNIILSNSDQNKEKELHLLNTMLAKQVDGLLFMGGTITDEHVAEFQKSSVPIVLAATMGPNEIPSVNIDYEQAAFEAVTYLLEKGNRRIVYVTGPTDDPINQRKLAGYRRALEEHGAPYEEELVIEGDNSYDSGLEAYEKITELAERPTAVFAGTDEMALGIIHSAQDHGGRVPDELEVVGFDNTRLATMVRPRLTTVVQPMYDIGAVAMRLLTKYMNKEPVDHHIVVLPHRLEVRESTK
Firmicutes	Bacillales	2992	28447	CcpA	OB2226	Q8EP89_OCEIH	U		Oceanobacillus iheyensis HTE831	221109	Carbohydrate metabolism, Carbon catabolism	Fructose-1,6-diphosphate, HPr, phosphocarrier protein	MNVTIYDVAREANVSMATVSRVVNGNPNVKPTTRKKVLATIEQLGYRPNAVARGLASKKTTTVGAIIPDISNIFFSELARGIEDIATMYKYNIILSSSDQNKDKELELINTMLEKQVDGILFMGGNISEEHIHQFQTSSVPVVLASTYDPTDTIPSVNIDYELAAYEATKQLIQKGNKQPALVGSKADTSVNNLKTSGYLRALKEANIEVNEDYIYKDEYAYQTGIEAVEYLIGLDDQPNAVFVMYDEIALGVIHGAQDKGLDVPNDLEVFGFDNIRLSTMVRPTLTTIVQPTYDIGAVGMRLLTKYMNKEQVDEKNVVLPHRIEFRNSTIQ
Firmicutes	Bacillales	2992	28448	CcpA	Pjdr2_3800	C6D4W5_PAESJ	U		Paenibacillus sp. JDR-2	324057	Carbohydrate metabolism, Carbon catabolism	Fructose-1,6-diphosphate, HPr, phosphocarrier protein	MTVTIYDVAREAGVSMATVSRVVNNNPNVKPATRKKVYEAIERLGYRPNAVARGLASKKTTTVGVVIPDISNANFAEVARGIEDIANMYHYNIILCNADKKKDKEIRVINTLLEKQVDGLLFMGGAVTEEHMQAFKTANVPIVLCATTDENGQIPSVDINHEEAAYDAVCKLIQEGHKHIAMISGTLQDPANGYARFQGYKRALEDSGIPYDETLVRTGNYRYESGVEAMKYFIDLSERPTAVFAATDEMAIGAIHCIQDSGLKVPDDISVISVDNTRMASMVRPQLTAVAQPMYDIGAVSMRLLTKLMKKEVVEHAKVILPHEIVVRQSVGGLQA
Firmicutes	Clostridia-1	4703	46513	CcpA	CAC3037	REGA_CLOAB	R	*	Clostridium acetobutylicum ATCC 824	272562	Carbohydrate metabolism, Carbon catabolism	Fructose-1,6-diphosphate, HPr, phosphocarrier protein	MAASIKDVAREARVSIATVSRVLNNVDVVNEETKKKVMEAIKKLDYRPNIVARSLKTQRTRTIGIVIPDISSQFYPEIVRGAEDVSNIYNYNVILCNTDLDISKEKDYIRVLKEKMVDGVIYMSNSLAPEILQLLRDLKIPTVLVETRESEDENAFPSVTIDNAKAAYDAVNYLIKKGNNKIAYVGVNPKLKNNARAIIYEGYKKALLDNNIPLNENLIQFGGLKAIDGTDGINVIIKKEKIDAVFCACDEIAMGAINALRENGIDVPKDVDVVGFDNIYTSSIFYPKLTTIEQPTYDMGSVGMRMLIKIINKAEPECLHYVLDYNIIERDSCK
Firmicutes	Clostridia-2	4723	46750	CcpA	CLOBAR_00799	B0A840_9FIRM	U		Clostridium bartlettii DSM 16795	445973	Carbohydrate metabolism, Carbon catabolism	Fructose-1,6-diphosphate, HPr, phosphocarrier protein	MKNNVTIKDVAKLAGVSISTVSRVINDSKPVTDEVKQRVLDVIKETGYVPNPLARSLVTKKSKLLGVIVPEVSDSFVNEIVNGIECVTKMYGYDILLANTYSEKSQELKSIDLLKAKQVEGIVMISWTLDEDHIKSINNSGIPATYISKTAQTFDVYTVSTNNEDATYDMTKYLIDKGHKEIALIMTSEADTILETERRRGYERALTDNNIAINPDIIRYGNTDHDNGYKVMAELLDEGIKPDAVFVTGDEAAIGAINAILDKGYNVPNDISVAGFNNTKLSKMYRPKLTTVGQPLYDMGAVAMRMVIKMINGETLEEKKFVLPYEIIERESVIEKK
Firmicutes	Clostridia-1	4703	46514	CcpA	Cbei_0047	A6LPF7_CLOB8	U		Clostridium beijerincki NCIMB 8052	290402	Carbohydrate metabolism, Carbon catabolism	Fructose-1,6-diphosphate, HPr, phosphocarrier protein	MATSIKDVAKEAGVSIATVSRVLNDIDVVNEDTKKKVLDAIKKLGYRPNIVARSLKTQRTKTIGILLPDISNQFYPEIVRGAEDVSNIYDYNIILCNSDLDIEKEKEYLRVLREKMVDGVIYMSSSLNEEILELINELDIKTVLVETKDKEGVLPSVTIDNVKASYDSTKLLIEKGIKEIAFIGAEKESKNAWGDRYVGYENAMKESGIEIDPELVHLSSMKVKSGYEGIQKFIKQNKKFRGVVCASDDIAMGAINALRDNNLDIPKDVSVIGFNDNFAASIFYPKITTISQPTYDMGSVAMRMLIKLLNKKELDEPHYVLEHQLVERESTV
Firmicutes	Clostridia-1	4703	46515	CcpA	CBO0100	A5HXZ7_CLOBH	U		Clostridium botulinum A str. ATCC 3502	413999	Carbohydrate metabolism, Carbon catabolism	Fructose-1,6-diphosphate, HPr, phosphocarrier protein	MAVSIKDVAKEAQVSIATVSRVLNNIDVVNEDTKKKVLDAIDKLGYRPNIVARSLKTQKSKTIGIIIPDISNQFYPEIVRGAEDVANIYDYNIMLCNTDLDPEKEMEYLRVLREKMADGVLYMSNSLEKNILELIKSLQLPVVLVETKDSEEKLPSVTIDNLKASLDATEYLINKGNKNIAYIGLHEDMANAAVLRYEGYKLALRKNNIKENKDLVYLGGMKVRDGYEGINKILEKEKIDAIFCADDEIAMGAINALRDKNIKVPDEIDVMGFNNIYSSNVFYPKLTTIGQPMYDMGSVGMRMLIKIINKEELENDNYVLQHKIVERDSCKK
Firmicutes	Clostridia-1	4703	46516	CcpA	CBY_2264	B1R1Y1_CLOBU	U		Clostridium butyricum 5521	447214	Carbohydrate metabolism, Carbon catabolism	Fructose-1,6-diphosphate, HPr, phosphocarrier protein	MATSIKDVAREAGVSIATVSRVLNDIDVVNEDTKKKVLDAIKKLGYRPNIVARSLKTQRTKTIGILVPDISNQLYPEIVRGAEDVSNIYDYNVILCNSDLDIDKEKEYLRVLKEKMVDGVIYMSSSLQDEILELINELDLKTVLVETKDKNGLLPSVTIDNVKGSYDSTKFLIDKGIKDIAFIGTNKDTMNAWGDRYVGYENAMKEAGLTIDSDLVYLSSIKVKTGYEGIVNIIKTGKKFSAVVCASDDIAMGAINALRDNGIEVPKDVSVIGFNDNFAASIFYPKITTISQPTYDMGSVAMRMLIKLLNQQALDKAHFILEHELIERESTI
Firmicutes	Clostridia-2	4723	46749	CcpA	CD1064	Q18AR8_CLOD6	U	*	Clostridium difficile 630	272563	Carbohydrate metabolism, Carbon catabolism	Fructose-1,6-diphosphate, HPr, phosphocarrier protein	MKGNITIKDVAKQAGVSISTVSRVINDSKPVTDEVKQKVLEVIKETGYIPNPLARSLVTKKSQLIGVIVPEVSDSFVNEVLNGIEEVAKMYDYDILLANTYSDKEQELKSINLLRAKQVEGIVMISWIVEQEHINYIQNCGIPATYISKTARNYDIYTVSTSNEEATFDMTEHLIKKGHEKIAFIMTSKDDTVLEMERLAGYEKALSNNNIELDKSLIKYGGTDYESGYNSMKELLDDGIIPHAAFVTGDEAAIGAINAICDAGYKVPEDISVAGFNDVKIARMYRPKLTTVYQPLYDMGAVAIRMVIKLINKELIENKKIELPYRIVDRESVTERKK
Firmicutes	Clostridia-2	4723	46748	CcpA	CLOHIR_01937	B6G1D1_9FIRM	U		Clostridium hiranonis DSM 13275	500633	Carbohydrate metabolism, Carbon catabolism	Fructose-1,6-diphosphate, HPr, phosphocarrier protein	MKNTVTIKDVAKKAGVSISTVSRVINNSKPVTDEIKKKVLDVIEETGYVPNPLARSLVTKKSQLIGVVVPEVSDSFVNEILNGIEEIARMYNYDILLSNTYSDKNEEMRSINLLRAKQIEGMVMISWDLAKEHIDYIENCGIPTTYISKTARDYDVPTVSVNNEKATYDMTNHLISQGHKKIAFVMTSAGDTRLEKERLDGYKSALAENGIEFNEELVRYGGVDYNSGYESTKDILEKGIVPDAVFVTGDEAAVGAMNAVFDKGFSVPNDISVAGFNDVKIARMYRPKLTTVHQPLYDMGAVAIRMVIKMINGEEIEEKKVELPHRIEERESVIKK
Firmicutes	Clostridia-1	4703	46517	CcpA	CKL_3751	A5N3P0_CLOK5	U		Clostridium kluyveri DSM 555	431943	Carbohydrate metabolism, Carbon catabolism	Fructose-1,6-diphosphate, HPr, phosphocarrier protein	MATSIKDVAKEAGVSIATVSRVLNDVDVVNEETKKKVLAAIKKLGYRPNIVARSLKTQKTRTIGIIIPDISNQFYPEIVRGAEDVANIYDYNIMLCNTDLDMEKETEYLKVLKEKMSDGVLYMSNSLEEDMLNLIKQLQIPMVLVETTNDKEDIPSVTIDNEKAAYDGVTYLINKGNRKIAYIGASEDMANASAVRYKGYKKALEENNLQVDKNRTYFSNLKAKDGYEGINKILDRVDVDAIFCSSDEIAMGAINALRDRGIKVPEDVDVMGFDNIYSASIFYPKLTTVAQPIYDMGSVGMRMLIKLINNQKMDNTNYVLPHQLIERDSCKK
Firmicutes	Clostridia-1	4703	46518	CcpA	NT01CX_0643	A0Q3A7_CLONN	U		Clostridium novyi NT	386415	Carbohydrate metabolism, Carbon catabolism	Fructose-1,6-diphosphate, HPr, phosphocarrier protein	MATSIKDVAREANVSIATVSRVLNNVDVVNEDTKKKVLEAIKKLDYRPNIVARSLKTQKTRTIGIIVPDISNPIYPEVVRGAEDVSNIYNYNIILCNTDLEPDKELEYLRVLGEKMVDGVIYISNSLEERTIKTIKDSNTPLVLIETNGRETNFPSVIIDNKGAAIDAVNYLYKKGNRKIAYIGISDDVINASAIRHEGYIAGLEQNNLSYDKNITYFCNYSLKAEDGYKAMNNILEKSTDIDAVFCVNDEIAMGAINALRDKNIRVPEDVDVMGFNDTHGAEYFYPRLTTIAQPLYDMGSVATRMLIKKINNEPLDKELFVLPYELIERDSCK
Firmicutes	Clostridia-1	4703	46519	CcpA	CPF_2863	Q0TMB3_CLOP1	U		Clostridium perfringens ATCC 13124	195103	Carbohydrate metabolism, Carbon catabolism	Fructose-1,6-diphosphate, HPr, phosphocarrier protein	MAASIKDVAREAGVSIATVSRVLNDIDVVNEETKKKVLEAIKKLGYRPNIVARSLKTHRTRTVGILVPDISNQIYPEIVRGAEDVANIYKYNVMLCNSDLDLEKEKEYLRVLKEKMVDGVLYMSSSLGEETLNLINELDLKTVLVENDEQNGKFPSVTIDNEKATYEATNHLIDKGMKNIAFIGVEGDLNNAWGKRYKGYQAALKDAGIEMKEELTYFKNLKVKTGYDAILAMLENGQKIEGIICASDEIAMGAINALRDKGIKVPEEVSVIGFNDIDLAHVFYPKLTTVSQPMYDMGSIAMRMLIKIINNKPLDQDHFVLDHDLIERDSCK
Firmicutes	Clostridia-1	4703	46520	CcpA	CTC00263	Q899C2_CLOTE	U		Clostridium tetani E88	212717	Carbohydrate metabolism, Carbon catabolism	Fructose-1,6-diphosphate, HPr, phosphocarrier protein	MPASIKDVAKEAGVSIATVSRVLNDIDVVNEDTKKKVLDAIKKLGYRPNIVARSLKTQRTSTIGIIVPDISNQFYPEIVRGAEDVANIYEYNIMLCNTDLDTEKEKEYLRVLKEKMTDGVLYMSNSLENETVELIKELRIPTVLVETTDENKEFPSVSIDNKKAAYEAVKYLINKGNKKIAYIGPKDEKNNAVALRYKGYKKCLEENNIEIKECLIYRSGLKAGDGYEAMEKILKEESIDSVFCANDEIAMGAINALRDKGINVPEDVDVIGFNNIYSASIFYPKLTTISQPMYDMGSVGMRMLIKTINKEPLEKEHYVLNYNLIERDSCKK
Firmicutes	Lactobacillaceae	3511	34342	CcpA	LBA0431	Q5FLV2_LACAC	U		Lactobacillus acidophilus NCFM	272621	Carbohydrate metabolism, Carbon catabolism	Fructose-1,6-diphosphate, HPr, phosphocarrier protein	MHKQEVTIYDVAREAKVSMATVSRVVNGNNNVRKETRDRVLEVIKRLHYQPNAVAQGLASKRTTTVGLIVPDLTNLYFAELSKGIDDIALLYKYNIIITSIENRLMKEDQVIQSLLNKQVDGVIYMSNRLPDKAAEAFNRTDTPVVLAGTKDNREEFASVTIDYKKADTEALNLMMHDGKKNLAIVVGDEDAVVNGENRIPAYQEFIKENNLGEPHIYTGIRDYSDGYNLYPQLVKDGIDGVIVTRDISSVGIMNSAMDAGKKIPEDLEIVTASATQLASVVRPALTTIKQPLYDMGAVAMRMLTKLMNNEEVDETHIELPYELVKKQSTANR
Firmicutes	Lactobacillaceae	3511	34343	CcpA	LVIS_1203	Q03R63_LACBA	U		Lactobacillus brevis ATCC 367	387344	Carbohydrate metabolism, Carbon catabolism	Fructose-1,6-diphosphate, HPr, phosphocarrier protein	MEKQTVTIYDVAREAAVSMATVSRVVNGNPNVKPATRKKVLEVIDRLDYRPNAVARGLASKKTTTVGVIIPDVTNAYFSSLARGIDDIAMMYKYNIILTNSDENGGKEVQVLNTLMAKQVDGIIFMGNQVTDELREEFKRSKAPVVLAGSVDAEKAQPSVNIDYVAAVAEAVKNLIDHGNKKVAFVSGPMDQAINHDYRLKGYKKALKDAGITYDEKLVFETDYTYKAGQSLEPALTAAGATAAFVGDDELAAGVMNGLTDAGVDVPGEFEVITSNDTKLTELVRPKMSSITQPLYDIGAVAMRLLTKLMNNETVEENTVILPYGLMKRSSTK
Firmicutes	Lactobacillaceae	3511	34344	CcpA	LSEI_0809	Q03AX7_LACC3	U		Lactobacillus casei ATCC 334	321967	Carbohydrate metabolism, Carbon catabolism	Fructose-1,6-diphosphate, HPr, phosphocarrier protein	MEKQTITIYDVAREANVSMATVSRVVNGNPNVKPATRKKVLEVIERLDYRPNAVARGLASKKTTTVGVIIPDVTNMFFSSLARGIDDVATMYKYNIILANSDENNQKEVTVLNTLLAKQVDGLIFMGHELTDSIRAEFSRSKTPVVLAGSIDPDEQVGSVNIDYVAAVEEATRQLLESGNKRVALATGSLTHPINGQFRLKGYKQALEKAGVAYDESLIFENEPSYQAGLALFDKLQKVGATAVIAGDDELAVGLLDGAIDKGVKVPDDFEIITSNNTKLTEMTRPQLTSIDQPLYDIGAVAMRLLTKMMNKEEIEEKTVMLGFDILKRGSTK
Firmicutes	Lactobacillaceae	3511	34345	CcpA	LBUL_1473	Q049A6_LACDB	U		Lactobacillus delbrueckii subsp. bulgaricus ATCC BAA-365	321956	Carbohydrate metabolism, Carbon catabolism	Fructose-1,6-diphosphate, HPr, phosphocarrier protein	MNKQDVTIYDVAREAKVSMATVSRVVNGNNNVRKETRDRVMEVIKRLHYQPNAVAQGLASKRTTTVGLIVPDLTNLYFAELSKGIDDIAVLYKYNIIISSVENRLMKEDAVIQGLLNKQVDGVIYMSNKLSEEAAEAFKRTDTPVVLAGTVSDNLEFPSANIDYKKADTEALNLLLNDGKKKLALIVGDKEAPINRNHRIPAFEKFVADNELEGCVIFDNIKDYSDGYNLYPELAKKGINGAIITKDVSSVGLLNSALDRGAKVPEDFEIVTASATQIASVVRPALTTIKQPLYDLGAVAMRMLTKLMNDEGLEDKHIVLPYELIKKQSTLNK
Firmicutes	Lactobacillaceae	3511	34346	CcpA	LAF_0539	B2GB43_LACF3	U		Lactobacillus fermentum IFO 3956	334390	Carbohydrate metabolism, Carbon catabolism	Fructose-1,6-diphosphate, HPr, phosphocarrier protein	MQKQSVTIYTVAREARVSMATVSRVVNGNPNVKPETRKKVLDVIKELNYRPNAVARGLASKKTTTVGVVIPDVTNDYFSKLALGIDDIASMYKYNMILTNSDADDHKALQVVRSMMAKQVDGIIFMGHDISEELRQEFSSSTIPVVVAGSAINDEDLPTVRINYQAATKEAVQYLLNHGNDKVALVIGSKASTINAQMRIPGYEAALKEAGQSLDEALIFEAHDSYREGYDLTEKVLESGAKAAFVSDDGIAAGLLNGLTDHGSKVPADFELITANDTKLTEITRPKMTSVTQPLYDIGAVSMRLLTKLMGNNQATDGEDGDDEQNVILPHGFEERQTTR
Firmicutes	Lactobacillaceae	3511	34347	CcpA	lhv_0457	A8YTS4_LACH4	U		Lactobacillus helveticus DPC 4571	405566	Carbohydrate metabolism, Carbon catabolism	Fructose-1,6-diphosphate, HPr, phosphocarrier protein	MHKQEVTIYDVAREAKVSMATVSRVVNGNNNVSKETRDRVLEVIKRLHYQPNAVAQGLASKRTTTVGLIVPDLTNLYFAELSKGIDDIALLYKYNIIITSIENRLMKEDQVIQSLLNKQVDGVIYMSNRLPNEAAEAFKRTNTPVVLAGTRNNRDEFASVTIDYKKADTEALNLLMHDGKKNLALVVGDEDAVVNGENRIPAYNEFIKENNLGEPHVYTGVKDYSDGYNLYPQLVKDGIDGIIVTRDISSVGILNSAIDAGKKIPEDLEIVTASATQLASVVRPALTTIKQPLYDMGAVAMRMLTKLMNNEEVDETHIELPYELVKKQSTLNQ
Firmicutes	Lactobacillaceae	3511	34348	CcpA	LJ0491	Q74KT6_LACJO	U		Lactobacillus johnsonii NCC 533	257314	Carbohydrate metabolism, Carbon catabolism	Fructose-1,6-diphosphate, HPr, phosphocarrier protein	MQKQEVTIYDVAREAKVSMATVSRVVNGNNNVRKETREKVLAVIDRLHYQPNAVAQGLASKRTTTVGLIVPDLTNMHFAELSKGIDDIATMYKYNILLSSVGNTLLNEDQVIQNLLNKQVDGVIYMSNLMSESAQEIFKRTNTPVVLAGTADANHDFPSVTIDYKAAEKEALGLLLKNGKKNLALVVGDGKAYVNKDNRFVAYKDFMEEHNLDNVHIYEDARTYEDGYELFEQIKADKVDGIIATRAVTAAGITNAAVDAGVSIPDDLEIISAASTNVAKIVRPQLTTVQQPLYDIGAVAMRMLTKLMSDEELDEAHVILPYTLKQSRSTK
Firmicutes	Lactobacillaceae	3511	34349	CcpA	lp_2256	F9UQH6_LACPL	U	*	Lactobacillus plantarum WCFS1	220668	Carbohydrate metabolism, Carbon catabolism	Fructose-1,6-diphosphate, HPr, phosphocarrier protein	MEKQTVTIYDVAREAAVSMATVSRVVNGNPNVKPATRKKVLAVIERLDYRPNAVARGLASKRSTTVGVIIPDVTNIYFAALARGIDDIAMMYKYNIILTNSDDAGEQEVNVLNTLMAKQVDGVIFMGNHIDDKLRAEFKRAKAPVVLAGTVDPNNETPSVNIDYAAAVEEVVTNLIARGHKKIALALGSLSQSINAEYRLTGYKRALTKAKIPFDDALVYEAGYSYDAGRKLQPVIADSGATAVFVGDDEMAAGLINASMESGINVPDDLEVVTSNDTIITQITRPAITSITQPLYDIGAVAMRMLTKLMNDKELDEKTVTLPYGIVRRGSTKSAD
Firmicutes	Lactobacillaceae	3511	34350	CcpA	LAR_0536	B2G6H0_LACRJ	U		Lactobacillus reuteri JCM 1112	557433	Carbohydrate metabolism, Carbon catabolism	Fructose-1,6-diphosphate, HPr, phosphocarrier protein	MEKQSVTIYTVAREARVSMATVSRVVNGNPNVKPETRQKVLDVIKQLNYRPNAVARGLASKKTTTVGVVIPNITDPYFAELALGIDDVASMYKYNIILTNSDSDDEKILKVVRSLLAKQVDGLIFMGHDVSDDLRNEFESTNTPVVVAGSVVNDDTLPSVRINYQAAAKEATEFLLKHGDQQVAYITGSLRYSINGKDRLDGYKEALANNNVAFNDSLVIETDGSYQAGYAKAQEVIEKGLKAAYVTDDSLAAGLLNGLTDAGISVPADFELISSNDTNYTKVVRPTITSITQPLYDLGAISMRLLTKLMDGDDSNDDEKNVILDHGFVERQSTRK
Firmicutes	Lactobacillaceae	3511	34351	CcpA	LGG_00793	C7TAP5_LACRG	U		Lactobacillus rhamnosus GG	568703	Carbohydrate metabolism, Carbon catabolism	Fructose-1,6-diphosphate, HPr, phosphocarrier protein	MEKQTITIYDVAREANVSMATVSRVVNGNPNVKPATRKKVLEVIERLDYRPNAVARGLASKKTTTVGVIIPDVTNMFFSSLARGIDDVATMYKYNIILANSDENNQKEVSVLNTLLAKQVDGLIFMGHELTDAIRAEFSRSKTPVVLAGSIDPDEQVGSVNIDYVAAVEEATRQLIESGNKRVALATGSLTHPINGQFRLKGYKQALEKAGVAYDESLIFENEPSYQAGLALFGKLQKVGATAVIAGDDELAVGILDGALDKGVKVPEDFEIISSNNTKLTEMTRPQLTSIDQPLYDIGAVAMRLLTKMMNKEEIEEKTVMLGFDILKRGSTK
Firmicutes	Lactobacillaceae	3511	34352	CcpA	LSA0415	Q38YL1_LACSS	U		Lactobacillus sakei subsp. sakei 23K	314315	Carbohydrate metabolism, Carbon catabolism	Fructose-1,6-diphosphate, HPr, phosphocarrier protein	MEKQTITIYDVAREADVSMATVSRVVNGNPNVKPATRKKVLEVIDRLDYRPNAVARGLASKKTTTVGVIIPDVSDIYFASLARGIDDVATMYKYNIILANSDENNQKEVQVLNTLLAKQVDGLIYMGHSISDAIRAEFARSKTPIVLAGSIDPDEQVGSVNIDYVAAVKDATLKLIKNGNEKVAFICGNLEFPINSKYRLRGYKDALNEAGIPYDESLIFETEYSYSAGEALFGKVQAIGATAAVVSDDELAVGVLNAAVDAGVNIPTDFEIVTSNNTKLTEMVRPKMTSISQPLYDMGAVGMRLLTKMMNKEEIDDKTILLPYSIVDRQSTK
Firmicutes	Lactobacillaceae	3511	34353	CcpA	LSL_0420	Q1WUV5_LACS1	U		Lactobacillus salivarius subsp. salivarius UCC118	362948	Carbohydrate metabolism, Carbon catabolism	Fructose-1,6-diphosphate, HPr, phosphocarrier protein	MEKQTITIYDVAREADVSMATVSRVVNGNPNVKPATRKKVLEVIDRLDYRPNAVARGLASKKTTTVGVIIPDVTNVYFSSLARGIDDVASMYKYNIILANSDANEQKELQVLNTLLAKQVDGIIFMGNKITDELRKQIDKTKTPVVLAGSLDDKEEFESVHINYVDAVEEAVSDLINHGNDKIAFISGPLSEPINSKYRLQGYKNALSKNGIACDEELVFETDYSYHSGEILWPALQSVGATAAYVGDDELAVGVLNGAQDAGAKVPTDFEIVTSNNSKLTELVRPKLSSITQPLYDIGAVSMRFLTKMMNKEETSADEKTIELPYGYIKRGSTK
Firmicutes	Lactobacillaceae	3511	34354	CcpA	LEUM_0544	Q03YR4_LEUMM	U		Leuconostoc mesenteroides subsp. mesenteroides ATCC 8293	203120	Carbohydrate metabolism, Carbon catabolism	Fructose-1,6-diphosphate, HPr, phosphocarrier protein	MQKKQTATIYDVASRVGVSLATVSRVVNGNSNVRESTKRKVLDAIEELGYHPNAVARGLASKKTTTIGVVMPDVTDMYYSELARGIDDVANMYHYDVLLTNTDEDPVRETMAINNLASKQVDGIIFMGNELDREVLKTISSVDAPVVLAGSIDAEKVLPSVNIDYIAATKEAVEMVVKNGHERVALVTGPMEYAINKQHRLVGYQAGLEAAGQEFDEDLLFASHQDYSAGYQIADKIFATNATAAIVHDDEVALGIMNYMRDQGKSVPEDFEIITSNDTKFAIVTRPALTSIGQPKYDIGAVAMRMLTKLMNNEVVDNMQVTLPHTFEKRGTTIN
Firmicutes	Lactobacillaceae	3511	34355	CcpA	OEOE_0684	Q04G01_OENOB	U		Oenococcus oeni PSU-1	203123	Carbohydrate metabolism, Carbon catabolism	Fructose-1,6-diphosphate, HPr, phosphocarrier protein	MTDNKQPTIYDVSERVGVSLATVSRVVNNNGKVKSETRQKVLKAIKELNYRPNAMAKGLASSKTTMIGMVMPDLTDLYYAELAQGIDAVAKIYKYSVTLAVSDENPEAEKAALNTLIDKHVDGMIYMGNKTSGEMLKLLEDSPFPVVFAGSVDPQGKLPSVNINYVKAFSQAGEMLKKSDLDESEVALVDNPGEGSLSSLRQQGFLNAVSGGKIYESDDDYQAGYNLAQHLYEDGIKAVIVGEDEPALGILNYMQDKGIKVPDQFQIISSNDTKLVKMARPAISSVTQPKFDIGAVAMRLLTKLMSGQEIDDSKVVLPHEFVMRDTTK
Firmicutes	Lactobacillaceae	3511	34356	CcpA	PEPE_1250	Q03ET1_PEDPA	U		Pediococcus pentosaceus ATCC 25745	278197	Carbohydrate metabolism, Carbon catabolism	Fructose-1,6-diphosphate, HPr, phosphocarrier protein	MAKQTITIYDVAREAGVSMATVSRVVNGNPNVKPVTRKKVNEVIERLDYHPNAVARGLASKRSTTIGVILPDITQMFFASLARGIDDIASMYKYNIILENSDEDVDKKVEVLENLQAKQVDGIIYMGNAVDDRLREAFKAARTPVVFAGSVDDKNTLPSVSIDNKAAVYEAVNKLIDNKNKKIAFISGPLSEPVNGKFRLEGYRLALSEAKVDYDENLVFETSNTYEDGVKLASEIASTTGVTAAFVANDSLAVGLLNGLQDLGVKVPEDFEIISSNNTSLTKMVRPQISSIGHPMYDTGAVAMRLLTKLMNKEEVEERNITLPFDMVFRQSTK
Firmicutes	Staphylococcaceae	662	6558	CcpA	MCCL_1413	B9E7F2_MACCJ	U		Macrococcus caseolyticus JCSC5402	458233	Carbohydrate metabolism, Carbon catabolism	Fructose-1,6-diphosphate, HPr, phosphocarrier protein	MTVTIYDVAREAKVSMATVSRVVNGNPNVKPATRDRVNEVIERLNYRPNAVARGLASKKTTTVGVIIPDISNMYYSELARGLEDIAKMYKYQTIISNSDNDAVKEQEIFNNLLSKQVDGIIFLGGTLSEKTADMIRKSSVPVVLSGTLDQDESLPSVNIDYVEASREITHKFIESGVQRFAFVGGGYSEKAQIDVLSGIKSLLEEHAMELPESAQYIGTEQYLDGEKAYRVIKETNPEVVLCISDEQAIGIVHAAQDDGRVIPDDLQVISFNNTRLVKMVRPKLSSVMQPLYDIGAVGMRLLTKYMNDEPIENQKVVLPYRIEYRGTTK
Firmicutes	Staphylococcaceae	662	6552	CcpA	SA1557	CCPA_STAAN	R	*	Staphylococcus aureus subsp. aureus N315	158879	Carbohydrate metabolism, Carbon catabolism	Fructose-1,6-diphosphate, HPr, phosphocarrier protein	MATVSRVVNGNQNVKAETKNKVNEVIKRLNYRPNAVARGLASKKTTTVGVIIPDISNIYYSQLARGLEDIATMYKYHSIISNSDNDPEKEKEIFNNLLSKQVDGIIFLGGTITEEMKELINQSSVPVVVSGTNGKDAHIASVNIDFTEAAKEITGELIEKGAKSFALVGGEHSKKAQEDVLEGLTEVLNKNGLQLGDTLNCSGAESYKEGVKAFAKMKGNLPDAILCISDEEAIGIMHSAMDAGIKVPEELQIISFNNTRLVEMVRPQLSSVIQPLYDIGAVGMRLLTKYMNDEKIEEPNVVLPHRIEYRGTTK
Firmicutes	Staphylococcaceae	662	6553	CcpA	STACA0001_0629	B9CSX4_STACP	U		Staphylococcus capitis SK14	553212	Carbohydrate metabolism, Carbon catabolism	Fructose-1,6-diphosphate, HPr, phosphocarrier protein	MTVTIYDVAREARVSMATVSRVVNGNQNVKPETRNKVNEVIKKLNYRPNAVARGLASKRTTTVGVIIPDISNVYYSQLARGLEDIATMYKYHSIISNSDNDPEKEKEIFNNLLSKQVDGIIFLGGTISEEIKDLINQSSVPVVVSGTNGKDDHIASVNIDFKQAAEEATQHMIEKGAKKFALVGGDYSKKAQDDVLQGLTKVLNQHHLELDEALHFSGKESYKEGIKAFEKLQNNMPDAILSISDEQAIGILHSALDAGVNVPEDLQILSFNNTRLVEMVRPQLSSVIQPLYDIGAVGMRLLTKYMNEEEIAEPNVILPHRIEYRGTTN
Firmicutes	Staphylococcaceae	662	6555	CcpA	Sca_1342	B9DN68_STACT	U		Staphylococcus carnosus subsp. carnosus TM300	396513	Carbohydrate metabolism, Carbon catabolism	Fructose-1,6-diphosphate, HPr, phosphocarrier protein	MTVTIYDVAREARVSMATVSRVVNGNQNVKPETRDKVNEVIKKLNYRPNAVARGLASKKTTTVGVIIPDISNVYYSQLARGLEDIATMYKYHSIISNSDNDPEKAKEIFNNLLSKQVDGIIFLGGTLDDELEKLIETSSVPVVVSGTSDDDHSIASVNIDYKQAAKEVTEHLIETGAKQFAFVGGNNSEKAEADVLEGLQEVLQQHQLSLDDNLKFTGKETYKDGLNAFETISQFKPDAILSISDEQAIGIVHAALDADVKIPENLQVVSFNNTRLVEMVRPQLSSVIQPLYDIGAVGMRLLTKYMNNEDITESNVILPYRIEYRGTTR
Firmicutes	Staphylococcaceae	662	6554	CcpA	SE1409	CCPA_STAES	R		Staphylococcus epidermidis ATCC 12228	176280	Carbohydrate metabolism, Carbon catabolism	Fructose-1,6-diphosphate, HPr, phosphocarrier protein	MATVSRVVNGNQNVKPETRNKVNEVIKRLNYRPNAVARGLASKRTTTVGVIIPDISNVYYSQLARGLEDIATMYKYHSIISNSDNDPEKEKEIFNNLLSKQVDGIIFLGGTISEEIKSLINQSSVPVVVSGTDGKDDHIASVNIDFKQAAEEATQYLIEKGAKTFSLIGGEYSIKAQDDVLEGLKNVLSQHQLKLDDTLHLTGNESYKSGIKTFEQLQSNLPDAVLCISDEQAIGILHSAQDAGVKVPEDLQIISFNNTRLVEMVRPQLSSVIQPLYDIGAVGMRLLTKYMNDEEIENPNVILPHRIEYRGTTQ
Firmicutes	Staphylococcaceae	662	6556	CcpA	SH1186	Q4L780_STAHJ	U		Staphylococcus haemolyticus JCSC1435	279808	Carbohydrate metabolism, Carbon catabolism	Fructose-1,6-diphosphate, HPr, phosphocarrier protein	MTVTIYDVAREARVSMATVSRVVNGNQNVKPETRKKVNEVIKRLNYRPNAVARGLASKRTTTVGVIIPDISNIYYSQLARGIEDIATMYKYHSIISNSDNDSEKEKEIFNNLLSKQVDGIIFLGGTISDEIKDLINQSSVPVVVSGTNGKDDNIASVNIDFKTAAMEITEQLIQSGAKEFALVSGDYSKKAQEDVFNGLKEVVDRHQLKLNETVQFSGSESYKDGIKVFEDLKGNLPDAILSISDEQAIGIMHSALDAGIRVPEDLQIVSFNNTRLVEMVRPKLSSVIQPLYDIGAVGMRLLTKYMNEEEIEEPNVILPHRIEYRGTTKD
Firmicutes	Staphylococcaceae	662	6557	CcpA	SSP1027	Q49YG7_STAS1	U		Staphylococcus saprophyticus subsp. saprophyticus ATCC 15305	342451	Carbohydrate metabolism, Carbon catabolism	Fructose-1,6-diphosphate, HPr, phosphocarrier protein	MTVTIYDVAREARVSMATVSRVVNGNQNVKPETRDKVNDVIKKLNYRPNAVARGLASKRTTTVGVIIPDISNVYYSQLARGLEDIATMYKYHSIISNSDNDPNKEKEIFNNLLSKQVDGIIFLGGTISEEIKELINKSSVPVVVSGTNGKDEGISSVNIDFKTAAKEITTELIEKGAKTFAFVGGDYSKKAQEDVLTGLKEVLDSNHLELKNELIFNGNETYKDGLRAFESLKSGKPDAILSISDEQAIGLVHAAQDEGVNVPEDVQIISFNNTRLVEMVRPQLSSVIQPLYDIGAVGMRLLTKYMNEEEIDEPNVILPHRIEYRGTTK
Firmicutes	Streptococcaceae	3584	35137	CcpA	LACR_1812	Q02XL8_LACLS	U		Lactococcus lactis subsp. cremoris SK11	272622	Carbohydrate metabolism, Carbon catabolism	Fructose-1,6-diphosphate, HPr, phosphocarrier protein	MVESTTIYDVARVAGVSMATVSRVVNGNANVKEKTRQKVLEAIAELDYRPNAVARGLASKRTTTVGVILPTITSTYFAAITRGVDDIASMYKYNMILANSDNDVEKEEKVLETFLSKQVDGIVYMGSSLDEKIRTSLKNSRTPVVLVGTIDGDKEIPSVNIDYHLADYQSTTKLIENGNKKIAYIMGSLKDVENTERMVGYQEALLEANIEFDENLVFEGNYSYEQGKSLAERLLERGATSAVVSHDTVAVGLLSAMMDKGVKVPEEFEIISGANSPITQYTYPTLTSVNQPLYDLGAVAMRLLTKLMLKEDVEQNQLVLDHEIISRRSTK
Firmicutes	Streptococcaceae	3584	35138	CcpA	L0143	Q9CF33_LACLA	U		Lactococcus lactis subsp. lactis Il1403	272623	Carbohydrate metabolism, Carbon catabolism	Fructose-1,6-diphosphate, HPr, phosphocarrier protein	MVESTTTIYDVARVAGVSMATVSRVVNGNANVKEKTRQKVLEAIAELDYRPNAVARGLASKRTTTVGVILPTITSTYFAAITRGVDDIDSMYKYNMILANSDNDVEKEEKVLETFLSKQVDGIVYMGSSLDEKIRTSLKNSRTPVVLVGTIDGDKEIPSVNIDYHLAAYQSTKKLIDSGNKKIAYIMGSLKDVENTERMVGYQEALLEANIEFDENLVFEGNYSYEQGKALAERLLERGATSAVVSHDTVAVGLLSAMMDKGVKVPEDFEIISGANSPITQYTYPTLTSVNQPLYDLGAVAMRLLTKLMLKEDVEQNQLVLDHEIFSRRSTK
Firmicutes	Streptococcaceae	3584	35139	CcpA	SAG0707	Q8E0M3_STRA5	U		Streptococcus agalactiae 2603V/R	208435	Carbohydrate metabolism, Carbon catabolism	Fructose-1,6-diphosphate, HPr, phosphocarrier protein	MNTDDTITIYDVAREAGVSMATVSRVVNGNKNVKENTRKKVLEVIDRLDYRPNAVARGLASKKTTTVGVVIPNIANSYFSILARGIDDIAAMYKYNIVLASSDEDDDKEVNVVNTLFAKQVDGIIFMGHHLTEKIRAEFSRSRTPIVLAGTVDLEHQLPSVNIDYKAAAVDVIDILAGNHKDIAFVSGPLIDDINGKVRLAGYKEGLKKNGLNFKEGLVFEANYRYAEGFALAQRVINAGATAAYVAEDELAAGLLNGLFEAGKRVPEDFEIITSNDSPIAQYTRPNLTSISQPVYDLGAVSMRMLTKIMHKEELEEKEIVLNHGIVKRGTTNN
Firmicutes	Streptococcaceae	3584	35140	CcpA	SDEG_0545	C5WF82_STRDG	U		Streptococcus dysgalactiae subsp. equisimilis GGS_124	486410	Carbohydrate metabolism, Carbon catabolism	Fructose-1,6-diphosphate, HPr, phosphocarrier protein	MNTDDTITIYDVAREAGVSMATVSRVVNGNKNVKENTRKKVLEVIDRLDYRPNAVARGLASKKTTTVGVVIPNIANSYFSILAKGIDDIAAMYKYNIVLASSDEDDDKEVNVVNTLFAKQVDGIIFMGHHLTEKIRAEFSRSRTPIVLAGTVDLDHQLPSVNIDYKAAVSNVVDILAENHQSIAFVSGPLIDDINGKVRLAGYKEGLKHNKLDFKEGLVFEANYSYKEGFELAQRVINSGATAAYVAEDELAAGLLNGLFEAGKRVPEDFEIITSNDSPVVQYTRPNLSSISQPVYDLGAVSMRMLTKIMNKEELEEKEILLNHGIKKRGTTK
Firmicutes	Streptococcaceae	3584	35141	CcpA	Sez_1410	B4U429_STREM	U		Streptococcus equi subsp. zooepidemicus MGCS10565	552526	Carbohydrate metabolism, Carbon catabolism	Fructose-1,6-diphosphate, HPr, phosphocarrier protein	MNTDDTITIYDVAREAGVSMATVSRVVNGNKNVKENTRKKVLEVIDRLDYRPNAVARGLASKKTTTVGVVIPNIANSYFSILAKGIDDIAAMYKYNIVLASSDEDDDKEVNVVNTLFAKQVDGIIFMGHHLTDKIRAEFSRSRTPIVLAGTVDLDHQLPSVNIDYKAAVADVVDILAKDHQSIAFVSGPLIDDINGKVRLAGYKDGLKKNKLDFKEGLVFEANYSYKEGFELAQRVINSGATAAYVAEDELAAGLLNGLFEAGKRVPEDFEIITSNDSPVVQYTRPNLSSISQPVYDLGAVSMRMLTKIMNKEELEEKEILLNHGIKKRGTTK
Firmicutes	Streptococcaceae	3584	35142	CcpA	GALLO_1582	D3HEW0_STRG3	U		Streptococcus gallolyticus UCN34	637909	Carbohydrate metabolism, Carbon catabolism	Fructose-1,6-diphosphate, HPr, phosphocarrier protein	MNTDDTITIYDVAREAGVSMATVSRVVNGNKNVKENTRKKVLEVIDRLDYRPNAVARGLASKKTTTVGVVIPNIANSYFSILAKGIDDIAAMYKYNIVLASSDEDDDKEVNVVNTLFAKQVDGIIFMGHHLTEKIRAEFSRSRTPVVLAGTVDLEHQLPSVNIDYKAAVADVVDILAKNNKEIAFVSGPLIDDINGKVRLAGYKEGLEKNGLSFKEGLVFEANYNYKDGFELAQRVINSGATAAFVAEDELAAGLLNGLFEAGKKVPEDFEIITSNDSPITSYTRPNLSSISQPVYDLGAVSMRMLTKIMNKEELEEKEILLNHGLTTRGTTR
Firmicutes	Streptococcaceae	3584	35143	CcpA	SGO_0773	A8AWB2_STRGC	U		Streptococcus gordonii str. Challis substr. CH1	467705	Carbohydrate metabolism, Carbon catabolism	Fructose-1,6-diphosphate, HPr, phosphocarrier protein	MNTDDTVTIYDVAREAGVSMATVSRVVNGNKNVKENTRKKVLEVIDRLDYRPNAVARGLASKKTTTVGVVIPSITNSYFSTLAKGIDDIAEMYKYNIVLANSDEDDDKEVSVVNTLFSKQVDGIIFMGYHLTEKIRSEFSRSRTPVVLAGTIDVEHQLPSVNIDYKQATIDAITFLAKRNKKIAFVCGPLVDDINGKVRLSGYKTALKSKKLSYSEGLVFESKYGYDDGYNLAERVIASKATAAFVTGDELAAGLLNGLADCGVKIPEDFEIITSDDSQISRYTRPNLSTISQPLYDLGAISMRMLTKIMHKEELEEREVVLSHGIYERNSTRK
Firmicutes	Streptococcaceae	3584	35144	CcpA	smi_0284	D3H6R4_STRM6	U		Streptococcus mitis B6	365659	Carbohydrate metabolism, Carbon catabolism	Fructose-1,6-diphosphate, HPr, phosphocarrier protein	MNTDDTVTIYDVAREAGVSMATVSRVVNGNKNVKENTRKKVLEVIDRLDYRPNAVARGLASKKTTTVGVVIPNITNGYFSTLAKGIDDIAEMYKYNIVLANSDEDDDKEVSVVNTLFSKQVDGIIFMGYHLTEKIRSEFSRSRTPVVLAGTVDVEHQLPSVNIDYKQATIDAVTYLAKENERIAFVSGPLVDDINGKVRLVGYKEALKKAGISYSEGLVFESKYTYEDGYALAERLISSNATAAVVTGDELAAGVLNGLADKGVSVPEEFEIITSDDSQISRFTRPNLTTIAQPLYDLGAISMRMLTKIMHKEELEEREVLLPHGLTERRSTRKRK
Firmicutes	Streptococcaceae	3584	35145	CcpA	SMU.1591	CCPA_STRMU	R		Streptococcus mutans UA159	210007	Carbohydrate metabolism, Carbon catabolism	Fructose-1,6-diphosphate, HPr, phosphocarrier protein	MNTDDTITIYDVAREAGVSMATVSRVVNGNKNVKENTRKKVLEVIDRLDYRPNAVARGLASKKTTTVGVVIPNIANAYFSILAKGIDDIATMYKYNIVLASSDEDDDKEVNVINTLFAKQVDGIIFMGHHLTEKIRAEFSRARTPVVLSGTVDLEHQLPSVNIDHSKAAQDAVALLAKHHDKIAFVSGPLIDDINGKVRLAGYKEGLKKKGLPFKEGLVFEAQYKYQEGYQLAQRVINSGATAAYVAEDELAAGLLNGLFAAGKKVPEDFEIITSNDSTIALYTRPNMTSISQPIYDLGAVAMRMLTKIMNKEELEEKEIVLNHGIRERGTTK
Firmicutes	Streptococcaceae	3584	35146	CcpA	SP_1999	Q97NM1_STRPN	U	*	Streptococcus pneumoniae TIGR4	170187	Carbohydrate metabolism, Carbon catabolism	Fructose-1,6-diphosphate, HPr, phosphocarrier protein	MNADDTVTIYDVAREAGVSMATVSRVVNGNKNVKENTRKKVLEVIDRLDYRPNAVARGLASKKTTTVGVVIPNITNGYFSSLAKGIDDIAEMYKYNIVLANSDEDNEKEVSVVNTLFSKQVDGIIYMGYHLTDKIRSEFSRSRTPIVLAGTVDVEHQLPSVNIDYKQATIDAVSYLAKENERIAFVSGPLVDDINGKVRLVGYKETLKKAGITYSEGLVFESKYSYDDGYALAERLISSNATAAVVTGDELAAGVLNGLADKGVSVPEDFEIITSDDSQISRFTRPNLTTIAQPLYDLGAISMRMLTKIMHKEELEEREVLLPHGLTERSSTRKRK
Firmicutes	Streptococcaceae	3584	35147	CcpA	SPy0514	Q9A118_STRP1	U		Streptococcus pyogenes M1 GAS	160490	Carbohydrate metabolism, Carbon catabolism	Fructose-1,6-diphosphate, HPr, phosphocarrier protein	MNTDDPLTIYDVAREAGVSMATVSRVVNGNKNVKENTRKKVLEVIDRLDYRPNAVARGLASKKTTTVGVVIPNIANSYFSILAKGIDDIAAMYKYNIVLASSDEDDDKEVNVVNTLFAKQVDGIIFMGHHLTEKIRAEFSRSRTPVVLAGTVDLDHQLPSVNIDYRAAVSNVVDILAENHKCIAFVSGPLIDDINGKVRLAGYKEGLKHNKLDFKEGLVFEANYSYKEGFELAQRVINSGATAAYVAEDELAAGLLNGLFEAGKRVPEDFEIITSNDSPVVQYTRPNLSSISQPVYDLGAVSMRMLTKIMNKEELEEKEILLNHGIKKRGTTK
Firmicutes	Streptococcaceae	3584	35148	CcpA	SSA_1576	A3CP61_STRSV	U		Streptococcus sanguinis SK36	388919	Carbohydrate metabolism, Carbon catabolism	Fructose-1,6-diphosphate, HPr, phosphocarrier protein	MNTDDTVTIYDVAREAGVSMATVSRVVNGNKNVKENTRKKVLEVIDRLDYRPNAVARGLASKKTTTVGVVIPNITNSYFSTLAKGIDDIAEMYKYNIVLANSDEDDDKEVSVVNTLFSKQVDGIIFMGYHLTEKIRSEFSRSRTPVVLAGTVDVEHQLPSVNIDYKQATVDAVELLAKRNKKIAFVSGPLVDDINGKIRLSGYKDGLKNKKLSYSEGLVFESKYSYDDGYHLAERVIASKATAAFVTGDELAAGLLNGLSDQGIKVPEDFEIITSDDSQVARFTRPNLSTIGQSLYDIGAISMRMLTKIMHKEELEEREVLLAHSISERKSTRK
Firmicutes	Streptococcaceae	3584	35149	CcpA	SSU05_1372	A4VW49_STRSY	U		Streptococcus suis 05ZYH33	391295	Carbohydrate metabolism, Carbon catabolism	Fructose-1,6-diphosphate, HPr, phosphocarrier protein	MLLHVDWPASKTTTVGVVIPNIANAYFATLAKGIDDIADMYKYNIVLANSDENDEKEINVVNTLFSKQVDGIIFMGYHLTDKIRAEFSRSRTPIVLAGTVDLEHQLPSVNIDYAAASVDAVNLLAKNNKKIAFVSGPLVDDINGKVRFAGYKQGLKDNGIEFNEGLVFESKYKYEEGYALAERILNAGATAAYVAEDEIAAGLLNGVSDMGIKVPEDFEIITSDDSLVTKFTRPNLTSINQPLYDIGAIAMRMLTKIMHKEELENREVVLNHGIKVRKSTK
Firmicutes	Streptococcaceae	3584	35150	CcpA	str0630	Q5M0N0_STRT1	U		Streptococcus thermophilus CNRZ1066	299768	Carbohydrate metabolism, Carbon catabolism	Fructose-1,6-diphosphate, HPr, phosphocarrier protein	MCIKFRKEVFLMNTDETITIYDVAREAGVSMATVSRVVNGNKNVKENTRKKVLEVIDRLDYRPNAVARGLASKKTTTVGVVIPNIVNSYFATLAKGIDDIATMYKYNIVLASSDDNEDHEVTVIHSLISKQVDGIIFMGHHLTEKIRAEFSRTRTPIVLAGTVDLEHQLPSVNIDYKAAVEDCVTQLAKNNEKVAFVSGPLIDDINGKLRLAGYKSGLEKNNLSYNEGLVFEAKYSYKDGFELAQRVLNSGATAAYVGEDELAAGLLNGLFAAGKSVPEDFEIITSNDSPVTSYTRPNLSSINHPLYDLGAVSMRMLTKIMHKEELEDKDVILNHGLTLRQSTK
Firmicutes	Streptococcaceae	3584	35151	CcpA	SUB0536	B9DU09_STRU0	U		Streptococcus uberis 0140J	218495	Carbohydrate metabolism, Carbon catabolism	Fructose-1,6-diphosphate, HPr, phosphocarrier protein	MNTDDTITIYDVAREAGVSMATVSRVVNGNKNVKENTRKKVLEVIDRLDYRPNAVARGLASKKTTTVGVVIPNIANAYFSILAKGIDDIAAMYKYNIVLASSDEDDDKEVNVVNTLFAKQVDGIIFMGHHLTEKIRAEFSRSRTPIVLAGTVDLEHQLPSVNIDYQAAVAEVIDILAENHKKIAFVSGPLIDDINGKVRLSGYKEGLKKNKLDYKEGLVFEANYSYKEGYELAQRVINSGATAAYVGEDELAAGLLNGLFAAGKSVPEDFEIITSNDSPVVEYTRPNLSSISQPVYDLGAVSMRMLTKIMNKEELEEKEILLNHGIKRRGTTK
Firmicutes	Lactobacillaceae	4592	44312	CcpB	LSEI_2269	Q035V9_LACC3	U		Lactobacillus casei ATCC 334	321967	unknown	null	MANIHDIARLSGFSTATVSRVINQQHYVAPSTRAAIQAVIDQLDYVPSTMAQNLSAGKTRTIGVILPHTDHPYFEQLVTGILNAAMAGNYHAVILPSRYDQSLEQDYLEDLRRHAYDGLIFTSHGLGLRTIAKYQKYGPIVVCENPGKIKLAAAYADRTPAYQEAFQWMGSQGYSKIALLLSRPYAQSATSKLTINSYVDVFGKRPSDEMIVYHMRTFEDGYQAGARLVNEHPDFILGNGDDITAGLRQYFVDHHLPIPPLMGQENQLSSRLLQMSTIDHHVTAIGAAALKLALRDDIAQTVIQSDLILR
Firmicutes	Lactobacillaceae	4592	44317	CcpB	lp_2602	F9URB0_LACPL	U	*	Lactobacillus plantarum WCFS1	220668	unknown	null	MTNIHDIARLSGYSVSTVSRVINHQKYVADDKRKKIEALIKELDYVPNRLARDLSKGQTKTIGIVLPYANHPYFARIVDGIVSAGFAKGYKVTLLPTNYDMTVERHYLEQLKSKAYDALIFTSRSNSLEALERYQKYGRIVCCEDPGTSSHLAAAYTDRLASYISALMWAKQQGCQNVGVVISRDNLISASSRVTRMAYQETYGKLPAANLFTGAVTFEDGYRAGRYFAKLKPSVDAILANGDDIGAGIQDYYRVHQLTPVKIIGQENLLSSRLMQFSTIDHHLEALGKAAFELSISHGQKHQLIKSEFIER
Firmicutes	Lactobacillaceae	4592	44319	CcpB	LGG_02273	C7TEX5_LACRG	U		Lactobacillus rhamnosus GG	568703	unknown	null	MANIHDIARLSGYSTATVSRVINGHRYVSAAARARILTVMKQLDYVPSTMAQNLSAGKTRTIGVTLPHTDHPYFEQLVTGILNAAMIGNYHAVILPSRYDQELERTYLEALRRQAYDGLIFTSHGLSLSTIAGYQRYGPIVVCEDPGQVKLAAAYADRTPAYQAAFSWMKRQGHTRIGLLLSRPYAQSATSKLTINSYVDVFGHRPEQSLVVYQMRTFQDGYRAGKMLAAKQPDFILGNGDDITAGLRQYFVDQHLPIPPLMGQENQLSSRLLNMSTIDHHVTAIGAAALKLALRAEVAQTVIQSDLILRD
Firmicutes	Lactobacillaceae	4592	44320	CcpB	LSA1554	Q38VC2_LACSS	U		Lactobacillus sakei subsp. sakei 23K	314315	unknown	null	MPTIRDIARKSGYSVSTVSRVLNQQKYVSDAAKEAIEAVIKQLDYVPNSLARDLSFGQNKNIGVVLPHNDHPYFNQLLNGIMDAAFSSGYHIVLLPSEYNRTVERDYLEQLKRKNFTALIFTSHELPLAVLEDYTRYGQIVCCENPGQHHISAVYSNREPAYLAAFNYLKSLEVQQIGLLLSRNLAKSPTWVAVTGAYQQIFHQKPDQQLMIGGMRSFEDGYRAAEQLIARQPALNCYFTNGDDIAAGVRQYHLDHQLPVPILIGQEKQLSSLLLKMPTIDHHFFTLGQKAFELALSNQHHECAFESEFIRP
Firmicutes	Listeriaceae	5721	56021	CcpB	lin2880	Q927A9_LISIN	U		Listeria innocua Clip11262	272626	null	null	MPNIKDIAKLAGVSVTTVSRVLNNHPYVAEEKRARVQAVIDELDYSPNRSAMDLARGKTNTVGVIIPYNDHPWFDKIVNGILEAAFKNRYSVTLFPTGYDPKEEEKYLMRLKTKQVDGLIITSRANNWDVILPYLAYGPIIACEYVESKDVSCSYIDRVKAYRAGFQFLQDEGYKKVAFTAGRASRESTSTYGKINAYEQVFGPVGENRFLSECYTLEDGVKAGKYFFAEGKDWPDAIYANGDEVAAGVMYHVKELGLRVPEDVAILGQENLPIGKALEITTLDHNLKKLGENAFSIFEQGKLQRIKVEHELIRRKTV
Firmicutes	Listeriaceae	5721	56022	CcpB	lmo2737	Q8Y3U4_LISMO	U	*	Listeria monocytogenes EGD-e	169963	null	null	MPNIKEIAKLAGVSVTTVSRVLNNHPYVAEEKRVRVQAVIDELDYSPNRSAMDLARGKTNTVGVIIPYNDHPWFDKIVNGILEVAFKNRYSVTLFPTGYDPKEEEKYLMRLKTKQVDGLIITSRANNWDVILPYLAYGPIIACEYVESKEVSCSYIDRVKAYRAGFQFLEDEGYKKVAFTAGRASRESTSTYGKINAYEQVFGPVGDNRFLSECYTLEDGLKAGEHFFAAGKDWPDAIYANGDEVAAGVMYHVKKLGLRVPEDVAILGQENLPIGKVLEITTLDHNLKKLGENAFTIFEQGKLQRIKVEHELIRRKTV
Firmicutes	Listeriaceae	5721	56023	CcpB	lse_2650	D3UKT6_LISSS	U		Listeria seeligeri serovar 1/2b str. SLCC3954	683837	null	null	MPNIKEIAKLAGVSVTTVSRVLNNHPYVAEEKRARVQKIIDELDYSPNRIATDLALGKTNTIGIILPYNDHPWFDKIVNGVLEAAFKNRYSVALFPTGYDTKEEEKYLMRLKTKQVDGLIITSRANNWDVILPYLAYGPIIACEYVDSPEISCSFIDRIEAYRDGFLFLQQEGYKKVAFTAGRESLESTSTYGKINAYEQVFGTVGENRFLSECYTFEDGLKAGKHFFGEGKDWPDAFYANGDEVAAGIMFHVKKIGLRVPEDVAILGQENLAIGKALEITTLDHHLKKLGENAFYIFEQGKLQNIQVKHELIRRKTV
Firmicutes	Listeriaceae	5721	56024	CcpB	lwe2685	A0AM71_LISW6	U		Listeria welshimeri serovar 6b str. SLCC5334	386043	null	null	MPNIKEIAKLAGVSVTTVSRVLNNHPYVAEEKRARVQAVIDELDYSPNRSAMDLARGKTNTVGVIIPYNDHPWFDKIVNGILEAAFKNRYSVTLFPTGYDPKEEEKYLMRLKTKQVDGLIITSRANNWDVILPYLAYGPIIACEYVESKEISCSYIDRVKAYRAGFQFLQDEGYKKVAFTAGRESRESTSTYGKINAYEQVFGSVGENRFLGECYTLEDGLKAGKHFFSEEKDWPDAIYANGDEVAAGVMYHLKELGLRVPEDVAILGQENLPIGKALEITTLDHHLKKLGGNAFSIFEQGKVQKLKVEHELIRRKTV
Firmicutes	Streptococcaceae	4591	44295	CcpB	LACR_2447	Q02VY2_LACLS	U		Lactococcus lactis subsp. cremoris SK11	272622	Sugar utilization	null	MTSLTDLSKLSGYSKATVSRALSGNGYVSPEARTIIQDLANELDYTPNAIAQELAAGTTKNIGVVLSYVKHPFFSQILEEILDKSFETGYKIVILPSNYDQNLELQYLEQLRKKAFEALIFTSRKISEETVLKYQKYGPIILCHKPKTKTISASYAEREIGYRDAFKWLKKQNCTNIGFLFSRYKSPTTSVTLQTYSEIYK
Firmicutes	Streptococcaceae	4591	44296	CcpB	L0225	Q9CDR9_LACLA	U		Lactococcus lactis subsp. lactis Il1403	272623	Sugar utilization	null	MTSLSDLSKLSGYSKATISRALSGNGYVSKETRKIILGLAKELDYTPNAIAQDLSAGTTKNIGVVLPYVKHPFFGQILEGILDKSFETGYKIVILPSNYDQNLEIKYLEQLRKKAFEALIFTSREVSEQTVHKYQK
Firmicutes	Streptococcaceae	4591	44297	CcpB	SAG0784	Q8E0E9_STRA5	U	*	Streptococcus agalactiae 2603V/R	208435	Sugar utilization	null	MTSISDIAKKAGVAKSTVSRVINHHPHVSDETRQKVMALITELDYIPNQLARDLSRGKTQKIGVVIPHTRHPYFTQLINGLLDAAKTTDYQLVMMPSDYNQELELSYLKQLKMEAIDALIFTSRAISLDIIETYAKYGRIVVCEKLQEYNHLSSAYLDRYSSFLEAFSDMKLRGLEHLVLLFSRNNESSATYQSALLAYQEVYGQLSSPYMVVGNVHDFNDGLNLSYQLVKEVSIDGILATSDEVAAGLIKGYEESRKKCPYIIGQECLLVGQLLKLPTIDHKSYYLGKLAFKQALAEKISQEVLFSEFLSQDN
Firmicutes	Streptococcaceae	4591	44298	CcpB	SDEG_0462	C5WEZ9_STRDG	U		Streptococcus dysgalactiae subsp. equisimilis GGS_124	486410	Sugar utilization	null	MTSIRDIAKLAGVAPSTVSRYLNQSDYVSQETSQIIATVIQQLDYSPNMTARQLSTGKTNRIGVIIPHTKHPYFIDIFRGLMEAALESQYQLLFLPSDYEQEIERDYLEQLKGKAFDSLIFTSRKIPLSLLESYADYGQIVLLESCTSKKISSVSIDRHQGLQELFQWLAGYNVGKCALLFSRNKATSSTFKATLSAFKANLGNQHPYETFGQVSTYEEAYRLAATLSQDPSFDAIVANGDDVAAGILIYYQEHQLQLPLIVSQEKQLSGQLLHLPSIDNNSFQLGKHAFSLATGTHVVHLTLPSQFFKNR
Firmicutes	Streptococcaceae	4591	44300	CcpB	GALLO_0712	D3HCE8_STRG3	U		Streptococcus gallolyticus UCN34	637909	Sugar utilization	null	MVTIRDIAERTGYSKATVSRVLNNHPYVSDDVRQKIQAVIKELNYTPNLVAKELSAGKTNKIAVVIPHNRHPYFTQLLNGMLDESKKTNHNLLLLHSGYNELSEREYLEQLRGRAFDGLIFTSRELPIETIASYAQYGPILLCEPLDNPLLKSVYVDRYQAYNDLNAYLVETGIKSPAYLFTRADEASATYRTMVSVLEHFPQYQNSAVFSGISNFQDGYNWAKQLTQDFDAIVTNEDQMAYGVIKAFKDNGRALPLIIGQENQHISELLGIPSVEHYSYELGKLAVRQILADENNPLAIPSKFIRR
Firmicutes	Clostridia-2	5750	56322	CD0683	CD0683	Q189M9_CLOD6	U	*	Clostridium difficile 630	272563	null	null	MNQKKVHYNKSATSKDVARLAGVSQSSVSRAFGSANGKGVKPEVRERIFRVANEIGYVPNLVARGMISGKTNVIGLIVGDSLGPFYNRIINLFVEKIQEIGKQCLVFKVPRQQSIDSIISKVIQFQVEAVIITASAMNKVMAETCEENNIPVILFNRFIPGIKISTVYVDPIEGGGMAAEYLLKKGHKNIGYIQFTRETSEEMEKKIGFYSKLRQSGIHNLKEESANYDYDSGYEAGKRMLALSNPPTAIFCTSDLIAIGVMDAARFEYKLRVPEDLSVIGYDDIQMASWKSYNLTTIRQPLDLLIEKTINILKSLLNEENPESVVEMLKPELIERGSTL
Proteobacteria/Gamma	Enterobacteriales	5493	53693	CelR	Ent638_3283	A4WE17_ENT38	U		Enterobacter sp. 638	399742	Cellobiose utilization	Cellobiose-6-phosphate	MATMLDVSLRAGVSKATVSRVLNGTGQVKESTRQQVFKAMEELGYRPNFLAQSLANQTSNSIGLVVSTFDGFYFGRLLQQASRQTETHGKQLIVTDGHDAPEQEEQAVQMLADRRCDAIVLYTRYMSEKAIMKLVHTVQTPLVVINREVAQAADRCVFFEQQDAAFKAVDYLISQGHREIACMTVPIHTPTGKARLMGYRKALEKHGIVWDDRRVKYGDAGMTQGYELCRELLSENAPFSALFACNDDMALGASKALHQAGLRIPQDISLFGFDDAPCAKWLEPALSSVYLPIDSMIVTAIDQAIRLANNQPVETIPPFTGTLVLRDSVTTGPYFVSK
Proteobacteria/Gamma	Enterobacteriales	5493	53695	CelR	ECA3649	Q6D0Z9_PECAS	U	*	Erwinia carotovora subsp. atroseptica SCRI1043	218491	Cellobiose utilization	Cellobiose-6-phosphate	MKTMLEVAKRAGVSKATVSRVLNGIGQVKQATRDAVFQAMDELGYRPNFLARSLARRTSNSIGLVISNFDGPYFGRLLRRAAEITESSGKHLIVTDGHDTPEDEMRAVQLLSDRQCDAIILYTRYMSEADLMTLLNTQTIPIMVMNRDLPQARERCIFFRQQQAAFDVVNYLIEQGHREIACITAPMQTPTARARLAGYQQALIDHQIDVDPRRVAHGTSMVASGYQAARQLLDNGISFSALFVSNDDMAIGAMKALYEAGKRLPQDVSVFGFDDEPCATYLHPSLSTVYMPIEEMAATAITQVLDLIAGKDVKPLQPFTGELKLRESVQKGPYYGQQNSR
Proteobacteria/Gamma	Enterobacteriales	5493	53697	CelR	KPN_03251	A6TDH8_KLEP7	U		Klebsiella pneumoniae subsp. pneumoniae MGH 78578	272620	Cellobiose utilization	Cellobiose-6-phosphate	MATMLDVSIRAGVSKATVSRVLNGTGQVKESTRQQVFKAMEELGYRPNFLARSLANQTSNSIGLVVSTFDGFYFGRLLQQASRQTEAWGKQLIVTDGHDTPEREEEAVQMLADRQCDAIILYTRHMSEKAIMSLINSIAMPLVVINRDVAQARERCVFFEQQEAAFQAVEYLITQGHRDIACITVPMHTPTGQARLQGYRNALIKHGIEWDPSRVKYGDSTMTRGYELCRELLDEKARFSALFSCNDDMALGASKALHQAGLRIPQDVSLFGFDDAPSAKWLEPGLSTVYLPIDNMITTAIDQAIKLANQQPIETIPPFTGTLVLRESVTTGPFFK
Actinobacteria	Micrococcineae	5479	53548	CelR	AAur_0084	A1R102_ARTAT	U	*	Arthrobacter aurescens TC1	290340	Cellobiose utilization	Cellobiose	MTQDTSGPRPVPTLEMVAALAGVSRATVSRVVNDSPSVDPEMAQSVRKAILALDYTPNRAARSLAKRRANAVTLIVPESTSKVFADPFFASVVQGIALYLTDTEYTLNMVISSESKPEKTRSFLLGGNVDGVLVVSHHSGDNSWTHLSGSLPMVFAGRPLVGGKESYYVDVANEQAAYDVTRLLTESGRKNVATIAGPQDMPPGLDRLAGWRTAVREAGLGESLVEEGDFTLASGAQAMRRLLDRGVPLDAVFAANDQMAAGAYTAIQGRGLRIPEDIAVVGFDDDSFATSVTPALTTVHHPIVELGKKMAETLVKLIEGKPAERVTRMPTSIVIRDSV
Actinobacteria	Micrococcineae	5479	53549	CelR	Achl_0403	B8HA18_ARTCA	U		Arthrobacter chlorophenolicus A6	452863	Cellobiose utilization	Cellobiose	MNANSSRPAPAAAGRPSPTLEDLALAAGVSRSTASRAINGGSKVSAQAQAAVDAAIVALGYTPNRAARSLVTRRAGSVALVIPEPDARVMMDPYFAAVIMGVNEALRETDLQLVLLMSRAGDDSARTIRYLRGGHVDGAIVVSHHRADDWVESLGATGLPTVFIGRPWDTESGIPYVDLDNFEGGRLAARHLSGAGRSKLATIAGPTDMTAAVDRLQGWLQGLREAGLQPGPVIHGDFTTAGGADAAARLLAEAPDVDGIFAASDLMALGVVDTLRQKGRQVPDEVAVVGFDNHSLQAANGLGLTTVAHPMADIAAAAGKLLVDAIANPGELPEPVIYPAELVVRGSSAA
Actinobacteria	Micrococcineae	5479	53551	CelR	Bcav_2841	C5BYX1_BEUC1	U		Beutenbergia cavernae DSM 12333	471853	Cellobiose utilization	Cellobiose	MDKDMAGTDEGRRTAPTLVEVARLAGVSRATASRALNGGLRVSPEAMDAVRRAVAELGYSPNRAARSLVTRRTDSIAVVVPESDDRVFSDPFFAVTLRGVTSALAATDIQAVLLVGQGRHDVGRVERYLRGGHTDGAIVVSHHQADTLAVTLREIGLPSVYVGRPLAPDADVPYVDVDNVAGARLAVEHLIAQGRRRIGLIAGPQDMSAGVDRLAGWRTALAAAGLDAPEPVVADFTLAGGAAAADRLMAAHPELDAVFAASDRMAAGALPIIAAHGRNVPDDVAVIGYDDLELASQTHPPLTTVVNPVIDMATRAVHMVLDQIAGRDVASPVLLTTHLVLRRSA
Actinobacteria	Micrococcineae	5479	53556	CelR	Jden_1878	C7QZW3_JONDD	U		Jonesia denitrificans DSM 20603	471856	Cellobiose utilization	Cellobiose	MMSNRIPTLEEVALAAGVSRSTASRAINGGSKVSPEAQAAVDAAIARLGYIPNRAARSLVTRRTESIALVVPEPDVRVLSDPFFAATIRGINSALKESDIQLVLLISQPGDSSARISRYLMNGHVDGAIVVSHHREDQLEELVLKSRLPSVFVGRPFSRASELTTVDVDNVAGGRVATEHLLSRGCRRIAHISGPSDMTAGEDRASGWRQALAAAGVAPGPVRGGEFTSVMGVAAMEDILAEDPSIDAVFAGSDLMAVGALRVLEKHGRRVPEDVAVVGYDDLGVAATAMPPLTTVVNPVSEMAKWATSELLFILGYITADERHAGLDTAGVVREGNMIVLPTVLVERASS
Actinobacteria	Streptomycetaceae	5272	51898	CelR	SAV_5257	Q82CT1_STRAW	U		Streptomyces avermitilis MA-4680	227882	Cellobiose utilization	Cellobiose	MAGHGARGRSGGRPTLEEVAARAGVGRGTVSRVINGSPRVSDATRAAVEAAVAELGYVPNTAARALAANRTDAIALVVPEPETRFFAEPYFSDMLKGVGSALSETEMQLLLIFAGSDRERQRLAQYLAAHRVDGVLLVSVHADDPLPDLLAQLEIPAVISGRRSAEETLPSVDSDNFGGGRVAVEHLIDQGRRNVVHLAGRLDVYGAQRRVDGYREALRDAGRPVDESLIVAGDFTEEGGRRAMTELLARCPALDAVFAGSDVMAAGARQVLREAGRRIPDDVALVGYDDSAIARHMDPPLTSVRQPIEEMGRAMIDLLLDEIADRRPAVSRGLERRQLVLPSELVRRASS
Actinobacteria	Streptomycetaceae	5272	51899	CelR	SCO2794	Q9F3I7_STRCO	U	*	Streptomyces coelicolor A3(2)	100226	Cellobiose utilization	Cellobiose	MASHGVRGRSGGRPTLEEVAARAGVGRGTVSRVINGSPRVSDATRAAVEAAVAELGYVPNTAARALAANRTDAIALVVPEPETRFFAEPYFSDMLKGVGSELSETEMQLLLIFAGSDRERERLAQYLAAHRVDGVLLVSVHADDPLPDLLTQLEIPAVISGPRSAAEPLASVDSDNYGGARSAVEHLLSRGRGRVAHITGHLAVYGAQRRVDGYRDALREAGHEVDEGLIEPGDFTEEGGRRAMAELLRRHPDVDAVFAASDVTAAGAGQVLREAGRRIPDDVALVGYDDSAIARHMEPPLTSVRQPIEEMGRAMIDLLLTEIADRRPAASRGLERHQVVLATELVERRSS
Actinobacteria	Streptomycetaceae	5272	51899	CelR	SCO7554	Q9F3C1_STRCO	U		Streptomyces coelicolor A3(2)	100226	Cellobiose utilization	Cellobiose	MTGNRRPTIKTVAARAGVGRTTVSRVVNGSELVSADARERVLAAIKELNYVPNSVARGLVTNRTNAVALVIPESESRLGSEPFFAALIRGVSGALAESRTQLQLMLVRDQAERDQLTASVATRRVDGVLLVSVHSEDRLPGMLEEMGLPTVLAGRRDAGERLSYVNSDNAGGAAAAVRHLLGGGRRRVATITGPLDMDVGRSRLAGWRAAHLEAAVPAEELLVEAGDFTEEGGASAMRLLLERVPDLDAVFAASDLMAVGALAELRRQKRQVPGDVAVVGFEDSVLARHTNPPLTTVRQPVEELGRTMARILTDITQHGAPRQQMTLPTELVVRESS
Actinobacteria	Streptomycetaceae	5272	51900	CelR	SGR_4739	B1VW57_STRGG	U		Streptomyces griseus subsp. griseus NBRC 13350	455632	Cellobiose utilization	Cellobiose	MAASRVRNGGRPTLEEVAARAGVGRGTASRVINGSPRVSDATRQAVEAAVAELGYVPNRAARALAGNRTDAIALVVPEPETRFFAEPYFSAIVRGVGAALADTEMQLLLTLVGNDRERRRLAQYLTAHRVDGVLLVAVHADDPLPELLEQLGMPCVISGARHAAETLPSVDSDNFEGARAAVEHLVSRGRRQVATITGRLEVYGAQRRLDGYRAAVSAAGLAPDERLIAPADFTEEGGARAMRDLLARRPGLDAVFVASDVMAAGARQVLREADRRIPEDVALIGFDDSVVARHMHPALTSVRQPIEEMGRRMAQLLLDEIAGRAPGDERPSVVLPTELVVRDSS
Actinobacteria	Streptomycetaceae	5272	51901	CelR	SCAB_57761	C9Z452_STRSW	U		Streptomyces scabiei 87.22	680198	Cellobiose utilization	Cellobiose	MVTGHGARGRSGGRPTLEEVAARAGVGRGTVSRVINGSPRVSDATRAAVEAAVAELGYVPNTAARALAANRTDAIAMVVPEPETRFFSEPYFSDILKGVGAQLSDTEMQLLLIFAGNDRERRRLAQYLAAHRVDGVLLVSVHADDPLPDLLSQLEIPAVISGPRSEHETLPSVDSDNYGGGRSAVEHLIARGRARIATITGRLDVYGAQRRIEGYRDALEDAGREVDERLIAPGDFTEEGGRRAMRELLARCPDLDAVFAESDVMAAGARQVLREEGRRIPDDVALVGYDDSAIARHMDPPLTSVRQPIEEMGRAMIDLLLDEIADRRPAVSRGLERRQVVLPTELVGRDSS
Actinobacteria	Streptomycetaceae	5272	51901	CelR	SCAB_2431	C9ZEK0_STRSW	U		Streptomyces scabiei 87.22	680198	Cellobiose utilization	Cellobiose	MSGNRRPTIKTVAARAGVGRTTVSRVVNGSDLVSADARARVLAAIKELKYVPNSVARGLVTNRTDAVALVIPESESRLGSEPFFAALIRGVSGALADSRTQLQLMLVRDQAERDQLTESVATRRVDGVLLVSVHSTDRLPGMLEEMGLPTVLAGRRDAGEQLSYVNADNAGGAAAAVRHLLERGRRRVATITGPLDMDVSRNRLAGWHTAHHEANLSASELLVEEGDFTEESGVRAMRSLLERAPDLDAVFAASDLMAVGALTELKRQKRQVPRDVAVAGFEDSVLARHTSPPLTTVRQPVEELGRTMARILTDITQHGAPRRQVTLPTELVVREST
Thermotogae	Thermotogales	752	7272	CelR	Fnod_1559	A7HNB9_FERNB	U		Fervidobacterium nodosum Rt17-B1	381764	Cellobiose utilization	Cellobiose	MVTIKDVAREAGVSIATVSRVINGFSNVNEETRKKVLRAIKSLGYKPMPSLRKASELLYTIGVLLPNLKGDHYNEILMAIEDYAKRNDFEVMVSVPNMLPEEEKHVLDQYFKRKIDGIILCELFGGVEYLKPFINSGVPIVALDYYIEEVVCDSVNIDNLTGAMNAMKYLYKMGHRKILYVKGPQYSPASRNREKGIKKFLDRHKDVEVFFSEHEGFNPEDGYQSVSEFLKKRGKLFTAVFSVNDWSAIGAIRALKENGLEIPEDVSIIGYDDAPYSEYLYPPLTTIRQPRWEMGQMAAQLLIDRILGKGPKIARNVLLPTQLIERQSVKKIG
Thermotogae	Thermotogales	752	7269	CelR	Tlet_1445	A8F767_THELT	U		Thermotoga lettingae TMO	416591	Cellobiose utilization	Cellobiose	MITIKDVAKYAGVSIATVSRVINGSNRVSEEVRKKVLKAIRELGYKPKPHYSLNGELLRTIGVLLPDLGGYHYSEILSGIEEYAFENNFDVMVSLTRNVPDIEKEILDEYFRRKVDGVIVCTLRSDEKLLEKFVNSGVPVVAVDSRIDELRADSVNIDNFSGAYHVMRYLYEHHHKKILYVPGPSNVYASYEREKGIEKFLSKYRDVEFSSCNIRGFNPDTGYTGVKNNLKKYGKNFTAIFSVNDYVALGVITALNEAGLKIPEDVSLISFDDAPFASYTVPPLTTVSQPRWQMGRIGARILIEKLSNQLKKILRTVVLPTHIVERKSVSTI
Thermotogae	Thermotogales	752	7264	CelR	TM1218	Q9X0U5_THEMA	U	*	Thermotoga maritima MSB8	243274	Cellobiose utilization	Cellobiose	MASIKDVAKLAGVSIATVSRVINGYNNVSEETRKKVIDAIRKLNYHPVYAVKGAVLKRTIGVLVPNFGGFHYNEILTGIEKEAIKRDFTLMISTTLHRTSVELERLEVFFAKRVDGIIVCSSKKDEEQLERLIKSAIPVVVVDREEPEIRLDNVGIDNYAAGRMCAKYLLEKGHRKVLLLKGRKDIYSFSDRERGFIDYSTRHGIDVKVTPCGYFAEHGYHAVERYLKKHGRDFTAIFAINDLSAFGALKALHDLGVLVPDEVSVMGFDDDPISSYTIPPLTTVRQPREEMGRVAFEILYERLSGKKGVARRVVLPVEIVERESVKQL
Thermotogae	Thermotogales	752	7268	CelR	Tnap_1574	D2C4J6_THENR	U		Thermotoga naphthophila RKU-10	590168	Cellobiose utilization	Cellobiose	MPSIKDVARLAGVSIATVSRVINGYDNVSEETRKRVIDAIRKLNYHPVYAVKGAVLKRTIGVLVPNFGGFHYNEILTGIEKEAIKRDFTLMISTTLHRTSVELERLEVFFAKRVDGIIVCSSKKDEEQLERLIKSAIPVVVVDREEPEIRLDNVGIDNYAAGRMCAKYLLEKGHRKVLLLKGRKDVYSFSDRERGFIDYSTRHGIDVKVTPCGYFAEHGYHAVERYLKKHGRDFTAIFAINDLSAFGALKALHDLGVSVPDEISIMGFDDDPISSYTIPPLTTVRQPREEMGRVAFEILYERLSGKKGVARRVVLPVEIIERESVKQL
Thermotogae	Thermotogales	752	7266	CelR	CTN_1353	B9K996_THENN	U		Thermotoga neapolitana DSM 4359	309803	Cellobiose utilization	Cellobiose	MASIRDVARLAGVSIATVSRVINGYNNVSEETRKKVIDAIRKLNYHPIYAVKNAVLKRTIGVLVPDFGGFHYNEILTGIEKEAIKRDFTLMISTTLHRTSVELERLEVFFAKRVDGIIVCSSKKDEEQLERLIKSAIPVVVVDREEPEIRLDNVGIDNYAAGRMCAKYLLSKGHKKVLLLKGRKDIYSFSDRERGFIDYSTRHGIDVKITPCGYLPEHGYHAVERYLRKQGIDFTAIFAINDLSAVGALKALHDLGVAVPDEISIMGFDDDPISNYTIPALTTVRQPREEMGRVAFEILHERLLGKKGVARRVILPVEIIERESVKQL
Thermotogae	Thermotogales	752	7267	CelR	Tpet_1550	A5IMY5_THEP1	U		Thermotoga petrophila RKU-1	390874	Cellobiose utilization	Cellobiose	MPSIKDVARLAGVSIATVSRVINGYDNVSEETRKRVIDAIRKLNYHPVYAVKGAVLKRTIGVLVPNFGGFHYNEILTGIEKEAIKRDFTLMISTTLHRTSVELERLEVFFAKRVDGIIVCSSKKDEEQLERLIKSAIPVVVVDREEPEIRLDNVGIDNYAAGRMCAKYLLEKGHRKVLLLKGRKDIYSFSDRERGFIDYSTRHGIDVKVTPCGYFAEHGYHAVERYLKKHGRDFTAIFAINDLSAFGALKALHDLGVSVPDEVSVMGFDDDPISSYTIPPLTTVRQPREEMGRVAFEILYERLSGKKGVARRVVLPVEIIERESVKQL
Thermotogae	Thermotogales	752	7265	CelR	TRQ2_1600	B1LCC8_THESQ	U		Thermotoga sp. RQ2	126740	Cellobiose utilization	Cellobiose	MASIKDVAKLAGVSIATVSRVINGYNNVSEETRKKVIDAIRKLNYHPVYAVKGAVLKRTIGVLVPNFGGFHYNEILTGIEKEAIKRDFTLMISTTLHRTSVELERLEVFFAKRVDGIIVCSSKKDEEQLERLIKSAIPVVVVDREEPEIRLDNVGIDNYAAGRMCAKYLLEKGHRKVLLLKGRKDIYSFSDRERGFIDYSTRHGIDVKVTPCGYFAEHGYHAVERYLKKHGRDFTAIFAINDLSAFGALKALHDLGVLVPDEVSVMGFDDDPISSYTIPPLTTVRQPREEMGRVAFEILYERLSGKKGVARRVVLPVEIVERESVKQL
Proteobacteria/Gamma	Vibrionales	5330	52338	CelR	PBPRA0499	Q6LUU6_PHOPR	U		Photobacterium profundum SS9	298386	Cellobiose utilization	Cellobiose-6-phosphate	MARIKDVALLAGVNRSTVSRIINGEGKFRADTKRKVEQAMADLNYRPSAIARSLATASSNMTGLLVTDYTGGFFGEMMNQVQTELDLHKKFLITAQGHHSAEGERDAICRFHALRCDGYVLNSRYLSDDELRLLAKEPTPFVLLDRSVEGLESRCITFDHSLAGQMAVDHLINQGHRKIACITGLLNRTNSRQRYQGYLNALSTADITVDLTLCAEGNYGRESGYLAAKKLYHSHPDLTALFFM
Proteobacteria/Gamma	Vibrionales	5330	52340	CelR	VC1286	Q9KSH0_VIBCH	U		Vibrio cholerae O1 biovar eltor str. N16961	243277	Cellobiose utilization	Cellobiose-6-phosphate	MARIKDVAELAGVNRSTVSRIINGEGKFKEETRRKVEQAMAQLNYRPSAIARSLATSSSNMMGLLVTYYTGGFFGEMMEQVQTELDMHHKFLITAQGHHSAQGEREAIQRFHDLRCDGYVLHSRYLSDDDLRALAQQPTPFVLLDRYVAGLEERCITFDHRGASQIVVEYLIQQGHRKIACITGPLHRHNSRLRQQGYLDALAQAGILPSKSLCEEGNYGRKSGYFAMQQLFARHPEITAVFSCSEEMTTGALQYLHEQGIAVPGRISIVSFDSVDLCESLYPTVTAVHFPISEMARAAVQSLIAMVKQQPTVGPQSFRPILKKRHADQPLSKIAERQDS
Proteobacteria/Gamma	Vibrionales	5330	52342	CelR	VIBHAR_03620	A7MTM6_VIBCB	U		Vibrio harveyi ATCC BAA-1116	338187	Cellobiose utilization	Cellobiose-6-phosphate	MARIKDVAELAGVNRSTVSRIINGEGKFREETKKKVEAAMAELNYRPSAIARSLATSSSNMVGLLVTYYTGGFFGEMMEQVQTELDMHKKFLITAQGHHSAEGEKEAIQRFNDLRCDGYVLHSRYLSDDDLRELAKLPTPFVLLDRYVEGIEERCVTFNHHHASRIAVEHLIAGGHKHIACISGPSQRHNSLLRKLGYVDAMKTAGINIDESWCEEGNYGRQSGYDAMAAIYLRHPEVTAVFSCSEEMTVGAMQFLHEKRIPVPEQISLVSFDSVDLCESLYPTVSAVHFPISEMARVAVQTLMGLIKDQQSHTKPVFEAELKLRKADRTLL
Proteobacteria/Gamma	Vibrionales	5330	52343	CelR	VP2632	Q87LI0_VIBPA	U	*	Vibrio parahaemolyticus RIMD 2210633	223926	Cellobiose utilization	Cellobiose-6-phosphate	MARIKDVAELAGVNRSTVSRIINGEGKFREETRKKVEQAMAQLNYRPSAIARSLATSSSNMVGLLVTYYTGGFFGEMMEQVQTELDIHKKFLITAQGHHSAEGEKEAIQRFNDLRCDGYVLHSRYLSDDDLRELAKLPTPFVLLDRYVEGIEERCITFNHHHASRIAVEHLIAGGHKNIACITGPSLRHNSLLRKLGYVDAMKTAGIDIDESWCEEGNYGRQSGYDAMASILKRHPEVTAVFSCSEEMTVGAMQYLHEHKISVPEQISLTSFDSVDLCESLYPTVSAVHFPISDMARAAVQTLMGLVKKQEHIEKPVFEAKLKLRHADRVLKQDSD
Proteobacteria/Gamma	Vibrionales	5330	52347	CelR	VV1_1487	Q8DCD4_VIBVU	U		Vibrio vulnificus CMCP6	216895	Cellobiose utilization	Cellobiose-6-phosphate	MLAVTFYEEALSASNWVEGMARIKDVAELAGVNRSTVSRIINGEGKFKEETKKKVEWAMAQLNYRPSAIARSLATSSSNMVGLLVTYYTGGFFGEMMDRVQTELDQHNKFLITAQGHHSAQGERDAIQRFHDLRCDGYVLHSRYLSDDDLRELAQQTTPFVLLDRYVEGLEERCITFDHRAASLIAVNHLIHQGHRQIGCITGPSQRYNSQLRKQGYLDAMKQIEHQGGGALCIEGDYGRKSGYRAMQVLLEREPTLTAVFSCSEEMTIGALQYLHEKKIAVPEQISIVSFDSVDLCESLYPTVTAVHFPISEMAEVAVQTLIHLIKDQPLTPLDGFQPILKRRNADRTI
Proteobacteria/Gamma	Enterobacteriales	5448	53335	CelR2	Spro_4592	A8GKP5_SERP5	U		Serratia proteamaculans 568	399741	Cellobiose utilization	Cellobiose-6-phosphate	MMVTLEDVAALAGVSRATVSRVVNGDTNVKGQTREKVEKAVAQLGYTPNPAARALASSHSNTLGLVTTSYRGGFFGALMDFVQTEAESHGKQLLVTQGRNSAENEWQAIQRLFNLRCDGVILHVRFLSDDQLRQLAAEQRRFVLLDRLVPGLEAHCVTFDHQYASRMATQQLIDAGHRHIACISGPRDRPSSLLRLQGFEQAMQAAHIKPVACAEGLYDLESGYRCADQLLKMKTLPTAIYCCNEEMAIGALLAVNEHRLRVPQDISLICYDSGERAPFVRPALTSVHFPISEMAQYAARLLIDPATPPVSFAPIVISRDSIVTASK
Proteobacteria/Gamma	Enterobacteriales	5448	53336	CelR2	y3949	Q7CFV7_YERPE	U	*	Yersinia pestis KIM	187410	Cellobiose utilization	Cellobiose-6-phosphate	MVTLEDVAVLAGVSRATVSRVVNGDTNVKALTREKVEQAVAVLGYTPHPAARALASSQSNTLGLVTTSYRGGFFGALMDFVQTETESQGKQLLVTQGRDNADKEWLAIQRLYNLRCDGLILHVRFLSDERLRQLAAANRPFVLLDRLVPDLEARCVTFDHHHASQMATQVLIDAGHRDIACISGSSQRQSSVLRIQGFLDAMQLAGLEPVACLEGVYDLESGYLRADEILKQPRLPTAIYCCNEEMAIGALLAINKHGLQVPQDISLICYDSGERAPFVCPALTSVHFPIVEMAQYATQLLIDPLIPAVNFPPAIIMRDSVMPPKTAC
Proteobacteria/Gamma	Vibrionales	5384	52792	CelR2	VC1557	Q9KRS9_VIBCH	U	*	Vibrio cholerae O1 biovar eltor str. N16961	243277	Cellobiose utilization	Cellobiose-6-phosphate	MRTQFEGLLMATINDVCKLAGVSKATVSRVLNETGQVKAQTREAVLAAMQQLGYQPNSLAQALATNTTNSIGLVLPHFESSYFGSILFEAEQGAQKAGKKLLVMNSKNSEQGEKEAVATLAAQRCDAILLYSRHLNEVQLLELQQQHPSPLVILNRRLHHPQLHSFGLDQTQIAQLAMQHLLNLGHRQIACITSPLVSETGKIRYQVYQQALHEQGIELSSSLVIEGDNTLLGGYQAMQQLLQQGISMTAVFACNDDMALGAMRAMHEHGIHVPKQVSIIGIDNEPAAAFAIPSLSSVSLPIGELTQQAISLAVEIANKKPQDAQHRLYQGSLIARESTIALKL
Proteobacteria/Gamma	Vibrionales	5384	52793	CelR2	VF_0608	Q5E793_VIBF1	U		Vibrio fischeri ES114	312309	Cellobiose utilization	Cellobiose-6-phosphate	MATINDVCKLAGVSKATVSRVMNGKGPVKEETKKLIFDAMETLDYKPSLVAQALATNSSNSIGLIVSFFDGYYFGILLKEATRIAEESGKQLIVTDGHNQVETEIEAINSLVARKCDAILIYSRTMTADDYCEIQKKLPIPLVVINRTLPDGLGHAVAFDQYNASQMAIEHLVGLGHKNIAIITLNMTSSTGQIRLKGAKETLEKHGIAYDDNLTIIKNGKLEDGYQACKELLKRSQDISAIFCFNDHLALGAIKALKEMNIRVPEDISIVGIDNDEISAFLSPALTTINIPIQKVTQLAMDKALRLISDKEVKATTEILKGNIIVRESTKNIN
Proteobacteria/Gamma	Vibrionales	5384	52796	CelR2	VSAL_I0708	B6EGW6_ALISL	U		Vibrio salmonicida LFI1238	316275	Cellobiose utilization	Cellobiose-6-phosphate	MATINDVCKLAGVSKATVSRVMNGKGPVKEETKKLIFDAMETLNYKPSLVAQALATNSSNSIGLIVSFFDGYYFGILLKEATRIAEESGKQLIVTDGHNQLETEIEAINSLVARKCDAILIYSRTMTATDYCKIQETLPIPLVVINRTLPDGLGHAVAFDQYDASRMAIEHLIELKHKNIAIITISLASSTGQIRLQGAKETLEKHGVHYDESLTIVKHGKLEDGYQACKELLSKSDKITAIFCFNDHLALGAIKALKEMNLRVPEDISIVGIDNDEISAFLSPALTTINVPIQEITQLAMNKALALISDKDIKPTTEVLTGELIIRDSSIYNKNK
Proteobacteria/Gamma	Vibrionales	5358	52558	CelR3	PBPRB2003	Q6LFT2_PHOPR	U	*	Photobacterium profundum SS9	298386	Cellobiose utilization	Cellobiose-6-phosphate	MATITDVSRLANVSKATVSRVLSGTRGVREDSRQAVLRAADELQYKPNAAAQALAGKASEYVGVILSSADAGRISSYLPLIAKGLQKYSKHMLVHFAETREEQKALVNELGNGHCSAIILIGGKDADLQSDKLIHLDGVALDSPYSIGFNYSFAAESACRFLMSKGHRNIALIIDSNKDASSLKTVEGYKLALQNQALPFNRQLVVETNSNPEEAVMALLNSYTQFSAVVVMHDSHAAHAMRLFREFNLAVPQEVSIISIEDSELAGQLNPPLTCISFPSEQLVDESMRMLGELLNNRPTQVQEQEQRALSGRLISRESVSTHR
Proteobacteria/Gamma	Vibrionales	5358	52562	CelR3	VSAK1_16482	A6CUK7_9VIBR	U		Vibrio shilonii AK1	391591	Cellobiose utilization	Cellobiose-6-phosphate	MATITDVSLLANVSKATVSRVMSGSRGVKPESREAVLRAAEELNYRPNAAAQTLANQRSDYIGVILSSTDAGQVSTYLPLLAKSLKAKGKHMLVQFAETPAEQVRIVEDLNQRHCDAIISLGGTVEELKNDNIIAIDSLADPSHSIGYDYKFASESACRFLSSKGHSSIAIVVDDESYASNQVIEGYKTSLQNSAMPVNRQLIVTANGNSEQAIMSLLNSYHPFTALVVMRDSQAAVAMNLFRDFNLATPQEVSIVSLEDSQLASQLNPPLTCISYPSQQIVDFAMEQLDAILDDKPMTPKPLITGRLVTRDSVTNRS
Actinobacteria	Corynebacteriaceae	5703	55880	Cg2314	cg2314	Q8NNS6_CORGL	U	*	Corynebacterium glutamicum ATCC 13032	196627	Sugar utilization	null	MASKRPTMADVAKAAGVSTALVSIVFRDAPGASESTRNHVKEKAAELGYIPDRRAQKLRQNRSGLIGVAFEMHQAFHGDIVEHLYPTARKHGFDLYLSAITPTRTEKDAVNALIRERCEAVILLGSRMSPSDLETIAQQLPVQVIARGSGTPKVSSVHVDDAVGAQLALNHLIELGHEHIIYIDGGDAPGTQERSEVFKAHIDSFAGTTRIVPGGSSEAAGAQAISEILDSGTDATAILAFNDRVALGVLDILWQRGIHVPEEISVVGYDNSSLASLDHIGLTTIAQDSEAIAAKAIDVTINQINNHTETSAVLTPTLITRRTTGPRPQKAI
Proteobacteria/Gamma	Enterobacteriales	5497	53741	CscR	KPN_03263	A6TDJ0_KLEP7	U	*	Klebsiella pneumoniae subsp. pneumoniae MGH 78578	272620	Sucrose utilization	Sucrose	MAEEKMASLKDVAKLANVSLMTVSRALNTPERLKPETLARVQAAIAETNYVPDLSAKKIRGARATPSTIGVLALDTVTTPFSVEITLSIEETARAHGWNSFVVNMFSDDRPEAVVDLLLSHRPDGIIFTTMGLRQVPLPEKLLTLPCVLANCESLSQPVASYIPDDEQGQYDAVKALLAAGYRRPLCLHLPASQPATIRRRLGLERACREAGIEPDHLSHSYMGQGDEHYHDIPAVVLAHIREGKPGFDSVICGNDRIAFMVYQTLLGQGLRIPQDVAVVGYDNMVGIGDLFLPPLSTVQLPHYDIGRLSALHIIHGDNHRETRKVASPWLPRASH
Proteobacteria/Gamma	Enterobacteriales	5497	53743	CscR	PMI2191	B4F1Q8_PROMH	U		Proteus mirabilis HI4320	529507	Sucrose utilization	Sucrose	MASLKDVARLASVSLMTVSRAINNPELLKPDTLKQVQRAIEELNYVPDFSARKIRGQGTKVSSIGVLGIDTATTPFSVEMILSIERTARQFGWSSFVVNLTEQDGYDQAIWQLLAQRPDGIIYTTMGLREITVHEKLRDKNVVLANCLAKDQTFPTYIPDDYHGQYFAIKHVIEKGYRHPLCFYLPEDTVAGPIRRKAVEDAWQDAGLPLSSLRQYTMLFGDEHYRDVIGLLQQHCRQQKADFDILICGNDRIAFLAYQVLLSMGLRIPEQVAVLGYDNMIGTGELFYPPLTTVQLPHYDLGKEATLHIIQERNHNKTVQVPCQLIERESL
Proteobacteria/Gamma	Enterobacteriales	5497	53745	CscR	Spro_2081	A8GDJ4_SERP5	U		Serratia proteamaculans 568	399741	Sucrose utilization	Sucrose	MASLKDVAKLAGVSLMTVSRAINEPDKLRPDTYQRVKLAIDQLDYVPDLAARRIRGDSSRVQTLGVLALDTATTPFSVDMILSIEKTAREHGWNSFVVNLFADDSAEHTIDLLLAHRPDGVIFTTMGLRQVSLPAKLLDKKLVLANCVCPEHAVASYIPDDEQGQYDAMRTLIAKGYRAPLCIHLPENTLAAGLRRRGLERAWREAGGDVERLRQYHLDLTDGDEHYRDSVELLQRHFSPGQRDCDVVVCGNDRVAFMVYQVLLAQGWKIPQQVGVLGYDNMVGIGQLFLPPLTTVQLPHYELGRQAALHLINQLDHRETRKVACPLLLRESL
Deinococcus-Thermus	Deinococcus-Thermus	5326	52305	DR2501	Deide_01360	C1CYC1_DEIDV	U		Deinococcus deserti VCD115	546414	Sugar utilization	null	MARHLGVSVATVSNAYNRPDQLSLELRERILKGAHELGYSGPDPLARSLRRGRTGVIGVVYDAPLDYAFADPAAALFLGSVAHTIQEQGLNLLLLACPHGPQPVHGASVDGFIVYCAAQGSELLRAVLGRQLPTVLVDQHPVGGAMLVGIEDAAGARAAAAHLAALGHTHIGVLCLGLNQPGSLGATPEGSYRTTTERLNGYRQGAPQATLFLVETLQNTPEEGERRAREVLQAQPEVTALLCMSDVLAQGALHAARQLELVVPADLSVIGFDDLPSSASLDLTTVWQPTSDKGEQVGQAVLALLRGDHPADVTLPTRLVLRGTTAPASRSSQDQSTGDG
Deinococcus-Thermus	Deinococcus-Thermus	5326	52306	DR2501	Dgeo_2243	Q1IW47_DEIGD	U	*	Deinococcus geothermalis DSM 11300	319795	Sugar utilization	null	MSPAKLPVRRVTLRDVAARLGVSPATVSNAYNRPDQLSPELRERVLRAAHELGYSGPNPLARSLRRGRTGVIGVVYDSSLHSAFADPAASLFLGGVARAVQDEGLNLLLLAAVRGAAPAVESASVDGLILYATTAASPALAAARTRALPAVLVDQAPQPGFPLIGIEDERGAEAAARHLLEWGHREIGVLALPFGPNAAPNVHLRARLHGYRRALRGSAGQLYIGASPDNSPESGERLTRELLAAQPQVTALLCMSDVLAQGALRAAAGAGLRVPGDLSVVGYDDIPSSTALNLTTVHQPTAEKGLEAGRAMLALLRGETPPSVTLPTRLVVRGSSGAP
Deinococcus-Thermus	Deinococcus-Thermus	5326	52307	DR2501	DR2501	Q9RRI9_DEIRA	U		Deinococcus radiodurans R1	243230	Sugar utilization	null	MSAAKAAPGSARPRATLRDVARAVGVSVATVSNAYNRPDQLSAGLRDKVLAAARDLGYQGPDPLARSLRRGKTGVIGVVYDAPLEYAFADPAAALFLGSLSRSLRAEGLNLLLLSASQDPAPVRSASVDGLILYCASEGSDLLAAVLERGLPTVLVDQQPQPGAVGVGIDDAGGARAAAAHLVALGHRDIGVLCLELGPEPLGGPVSPKREAQAAYHTTAERLRGYRAGADAARLWPYECSQNTPADGEAQARALLTAQPEVTALLCMSDVLAQGAYQAAQTLGRRVPEDLSLIGYDDVPLSAALNLSTVWQPTAEKGRRVGEALLAQLSGEVLDPEVLNPSPLPTRLVVRGSTAERQG
Proteobacteria/Gamma	Enterobacteriales	1239	11434	EbgR	b3075	EBGR_ECOLI	R	*	Escherichia coli str. K-12 substr. MG1655	511145	Galactosides utilization	Beta-galactosides	MATLKDIAIEAGVSLATVSRVLNDDPTLNVKEETKHRILEIAEKLEYKTSSARKLQTGAVNQHHILAIYSYQQELEINDPYYLAIRHGIETQCEKLGIELTNCYEHSGLPDIKNVTGILIVGKPTPALRAAASALTDNICFIDFHEPGSGYDAVDIDLARISKEIIDFYINQGVNRIGFIGGEDEPGKADIREVAFAEYGRLKQVVREEDIWRGGFSSSSGYELAKQMLAREDYPKALFVASDSIAIGVLRAIHERGLNIPQDISLISVNDIPTARFTFPPLSTVRIHSEMMGSQGVNLVYEKARDGRALPLLVFVPSKLKLRGTTR
Proteobacteria/Gamma	Enterobacteriales	1239	11439	EbgR	Spro_1972	A8GD85_SERP5	U		Serratia proteamaculans 568	399741	Galactosides utilization	Beta-galactosides	MATLKEIAEAANVSVATVSRVLNDDPTLSVKAQTRQKILEAAERLEYKVQPSKRHSGHRLTFAALFTYKQGIEINDPYYLAMRYGIETQCEKLGISLVACYDFNGEKALPAADGLLVIGRPQPVLHEQLGQQKVPVVFLDGVVEDPQFDCVNVDLYKISQKVIDYFIGRGYSRIGFIGGRDDPAFADQREQAFVEYGRLKNVVQPQDIYIGDFSSQAGYQCAKRMLEDTSDYPPALLVATDSIAIGVLRALHEKGIQVPGQIALISVNDIPTARFIFPALSTVRIPSETLGAQAVNLLMERIRDERTIPLSIFVPSSLQLRDTTLA
Proteobacteria/Gamma	Psychromonadaceae/Aeromonadales	5760	56414	EbgR	AHA_0204	A0KER6_AERHH	U	*	Aeromonas hydrophila subsp. hydrophila ATCC 7966	380703	Galactosides utilization	Beta-galactosides	MATLKEIALEAGVSQATVSRVLNEDPTLSVKEETKQKIFEIAERLEYKTSGARKGVHKSKLHFLAVYAYPQSTEVNDPYYLAIRYGIETQCARLNIELTHFYNGAEGRDLSAVDGILVIGHLPAERLAALHSLSAQLVFVDCRSQGDFDSIDVDLALISQQVVDFFIAQGHQRIGYIGGQDDGPDLRELAFLDYGQRLGVVQESDLYRGDFSSASGYKLAKEMLAGDWPRALFVASDSIAIGVLRAIHEKGIAIPQQIELISVNDIPTAKFTFPPLSTVRIHSELMGSQGVNLLVERLRDERDVPLRVLVPSKLTLRGTTR
Proteobacteria/Gamma	Psychromonadaceae/Aeromonadales	5760	56416	EbgR	PCNPT3_06111	M4UKG6_9GAMM	U		Psychromonas sp. CNPT3	314282	Galactosides utilization	Beta-galactosides	MATLKKIAGEAKVSLATVSRVLNEDPTLSVKEETRRRIFEIAEKLEYKTSRTRKLAASLPTNTKPPLNFLALYCYKQDIEINDPYYLAIRHGIEIQCAKFNITLTNSYEANLDIHEKHLDGVLLIGRQTKDTLKALKKRCKNIVYIDYTDHDQDFDSVDIDLIKISKEVVNFFINQSYNRIGFIGGRDNQEIPDIREKAFYEYGKLKGVVFKNDLYCGDFSSLSGYQLAKEMLKTDHPKAFFIASDSIAIGVLRAIHEQGLSIPDDIALISVNDIPTAQFTFPSLSTVRIHSELMGSQGVNLLIERQRDNRKIPLRVYIPSDLRLRNTTK
Proteobacteria/Gamma	Vibrionales	5759	56402	EbgR	PBPRA2083	Q6LQE1_PHOPR	U		Photobacterium profundum SS9	298386	Galactosides utilization	Beta-galactosides	MATLKEIANEAGVSLATVSRVLNDDPSLSVKEETKRRIFEIAEKLEYKTSSSRKVSTKQRLNVLAIYNYKQDVEFNDPYYLSIRHGIETQCEKLGISLTNVYESKVNNKLKHIDGILLVGRLPNEQLATVKALSTNIAYVDYTDFDQDFDSVDIDLARISQEVINFFIAQDYNRIGFIGGQDCANKSDVREVAFTEYGQLKGVVSSADIHRGDFTSSSGYKLAKKMLAGDHPKALFIASDSIAIGVLRAIHEQGLSIPEDITLISVNDIPTAKFTFPSLSTFRIHSELMGSQGVNLLMERSRDGRTIPIRSYVPSKLRLRDTTKK
Proteobacteria/Gamma	Vibrionales	5759	56403	EbgR	VAS14_15119	Q1ZTV1_PHOAS	U		Vibrio angustum S14	314292	Galactosides utilization	Beta-galactosides	MATLKDIANEAGVSLATVSRVLNDDPSLSVKEQTKQRIFEIAEKLEYKTSSSKKAVVEKKQQHCFVALYSHKQEAEVNDPYYLSIRHGIETQCDKLDIDLINCYDGKFDSHDVTISGVLIVGRCSDKLLKELSKKTDNICFVDFSDNSERYDSVDIDLERISKQIVDFFIQQGYPRIGFIGGQDQANTADIREIAFSEYGQLKGVVDNKDIYRGDFSSASGYKLAKQMFANGDCPSALFIASDSIAIGVLRAIHEQGLAIPEDIALISVNDIPTAKFTFPSLSTVRIHAEMMGIQGVNLLLEKARDGRTMPLQVYVPSKLKLRGTTK
Proteobacteria/Gamma	Vibrionales	5759	56405	EbgR	VF_A0348	Q5E0M8_VIBF1	U		Vibrio fischeri ES114	312309	Galactosides utilization	Beta-galactosides	MATLKEIANEAEVSLATVSRVLNEDPTLSVKEETKRRIFEIAEKLEYKTSSTRKLASALPKIAKEQLHFLALYNYKQETEVNDPYYLAIRHGIETQCDKFDITLTNSYESSLDIKNSKVDGILLVGRQTKEQLKAIQKISKNIVYIDYTDHEQNFDSVDIDLARISKEVINYFMNQGYQRIGFIGGQDDENCSDIREEVFAEYGQLKGVVSESDLYRGDFSSSSGYKLAKEMLETDYPNAWFIASDSIAIGVLRAIHEKGLRIPEDIALISVNDIPTAKFTFPSLSTVRIHSELMGSQGINLLLERRRDERAIPVRVYIPSKLRLRDTTKK
Proteobacteria/Gamma	Vibrionales	5759	56406	EbgR	VIBHAR_03334	A7MZJ7_VIBCB	U		Vibrio harveyi ATCC BAA-1116	338187	Galactosides utilization	Beta-galactosides	MATLKDIATEAGVSLATVSRVLNDDPTLSVKEETKHRILEIAEKLEYRTSSSKKATKEAKQKHHFLALYNYKQEAEVNDPYYLSIRHGIETQCDRLGITLTNCYDSVIDVETQKITGILLVGKTDKAIINKLPKRLADSICYIDFSDSNSMYDSVDIDLARISKQVVDFFVEQGYQRIGFIGGQDEPNTADIRENAFVEYGNLKGVVSENDIYRGDFSSLSGYDLAKAMLAKGDFPTALFIASDSIAIGVLRAIHEFGLNIPQDIALISVNDIPNARFTFPPLSTVRIHSEMMGIQGVNLLVEKYRDGRALPLQVHVPSKLKLRGTTK
Proteobacteria/Gamma	Vibrionales	5759	56407	EbgR	VP2402	Q87M56_VIBPA	U	*	Vibrio parahaemolyticus RIMD 2210633	223926	Galactosides utilization	Beta-galactosides	MATLKDIATEAGVSLATVSRVLNDDPTLSVKEETKRRILEIAEKLEYRTSSSKKATKEAKQKHHFLALYNYKQEAEVNDPYYLSIRHGIETQCDKLGITLTNCYNSEIDVETQKITGVLLVGKVDQKVVNKLPKRLADSICYIDFSDPTSPYDCVDIDLVRISKQVVDFFVQQGYERIGFIGGQDEPNTADIRENAFVDYGNLKGVVSEDDIYRGDFSSLSGYDLAKEMLAKGDFPKAMFIASDSIAIGVLRAVHEFGLNIPDDIALISVNDIPTARFTFPPLSTVRIHSEMMGIQGVNLLVEKYRDGRALPLQVYVPSKLKLRGTTR
Proteobacteria/Gamma	Vibrionales	5759	56409	EbgR	VSAK1_18699	A6CXR7_9VIBR	U		Vibrio shilonii AK1	391591	Galactosides utilization	Beta-galactosides	MATLKDIANEAGVSLATVSRVLNDDPSLSVKEQTKLRILEIAEALEYKTSSSKKSIQPKKHSHHFMAIYNYKQEAEVNDPYYLSIRHGIETQCEKLGIKLVNCYEGELAHSDAKITGILFVGRCPETVRSEAESITDNICFIDFSDPNSKYDSIDIDLTKISKEIIDFFINQGFNRIGFIGGQDTPNSSDIREMAFVEYGSLKGVVSLDDIYRGEFTSQSGYESAKKMFSNNNFPRALFIASDSIAIGVLRAIHEHGLKIPEDISLISVNDIPTAKFTFPSLSTVRIHSEMMGIQGVNLLMEKARDGRALPLKVYVPSKLKLRGTTKE
Proteobacteria/Gamma	Vibrionales	5759	56411	EbgR	VV1_1769	Q8DBP2_VIBVU	U		Vibrio vulnificus CMCP6	216895	Galactosides utilization	Beta-galactosides	MATLKDIATEAGVSLATVSRVLNEDPTLSVKEETKRRILEIAEKLEYRTSSAKKNSVAAVPAHHFLALYNYKPEAEINDPYYLSIRHGIETQCEKLGIDLTNCYDSKIDPDVKKITGVLMVGKTTPAAMLRASKMTDNICYLDFSDDHGDFDSVDIDLVKISKEVTDFFISQGFDRIGFIGGQDEPGQADIREMAFAEYGQLKGVVNEADIYRGDFSSSSGYKLAKSMLERSDYPKALFIASDSIAIGVLRALLEHGLNIPRDVSLISVNDIPNARFTFPPLSTVRIHSEMMGIQGVNLLVEKARDGRALPLKVYVPSKLKLRGTTQERSQA
Proteobacteria/Gamma	Enterobacteriales	5757	56385	ECA4246	ECA4246	Q6CZA7_PECAS	U	*	Erwinia carotovora subsp. atroseptica SCRI1043	218491	Sugar utilization	null	MTVSKPGYVSAQDVARRAGVSRSAVSRSFTPGASVSAATYAKVMTAAQELGYQVNDLARGLLANSSRLVGLVVTHPEVGFRANLVAELSQALIQRGSIPVLINTSHVREAMVAARSILFGHRAEATIVLSGSPPKEFVELAQLNGQPLIVIGRHEPVCDSVHIDNDTAARMAARLFASSGRTRLALAGATSATPNIIEREQAFCDEAQRLGLPVTVVRGGDTDYDDGLTVGQTLFSFPEAARPDAVFCVNDLVAFGVIDRAKQCGLTVPQDLMVIGFDDIPAAGWDAYALTTFRQDPATMAAQALALLDRRQSQVQEPACRAKVAAPLIRRQSA
Firmicutes	Enterococcaceae	5733	56166	EF1410	EF1410	Q835G7_ENTFA	U	*	Enterococcus faecalis V583	226185	Sugar utilization	null	MTSIIDVAKVAGVSKSTVSRLISGKGYVSADSQEKILKAMKELNYTPNYVARNLRAGATKTIGFLAPSYLGSLGIFLNRFISIAKKYNYSVTLFFTDGDQQKEIDALNQLKYKQLDGLFLLTRTNEWSVIEPYSAYGPLATWHRIDSPNIYSSYIDHYSGYYRSLEYLQQQGYQKIGHVLGNPENLNTHARKRAMKDFYENTQAPWQTEWLINDQYTNHSGRKIAHYWQQLTDKPEALAFYNDHVAAEFISELENLNYAVPRDVAVIGFDNSYVSELMHITTVDYAIQYQAENSFIYLYNQLNQTNIPEKKLTVRLVERRTVPKKDPADQSL
Firmicutes	Bacillales	769	7452	ExuR	RBAM_012400	A7Z3M7_BACA2	U		Bacillus amyloliquefaciens FZB42	326423	Galacturonate utilization, Glucuronate utilization	Galacturonate, Glucuronate	MVTIKDIAKLANVSHTTVSRALNGSPYIKEHTKQKILELASQLNYTPNVNAKSLAMQKSHTIGLFFTSITNGTSHSFFSDTIKGVNRTISEEYNLFVRAIDDLKSFETITPMRYDGIILMSQSDSDNSFIYHIREKNIPLVVLNRDIDDRSITNILSNDKEGSRQAVDCLIANGHRDIAIIEGKEGFRSTSQRKEGYLTSLIDHSIPIKHEYSVKGRYDMESGSQAMEKLLALQSPPTAVFCSNDDMAIGAMNAIFAKGLNVPEDISVIGFDDIGISQYMTPRLSTVKRPVENISILGAEKILALIADPDTAAEKIYENTEVMIRDSIKKLT
Firmicutes	Bacillales	769	7454	ExuR	BLi03514	Q65F23_BACLD	U		Bacillus licheniformis DSM 13	279010	Galacturonate utilization, Glucuronate utilization	Galacturonate, Glucuronate	MSVTIKDIARLANVSHTTVSRALNNSPLIKENTKKKILDIAAEMNYKPNFNAKSLVTQKSFTIGLFLTSLTDGTSSSFFADILRGVNKVIDENYNMVVRGIDDYHDLSSIHRNRYDGMILISQSEQDQAFIEHVLKQNIPVVVLNRKIEGHSVVNILANEHEGAFLAASYLIKNGHKQIAMVQGKEGFKSSQERKGGFLRALRDSNLDMPGEYLVQGDYTMQSGFRAAETLLKLKNPPTALFCANDDMAIGAMNALYANGKRCPDNMSIIGFDDSGFSAYTTPSLTTVKKPTEKISMLGAESLLSLIENPQAEGGQTLISTELIIRNSVKHL
Firmicutes	Bacillales	769	7453	ExuR	BPUM_2986	A8FHC3_BACP2	U		Bacillus pumilus SAFR-032	315750	Galacturonate utilization, Glucuronate utilization	Galacturonate, Glucuronate	MTVTIKDIAKLANVSHTTVSRALNNSPFIKEKTKQKILSIAKQLNYSPNVHARGLVSQKSFTIGLFFTSLTEGTSSSFFVDALKGVNSVMTEHYNLFVRGIDDFHDYTTIHKQRYDGILLMSQSEHDEAFIHHVKKQGIPIIVLNRRVESHEVMNILADDSQGAYQAAHYFIQQGHQQIAIIEGKEGFKSTQERKAGFLQALIDHHIPMKKEYMIKGDYHMKSGYESMESLLTLDHPPTALFCSNDDMAIGAMNALYAKGKTCPGDVSIIGFDDIAFSSYTTPALTTVKKPIEKMCALGADAILSVINGEEQEEDHMEKMYVHTELMIRDSVKKVQ
Firmicutes	Bacillales	769	7451	ExuR	BSU12370	EXUR_BACSU	R	*	Bacillus subtilis subsp. subtilis str. 168	224308	Galacturonate utilization, Glucuronate utilization	Galacturonate, Glucuronate	MVTIKDIAKLANVSHTTVSRALNNSPYIKEHTKKKILELAEQLNYTPNVNAKSLAMQKSHTIGLFFTSITNGTSHSFFADTIKGVNQAISEDYNLYVRGIDDLKNYDSVTPMRYDGIILMSQSDIDNSFIYHIREKNIPLVVLNRDIDDRTITNILSNDKEGSQEAVEYFIQSGHQDIAIIEGIEGFKSSQQRKEGYLSALIQHHIPIKHEYSVKGQYDMESGFQAMERLLALPNPPTAVFCSNDDMAIGAMNAIFAKGLRVPDDISVIGFDDIGFSQYITPRLSTVKRPVEKISVLGAQKLLSLISEPETKAEKILENTEFMVRDSVRRLTT
Firmicutes	Clostridia-1	5357	52554	ExuR	CAC0693	Q97L69_CLOAB	U	*	Clostridium acetobutylicum ATCC 824	272562	Galacturonate utilization	Galacturonate	MSVTIKDIAKIANVSHTTVSRALNNSPVINEETKRKILEIAKKLNYVPNFNAKSLVLNKSYNIGLFFSSISKGTSPSFFHEVVEGVNSIIEESYNLVIKGIDNCNDFNYISKKRFDGIILVSQSESDNSFIYDVINKEIPIVVLNREIEEQNVINIIAAEKDGAYKAAEYLIKNGHSKIAIIEGKAGFKSSVYRKMGFINALIDNNIEIKNEYFQAGNYDVESGFSAMKKFLKLKDRPTAVFCSNDDMAVGAVKAIELEGLRVPDDISLVGFDGSIFCEYVTPAITTIRKPSREIGIVGANKMLDVIDETEFNKKKIYIGTELIVRDSVKNLSK
Firmicutes	Clostridia-1	5357	52555	ExuR	Cbei_1831	A6LUH2_CLOB8	U		Clostridium beijerincki NCIMB 8052	290402	Galacturonate utilization	Galacturonate	MIIVDGEKSLLNKECKENMSVTIKDIAKLANVSHTTVSRALNNSPYINEETKVKIIALAKELNYVPNYSAKSLVLLKSYVIGVFFSSISEGTSDTFFHEIIRGVNNVIDKEYNLVVRGIDDYQYSHLIDNRNFDGIIVVSQSKNDDEFIQTILEKNIPTVVINRYIENEGLVNIMSDDTKGVYDAVTYFIENDHRKIALLQGNKEFESTVYRKRGYIRALEDNNIPINEEYILSGRYDLKSGYENMKKLLKLENVPTAVFCANDDIGVGAMKAIFEAGLKVPEDISIIGFDDSNFCNYVTPPLTSVRKDSLAMSEYGGRNLLNLIKNKEVDKEKVYIQSQLVVRKSVKKL
Firmicutes	Clostridia-1	5357	52550	ExuR	CBY_3741	B1R0J0_CLOBU	U		Clostridium butyricum 5521	447214	Galacturonate utilization	Galacturonate	MSVTIKDIAKLANVSHTTVSRALNNSPYINEETKAKIKALAKELNYVPNYNAKSLVLLKSYVIGVFFSSISEGTSDTFFHEIVKGVNKVMDKEYNLVIRGIDNYEHSHPIDNKNFDGIIVVSQSKNDDEFIKTIIEKNIPMVVINRDISVDGVINILSNDTKGSYDAVQYLINNNHKKIGMIQGNLEFESSTYRKKGYIMALEENNINVNNDYILSGKYTLESGYHNMKKLLNLEDKPTAVFCANDDIAVGAMKAIFESGLRVPDDISIIGFDNSNFCNYVTPTLTSVKKDSLTMSEIGGINLLDIINKKLINQEKIFIESYLVERNSVKRI
Firmicutes	Lactobacillaceae	4733	46887	ExuR	LVIS_0147	Q03U05_LACBA	U		Lactobacillus brevis ATCC 367	387344	Galacturonate utilization, Glucuronate utilization	Galacturonate, Glucuronate	MTEVTIRTIAQRANVSHTTVSRALNDSPLVKEETKRKIRQLADELGYVPNLNAKGLVENRSFLIGIFFSELDTGTSPSFLVDVINRAKVALPAGYSLSLDSIESLSKSSGISRHQYDGAIVVSQSRHDDAFIEMLIKQGLPVVVLNREIDRQDVPNFATNDYLGTEKILEYAIRMGHQTFGIIQGATDFVSAADRQQAFEDVVRTHQVTVKPEWRKRGTYLPDSGYEAMRAILGASTVPTCIFAANDDMAVGAMRACQDLGYSIPGDISIIGYDDMSYAKYLIPRLTTVRKPTDSIVKDGVAALTQLLDDSAEKVTKKIIVPTLIVRDSVKDLRN
Firmicutes	Lactobacillaceae	4733	46896	ExuR	LSA0130	Q38ZF0_LACSS	U	*	Lactobacillus sakei subsp. sakei 23K	314315	Galacturonate utilization, Glucuronate utilization	Galacturonate, Glucuronate	MKKADKTTVTIRTIAQLANVSHMTVSRALNDSELVKPATKEKILAIAKEIGYVPNINAKSLVTNRSYMIGIFFTNLETGTSNSFMTDVVAQAQAVLPKSYSLSINSVAKAMAGQYISINNYDGIIVISQSKSDYDFIEYVHNLGLPLVVLNRVIERDDINNYAIGDRLGGELATNYAIQMGHRKLALIRGIDSFESSVQRTNGFMQAVEANGIAVDPTLIKVGDYRPESGHELMREILASGNIPSCVICENDDMAVGAISACVELGYQIPRDISFIGFDDMAYAKFITPSLTTIKKPTAQIIEMGVAKLMAIVEGEQSDVEQKIVDPEMVIRQSVVNLYQH
Proteobacteria/Gamma	/Aeromonadales	2237	20681	FruR	Tola_0289	C4L8P9_TOLAT	U		Tolumonas auensis DSM 9187	595494	Fructose utilization	Fructose-1,6-diphosphate, Fructose-1-phosphate	MKLEEIARLAGVSRTTASYVVNGKAEQHRISEKTRERVMAVVNQYNYKPDQAATALRLGSSRLFGFILPDLENTSYARLAKLLEAGARAHGFQLIITCSDDNPETEKALAEMLTSRRIDALLVSTVLEPYNDFYPRLQQKGLPVIAIDRALDDEKFASVISEDLDGAIRLTNSLLSPLPASIGLLGAVPDLGISHERERGFRAALRSADITGEPLIAYGEHFSRSEGARICADWIARGVMPEALVTTSYVLLEGVLNTLQEHPELMKNLRLATFGDNQLLDFLPVKVNALPQQFSLIAERALALALAATEHNYTPGVEVIPRRLKVRSHTG
Proteobacteria/Gamma	Enterobacteriales	1135	10352	FruR	CKO_03297	A8ALL8_CITK8	U		Citrobacter koseri ATCC BAA-895	290338	Central carbohydrate metabolism	Fructose-1,6-diphosphate, Fructose-1-phosphate	MPSQWLWFVHFTQGAIVKLDEIARLAGVSRTTASYVINGKAKQYRVSDKTVEKVMAVVREHNYHPNAVAAGLRAGRTRSIGLVIPDLENTSYTRIANYLERQARQRGYQLLIACSEDQPDNEMRCIEHLLQRQVDAIIVSTSLPPEHPFYQRWANGSFPIVALDRALDREHFTSVVGADQDDAEMLAAELRKFPAETVLYLGALPELSVSFLREQGFRTAWKDDPREVHYLYANSYEREAAAQLFEKWLETHPMPQALFTTSFALLQGVMDVTLRRDGKLPSNLAIATFGDNELLDFLQCPVLAVAQRHRDVAERVLEIVLASLDEPRKPKPGLTRIKRNLYRRGILSRS
Proteobacteria/Gamma	Enterobacteriales	1135	10353	FruR	ETAE_0627	D0ZC73_EDWTE	U		Edwardsiella tarda EIB202	498217	Central carbohydrate metabolism	Fructose-1,6-diphosphate, Fructose-1-phosphate	MKLDEIARLAGVSRTTASYVINGKAKQYRVSDKTVEKVMAVVREHNYHPNAVAAGLRAGRTRSIGLVIPDLENTSYTRIANYLERQARQRGYQLLIACSEDQPDNEMRCIEHLLQRQVDAIIVSTALPPEHPFYQRWANDPLPIIALDRALDPEHFISVVGADMDDAEMLAAELRRFPAQSVLYLGALPELSVSFLREQGFRKAWQGDERPVNYLYTNSYEREAAGAAFSQWLQHNEMPQALFTTSFPLLQGVLDVTLKKHGHLPSDLAIATFGDNELLDFLDCPVLSVGQRHRDIAERVLELVLASLDEPRKPKPGLSRMRRILLQRGRLNRQ
Proteobacteria/Gamma	Enterobacteriales	1135	10354	FruR	Ent638_0626	A4W6I3_ENT38	U		Enterobacter sp. 638	399742	Central carbohydrate metabolism	Fructose-1,6-diphosphate, Fructose-1-phosphate	MKLDEIARLAGVSRTTASYVINGKAKQYRVSDKTVEKVMAVVREHNYHPNAVAAGLRAGRTRSIGLVIPDLENTSYTRIANYLERQARQRGYQLLIACSEDQPDNEMRCIEHLLQRQVDAIIVSTSLPPEHPFYQRWANDSFPIVALDRALDREHFTSVVGADQDDAEMLAAELRTFPAETVLYLGALPELSVSFLREQGFRTAWKDDPREVHYLYANSYEREAAAQLFEKWLETHPMPQALFTTSFALLQGVMDVTLRREGKLPTELAIATFGDNELLDFLQCPVLAVAQRHRDVAERVLEIVLASLDEPRKPKPGLTRIKRNLYRRGVLSRH
Proteobacteria/Gamma	Enterobacteriales	1135	10355	FruR	EAM_0687	D4IFY2_ERWAE	U		Erwinia amylovora ATCC 49946	716540	Central carbohydrate metabolism	Fructose-1,6-diphosphate, Fructose-1-phosphate	MKLDEIARLAGVSRTTASYVINGKARQYRVSDKTVEKVMAVVREHNYHPNAVAAGLRAGRTRSIGLVIPDLENTSYTRIANYLERQARQRGYQLLIACSEDQPDNEMRCVEHLLQRQVDAIIVSTSLPPEHPFYQRWINDPLPIIALDRALDREHFTSVVGADQEDAQALAAELRKLPAKSVLFMGALPELSVSFLRELGFRDAWKGDERQPDFIYANSFERSAAAALFENYLATHDMPEALFTTSFGLLQGVMDVTLRREGRLPQNLAIATFGDHELLDFLECPVLSVGQKHRDVAERVLELVLASLDEPRKPKVGLTRIRRNLYRRGRLNRKTN
Proteobacteria/Gamma	Enterobacteriales	1135	10356	FruR	ECA3827	Q6D0H2_PECAS	U		Erwinia carotovora subsp. atroseptica SCRI1043	218491	Central carbohydrate metabolism	Fructose-1,6-diphosphate, Fructose-1-phosphate	MKLDEIARLAGVSRTTASYVINGKAKQYRVSDKTVEKVMAVVREHNYHPNAVAAGLRAGRTRSIGLVIPDLENTSYTRIANYLERQARQRGYQLLIACSEDQPDNEMRCIEHLLQRQVDAIIVSTALPPEHPFYQRWINGGLPIIALDRALDREHFTSVVGADLEDAEMLAQELRKMPAKSVLYLGALPELSVSFLREQGFRQAWAGDPREVNYLYSNSYERVASAAAFMDYLQNNPMPEALFTTSFPLLQGVMDVNLKINGRLPNNLAIATFGDNELLDYLECPVLSVAQRHREVAERVLELVLASLDEPKRPKPGLNRIRRNLYRRGSLSRM
Proteobacteria/Gamma	Enterobacteriales	1135	10357	FruR	b0080	U6N7L5_ECOLI	U	*	Escherichia coli str. K-12 substr. MG1655	511145	Central carbohydrate metabolism	Fructose-1,6-diphosphate, Fructose-1-phosphate	MKLDEIARLAGVSRTTASYVINGKAKQYRVSDKTVEKVMAVVREHNYHPNAVAAGLRAGRTRSIGLVIPDLENTSYTRIANYLERQARQRGYQLLIACSEDQPDNEMRCIEHLLQRQVDAIIVSTSLPPEHPFYQRWANDPFPIVALDRALDREHFTSVVGADQDDAEMLAEELRKFPAETVLYLGALPELSVSFLREQGFRTAWKDDPREVHFLYANSYEREAAAQLFEKWLETHPMPQALFTTSFALLQGVMDVTLRRDGKLPSDLAIATFGDNELLDFLQCPVLAVAQRHRDVAERVLEIVLASLDEPRKPKPGLTRIKRNLYRRGVLSRS
Proteobacteria/Gamma	Enterobacteriales	1135	10358	FruR	KPN_00084	A6T4M3_KLEP7	U		Klebsiella pneumoniae subsp. pneumoniae MGH 78578	272620	Central carbohydrate metabolism	Fructose-1,6-diphosphate, Fructose-1-phosphate	MKLDEIARLAGVSRTTASYVINGKAKQYRVSDKTVEKVMAVVREHNYHPNAVAAGLRAGRTRSIGLVIPDLENTSYTRIANYLERQARQRGYQLLIACSEDQPDNEMRCIEHLLQRQVDAIIVSTSLPPEHPFYQRWANDPFPIVALDRALDREHFTSVVGADQDDAEMLAAELRTFPGETVLYLGALPELSVSFLREQGFRKAWQDDPREVHYLYANSYEREAAAQLFEKWLETHPMPQALFTTSFPLLQGVMDVTLRREGKLPSELAIATFGDNELLDFLQCPVLAVAQRHRDVAERVLEIVLASLDEPRKPKPGLSRIRRNLYRRGSLNRR
Proteobacteria/Gamma	Enterobacteriales	1135	10359	FruR	plu3664	Q7N137_PHOLL	U		Photorhabdus luminescens subsp. laumondii TTO1	243265	Central carbohydrate metabolism	Fructose-1,6-diphosphate, Fructose-1-phosphate	MKLDEIARLAGVSRTTASYVINGKAKQYRVSDKTVEKVMAVVREHNYHPNAVAAGLRAGRTRSIGLVIPDLENTSYTRIANYLERQARQRGYQLLIACSEDQPENEMRCVEHLLQRQVDAIIVSTALPPEHPFYQRWASRSLPIIALDRALENEHFISVVGDDFEDAKMLAQEFRQFPAESVLYLGALPELSVSFLREQGFREAWKDDPRKVMYLYSNSYERDAAAEVFTKWLETHPMPQALFTTSFALLQGVMDVTLKHSGRLPNQLVIATFGDHELLDFLECPVLSVAQRHREIAERVLELVLASLDEKQKPGPGITRIHRDLCRRGSLSRKI
Proteobacteria/Gamma	Enterobacteriales	1135	10360	FruR	PMI2080	B4F121_PROMH	U		Proteus mirabilis HI4320	529507	Central carbohydrate metabolism	Fructose-1,6-diphosphate, Fructose-1-phosphate	MKLDEIARLAGVSRTTASYVINGKAKQYRVSDKTVEKVMAVVREHNYHPNAVAAGLRAGRTRSIGLVIPDLENTSYTRIANYLERQARQRGYQLLIACSEDQPDNEIRCVEHLLQRQVDAIIVSTALPPEHPFYQRWANRSLPIIALDRALESEHFISVVGDDLEDAKMLASELKAFPSQSVLYLGALPELSVSFLREQGFRSVWQDDPRQVTYLYANSYEREAAAEVFSEWLNNNPMPDALFTTSFALLQGVMDVTLQRSGRLPTQLVIATFGDHELLDFLECPVLSVAQRHRDIAQRVLELVLASLEEEQKPQAGITRIRRDLCRRGSLGRTR
Proteobacteria/Gamma	Enterobacteriales	1135	10361	FruR	STM0118	CRA_SALTY	R		Salmonella typhimurium LT2	99287	Central carbohydrate metabolism	Fructose-1,6-diphosphate, Fructose-1-phosphate	MKLDEIARLAGVSRTTASYVINGKAKQYRVSDKTVEKVMAVVREHNYHPNAVAAGLRAGRTRSIGLVIPDLENTSYTRIANYLERQARQRGYQLLIACSEDQPDNEMRCIEHLLQRQVDAIIVSTSLPPEHPFYQRWANDPFPIVALDRALDREHFTSVVGADQDDAEMLAEELRKFPAETVLYLGALPELSVSFLREQGFRTAWKDDPREVNFLYANSYEREAAAQLFEKWLETHPMPQALFTTSFALLQGVMDVTLRRDGKLPSDLAIATFGDHELLDFLQCPVLAVAQRHRDVAERVLEIVLASLDEPRKPKPGLTRIRRNLYRRGILSRS
Proteobacteria/Gamma	Enterobacteriales	1135	10362	FruR	Spro_0750	A8G9R6_SERP5	U		Serratia proteamaculans 568	399741	Central carbohydrate metabolism	Fructose-1,6-diphosphate, Fructose-1-phosphate	MKLDEIARLAGVSRTTASYVINGKAKQYRVSDKTVEKVMAVVREHNYHPNAVAAGLRAGRTRSIGLVIPDLENTSYTRIANYLERQARQRGYQLLIACSEDQPDNEMRCIEHLLQRQVDALIVSTALPPEHPFYQRWANDPLPIIALDRALDREHFISVVGADQEDSFALAQELRTFPAESVLYLGALPELSVSFLREQGFREAWQDDERPVDYLYANSYEREAAGVLFAEWLKTHPMPQALFTTSFSLLQGVMDVTLKQRGRLPTDLAIATFGDHELLDFLECPVLAVAQRHRDVAERVLELVLASLDEPRKPKPGLTRIRRNLFRRGSLSRK
Proteobacteria/Gamma	Enterobacteriales	1135	10363	FruR	y3637	Q7CGA6_YERPE	U		Yersinia pestis KIM	187410	Central carbohydrate metabolism	Fructose-1,6-diphosphate, Fructose-1-phosphate	MKLDEIARLAGVSRTTASYVINGKAKQYRVSDKTVDKVMAVVREHNYHPNAVAAGLRAGRTRSIGLVIPDLENTSYTRIANYLERQARQRGYQLLIACSEDQPDNEMRCVEHLLQRQVDAIIVSTALPPEHPFYQRWAKDPFPIIALDRALDREHFISVVGADQEDAQMLAQELRSFPAESVLYLGALPELSVSFLREMGFREAWKDDPRKVEYLYANSYEREAAGVLFAEWLKTHPMPQALFTTSFQLLQGVMDVTLKQSGRLPCNLAIATFGDNELLDFLECPVLAVAQRHRDVAERVLELVLASLDEPHKPKPGLTRIRRNLFRRGTLSLSRR
Actinobacteria	Micrococcineae	5456	53377	FruR	CMM_2841	A5CUY8_CLAM3	U	*	Clavibacter michiganensis subsp. michiganensis NCPPB 382	443906	Fructose utilization	Fructose	MTPLSSPPGSPPDPPSGARRPTMKHVARLAGVGIKTVSRVVNGEPNVSAEMTARVQAAVEQLQYQPDLHAGNLRRADRRTNTLGLLVGSVANPFSGAVHRAVEEVAKERQVAVFASSLDDDPERERSSVDAFLARRVDGLILTTIAPSQAYLGVAASRGTPLVFVDRVPAGLEADSVIVDNAAGISRAVAHLADQGHRRIAFLGDRPEIFTARERERGFVEEMQRRGLPVAPELVLDGAWDERVAEALAERLLALPEPPTAIVSGQNLITIGVITALRRHDAHRSIALVGFDDLPLAALLDPAVTVIAQDPSGIGHAAAERVFARLDGDAGPAQTVVVPTTLIVRGSGEVPRHA
Actinobacteria	Micrococcineae	5456	53378	FruR	JNB_11229	A3TIS9_9MICO	U		Janibacter sp. HTCC2649	313589	Fructose utilization	Fructose	MSDHGGRATMRDVAALAGVSIKTVSRVVNDEPAVADAVRVRVQDAVARLDYRHNLGASNLRRGKGRSGLIGALLQDVSNSFSAALLRSLEDAARDRGTAILAASLDEEPDRERSLVHDLVTRRVDGLVLMPSTDRQDYLASEVRAGLPVVFVDREPRGVAADSVTVENFEGAQMGVEHLLAQGHRRIACLTDLGEIYTARSRRDGFVEAFRARGKHPDEELMVSGLRGPGAAEAAVTHLLDLARPPTAIFAGRNDLTQGAVRALRQRGLSESVALVGFDDFPLADLVTPALTVIRQDVGRIGRLTADLLMARIDGDTSAPQRIIIEPTLVVRGSGEIAPPA
Proteobacteria/Gamma	Oceanospirillales/Alteromonadales	2238	20691	FruR	Csal_2649	Q1QU62_CHRSD	U	*	Chromohalobacter salexigens DSM 3043	290398	Fructose utilization	Fructose-1,6-diphosphate, Fructose-1-phosphate	MTLAEIARLAGVSRTTASYVINGQAAERRIRPETVAHVMAVVAKYDYRIDAQAAALRRGASRTLGFIVPDLENTSYARLAKRLENGARRQGYQLLIAGSDDDPDTERELARALRAQRCDALIVASSLAMDDPFYLDLMAGGLPVIALDRALDPERFVCVVSNNHQAAGALTRSVIDDDVTRIAWLDAVPELSISVERRAGFLDTTREARLDAPLLLSGARYDRATGAALMRRLIDEHGVPDALVTASYVLLDGVFDVLLEQGGLPERLRLATFGDDRLLDFLPLAVNSLPQHHDRIAELALTRAMQAASGDYRPGIDIVERSLHDRRSLKRMHAPTP
Proteobacteria/Gamma	Oceanospirillales/Alteromonadales	2238	20692	FruR	MED297_11620	A4BB49_9GAMM	U		Reinekea sp. MED297	314283	Fructose utilization	Fructose-1,6-diphosphate, Fructose-1-phosphate	MKIADIARLAGVSKATVSSVLNGKAEQYRISQKTQEKVFKVVREHDYQPNHSAASLRSGKSHSIGLIVPDFENRSYLRIAKRLEALARAEGYQLIIASSDDQPETELESARTLVSRGVDALLVSTSLTDSSDYLSILNRGTPVIAIDRGLSDQFSNVISDDYQGALQLTNALPLANLNSVVLIGALPQLSVSQERERGFRAAVSGQTRLIPSIYYGERFDLESGMAQFRNAIADHDGLPDAVITTSYALMEGVIEVLQSDFREALFQSPVCALGTFGNSRLLDFLPMPVVSLPQQYEQIAEAAWSLARQAIESSYQPQKVIIRRKLNRRGVA
Proteobacteria/Gamma	Pasteurellales	2235	20659	FruR	NT05HA_0897	C6AN62_AGGAN	U		Aggregatibacter aphrophilus NJ8700	634176	Fructose utilization	Fructose-1,6-diphosphate, Fructose-1-phosphate	MKLDELAKLAGVSCTTVSYVVNGKAKQYRVSDSTIEKVEALIKQYDFKPNAMAASLRVGKSKTIGLIIPDFENISYAKIANNLENRLREKGYQLLISCSNDKVQNEQDCVKHLLQRQIDALVVSSTLPYDTDFYQNIEIPVVGFDRRIMSPNVVNVLTDDEGDAYRLSNELLQQAEQQRILFFGALPELPTSQEREKGFRKALEGKDIPVTYLYTDKFHKDNAAADFARWLDQNELPTTIFTTSFTLLEGVLLVLLQRQGHVPHDLIIATFGHFEMLELLENPVICSVQDYDKVSQSLLNLAFDAISKKHKNTVNTTPLMRKTVKYHCSR
Proteobacteria/Gamma	Pasteurellales	2235	20661	FruR	MS1317	Q65SY6_MANSM	U	*	Mannheimia succiniciproducens MBEL55E	221988	Fructose utilization	Fructose-1,6-diphosphate, Fructose-1-phosphate	MKLEELAKLAGVSRTTASYVVNGKAKQYRVSDKTIEKVQALIKEYDFKPNAMAAGLRAGKSNTIGLIIPDFENLSYAKIANQLEKSCRENGYQLLITCSNDNVANELECAKHLFQRQVDALFVSTVLPADNHYYQQNNAIPIIGFDRHIDSEGVDNVLTDDKHDAYELAVSLFDKADYQRILFLGALPELPMSKAREEGFKQALGKKQVQVDYLYASQFRKENAEQLVSEWIEKNGIVPDAIFSTSLTLLQGLLMSFIKRNEAFPKDLVIATFGWHEMLELLENKIVCSVQDHSKVVQALLDLALHKMRIKKLKQPHPVIQRRLAYHNWQ
Proteobacteria/Gamma	Pseudomonadaceae	2239	20701	FruR	Avin_12180	C1DPZ3_AZOVD	U		Azotobacter vinelandii AvOP	322710	Fructose utilization	Fructose-1,6-diphosphate, Fructose-1-phosphate	MKLSDIARLAQVSVTTASYVINGQAAQRRISPATVERVLAVVERYGYLPDQQAAGLRRGQSRCLGFILPDLENPSYARLAKLLEQGARAVGYQLLIASSDDDPASERQLLELFRSRRCDALIVASCLPQDDPLYRNLVEGGLPVIAVDRALDAAHIRSVVSDDQLAGAQLTASLLDPPPRHIALIDAYSALPISQARERGFHQALEGFEGIVSVHHAEQFSRACGCRQMRELLNGADRPDALVTTSYVLLEGVFEALRDYPAETFADLRLATFGDAQLLDFVPLRVNTIAQQYDRIAERVLERTLRAIEGDYQPGIEAIPRTLKVRRGQA
Proteobacteria/Gamma	Pseudomonadaceae	2239	20694	FruR	PA3563	Q9HY54_PSEAE	U	*	Pseudomonas aeruginosa PAO1	208964	Fructose utilization	Fructose-1,6-diphosphate, Fructose-1-phosphate	MKLSDIARLAGVSVTTASYVINGKAAQRRISAATVERVLAVVEEHGYQPDQQAAGLRRGQTRTLGFILPDLENPSYARLAKQLEQGARARGYQLLIACSDDEPETERQVVNLFRARRCDALIVASCLPAGDDTHARLVAEGLPVVAIDRQLDPQRFASVISDDQDAARRLTETLLQPAPRHIALLGARADLIISHDRAAGFRQALKDFRGEVIVEHAEVFSRECGRRLMEQLLERLGYLPDALVTTAYVLLEGVFDVFQARADGWPEGLRVATFGDTQLLDFVPLKVNSIYQQHALIAANALELALRAVEENDYRPGLHAVPRQLKLRD
Proteobacteria/Gamma	Pseudomonadaceae	2239	20695	FruR	PSEEN0931	Q1IER8_PSEE4	U		Pseudomonas entomophila L48	384676	Fructose utilization	Fructose-1,6-diphosphate, Fructose-1-phosphate	MKLSDIARLAGVSVTTASYVINGKAEQQRISNSTVERVRAVVEAHGFTPNPQAAGLRSRHTRTLGFILPDLENPSYARIAKQLEQGARARGYQLLIASSDDQPDSERQLQQLFRARRCDALFVASCLPAEDDSYRELQAKGLPVIAIDRRLDPAHFCSVISDDRDASRQLAQSLLKTQPRSIALIGARPELSVSQARAGGFDEALQGFAGDVRRYQGEAFSRECGQRLMQQLIDELGGLPDALVTTSYVLLQGVFDTLQARPADSRQLQLGTFGDNQLLDFLPLPVNAMAQQHGLIAATALELALAAIEDKRYEPGVHAIGRTFKQRIALA
Proteobacteria/Gamma	Pseudomonadaceae	2239	20698	FruR	PFL_0858	Q4KIE3_PSEF5	U		Pseudomonas fluorescens Pf-5	220664	Fructose utilization	Fructose-1,6-diphosphate, Fructose-1-phosphate	MKLSDIARLAGVSVTTASYVINGKAEQQRISNATVERVRAVVEEHGFTPNPQAAGLRSRHTRTLGFILPDLENPSYARIAKLLEQGARARGYQLLIASSDDAPDSERQLLQLFRARRCDALFVASCLPPEDDSYQQLQAQGLPIIAIDRVMPPELFCSVISDDLQASLHLTQSLLEPEPKQIVLIGARPELSISQERAAGFRQALEGFGGEVLIEHGEAFSRDCGRQLMEELLQRLGHLPDALVTTSYVLLQGVFDALHDFPLKSRPLRLGTFGDTQLLDFLPLPVNAMAQQHQLIAEKALQLALAAIEEAHYQPGVQAIARTFKQRIQQG
Proteobacteria/Gamma	Pseudomonadaceae	2239	20699	FruR	Pmen_0785	A4XQD7_PSEMY	U		Pseudomonas mendocina ymp	399739	Fructose utilization	Fructose-1,6-diphosphate, Fructose-1-phosphate	MKLSDIARLAQVSVTTASYVINGQAERRRISPATVERVLAVVQEHGYRPDQQAASLRRGQSRCLGFILPDLENPSYARLAKLLEQKARAAGYQLLIASSDDDPDSERQLLELFRSRRCEALIVASCLPADDPLYPELVASGLPVVAVDRALSPQHIRSVVSDDEQAGRRLTESLLQPAPRHIALLGARPQLVISQARERGFRAALAGFDGRVSVYHGELFNRASGHRQMRALLAEAGPPDALLTTAYVLLEGVFDALREQGGASWPAVRLATFGDTQLLDFLPVRVNAMSQQHERIAERVLAWTLQAVEQDDYQPGIEAIERSFKARPQR
Proteobacteria/Gamma	Pseudomonadaceae	2239	20696	FruR	PP0792	Q88PQ6_PSEPK	U		Pseudomonas putida KT2440	160488	Fructose utilization	Fructose-1,6-diphosphate, Fructose-1-phosphate	MKLSDIARLAGVSVTTASYVINGKAEQQRISNSTVERVRAVVEAHGFTPNPQAAGLRSRHTRTLGFILPDLENPSYARIAKQLEQGARARGYQLLIASSDDQPDSERQLQQLFRARRCDALFVASCLPPEDDSYRELQDKGLPVIAIDRRLDPAHFCSVISDDRDASRQLAASLLSSAPRSIALIGARPELSVSQARAGGFDEALQGYTGEVRRYQGEAFSRECGQRLMQQLIDDLGGLPDALVTTSYVLLQGVFDTLQARPVDSRQLQLGTFGDNQLLDFLPLPVNAMAQQHGQIAATALELALAAIEEKRYEPGVHAVGRTFKQRISVA
Proteobacteria/Gamma	Pseudomonadaceae	2239	20700	FruR	PST_0987	A4VI83_PSEU5	U		Pseudomonas stutzeri A1501	379731	Fructose utilization	Fructose-1,6-diphosphate, Fructose-1-phosphate	MKLTDIARLANVSVTTASYVLNGKAAQRRISPATVERVLAVAEQQGFQLDQQAAGLRRGQSRTLGFIVPDLENPSYARLAKLLEQRARQRGYQLLIAGTDDEPDTERQVIQVLRSRRCDALIVASCLPADDAGYRKVQATGTPVIALDRALDAEHFCSVVSDDREAGAQLTRSLHVPPEAHVALISARPALRISQQREEGFQQALAQHRGPVSILRAEQFSRACGRAQMLALLDRGPLPDALITTAYVLLEGVFDALRERNLLWPEQLRLGTFGDAQLLDFLPIRVNAISQQHAQIAEQVLEQAIRAIEQGDYRPGVIAIERELKVRRG
Proteobacteria/Gamma	Pseudomonadaceae	2239	20697	FruR	PSPTO0953	Q888R3_PSESM	U		Pseudomonas syringae pv. tomato str. DC3000	223283	Fructose utilization	Fructose-1,6-diphosphate, Fructose-1-phosphate	MKLSDIARLAGVSVTTASYVINGKAEQQRISPATVERVKAVVEQYDFRPNPQAAGLRSRHSKTLGFILPDLENPSYARIAKLLEQGARSLGYQLLIASSDDDPVSELQLLQLFRARRCDALLVASCLPPSDASYRDLQLKGMPIIAIDREMDPNFFCSVVSDDHDASLQLTRSLLQTQPRHIALIGARPELSISRARAAGFEHALDGFAGTTIVEHGEAFSRQCGQRLMSEMLQRQGHFPDALITTSYVLLQGVFDVLQSQSLNTTSLHLGTFGDTQLLDFLPLPVNAMAQQHQLIADKALQLALAAIEKDDYQPGVHAIARAFKQRIHGV
Proteobacteria/Gamma	Psychromonadaceae/Aeromonadales	2237	20679	FruR	AHA_2349	A0KKS1_AERHH	U	*	Aeromonas hydrophila subsp. hydrophila ATCC 7966	380703	Fructose utilization	Fructose-1,6-diphosphate, Fructose-1-phosphate	MKLDEIAALAGVSRTTASYVINGKADQYRISQATRDKVMAVVTAHNYQPDSRAASLRGGQTKTLGFILPDLENASYAKLAKRLEQGARVQGYQLLIVCSEDDPATEKELAEMLASRHVDALLVASCLPPEDPFYLGLQTRGIQVLAIDRAMAADKFVTVASENQKASCDLTASLLSPAIKHIALITALPALTISRERKAGFEQAVASHSTACHLCEGAHFSRAEGYRLIKTLHQQLGQLPQALVATSYILMEGVLDYLLEQETDMSRLAMATFGDDRLLDFLPFGINSLPQQHDALASQALELALKAIGGEYQCGLHYVSRTLKRRR
Proteobacteria/Gamma	Psychromonadaceae/Aeromonadales	2237	20680	FruR	ASA_1938	A4SM89_AERS4	U		Aeromonas salmonicida subsp. salmonicida A449	382245	Fructose utilization	Fructose-1,6-diphosphate, Fructose-1-phosphate	MMKLDEIAALAGVSRTTASYVINGKADQCRISQATRDKVMAVVTAHNYQPDSRAASLRGGQTKTLGFILPDLENASYAKLAKRLEQGARAQGYQLLIVCSEDEPATEKELAEMLASRHVDALLVASCLPPDDPFYPRQQARGIHVLAIDRAMAVDKFVTVASENQKASFDLTASLLTPALKHIALITALPALTISQERKAGFEQAVASHTTARHLCEGAHFSRVEGYRLIKGLHQQLGQLPEALVATSYILMEGVLDYLLEQETDMSQLAMATFGDDRLLDFLPFGINSLPQQHDALASQALELALKAINGEYQCGLHYVSRTLKRRR
Proteobacteria/Gamma	Psychromonadaceae/Aeromonadales	2237	20678	FruR	PE36_02704	A6FGR3_9GAMM	U		Moritella sp. PE36	58051	Fructose utilization	Fructose-1,6-diphosphate, Fructose-1-phosphate	MTLDEIAKLAGVSRTTASYVINGKASKYRISEKTQKKVMAVVNEHNYRPDHAAQSLRGGSNRSLGLIIPDLENSSYAKLAKLLERDARKAGYQLIISCSDDDVDTEIKVAETLLSRRIDALLVASALPADHSYYRTVQANGVPVIGLDRAMDDEIFACVISEDLDGAYELTQALLQQDICSIGLVGAVPDLCISKEREQGFLAAIKQHGNPVKKLTAYGDHFSQEQGQAQVQQWIDNDTVPDAILATSYTLFEGVLDCLILNPSLMATTKLATFGDNRLLDFLPSKIQSLPQQFELIAEHALKMALNAVNGRNQPGVEVVSRKIIRR
Proteobacteria/Gamma	Psychromonadaceae/Aeromonadales	2237	20676	FruR	Ping_3550	A1T0G8_PSYIN	U		Psychromonas ingrahamii 37	357804	Fructose utilization	Fructose-1,6-diphosphate, Fructose-1-phosphate	MKLVEIARLAGVSRTTASYVINGKAEQYRISEKTRLKVMAVVDKYNYKPNYAASTLRVGNSRTFGLIIPDLENTSYAKIAKLLERDARKSGFQLIICGSGDDINTEMNVAENLVRRGIDVLIVATALPGDNEFYRNIQAKGVPVVAIDRCLDDECFSSVISEDLEGAYQLCEALLEKNINSIGLIGAGPLLGVSKERELGFKAALAQYSGSLNIQYAYGEDFSIEQGQYLAQQWIDQGCFPDAILITSYTLFVGVLDCLLAHPELQEKTELATFGDNRLLDFLPIKVQSLPQQLEVIAEKALQLALLAAQGTYNPSVEVVPRRLIKR
Proteobacteria/Gamma	Psychromonadaceae/Aeromonadales	2237	20677	FruR	PCNPT3_02230	M4U3J9_9GAMM	U		Psychromonas sp. CNPT3	314282	Fructose utilization	Fructose-1,6-diphosphate, Fructose-1-phosphate	MTLDKIAKLAGVSRTTASYVINGKASKYRISQKTQLKVMEIVKRYNFSVNPAARALRGGSNHLLGLIIPDLENNSYCKLAKLLERNARQAGYQLIICCSDDDMQTEMKVANTLLSRRIDALLVATSLPLDHAFYYDIQAKGVPIIGIDRALNDEVFASVISEDLEGSYALTQSLLSKNINSIGLVGAVRDLGISKEREQGFLAAIKQYQPNIQYSIAYGDHFSPEQGQAQLQSWARNNHFPDAIIATSYTLFEGVLDHLLLHPELMKRTKLATFGEHRLLDFLPSKIQSLEQKFELIAERALTLALQSIKTNVQPGIDVITRKIIRR
Proteobacteria/Gamma	Vibrionales	2234	20657	FruR	PBPRA1572	Q6LRU3_PHOPR	U		Photobacterium profundum SS9	298386	Fructose utilization	Fructose-1,6-diphosphate, Fructose-1-phosphate	MTLDEIAKLAGVSRTTASYVINGKASKYRISEKTQVKVMAVVNEHNFRPDHAATSLRAGSSRSFGLIIPDLENSSYAKLAKLLERNARKAGYQLIISCSDDDPDTEMKVAETLLSRRIDALLVASVLPADNDFYPRIQTGGVPVIALDRALDDEIFASVISEDLEGAFELTQTLLNKGVNSIGLVGAVPELGVSKEREQGFLTAIRRHQPDINMHIAYGDHFSQEQGQKQVQQWIDSEHFPDAILATSYTLFEGILDCLLANPELMSKIHLATFGDNRLLDFLPIKIQSLPQQFELIADNALELALNAAAGRYRTGVEVVPRKIKRR
Proteobacteria/Gamma	Vibrionales	2234	20656	FruR	VAS14_01976	Q1ZQ50_PHOAS	U		Vibrio angustum S14	314292	Fructose utilization	Fructose-1,6-diphosphate, Fructose-1-phosphate	MTLNEIAKLAGVSRTTASYIINGKAEQYRISEKTQQKVLEVVNAHNYRPNHAASSLRAGSSQSLGLIIPDLENTSYAKIAKLLELNARTAGYQVIISCSDDDPVTEVDVANLLLSRKLDALIVASALPADNEFYKTVQAKGTPVIAIDRALDDEYFASVISEDLEGAYALTNALLDQPISSIGLIGAVADLGVSIEREQGFQAAINNKLKTVNVSLAYGEQFSQQQGALIAQQWIDANCFPEAILATSYTLFEGVLDCLLKHPEVMERTYLATFGDNRLLDFLPNKIQSLPQQFDLIADHALRLALSAIQGDYQQGVEVVPRKVIRR
Proteobacteria/Gamma	Vibrionales	2234	20648	FruR	VCA0519	Q9KM69_VIBCH	U	*	Vibrio cholerae O1 biovar eltor str. N16961	243277	Fructose utilization	Fructose-1,6-diphosphate, Fructose-1-phosphate	MTLDEIAKLAGVSKTTASYVINGKAQKYRISEKTQHKVMAVVEQYNFRPDHAASALRAGNSRSFGLIIPDLENTSYARLAKLLEQNSRQAGYQILIACSDDDPQIEMAAAEALVSRRIDALFVASGIPSASEYYLKLQQSGTPVIAIDRALDDEYFSCVISEDFGAAFELTRSVLTQDVHSVGLVGALPELNVSREREQGFAMAVKQRGLPTTLGYGEHFNREEGRKVFAKWVANDQLPDAVVATSYTLLEGILDVLLEQPELMQKVRLATFGDNRLLDFLPIRVNSLPQQFELIADSALALALNASAKRYQTGIELIPRQLKVRT
Proteobacteria/Gamma	Vibrionales	2234	20654	FruR	VF_A0943	Q5DYY2_VIBF1	U		Vibrio fischeri ES114	312309	Fructose utilization	Fructose-1,6-diphosphate, Fructose-1-phosphate	MTLDEIAKLAGVSKTTASYVINGKAQKYRISEKTQLKVMAVVDEHNYRPDHAASALRAGSSRSFGLIIPDLENTSYAKLAKLLEFNSRKAGYQILIGCSDDDPETEMNVAHALISRRIDALFVASCLPNGSDYYLGIQEKGTPIIAIDRSLDDEHFGCVISEDFDAAYELTKSVVNENVKSIGLIGALPELNISRERQLGFEAKAKEKGLASIMGYGEHFNSESGKAIFEQWIKNDTIPDAIITTSYILLEGILDVLIEKPELMTRIKLGTFGDNRLLDFLPIKVNSLPQQFELIADSALALGLNASAKRYQAGIELIPRKIVIR
Proteobacteria/Gamma	Vibrionales	2234	20650	FruR	VIBHAR_05957	A7N5D0_VIBCB	U		Vibrio harveyi ATCC BAA-1116	338187	Fructose utilization	Fructose-1,6-diphosphate, Fructose-1-phosphate	MTLDEIAKLAGVSKTTASYVINGKAQKYRISEKTQKKVMAVVEHYNYKPDHAASSLRAGNSRSFGLIIPDLENTSYARLAKLIEQNSRKAGYQILIGCSDDNPQTEEKVAEALVSRRIDALFVASSMPAASEYYLKLQNSGTPVIALDRPMDDEHFCCVISEDFDAAFELTESVLSSEIESIGLIGALEELQVSKERELGFRSACQQEGNEALVGYGQHFSREEGKKVLEDWIAKGQLPDAVVTMSYTLLEGVLDVMLEKPELMGKVRLATFGDNRLLDFLPIKINSLPQQFELIADSAMELALNASAKRYKAGVELIPRKIVKRHSDAKA
Proteobacteria/Gamma	Vibrionales	2234	20651	FruR	VPA0814	Q87HZ2_VIBPA	U		Vibrio parahaemolyticus RIMD 2210633	223926	Fructose utilization	Fructose-1,6-diphosphate, Fructose-1-phosphate	MTLDEIAKLAGVSKTTASYVINGKAQKYRISEKTQKKVMAVVDEYNYKPDHAASSLRAGNSRSFGLIIPDLENTSYARLAKLIEQNSRKAGYQILIGCSDDDPETEKKVAEALISRRIDALFVASGMPSANEYYLKLQNSGTPVIALDRPMDDEHFCCVISEDFDAAFELTESVLSPEIKTIGLIGALQDLQVSKERELGFRSACQKDDTAMTVGYGLHFSREEGKKVLDKWVQADSLPDAIVTTSYTLLEGVLDVMLEKPELMSQVRLATFGDNRLLDFLPVKINSLPQQFELIADSAMELALNASAKRYKPGVELIPRKIVKRQ
Proteobacteria/Gamma	Vibrionales	2234	20655	FruR	VSAL_II0089	B6EQ75_ALISL	U		Vibrio salmonicida LFI1238	316275	Fructose utilization	Fructose-1,6-diphosphate, Fructose-1-phosphate	MTLDQIAKLAGVSKTTASYVINGKAQKYRISEKTQLKVMAVVDEHNYRPDHAASALRAGRSRSFGLIIPDLENTSYAKLAKLLEFNSRKAGYQILIGCSDDDPETEMNVAHALISRRIDALFVASCLVDGSDYYLKIQERGTPIIAIDRSLDDEHFCCVISEDFDAAYELTQSVINENVKSIGLIGALPDLNISRQRHSGFDAKVTEKGLSSITGYGEHFNSESGKAIFEQWIKEDTVPDAIITTSYILLESILDVLIEKPELMGTVKLGTFGDNRLLDFLPIKINSLPQQFELIADSALALGLNASAKRYQAGIELIPRKIVIR
Proteobacteria/Gamma	Vibrionales	2234	20652	FruR	VSAK1_22774	A6CVW1_9VIBR	U		Vibrio shilonii AK1	391591	Fructose utilization	Fructose-1,6-diphosphate, Fructose-1-phosphate	MTLDEIAKLAGVSKTTASYVINGKAQKYRISEKTQKKVMAVVEQHNYRPDHAASSLRAGHSRSFGLIIPDLENTSYARIAKLLEQNSRKAGFQILIGCSDDDPETEKLVADALVSRRIDALFVASAITEASDFYLTIQNRGTPVIAIDRSLDDEHFSCVISEDFGAAFELTNSVIDTSTQSVGLIGALPELNISRERQLGFESAAKDAGIECYVTYGEHFNNDEGKRVFSDWVEANSIPDAIVTTSYTLLEGVLDVLIEQPELMSKIKLATFGDNRLLDFLPTKVNSLPQQFELICDSALELALNASAKRYKHGVELIPRKLKMR
Proteobacteria/Gamma	Vibrionales	2234	20653	FruR	VS_II1031	B7VTW8_VIBSL	U		Vibrio splendidus LGP32	575788	Fructose utilization	Fructose-1,6-diphosphate, Fructose-1-phosphate	MTLDSFKRMIEVTFQILLNPFSFYTESIQHIIQLIQGSDHSLYDPTHKIQVTHMTLDEIAKLAGVSKTTASYVINGKAQKYRISEKTQQKVMAVVEEYNYRPDHAASSLRAGNSRSFGLIIPDLENSSYARLAKLIEQNSRKVGYQILIGCSDDDAETERKVAEALVSRRIDALLVASSMPDANEFYLKLQNSGTPVIAIDRPLDDEHFACVLSEDFEAAFELTHSILDDNIHSVGLIGALPDLNISRERHLGFEAANKAHTQQTGLAENKPMVVGYGEHFDRESGREVFEGWIAKGTVPDAIVTMSYTLLEGVLDVMVEKPELINQVKLATFGDNRLLDFLPFKVHSLPQQFEVIADSAFALALNASAKRYQAGIELVPRSLVKRG
Proteobacteria/Gamma	Vibrionales	2234	20649	FruR	VV20201	Q8D7F3_VIBVU	U		Vibrio vulnificus CMCP6	216895	Fructose utilization	Fructose-1,6-diphosphate, Fructose-1-phosphate	MTLDEIAKLAGVSKTTASYVINGKAKKYRISEKTQMKVMAVVEEYNFRPDHAASSLRAGNSRSFGLIIPDLENTSYARLAKLLEQNSRKAGYQILIACSDDDPETERKVADALVSRRIDALFVATSMADANEFYLAMQKSGTPVIALDRPLDDEFFSCVVSEDFGAAFELTSSLMSEEIQTVGLIGALPELNISRERHQGYLSAVKKMGKQAQSGYGEHFYREEGYRIMHEWLLADTIPDAIVTTSYTLLEGVLDVLLEQPELVNKVKLATFGDNRLLDFLPFKVNSLPQQFELIADSALELALNASAKRYKPGVELIPRKIVRRF
Proteobacteria/Beta	Comamonadaceae	5800	56758	FruR2	Aave_4253	A1TV05_ACIAC	U	*	Acidovorax avenae subsp. citrulli AAC00-1	397945	Fructose utilization	Fructose-1-phosphate	MQRTPYRRPGPGTRPFSHRLAQESGLASIKDVAQRAGVSTTTVSRVLTTPGAVRAPLRERVEQAIADLGYRPNLAARRLRQRRASIVGLIVSDIRSPFFTDVGRAVEDVAYRNGLRLILCNSDENPAKEQSYLELMADEQASGVILSPTMEGLRRLRPGDWPFPLVLVDRALESSRVDRVVLDNHAAARRATEHLLQSGYRRIALLAGIHSTTGQQRHAGYADALAAHGLAPRPLWLDPTRDAGQRATAQCLAAPPAERPDALLATNGLLLLGALQAVQAAGLRTPQDIGIAGFDNNDWTALPALDVTTIAQPTYDIGRTAAELLLQRMQDPARPARRVVLEGELVARGSSARS
Proteobacteria/Beta	Comamonadaceae	5800	56761	FruR2	Daci_2662	A9C1W5_DELAS	U		Delftia acidovorans SPH-1	398578	Fructose utilization	Fructose-1-phosphate	MSISINDVARAAGVSKSTVSRALAGGSVSEEVRARVAAAVQATGYRPNLMARRLRARDAGPMGVLVADIRNPFFTALIRAVEAEAYRQGRRVLLCNTDEDPQREAMYLQLMQEERIAGLIFAPTQASLHKLERMQLEFPVVLVDRAGAPAFHDSVVLDNAQACATLVRHLVDQGRRRIAGVFGSTSSTARERCDGYLAAMRDAGLEPDLRQLPPTSDAAEAEVAQWLRQPQRPDAFVASNSLLLEGCLRAIRAAGLRIPGDVALAGFDNERWTELVAPAITVIEQPVEAMGRAAFGLLMERLHAPDLPLRKVIMQGRCIVRESTQAAA
Proteobacteria/Beta	Ralstonia	5323	52286	FruR2	Rpic_3107	B2UCZ5_RALPJ	U		Ralstonia pickettii 12J	402626	Fructose utilization	Fructose-1-phosphate	MTVRIKDVAAAAGVSVATVSRALAGGPVSAELRRRVDAAVAASGYRPNLSARRLRSQQAQTVGLIVSDIRNPFFTSVSRAVEDAAYAAGLRVILCNSDEDPEKEAMYLRLMEEERVTGVILSPTRGIAEAQQPVDLGYPVVLIDRAGPTCGTDAVVLDNQQAAQALAEHLAAQGYRRIGGLFGRTSSTGAERQAGFATALARRGITAEARFILPTAEAAEAETLAWLSGAERDRPDALVASNAQSLLGVLRALRQLSLDVPRDLAVAGFDNEPWTELAGPGITVIEQPVYDIGRMAMAMLQERLAQPTLPTRRVLLTGRLVTRGSTPLRST
Proteobacteria/Beta	Ralstonia	5323	52285	FruR2	RSc2860	Q8XVH1_RALSO	U	*	Ralstonia solanacearum GMI1000	267608	Fructose utilization	Fructose-1-phosphate	MTVRIKDVAAAAGVSVATVSRALAGGPVSEALRKRVDAAVAASGYRPNLSARRLRSQQAQTVGLIVSDIRNPFFTSVSRAVEDAAYAAGLRVILCNSDEDPDKEAMYLRLMEEERVTGVILSPTRRIAESPAPVVLGFPVVLIDRAGPACGVDAVVLDNQQAAQALAEHLAQHGYRRIGGLFGRTSSTGAERHAGVAAGLARHGLAIDARFILPTAEAAEAETLAWLASGERPDALVASNAQSLLGVLRAIRRLSLDVPGDIAVAGFDNEPWTELAGPGVTVIEQPVYDIGRLAMTMLQERLAQPELPTRRVLLTGRLVARGSTPQRRM
Proteobacteria/Alpha	Rhodobacterales	5641	55323	FruR2	RSP_1785	Q3J5K1_RHOS4	U	*	Rhodobacter sphaeroides 2.4.1	272943	Fructose utilization	Fructose-1-phosphate	MTVSIKDVARAAGVAPSTVSRALGKGPVSAEVRAQVEAAVRATGYQPNLSARRLRSQVPATVGLVLADIRNPFFTRLSFGVEDAAYRAGLRVFLCNTDEDPAREAMHLEMMAGERVSGLILAPTRELRPEALRRLQMPVVLVDRDPEGAGCDAVTLDNEGAMRTLVDHVVASGRQRIAGLFGANSFTGEARARGFVAALARHGLAALVHRAPPNAVAGYAALADWLEAERPEALIVSNGLFLEAAVRFCHDRGLVIPRDLAVAGVDDDPWTGIVNPGLTVLRQPAETMGREALTLLLARLEMPDRPRRKLVLESELVPRDSTAPRLLSRDEPAA
Proteobacteria/Alpha	Rhodospirillales	5640	55307	FruR2	Acry_0186	A5FUY2_ACICJ	U		Acidiphilium cryptum JF-5	349163	Fructose utilization	Fructose-1-phosphate	MAVSIKDVARAAGVSPATVSRTLGGGPVSAALRDKVEEAVRRTGYRPNLSARRLRSQESQTVGLIVADISNPFFTAVARAVEHAAYRAGLRVILCNTDENPEKEAMYLQLMEQERVTGVIFAPTRASVERLDQGPRPSFPMVLIDRAGRASAQDAVVLDNFAAGSMLVEHLAGQGYRRIAGLFGNASTTGVERRDGYEAAMLRAGLSPSSRFIAPSIEAAEQEIARWFAKGNLPEAVIASNGLLLMGVVRALRATGRRMPEDLAIAGFDNESWTDLVGPGITVIEQPVAQIGEEAMRLLLERLDAPEAPVRKTVLGGRCVIRGSTARRALDEAAE
Proteobacteria/Alpha	Rhodospirillales	5640	55308	FruR2	AZL_c02640	D3P4H8_AZOS1	U		Azospirillum sp. B510	137722	Fructose utilization	Fructose-1-phosphate	MSVTGKTASIKDVALAAGVSVATVSRVLSNGPVSEALRKRVEDAVRATGYRPNLSARRLRSQHSQTIGLVVSDIRNPFFTAVSRAVEDAAYRAGMRVILCNSDENPEREELYLRLMQEERITGLIFAPTRATLDRLDDLDLDFPVVLIDRNAPTGGHDAVVLDNPRAAAMLVEHLHAQGYRRIAGLFGNTSTTGQERHEGYRAAMAAHGLAPAARFVAPYADAAEEAVVAWMAEPDRPEAFIVSNSLFLMGVVKAAHRLKLSIPDGLAVAGFDNEPWTELVGPGLTVIEQPVQDIGQSAMSLLFERLDAPDRPSRRLVLGGTCIVRGSTAARMADAG
Proteobacteria/Alpha	Rhodospirillales	5640	55311	FruR2	GbCGDNIH1_0413	Q0BV41_GRABC	U		Granulibacter bethesdensis CGDNIH1	391165	Fructose utilization	Fructose-1-phosphate	MSAVRTTEKVLNHSVDGTSSTMRAVGIKDVAEAAGVSPATVSRVLAGGKVSAALKAQVEDAIARSGYRPNLSARRLRSRNTQTIGLIVADIRNPFFTAVSRSVEQIAFASGMRVILCNTDEDPEREAMYLQLMEEERATGLILAPTLPAISRLAIHRPSLPVVLIDREGPAGCLDSVVLDNREASRTLTRHLLQNGYRRIGGLFGMASTTAVERREGYEQAMREAGLAFESRQSPATIPDSEQTAHAWLSSPHPPEALLVSNSLTLMGVTRAARSLGLSIPQQLGLAGFDNDHWTELVGPGMTVMAQPVEEIGRMAMDMLFSRLRDPDQPVRKIVLSGRQITRGSSVRTAA
Proteobacteria/Alpha	Rhodospirillales	5640	55315	FruR2	Rru_A1973	Q2RSX2_RHORT	U	*	Rhodospirillum rubrum ATCC 11170	269796	Fructose utilization	Fructose-1-phosphate	MDDNDAKPMTVSIKDVARHAGVSPSTVSRALGRGPISEPLRQQVEAAVRETGYRPNLSARRLRSRESGTVGLILADIGNPFFTALTRAVEDAAYQAGLRVILCNTGEDAEREAMYLRLMQEERVSGVIFAPTLAYLDHPPQSPLDFPVVLVDRAGPQGLYDSVVLDNEAACATLVDHFHARGYRRINGLFGKTSATGVERRRGYDDTMRAYGLEPKACAIAPHAEAAEVAVSRWLSEPEPPEAIVASNSLLLIGALRAVRRAWLRLPDDIALAGFDNELWTELVEPGMTVIEQPIEAIGRAAMSLLRDRMADPTLPPRQIVLKGRAIIRGSSAPALDERSF
Proteobacteria/Beta	Various betaproteobacteria	5801	56780	FruR2	CV3051	Q7NTK3_CHRVO	U	*	Chromobacterium violaceum ATCC 12472	243365	Fructose utilization	Fructose-1-phosphate	MTTSIKDVALLAGVSVATVSRVLGNGPVSAALRAKVEAAVAQSGYRPNLSARRLRSQHTHTIGLIVSDIRNPFFTSVSRAVEDVAYRSGMRVILCNTDENPDKEAMYLRLMQEERVSGVIFAATRATADSLDVAGLGFPVVMIDRAGPSARCDAVLLDNRTAAAELVDHLIGRGYRRIGGLFGNTSSTGAERHAGFQEAMERAGLAAAARFVAPSAEAAQAAVAGWLREAGAPEALIASNGLLLLGAVKAVRAAGIAVPGELALAGFDNDSWTELADPGMTVIEQPVDEIGRAAMEMLLERLQQPERPLRKVVLAGRLVARGSSRTRN
Proteobacteria/Gamma	Xanthomonadales	5251	51742	FruR2	Smlt2555	B2FSS3_STRMK	U		Stenotrophomonas maltophilia K279a	522373	Fructose utilization	Fructose-1-phosphate	MSISINDVARVARVSKSTVSRVLGGGPVSEDVRGRVELAIRQTGYRPNLQARRLRSRHTGIIGLIVADIRNPFFTALIRAVEEVAYREGLRVTLCNTDEDPEREALYLQLMHEERISGLIFAPTRTTVGRLERLTLDYPTVLVDRAAPGGPIDSVVLDNPAAMAGLVEHLVERGYRHIGGLFGSTSTTAAERRDGYLAAMRTHGLQPDYREVEPTAEAAIATVDQWLATPSRPEALVTSNSLLLMGALKAARGAGLAIPEALALAGFDNERWTELVEPGITVIEQPVEEMGRAAMSLLLERLRTPELPVRRLVMTGRCVVRGSTAAR
Proteobacteria/Gamma	Xanthomonadales	5251	51743	FruR2	XAC2500	Q8PJN0_XANAC	U	*	Xanthomonas axonopodis pv. citri str. 306	190486	Fructose utilization	Fructose-1-phosphate	MSISINDVARVAGVSKSTVSRALGSGPVSDEVRAKVEAAVRQTGYRPNLMARRLRSQQSGILGVIVADIRNPYFTALIRAVEEVAYKAGMRVTLCNTDEDPEREALYLELMQEERITGLIFAPTRVTVGRMHELALDYPTVLVDRAGPGSRYDSVVLDNGAAMAELVAHLQAQGYRRIGGLFGSTSTTAAERRDGYLAAMRAQGLQPDYREVAPTAEAAIAELGAWLANDRRPEAIVTSNSLLLMGALKAARTAGLRLPQDLALAGFDNERWTDLVEPGITVVEQPVEDMGRAAMSLLLERLSNPQLPIRRMVMTGRCVVRGSTGARIAGV
Proteobacteria/Gamma	Xanthomonadales	5251	51744	FruR2	XCC2369	Q8P874_XANCP	U		Xanthomonas campestris pv. campestris str. ATCC 33913	190485	Fructose utilization	Fructose-1-phosphate	MSISINDVARVAGVSKSTVSRALGTGPVSEEVRAKVEAAVRQTGYRPNLMARRLRSQHSGILGVIVADIRNPYFTALIRAVEEVAYKAGMRVTLCNTDEDPEREALYLELMQEERITGLIFAPTRVTVGRMHELVLDYPTVLVDRAGPGSRYDSVVLDNAAAMAELVAHLQAQGYRRIGGLFGSTSTTAAERRDGYLAAMHAQGLAPDYREVAPTAEAAIAELEHWLAAADRPEAIVTSNSLLLMGALKAARTAGLRLPQDLALAGFDNERWTDLVEPGITVVEQPVEDMGRAAMSLLLERLASPQLPIRRMVMTGRCVVRGSTGARRPGI
Proteobacteria/Gamma	Alteromonadales	5242	51673	GalR	MADE_00229	F2G3P5_ALTMD	U		Alteromonas macleodii 'Deep ecotype'	314275	Galactose utilization	Galactose	MSIRPSRPHAIKTKFEKKMATIKDIAQAAGVSLATVSRVINNGPKVGNDTRKRVKKIMEEMGYRPNANARALVTKRSASLGVVIAELHDPFFAMLAHGVESITRKNNVQILLSAGSIEKETELRAIETLLEHRVEAMVVHSKALDDETLIGFAKQVPGFVLINRYIPEIANRCVWLDNVTGGRLMAEYAISQGHKHLAVISSQYRIDDPNHRLEGIRNAVDNAKLSLTESMIEYATPDQEGGELAMQNLLATGAQFTAVLAYNDAMASGAMTMLQDHGICVPDQVSVMGYDDVLLAKYCRPKLTTLRYPVEMMAAKAAELALKYASGSKPEDGLTFKYTPTVVKRDSIIRI
Proteobacteria/Gamma	Alteromonadales	5242	51679	GalR	PSHAa1771	Q3IH80_PSEHT	U	*	Pseudoalteromonas haloplanktis TAC125	326442	Galactose utilization	Galactose	MTTIKDVARIAGVSIASVSRVINNGPKVSKATIEKVNKVMQELGYTPNANARALVTRKSMTIGVVIPELTDPFFALLASGVDKVARENNMQLLLSTAGQSVESERAAINLLLERRCQTVVMHSKIIPDCELITLCEKLPGLVLINRHIEQIKHKCIWLDNEEGAKIAARHLMTLKHKNIACISSKYQIEDPALRLNGFSAELNMAGSPISPALIKYAEPTLQGGQSAAQNLLASGQPFSAIFVYNDAMAIGAISTLEDNGYKVPGDVSVIGFDDVLIARYSRPKLTTLNYPIEKMAQHAAQLALTHFKNEIVESVSHSEHKYLPRLVKRESTSIKNSP
Proteobacteria/delta	Desulfovibrionales	5302	52100	GalR	Dde_3654	Q30V49_DESDG	U	*	Desulfovibrio desulfuricans G20	207559	Galactose utilization	Galactose	MRQYTIKDIARELGVSPSTVSRALSGHPGISARTRSRVQELARLHNYQPNLLAKSLQQKHSSTIGVIVPEIRHDFFAATISGIEEVAYTAGYAIMVCQSHETLDRETTNIAALLGQRIAGLLLSVSCRTHDARHLAPVLRSRTPLVVFDRVPEGFAGSTVTTDDEQGACDITALLLQKGYRRIAHIGGPPHLAISRRRYAGYTKALAAAGIPQFSGYHIQGGFDEEDGRRGAMQLFDLAQPPDAIMAVTDPVALGVYSAARQRGLRIPQDIAVTGFSGNPVGELITPRLTTVYQPAFEMGRRAAGLLLEQIRGTAAQSTATVSLPTRVVVRESA
Proteobacteria/delta	Desulfovibrionales	5302	52104	GalR	Desal_0506	C6BXL5_DESAD	U		Desulfovibrio salexigens DSM 2638	526222	Galactose utilization	Galactose	MGHMTLKDLASKLGISASTVSRALHDHPDISDKTKEVVMAAAEKYGYQPNPIAQSLKKQSSKVIGVIVPEIRHNFFATVISGIEEVAYNAGYIIMVCQSNETLQREIMTTKALAANRVAGVLMAISLETTNYDHMRALMHQNIPLVQYDRVVDELDTGKVVIDDFRASYKMTSHLIDRGYKRIGFLAGREGISMNRLRFNGYLQALKNHGAPFYPELNINIGGCRGSNGRAGAEEYLKMDNPPDAVLCINDPVAVGAFCRFREAGWRIPEDVALAGFSGSPESALIDPALTSVGQPAFEMGKTAATLLLKQLKDKDNFRPETITLDTELLIRGSSYKEDV
Firmicutes	Lactobacillaceae	4351	42183	GalR	LVIS_1901	Q03PB1_LACBA	U		Lactobacillus brevis ATCC 367	387344	Galactose utilization, Galactosides utilization	Galactose	MVIAATLKDIASAVGVSLATVSRVLNYDRTLSVSESTRKQIFEVAEELNYTKLKRHALVSTKPLKIAIVQWYSKTKELDDLYYMSIRMGLEKRCEAQRFQVSQTFQNDLKAIEDDVDAIIAIGKFSNQQVTTMAQLTPNLVFVDQDQLCHGFDSVVTDFRFAVNQVIEFFMQRGQKQIGLLYGTEWTTDGQLEVIDPRYKAFRQEMEARQAFDPKLVFAGDYTNHSGYQEMQTAIAQLGDDLPSAFFVSNDPMAAGALKALHENGLDVPGRVNLFSFNDTTIAKYVFPELSSVHVHTELLGATAVDLVENRIQSGRKTPQLVTVGTELMLRESTGK
Firmicutes	Lactobacillaceae	4351	42184	GalR	LSEI_0667	Q03BB5_LACC3	U		Lactobacillus casei ATCC 334	321967	Galactose utilization, Galactosides utilization	Galactose	METEKTMTTITDIAKAAGVSIATVSRILNYDTTLAVTPETRQRVLKTAEKLAYKPRRRKRVPTQTTVALIQWRSEQEELNDLYYLQIQYAIEARAASAGYHLQNLHLEQLGAETTQNVQGVIALGKYDAGEVATIKALAQPVVFVDQNMLAFDCDSVTSDYAGPIKQIIHHFQSVGINDIGFLGGVETSRSGREQFQDVRTAAFDRVMHAENLMQPAFRFIGAFTPDSGYELMKQAITKLGDTLPHGFIVANDTMAVGALRALNEAKIEVPQRVSVISFNDVAVAKFTTPPLSTVHAATDQMGQTAVELLQARIKDPKRVPRQVNFKSELIMRASSL
Firmicutes	Lactobacillaceae	4351	42186	GalR	LAF_1790	B2GEP4_LACF3	U		Lactobacillus fermentum IFO 3956	334390	Galactose utilization, Galactosides utilization	Galactose	MAVTLKDIANRAGVSLATVSRVLNNDPRLSVSVETRRKIISIAEQLSYTKRPKSQVTGRRIAIVQWYSAERELDDIYYMSVRMNVEQAAQQAGFMTMTVFENNMDQIPQDIDGIVAIGKFSGHQLHLFEKLTPAVVVVDYDVLVGGLDCVLPDFVGGMNQAAGYLTTHYQNIGLIAGLELTTDGQRVRDVREKTFLNALKDCERYNPKLVKVENYTVDGGYKAMKELLAGPESLDAVMVTNDAMAVGALRALHEAHVVIPDQIALVSFNDIESVTCNLYPALSAVHVATDQMASVAIELLGRRLADSELAPQRVVVGTRLMLRQSTPPEETNS
Firmicutes	Lactobacillaceae	4351	42189	GalR	lp_3488	F9UUF4_LACPL	U	*	Lactobacillus plantarum WCFS1	220668	Galactose utilization, Galactosides utilization	Galactose	MAATLKDIANKVGVSLATVSRVLNKDQSLSVSDTTRQRILDAAEALQYSKNKRHTVTTARKRLAIVQWYSESKEQDDLYYMSVRMGIERRGQDNQFEVTRIFQNNLQELGPDVDAVIAVGKFSEPQVKDLASVTDNLVFVDDDQFDAGFDSVITDFRLATEKVVDYFWQRNFHHIGFIHGQEMTTDHQLAVVDRRMLGFRAAMERRHAFDPKFVFKGDYTSESGFKMMQKAIRKLGDQLPGAFFVANDPMAAGALKALQASGIQVPERVKLFSFNNTSLATFVYPELSAVNVDTELMGATAVNLVISRLAGRTTTQRVELGTNLVERASSK
Firmicutes	Lactobacillaceae	4351	42189	GalR	lp_3479	F9UUE5_LACPL	U		Lactobacillus plantarum WCFS1	220668	Galactose utilization, Galactosides utilization	Galactose	MTMAVTLKDIAQRADVSLATVSRVLNYDKTLSVSEQTRKRVFTIAGELRYSKRKRQHIKALMRKNIAVIQWYSKIQEHDDLYYLAIRKGIEHQAQVCGFTTTSIFQNNLDQVGDDIDAIVAVGKFSPVQVQQLSRLSSQLVFVDDDHFAQGFSSVVTDFTFATNRVVDYFWRRGIRDIGMIYGKEWSTDQQVEIPNQRQQSFEQALQRHHAYHAEYVLAGDYTSQSGYLMMKRAIEMLGDRLPHAFFIANDPMAAGALKALQQADIAVPQRVKLFSFNNTTLAEYVYPEISSVNVETELMGKTAIDLLVSRFQDDRQAAQRIELGTTLVERESTK
Firmicutes	Lactobacillaceae	4351	42190	GalR	LAR_0856	B2G7E0_LACRJ	U		Lactobacillus reuteri JCM 1112	557433	Galactose utilization, Galactosides utilization	Galactose	MTGIRKIAREAGVSPASVSRVLSNDSSFSVSKQTRARIKEVAAKYNYHPHLNRAVTPPITPRSILVLTTHSLETEAHDPYFIQVHDGIIQEASKQNIQIKAFVRFPNKAFQFTDAQKYDGVIVAGVFTQEFYANLAKNNPHIVLIDDYRYLPAYDIIRNSYFEATQIVLDQLLENGLNKIAFIGGNIHPMNNNGETTDSYQDIRARAYLMWTKLHNISPLITLNGWTPKDGFDSMNTLLKDNFQAALIASDQLTIGAYRALKQHQLKVPQDLQIISYNDSDIAEYLVPSLSSINPASLSMGKIAVQRLVHCLNNPNEIPIHINLPAKATWRESSEINLN
Firmicutes	Lactobacillaceae	4351	42190	GalR	LAR_1660	B2G9P4_LACRJ	U		Lactobacillus reuteri JCM 1112	557433	Galactose utilization, Galactosides utilization	Galactose	MAVTLHDIADKAGVSIATVSRILNNDVTLSVNEKTRQRVLATAEEFNYTKHKRARNNQVQRVAVVQWYSLTQELDDLYYMAIRMGIERAAQQQGLQTVPVYQNNMEEIPRDVTGIIAIGKFSDSQVQALRLVTSNIVFVDYDSLAAGYDCLVPDFENAVRSVISEFVSEGINDIGMLAGTEKTTDQQIVPDLRRFYFESNLRQQNLYHPEFIFAGNYTSMSGYNAMKKAIATLGDRMPHGIFVANDPMAVGALKAIQEAKINVPNRIALISFNDTAIVKYVYPSMSTVHVATDEMAHAAVDMMIKRLQNPNNDPCKTVVGTHLIKRQTTR
Firmicutes	Lactobacillaceae	4351	42191	GalR	LGG_00656	C7TAA8_LACRG	U		Lactobacillus rhamnosus GG	568703	Galactose utilization, Galactosides utilization	Galactose	MTTITDIAKAAGVSIATVSRILNYDATLAVTPETRQRVLKTAEKLAYKPRRRKRVATQTTVALIQWRSEQEELNDLYYLQIQYAIEARAASIGYHVQNLHLEQLNAESVANVQGIIALGKYDAGEVAEIKALGLPIVFVDQNMLAFDCDSVTGDYAGPIAQIIDHFQKVGIDDIGFLGGLETSRSGREQFQDVRTATFDRVTKAAGIDHAEFRLIGEFTPDSGYRLMRQAIEKLGERLPHAFIIANDTMAVGALRALNEANISVPQRVSVISFNDVAVAKFTTPPLSTVHAATDQMGQTAVELLQARLNDAKRVPRQVNFKSELIMRASSL
Firmicutes	Lactobacillaceae	4351	42192	GalR	LSA0763	Q38XL3_LACSS	U		Lactobacillus sakei subsp. sakei 23K	314315	Galactose utilization, Galactosides utilization	Galactose	MATIKDIAQLAKVSNATVSRVLNYDQSLSVSDETRQRIFEAAESLSYTKNTKKNNNHRGRIAIVEWYTATEELEDLYYLSIRLGVEKKLQELGFEVTRFFQNDPFDTLYDAAGVIVIGKYSLGQITRLKKLNRNLVFVDMNTLDYEISCVMTDFKTPVKAVVDHFMASGLTKIGMLTGQESTSDNVKLDTDPRSTHFKHYLKKQNNFHPEWLLTGDFTPESGYQLITQLLHEQAENLPEALFIANDAMAVGALRALHEAAIKVPEQLSLISFNDTSICQYTFPTLSSVKVYTEQMGQSAAELLIKQLDAEQVIPQVITIGTSLTLRNSSK
Firmicutes	Lactobacillaceae	4351	42193	GalR	LSL_0380	Q1WUZ5_LACS1	U		Lactobacillus salivarius subsp. salivarius UCC118	362948	Galactose utilization, Galactosides utilization	Galactose	MATIKDIAKLAGISPATVSRVLNYDESLSVGDETKRRIFKTAEKLNYSKHKKKNKEEHLNKIAIVQWYAEAQELTDLYYYSIRLGIEKRAQELGYEVVRIFHDDPLDAIQNVDGIIAIGKYSTNEIQQLDNLNANLIFVDSDSLSNGFSCVVTDFQNSVITVLDHFLEKGQKNIGLLAGEEHTSDNSQTLIDLRFTIFKDYLSRLNLYNHQNVYVRSFNPESGYKMMKKAIVELGDNLPEAFFTANDAIAIGAVRALQEEKISIPDRVSIISFNDTSITKYVYPSLSSIKVFTEEMGVEAVNLLLDYIAHPFNVAKKVTLGTKLVLRDSTIN
Firmicutes	Lactobacillaceae	4351	42194	GalR	LEUM_0881	Q03XT3_LEUMM	U		Leuconostoc mesenteroides subsp. mesenteroides ATCC 8293	203120	Galactose utilization, Galactosides utilization	Galactose	MVTIKQIALETDVSSSTVSRVLNNDLTLSVSDETRRKIIDAAQRLNYTKKHKKSISKKLIHIAVLTVFSEIREASDAYWRQIYLSIEQNAQDQNIIVDEIIRINQGINIADFATYDAIIILGDMTQKAVNQLQKINERIVLVDAKTRYETIDSVNPELRLMTTRILDEFYQAGRRHIGFIGGVNDLLELDGSSTLAVEDVRSEIYRNWAEEHQMSSHFYTGPWHAETGMQGAISLLREEHSIDALLVASDPIAIGAINALKSENLEPGIDIDVVSFDNVELSSYLVPALTTVDLNPAALGKTALEQAYELANDERDWTVWATIPGNLKYRETFKK
Firmicutes	Lactobacillaceae	4351	42195	GalR	OEOE_0302	Q04GZ4_OENOB	U		Oenococcus oeni PSU-1	203123	Galactose utilization, Galactosides utilization	Galactose	MATTLKDIAEKTGLSPTTISRVLNYDKTLSVSDETRDQIFSVAEKLNYIKSHHRSSSISTKKIALVQWYSEEKEQDDLYYLMIRKGVEKRGQQLGIEVMNIFKNDTSTLETDIDGIIAVGKFSPEQVKDLALVTDKIVFVDDDQFAKGFDSLLTNISLAMKKIVDFFWKEKIRDIGLIYGEEETTDHLRKIIDRRYIAFKKELSEKHAYDPKLVFKGDFTNDSGYQVMKEAIRKLKDRLPHAFFISNDPMAAGALKALREAKIEIPKRVSIFSFNNTSLASYVYPELSSVAVGTEEMGMAAINMLKDQLTASKQPLAKRVELETRLIFRQSTL
Firmicutes	Lactobacillaceae	4351	42196	GalR	PEPE_0201	Q03HM0_PEDPA	U		Pediococcus pentosaceus ATCC 25745	278197	Galactose utilization, Galactosides utilization	Galactose	MAATLKDIADKVGVSLATVSRVLNKDASLSVGDETRQKILKTAEALHYSKSKRHNNLTTRKRLAIVQWYSETEEQDDLYYMSIRMGIEQRGQDNQFEVTRIFQNNLQELGPNVDAVIAVGKFSKPQVEEIAAVTDNLVFVDDDQFEAGFDSVITDFQLATEKVVDYFWQQGIEDIGIIHGLEMTTDHQLTVTDRRMLGFKAAMTKRNAFKPEFVFEGDYTSESGSKMMQKAIDVLGDQLPKAFFVANDPMAAGALKALQTNGIKVPDRVKLFSFNNTSLATFVYPELSAVNVDTELMGATAVNLVMSRLAGRTTTQRVELGTRLVERASTK
Proteobacteria/Gamma	Pasteurellales	5263	51833	GalR	NT05HA_1260	C6AP57_AGGAN	U		Aggregatibacter aphrophilus NJ8700	634176	Galactose utilization	Galactose	MATVTIRDVAKQAGVSVATVSRVLNNHPSTREDTRLAVLSAVEQLDYRPNANAQALASQNSDTLGVVVTDVTDAFFAILVKSVDHVAMEHGKNILIGMGYHQAEKEKEAIDTLLRKRCNCLVVHSKALDDQTLAAYLESVPGMVIINRCIKGYESRCVSLDNQKGTYIATTTLIKAGHRHIAYIGSNHKINDEADRKQGYLDALTEHHIPVAENAIVHSSPDFEGGEEAMINLLSYDDNLTAVVTYNDSMAAGALSVLNENNIKVPKQFSIIGFDDMPIARYLVPKLTTIRYPIDLMANYAAKLALSLVDKTISLPINPQFNPTLVRRFSVENAYHSSEKS
Proteobacteria/Gamma	Pasteurellales	5263	51835	GalR	HI0821	GALR_HAEIN	R	*	Haemophilus influenzae Rd KW20	71421	Galactose utilization	Galactose	MSTIRDVAKLANVSVATVSRVLNHSLSVSENTRLVVEQAIAQLAYQPNANAQALAVQNTDTIGVVVTDVTDAFFAILVKAVDKVAEAHQKTILIGIGYHHAEKEREAINTLLRKRCSSLVVHSKALSDDELSHYLNTVQGMVIINRVIKGYEHRCVSLDNQKGTYLATEMLIRYGHQHIAYIGSNHAIFDEVERRNGYLAALKDHNYPIIEQAITLNSPDFEGGEKAMIDLLSYNKNLTAVVAYNDSMAAGAISVLNENNISVPSQFSIIGFDDMPIARYLIPKLTTIRYPIDLMATYAAKLALSLTDEKIITPPVVQFNPTLVRRFSVESR
Proteobacteria/Gamma	Pasteurellales	5263	51838	GalR	MS0644	Q65UV9_MANSM	U		Mannheimia succiniciproducens MBEL55E	221988	Galactose utilization	Galactose	MITIRDVAKQAGVSVATVSRVLNNASSSEKARKAVQSAVEKLGYSPNANAQALALPTTDTIGVVVTDVTDAFFAILVKAVDQVASSYNKTILIGIGYHNAEKERNAIDTLLRKRCSCLVVHSKALSDEELANYLEQVPGMVIINRSIQGYEHRCVSLDNQRGTFLATETLIRLGHKRIGYIGSNHHINDEEERRQGYIQALQHHRLPQIDDAIIQSSPDFEGGEEAMIKLLSYHSDLTAVVAYNDSMAAGALSVLNENNINVPRQFSIIGFDDMPISRYLIPKLTTIRYPIDLMANYAARLALSLVNEGIETPLHAQFNPTVVRRFSTENCNNP
Proteobacteria/Gamma	Pasteurellales	5263	51839	GalR	PM1037	Q9CM10_PASMU	U		Pasteurella multocida subsp. multocida str. Pm70	272843	Galactose utilization	Galactose	MVTIHDVAQHAGVSVATVSRVLNNHPSASEKARIAVQAAIEKLGYQPNANAQALAMKNTDTIGVVVTDVTDAFFAILVKAVDKVAEEYKKTIIIGIGYHNAEKEKEAIDTLLRKRCSCLVVHAKALSDEVLCQYLEKVPGMVIINRVVQGYEHRCVSLDNEKGTFIATETLIKLGHKKIGYIGSNHYIMDEIERHRGYLAALKQYHIPVIEHAITHSSPDFEGGEEAMINLLSYNSDLTAVVAYNDSMAAGAISVLNENNIRVPAQCSIIGFDDMPIARYLIPKLTTIRYPIDLMANYAAKLALSLVDQDVKKPSHIQFNPTLVRRFSTEQHSQ
Proteobacteria/Gamma	Shewanellaceae	587	5478	GalR	Swoo_2083	B1KRG0_SHEWM	U	*	Shewanella woodyi ATCC 51908	392500	Galactose utilization	Galactose	MSTIKDIARVAGVSVATVSRVVNNDPKVKEKTKLKVTKVMLDLNYTPNANARALVTQKNTTIGVIIPSLTDPFFASLANGVEQVARQQSMQLLLSTGLVSAESERQAINLLRERRCDVMVVHSKKLTDDELIALSEQIPGLVLIDRHIEQISHRCVWLDNLEGGKIAARHLLALNHQKFASISSKYQIEDPGLRLEGFTRELTGAGFAIDKELIEYGEPNLQGGEIATQHLLSSGKTFSALFVYNDAMAIGAISTLEDNGYRVPQDISVIGFDDVLLSRYSRPKLSTLNYPIEEMAQQAANLAIELTKERKAAKDEYKVESKTHKYVPRLVKRESTSLCNEN
Firmicutes	Streptococcaceae	4350	42171	GalR	Sez_1740	B4U556_STREM	U		Streptococcus equi subsp. zooepidemicus MGCS10565	552526	Galactose utilization	Galactose	MVTLKDIAALAKVSPATVSRVLNKDQSLSVGQETKHRILTIADELGYQKHLKATNSPKSKLKIAIVQWYSQEEELNDLYYYAIRIGIEKRAYELDYDIVRYFNNDILRVSDDHAGIIAIGKFSAYQIKELEALSQHLVFVDSDTLELGHPCVTTDFDNAVLKVLDYFMSKGIYSIGMIAGEEKTTDGREALVDQRFRTYKNYASEHGIYQPKYVYIGPFSAQSGYELMTQAIEELGDDLPKAFFIANDTLAIGALRALQERGLAVPERVELISFNDTPLTRQVFPALSSVTVFTEDMGRMAVDVLNRNILNPERVKTMTILATELTLRDSTIG
Firmicutes	Streptococcaceae	4350	42172	GalR	GALLO_0197	D3HGU1_STRG3	U		Streptococcus gallolyticus UCN34	637909	Galactose utilization	Galactose	MATLKDIAKLAKVSSATVSRVLNQDATLSVSEETRHRILTVAEELGYEKHKRSTNILQERQKIAIVQWYSEQEELNDLYYYSIRIGLEKRAQELDYDIIRYFNNDILTISENICGIIAIGKFSSAQISKLEKLSQNLVFVDSDTLNAGHPCVTTDFDNAVIKVLDYFMDQGFTKIGMIAGEERTTDQQELIVDQRFRTFKNYAYENNLYNPNYVFVGDFSAQAGYELMKKAITELGNDLPQAFFVANDTLAIGALRALQEASIIVPDRVSLISFNDTPLTKQVFPALSSITVYTEEMGRTAVDILNRQLINHNTIPTMTRLATTLTLRDSTNKRR
Firmicutes	Streptococcaceae	4350	42173	GalR	SGO_0904	A8AWP0_STRGC	U		Streptococcus gordonii str. Challis substr. CH1	467705	Galactose utilization	Galactose	MATIKDIAHAAGVSSATVSRVLNQDQAMSVSDETRNKIFTIAKQLGYKKSKKTNKRSKSSHRIAIIEWYTEQEELDDLYYYSIRLGAEKRAQELGYEIIRIFNNDSLTQLENIDGIIAIGKFSPGKIKELENYSDKLVFVDSDTLKSGHSCVTTDFENSVINVIDYFINSGLKKIGMIAGQETSSDKSTLLSDPRLNTFQSYLKQLTLYDPNLIKIGSFSSEAGYKIMKEFIMELGDNLPPALFAANDALASGALRALQEAKIPVPERVGLISFNDTSLAKYMYPKLSTVTVFTEEMGKQAIQILEQSFQKDSFSVPYMVKLATRLTIRESSI
Firmicutes	Streptococcaceae	4350	42174	GalR	smi_0519	D3H7C7_STRM6	U		Streptococcus mitis B6	365659	Galactose utilization	Galactose	MATLKDIAQLASVSIATVSRVLNRDQSLSVTEETRHRILTVAEELGYTKHLKTGESHKPKQKIAIIQWVSEQGELDDLYYYQIRLGIEKRAQELDYDILRYFNDHPFTLSEEVIGILCIGKFSRAQISAFEEYQKPLVFLDSDPLSMGHTCIITDFYTAMKQVVDYFLSQGLNRIGILTGLEETTDQEEIIEDKRLENFKNYSQAKGIYHDELVFQGSFTAQSGYNLMKEAIQSLGDQLPPAFFAASDSLAIGALRALQEAGISLPDRVSLISFNDTSLTKQVYPPLSSITVYTEEMGRAGMDILNKEVLHGRKIPSLTMLGTRLTLRESTRND
Firmicutes	Streptococcaceae	4350	42175	GalR	SMU.885	Q8DUN0_STRMU	U		Streptococcus mutans UA159	210007	Galactose utilization	Galactose	MIMATLKDIAKLAKVSQATVSRVLNKDETLSVSQKTKHRILMVADELGYQKHLKTTNSPQVRQKIAIVQWYSQQEELNDLYYYSIRIGIEKRAQELDYDIVRYFDNDISKVSADIVGLIAIGKFSTYQIAELEKLSDKLIFVDSDTLNAGYPCVMTDFDNAVVKVLDYFLDHGLTKIGMIAGEEKTTDGRELLIDQRFRTFRNYAYEQDIYNPNYIFIGDFSAQTGYHLMKKAIKELKENLPQAFFIANDSLAIGALRALQEANIPVPNRVSLISFNDTALTKQVFPALSSITVFTKEMGRTAVDILNRQILNPDIIPSMTRLTTQLTLRESSI
Firmicutes	Streptococcaceae	4350	42176	GalR	SP_1854	Q97NZ5_STRPN	U	*	Streptococcus pneumoniae TIGR4	170187	Galactose utilization	Galactose	MATLKDIAQLASVSIATVSRVLNRDQSLSVTEETRHRILTVAEELGYTKHLKTGESHKPKQKIAIIQWVSEQGELDDLYYYQIRLGIEKRAQELDYDILRYFNDHPFTLSEEVIGILCIGKFSRAQISAFEEYQKPLVFLDSDTLSLGHTCIITDFYTAMKQVVDYFLSQGMDRIGILTGLEETTDQEEIIQDKRLENFKNYSQARGIYHDELVFQGRFTAQSGYDLMKEAIQSLGDQLPPAFFAASDSLAIGALRALQEAGISLPDRVSLISFNDTSLTKQVYPPLSSITVYTEEMGRAGMDILNKEVLHGRKIPSLTMLGTRLTLRESTLNQE
Firmicutes	Streptococcaceae	4350	42178	GalR	SSA_1000	A3CML1_STRSV	U		Streptococcus sanguinis SK36	388919	Galactose utilization	Galactose	MATIKDIAQTAGVSPATVSRVLNYDKSMSVSDETRKKIFDIAEQLNYKKSKRQKKTVPQTHRIAIVEWYTELEELDDLYYYSIRLGIEKKAQELGYDIVRIFNNDSLSQLEQIDGIIAIGKFSSKQVKELEQYSPALVFVDSDTLDQGHSCVTTDFEHAVTHVLDHFLQQGFREIGMIAGREETADGTTSLDDPRLACFCRYLSDKGLYQPTYVKTGKFSSESGYQLMKDMIDEQKEQMPKAFFIASDALSVGALRALQEAGIAVPQDVQIISFNDTSIAKYVYPPLSTVTVFTEEMGKQALQMLDQVIKTDESPISYMIKLSTKLTLRESSL
Firmicutes	Streptococcaceae	4350	42179	GalR	SSU05_0359	A4VT87_STRSY	U		Streptococcus suis 05ZYH33	391295	Galactose utilization	Galactose	MAQELGYTKHIKKQAPQQKGTIGIVQWYTESEELADLYYYSIRASIEHTASLLGYQIVRSFNDLTNPLLQEVDGIIAVGKFSSGQIAELSSLSSKIIFVDSDTLTEGFSCVTTDFEHSVQTVIDHFHSQGLTDIGLLVGQEETTDGHQLPTDPRLTAFRDYLDTLGMLQEDYIYQGKFSTQSGYELMSQAIEDLGDKLPPAFFMANDTLAVGALRALQERQIAVPDRIQLITFNDTAITRQVYPALSSISVFTEEMGQEAMQLLDRIITSPTPHHPRKIKLGTQLVIRESSY
Firmicutes	Streptococcaceae	4350	42180	GalR	str1403	Q5LYY6_STRT1	U		Streptococcus thermophilus CNRZ1066	299768	Galactose utilization	Galactose	MATLADIAKLAGVSISTVSRVLNKDETLSVTEDTRHRILTIADEIGYTKYKTINNSKKEKYQVAIIQWVSEEHELDDIYYYNIRLGIEKRAYELDYEMLHFFNDIPSSLGEEVVGVLCIGKFSREQIAKLERLKKTLVFVDSDTLNQGHPCVTTDFENSVQSALCYLKEQGCNNIGLLIGQEKTTDATEIISDPRLRSYRNYCMEKGIYDPLFILTGDFTVQSGYELLDSKIKSGATLPDAYFAASDSLAIGALRALQENGIKVPDDIQIISFNDTTLAKQVYPPLSSVTVYTEEMGRTAMDILNKQLLAPRKIPTLTKLGTKLTLRNSTK
Thermotogae	Thermotogales	746	7206	GalR	Fnod_0418	A7HK50_FERNB	U		Fervidobacterium nodosum Rt17-B1	381764	Galactosides utilization	Galactose	MKKFVTIRDIAREAGVSINTVSRALNDKPDINVETKKKVLEVADRLGYIRDATAVSLRYGLTRVIGVILEDSSNPFYSEVLKGIEMAAKKKKFNVIFMNTERSYELENEAIKTMIGRRVDGMIISPTQEKCDDIKLLSEKGIPFVVLGVHFDELNVPEIYTDDEKGGYLATKHLIEIGRRRILFLNGFTYKSVAKMRLNGYRKALKEFGLEYDKSLVHEIEEGYENAYNKVKELLKKGIKFDSIFCFNDVFAIGAIGALKEEGIKVPQDIAVVGYDDIYFSKFISPSLTTVKIDKILEGKLAFEMLHGILTKKTGKNVKNVLDVELIVRESTIDKIGE
Thermotogae	Thermotogales	746	7207	GalR	Pmob_0832	A9BHE7_PETMO	U		Petrotoga mobilis SJ95	403833	Galactosides utilization	Galactose	MREVVKISRSSFVTIKDIAEKAGVSVNTVSRALNDKPDINPQTKEKIEKIAQELGYVKNIYATMLKSNVTHTIGVIMPDSSNPFFSEVFKGIDKAARDNNYQIIIMNSEGLYENEEKFLKTLLERRVDGILLFPMQKSYEDIQELIKEHFPIVLVGREIDGWNVDEIFSDEVKGGYLATKYLIEKGCKKIKMITDQLYNSASNGRLQGYKKALKEKGLTFFEDDIKICEGIHEGYHVKAGYDKTIEMIRKKEEFDGIFCYNDLIAYGAIKALKENNLKVPQNVSVVGYDDIAFSRLIDPELTTVKVKKFEMGYEAFQMLYKRIKSKKRDNSSTRKVLDIELVVRKS
Thermotogae	Thermotogales	746	7204	GalR	THA_1577	B7IDD8_THEAB	U		Thermosipho africanus TCF52B	484019	Galactosides utilization	Galactose	MKQKKYVTIKDIAKVAGVSVNTVSRALNDKPDINSETKKRILDIAKSLGYVKNITASTLRNNSTKIVGVILADSANPFYAEVLKGIEAASRKYGYQIILMNTERVYENEEIAIKTLLQRRVDGLLIAPVQDRAEDIKRLNEKVNIPFVIVGRHFEDIKVDEIYNDEIKGGYIATKYLIDLGRKNILMINGSMFKSPAKMRYEGYKKALNEVGLIDNMVISDIDINGGYEAVKKILKEGQKVDALFCYNDLVAIGAIKALKEEGIKIPEDVAVIGYDDIYFSSFVCPTLTTVRIKKFELGYESFKMLHNRICGRRKNIKQKILDVELIKRESA
Thermotogae	Thermotogales	746	7203	GalR	Tlet_0914	A8F5P6_THELT	U		Thermotoga lettingae TMO	416591	Galactosides utilization	Galactose	MSLRKRYVTIVDIAKRAGVSINTVSRALNNKPDISEDTKKRILSIARELGYIKNITASLLRQKQTQTVGVILADSSNPFYAEVLKGIEAASRKYGYQIILMNTERVYQNEVNAIELLFQRRVDGLLIAPVQEKDEDIKKLSRKDIPAVILGRHFEDIEIDEIYNDELKGGYIAANHLLENGRNKTLIICGPLYNSAARMRVEGFRKALCDHGIEFDRRRVFITDINIEDGYTAIKNALEERIKFDSVFCYNDLVAFGAIKALKEMNFSLPEEVAVVGYDDIIFSSFICPSLTTVKIKKYEMGFEAFRMLLERMRGKRKRARKILLDVELIVRESA
Thermotogae	Thermotogales	746	7203	GalR	Tlet_1130	A8F6B1_THELT	U		Thermotoga lettingae TMO	416591	Galactosides utilization	Galactose	MKKFVTIKDIAKKAGVSINTVSRALNNKPDINPETKKKVLEIAKELGYIRDLSALSLKNGVTRTIGVVFEDSSNPFYAEVFKGVEHQARKYGYQVILMNTERDYIREIQAVETLIEKRVDGIIISPTQFDKKDIEHLINLNYPFVVLGVHFENSQFDEIYSDDLKGGYLATRHLLERGKQKILMINAYMYKSVAKMRYLGYKRALEESGLQPYFMVEIEEGYESCFNKILELKNMSYDAVFCFNDVFAIAALKALKALNKRVPQDVAVVGYDDISYASFVNPSLTTVRIDKYKEGMIAFDLLHERLTEKRTEPAQIVLDVELIERESS
Thermotogae	Thermotogales	746	7198	GalR	TM1200	Q9X0S7_THEMA	U	*	Thermotoga maritima MSB8	243274	Galactosides utilization	Galactose	MKKKYVTIRDIAEKAGVSINTVSRALNNKPDISEETRRKILKIAQELGYVKNATASSLRSKQTNIVGVIIADSANPFYAEVLKGIEAASRKYGYQIMLMNTERIYENEEKAIEVLLQRRVDGLLITPVQDRSDDIKTLIERKVPFVIVGRHFEELEVDEIHSDEVKGGYLATRHLIERGRKNIIMISGYLFKSAAYMRLEGYRKALKEYGIPFSEKMIIETDIDIESGYRAMREAIEKGLEFEAVFCYNDLLAFGVIKALKECGYRIPEDVAVVGYDDIVYSSFICPSLTTVRIKKFEMGFEAFRMLLQRLKGRRKKRKRVILDVELVVRESG
Thermotogae	Thermotogales	746	7202	GalR	Tnap_1576	D2C4J7_THENR	U		Thermotoga naphthophila RKU-10	590168	Galactosides utilization	Galactose	MKKKYVTIRDIAKRAGVSINTVSRALNNKPDISEETKRKILKIARELGYVKNATASSLRSKQTNIVGVIIADSANPFYAEVLKGIEAASRKYGYQIMLMNTERVYENEEKAIEVLLQRRVDGLLITPVQDRSDDIKALIEIKVPFVIVGRHFEELEVDEIHSDEVKGGYLATRHLIKRGRKNILVITGYLFKSAAYMRLEGYKKALKEYGIPFREELIIETDIDIESGYQAMREAIEKGLEFDAVFCYNDLLAFGAMKALKERGYRIPEDVAVVGYDDIVYSSFVCPSLTTVRIKKFEMGYEAFRMLLQRLKGRRKKRKRVILDVELVVRESG
Thermotogae	Thermotogales	746	7200	GalR	CTN_1371	B9K9B4_THENN	U		Thermotoga neapolitana DSM 4359	309803	Galactosides utilization	Galactose	MGGNSMKKKYVTIRDIAEKAGVSINTVSRALNNKPDISEETKKRILEIARELGYVKNATASSLRSKRTNIVGVIIADSANPFYAEVLKGIEVASRKYGYQIILMNTERIYENEEKAIDVLLQRRVDGLLITPVQDRSDDIEFLIERKVPFVVVGRHFEGLEVDEIHSDEVKGGYLATKHLIDRGRRNILMISGYLFKSAAYMRLEGYKKALKEHGIPFKEEMVIVTDIDIESGYQAMNEAIEKGLHFDAVFCYNDLLAFGAMKALKEHGYRIPEDVAVVGYDDIVYSSFVCPPLTTVRIKKFEMGFEAFRMLLQRMKGRRKKRKRVILDVELVVRESS
Thermotogae	Thermotogales	746	7201	GalR	Tpet_1556	A5IMZ0_THEP1	U		Thermotoga petrophila RKU-1	390874	Galactosides utilization	Galactose	MKKKYVTIRDIAEKAGVSINTVSRALNNKPDISEETRRKILKIAQELGYVKNATASSLRSKQTNIVGVIIADSANPFYAEVLKGIEAASRKYGYQIMLMNTERIYENEEKAIEVLLQRRVDGLLITPVQDKSDDIRALIERKVPFVIVGRHFEELEVDEIHSDEVKGGYLATRHLIERGRKNIIMISGYLFKSAAYMRLEGYRKALKEYGIPFSEKMIIETDIDIESGYRAMREAIEKGLEFDAVFCYNDLLAFGVIKALKECGYRIPEDVAVVGYDDIVYSSFVCPSLTTVRIKKFEMGYEAFRMLLQRLKGRRKKRKRVILDVELVVRESG
Thermotogae	Thermotogales	746	7199	GalR	TRQ2_1618	B1LCP5_THESQ	U		Thermotoga sp. RQ2	126740	Galactosides utilization	Galactose	MKKKYVTIRDIAEKAGVSINTVSRALNNKPDISEETRRKILKIAQELGYVKNATASSLRSKQTNIVGVIIADSANPFYAEVLKGIEAASRKYGYQIMLMNTERIYENEEKAIEVLLQRRVDGLLITPVQDKSDDIRALIERKVPFVIVGRHFEELEVDEIHSDEVKGGYLATRHLIERGRKNIIMISGYLFKSAAYMRLEGYRKALKEYGIPFSEKMIIETDIDIESGYRAMREAIEKGLEFDAVFCYNDLLAFGVIKALKECGYRIPEDVAVVGYDDIVYSSFVCPSLTTVRIKKFEMGFEAFRMLLQRLKGRRKRRKRVILDVELVVRESG
Proteobacteria/Gamma	Vibrionales	5261	51815	GalR	PBPRA2078	Q6LQE6_PHOPR	U		Photobacterium profundum SS9	298386	Alpha-galactosides utilization, Galactose utilization, Lactose utilization	Galactose	MATIKDVAKEAGVSVATVSRVINKSPKASKSAIDAVSTAMRKLGYRPNANARALVSRSTNTLGVLVGDVSDPFFGSMVKSIDGVARNNGKHILIGNGYHDADTERDAIELLINSRCESLVIHSKGLSNEELIAYAKEVPGLVLINRYIPEIAEKCIALDNHKGSYLATEYLIRHGHQHIGYVCSNHQIEDAEQRKAGYQEALKAHGLHQPESYIEYGSPDEQGGEQAMTNLLAKNLPITAIAAYNDYMAAGSLSILEENGIQAPENMSLIGFDDGLIAKYLHPKLTTIRYPIQMMAEHAAQLSLKLANKNQPIEPEKTDTDTHMFIPTLVRRLSVDKVKS
Proteobacteria/Gamma	Vibrionales	5261	51816	GalR	VAS14_15144	Q1ZTU6_PHOAS	U		Vibrio angustum S14	314292	Alpha-galactosides utilization, Galactose utilization, Lactose utilization	Galactose	MATIKDVAREAGVSIATVSRVINKSPKASKQSIEAVTNAMKKLGYRPNAAAKALVRQNTDTIGVLVGDVSDPFFGTLVKAVDVVAHQHGKHILIGNGYHNADDERRAIEHLINSRCDALVIHAKALTDEELINYANEVKGLVIINRHISAIAERCISLDNHKGAYLATEYLIRHGHSHIACIASNHDIEDASERVQGYLDALADNNISLSASYIEKATPDSEGGETAMINLITKSLPMTALVAYNDYMAAGALAVLQENGIQSPQKMSLVGFDDGLIARYTTPGLTTVRYPIQMMAEKAANLALALADEQDVDNEAMRFSPTLVRRGSVERLVSE
Proteobacteria/Gamma	Vibrionales	5261	51817	GalR	VC2337	Q9KPM9_VIBCH	U	*	Vibrio cholerae O1 biovar eltor str. N16961	243277	Alpha-galactosides utilization, Galactose utilization, Lactose utilization	Galactose	MATIKDVAREAGVSVATVSRVINKSPKASQASIDTVTSAMHKLGYRPNAAARALVNQSTNTIGVLVSDVSDPFFGTLVKAVDTVAHREGKHLLIGNGYHRAEEERRALELLINSRCDALVIHSKALPNEELIEYANEVKTLVLINRHIPQLADRCISLDNQKGAYLATDFLIRQGHRNIACISSSHQIEDADQRIAGYQQALNEHGITLSSSYIEKASPDSEGGEQAMTNLLVKSLPFTAVVAYNDNMAAGALLVLEENGHSVPEHVSVIGFDDALISRYLRPRLTTVRYPIQLMAEKATQLALALATDAPRENDPMIFSPTIVRRDSVAQKREP
Proteobacteria/Gamma	Vibrionales	5261	51818	GalR	VF_A0361	Q5E0L5_VIBF1	U		Vibrio fischeri ES114	312309	Alpha-galactosides utilization, Galactose utilization, Lactose utilization	Galactose	MATIKDVAKEAGVSVATVSRVVNKSPKASKAAIKSVNAAMTKLGYRPNANARALVSKSTNTIGVLVADVSDPFFGSLIKAVDGVARANNKHLLIGNGYHNAEVEKEAIELLIHNRCESLIIHSKGLSDEELIQFSQEVPGLVIINRHIPQIAHKCIYLDNQLGSRLATEHLIESGHQHLAYINSNQQIDDCIDRKHGFAQALEKHGLIINSSLLSEGEPTDEGGENAMNELIKNKQSFTGVVCYNDYMAAGAIAALEKAGISVPEQVSIIGFDNGLIAKYLHPKLTTIDYPISEMASQAALLSLLLAKDEKPETEKKVYTPTLVKRNSVHTL
Proteobacteria/Gamma	Vibrionales	5261	51819	GalR	VIBHAR_03325	A7MUZ8_VIBCB	U		Vibrio harveyi ATCC BAA-1116	338187	Alpha-galactosides utilization, Galactose utilization, Lactose utilization	Galactose	MATIKDVAKEAGVSVATVSRVINKSPKASQSSIDAVTQAMSKLGYRPNAAARALVSQSTNTMGVLVGDVSDPFFGTLVKSVDNVARENGKHILIGNGYHNPEDERQALELLINSRCEAIVIHSKGLSDEELIGYAKEVKGMVLINRHIPELAERCISLDNRKGAYLATEYLIRHGHTKIACIASSHDIEDTDERLQGYQAALKDHDIELSKSYVEYGEPNSDGGETAMTNLLTKSLAITGVVAYNDYMAAGALAALDQNGIDVPEKVSMVGFDDGLIARFVNPSLTTIRYPIEMMAERAARLALALSRDEQVEDDTIIFSPTLVRRNSVDRL
Proteobacteria/Gamma	Vibrionales	5261	51820	GalR	VP2393	Q87M65_VIBPA	U		Vibrio parahaemolyticus RIMD 2210633	223926	Alpha-galactosides utilization, Galactose utilization, Lactose utilization	Galactose	MATIKDVAKEAGVSVATVSRVINKSPKASQSSVESVTKAMRKLGYRPNAAARALVSQSTNTMGVLVSDVSDPFFGTLVKSVDNVARENGKHILIGNGYHNPEDERQALELLINSRCDAIVIHSKGLSDEELIGYAQEVKGMVLINRHIPELAERCISLDNRKGAFLATEYLIRHGHRKIACIASSHDIEDTDERLQGYQAALKEHGIELSKSYIEYGEPNSDGGEVAMTNLLTKSLEITGVVAYNDYMAAGALAALDQNGIDVPSKVSMVGFDDGLIARFVHPSLTTIRYPIEMMAERAARLALALSRDEKVEDETIIFSPTLVRRNSVERC
Proteobacteria/Gamma	Vibrionales	5261	51822	GalR	VSAK1_10693	A6D1Y6_9VIBR	U		Vibrio shilonii AK1	391591	Alpha-galactosides utilization, Galactose utilization, Lactose utilization	Galactose	MATIKDVAKEAGVSVATVSRVINKSPKASAASIESVTSAMKKLGYRPNANARALVSQSTNTVGVLVSDVSDPFFGTMVKAVDKVAHQHGKHILVGNGYHDAEEERKAIELLINSRCDALVIHSKALSDEELIQYAEEVKGLVYINRDIPQLPGRCISLDNYKGAYIATEHLIRNGHTNIACVASSHNIEDVDQRLEGYRDALKANNIKLSASYIEYGSPDSDGGEIAMTNLLTKSLPITAVVAYNDNMAAGSLSVLEENQYALPNQMSIIGFDDGLIAKYLHPKLTTIRYPIQMMAEKAAQIALALSKSESVETDPMIYSPTLVQRASVARKN
Proteobacteria/Gamma	Vibrionales	5261	51822	GalR	VSAK1_00922	A6D1E5_9VIBR	U		Vibrio shilonii AK1	391591	Alpha-galactosides utilization, Galactose utilization, Lactose utilization	Galactose	MATIKEVAKEAGVSIATTSRVINNAPHTSEAAIVAVQAAMKKLGYRPNANARALVSKSSNTVGILVHDVSAPFFGAMVKAIDTIAAEQGKQILIGSGYHDPVKERNAINLLISSRCESLVIHSKGLSDEELTELADEIPGMMLINRSVPAIADRCIALDNFKGSYLATEFLIKNGHEKIGYIASSHDIDDAHDRRDGYLAALKDHNIEPNEEFIEYGEPDEIGGEQAMVNLLAKNLSITAVATYNDDMAAGCLALIQENGIRIPEDMSVIGFDDGLIARFIYPRLTTIRYPIQVMAKQAVLEALQRASGKDVERAQNLFAPILVKRSSVSRR
Proteobacteria/Gamma	Vibrionales	5261	51824	GalR	VV1_1775	Q8DBN6_VIBVU	U		Vibrio vulnificus CMCP6	216895	Alpha-galactosides utilization, Galactose utilization, Lactose utilization	Galactose	MATIKDVAREAGVSIATVSRVINKSPKASKASIESVTQAMAKLGYRPNAAAKALVSQSTNTMGVLVGDVSDPFFGTLIKAVDEVAHENGKHLLIGNGYHNAEEERRAIELLINSRCDALVIHSKGLSDEELLSYAQEVPSLVIINRHIPKIAQRCISLDNYKGAYLATEYLIRHGHQHIACISSSHKIEDADARIAGYLAALRDNHIELSSAYIEQGEPNSDGGETAMTNLLTKSLPITGVVAYNDYMAAGALSVLDENGLKVPEQVSMIGFDDGLIARYVSPRLTTVRYPIQMMAEKAARLAIDLARQQEADHSTMIFSPTLVRRDSVAKLS
Proteobacteria/Gamma	Vibrionales	5261	51824	GalR	VV21323	Q8D4H6_VIBVU	U		Vibrio vulnificus CMCP6	216895	Alpha-galactosides utilization, Galactose utilization, Lactose utilization	Galactose	MATIKDVAKLAGVSIATASRVINNAPHTSEAAIVAVKEAMQSLGYRPNANARALVSKSSNTIGVLVNDVSAPFFGTMVKAIDTVACEQGKQLLIGSGYHDANKERNAIELLINSRCESLVVHSKGMSDQELVSLADEIPAMVVINRVVKGIESRCIALDNHRGSYLATEFLIRSGHKHIGYICSSHNIDDAKDRLAGYQDALRDNGIEIRDEYIEYGEPDETGGEQAMISIMAKNLPITALATYNDYMAAGCLSLLLENGIRIPEEMSLIGFDDGHVARYIYPRLTTVRYPIQVMANEAVKMSLQLANGEVPERKEHKLFLPMLIRRASVGAPAK
Proteobacteria/Gamma	Enterobacteriales	1123	10215	GalR/GalS	CKO_00640	A8AE81_CITK8	U		Citrobacter koseri ATCC BAA-895	290338	Galactose utilization	Galactose	MVTIRDVARQAGVSVATVSRVLNNSALVSPDTREAVMKAVTLLGYRPNANAQALATQISDTIGVVVMDVSDAFFGALVKAVDVVAQQHNKYVLIGNSYHEAEKERHAIEVLIRQRCNALIVHSKALSDQELGAFMDQIPGMVLINRIVPGYAHRCVCLDNISGAKMATRMLLNNGHQRIGYLASSHRIEDDTMRKEGWLSALQEQGITPPESWIGTGSPDMQGGEAAMVELLGRNLQLTAVFAYNDSMAAGALTALKDNGIAIPLHLSIIGFDDIPIARYTDPQLTTVRYPIASMAKMATELALQGAAGTLDSTATHCFMPTLVRRHSVALRQNAAPITNQQRQGM
Proteobacteria/Gamma	Enterobacteriales	1123	10215	GalR/GalS	CKO_04211	A8AP58_CITK8	U		Citrobacter koseri ATCC BAA-895	290338	Galactose utilization	Galactose	MATIKDVARLAGVSVATVSRVINDSPKASEASRLAVTSAMESLSYHPNANARALAQQSTETIGLVVGDVSDPFFGAMVKAVEQVAYHTGNFLLIGNGYHNEQKEHQAIEQLIRHRCAALVVHAKMIPDADLASLMKQMPGMVLINRILPGFEQRCVALDDRYGAWLATRHLIQQGHTRIGYICSNHSISDAEDRLKGYYDALEESHIPANDRLVTFGEPDESGGEQAMTELLGRGRNFTAIACYNDSMAAGAMGVLNDNGIDVPGEISLIGFDDVLVSRYVRPRLTTVRYPIVTMATQAAELALALAEKRPVPEITHVFSPTLVRRHSVSTPSETGNSSSND
Proteobacteria/Gamma	Enterobacteriales	1123	10216	GalR/GalS	ETAE_2890	D0ZDU4_EDWTE	U		Edwardsiella tarda EIB202	498217	Galactose utilization	Galactose	MATIKDVARLAGVSVATVSRVINNSPKASEGSRAAVHAAMAQLRYHPNANARALAQQSTETLGLVVCDVSDPFFGAMVKAVEQVAYATGNFLLIGNGYHEQHKERQAIEQLIRHRCAALVVHAKTIPDDELAALMQQIPGMVLINRTLPGYEQRCVALDDRYGGWLATRHLIQQGHRRIACICSNHAISDAHDRLQGYLEAMRQHDLPIDERLIVHASPDELGGEQAMTELLGHGRKFSAVTCYNDPMAAGALSVLNDNGIEVPGAVSLIGFDDVLISRYLRPRLTTIRYPVVAMATQAAELALALAAGKTPPETTNMFSPTLVCRHSVSPLRTL
Proteobacteria/Gamma	Enterobacteriales	1123	10217	GalR/GalS	Ent638_2751	A4WCI6_ENT38	U		Enterobacter sp. 638	399742	Galactose utilization	Galactose	MITIRDVARIAGVSVATVSRVLNNSALVSPETRENVMKAVTQLGYRPNANAQALATQVSDTIGVVVMDVSDAFFGALVKAVDVVAQQHNKYVLIGNSYHEAEKERHAIEVLIRQRCNALIVHSKALSDEELAGFMDQIDGMVLINRVVPGYAHRCVALDNVSGAMMATRMLLNNGHQRIGYLASSHHIEDDDMRREGWQNALKEAGIIPLDSWIGTGSPDMQGGEAAMVELLGRNLQLTAVFAYNDSMAAGALTALKDNGIAVPQHLSLIGFDDIPIARYTDPQLTTVRYPIASMARLATELALQGAAGQLDPSATHCFMPTLVRRHSVAIRQIVAPITN
Proteobacteria/Gamma	Enterobacteriales	1123	10217	GalR/GalS	Ent638_3278	A4WE12_ENT38	U		Enterobacter sp. 638	399742	Galactose utilization	Galactose	MATIKDVARLSGVSVATVSRVINDSPKASDASRQAVQSAMETLNYHPNANARALAQQSTETVGLVVGDVSDPFFGAMVKAVEQVAYQTGNFLLIGNGYHNEEKERKAIEQLIRHRCAALVVHAKVLPDAELLHLMKQIPGMVLINRIIPGYEQRCVALDDRYGAWLATRHLIQQGHTRIGYLCSNHQISDAEDRLRGYYDALRESGLPCNDRLVAYGEPDESGGEHAMTELLGRGRNFTAVASYNDSMAAGAMGVLNDNGIDVPAEISLIGFDDVLVARYVRPRLTTVRYPIVTMATQAAELALALADKRPLPDITHLFSPTLVRRHSVVSPAEPVSE
Proteobacteria/Gamma	Enterobacteriales	1123	10218	GalR/GalS	EAM_2770	D4IA96_ERWAE	U		Erwinia amylovora ATCC 49946	716540	Galactose utilization	Galactose	MATIKDVARLAGVSVATVSRVINHSPKASESSRLAVTSAMASLQYHPNANARALAQQSTETIGLAVGDVSDPFFGAMVKSVDEVAWQTGNFLLIGNGYHDEQKERQAIEQLIRHRCAALVVHAKKIPDDELQSLMRQIPGMVLLNRVLPGFETRCIALNDRYGCWLATRYLIRQGHQNIAFICSNHAISDATDRLQGYHDALRQHHLPCSDRLVAFGEPDEVGGEQAMTELLGQGKTFSAVACYNDSMAAGALAVLNDNGVRVPEEMSLTGFDDVLVARYVRPRLTTIRYPVVQMAKQAALLALALAHGQPLPEVTNLFSPTLVRRHSVAAPSG
Proteobacteria/Gamma	Enterobacteriales	1123	10218	GalR/GalS	EAM_2208	D4I6X6_ERWAE	U		Erwinia amylovora ATCC 49946	716540	Galactose utilization	Galactose	MLTIRDVAREAGVSVATVSRVLNNSSVVTADTRTRVMKTIERLGYRPDANAQALANRLSDTIGVVVMDVSDPFFGALIKAVDAVARSMQMQVLINNAWHQADKERHAIEVLIRQRCHALIVHAKALCDRELAALMQQVPGMVLINRVVPGFAHRCVYLDNVSGALMAMHMLQQHGHQRIAYLGSSHAIEDNAQRRAGWHQALGEQGITPPDSWCAGGEPDLQGGELAMVELLGRNLQLTAVFAYNDSMAAGALAALKDNAIAVPQQLSLVGFDDIPFARYTDPQLSTMRYPIASMAKLATELALKAAAGQLDPQESHCFMPTLVRRHSVAVRQTVAVVTNLGDGGL
Proteobacteria/Gamma	Enterobacteriales	1123	10219	GalR/GalS	ECA3172	Q6D2C4_PECAS	U		Erwinia carotovora subsp. atroseptica SCRI1043	218491	Galactose utilization	Galactose	MATIKDVARLSGVSVATVSRVINNSPKASTASREAVHKAMEELRYHPNANARALAHQSAETMGLVVADVSDPFFGTMVKSVEQIAQATGNFLLIGNGYHNAEQEKKAIEQLIRHRCAGLIVHAKMLSDEELAALMSHIPDMVLINRTLPGYENRCVALDDRYGSWLATRHLIQEGHQKIGFLCSNHQISDSVDRLQGYMDALQEHGIARDERLIARASPDELGGEAAMMELLSRGGNMTAVVCYNDSMAAGALSVLSDNSINVPQDMSVIGFDDVLIARYLRPRLTTVHYPVSAMAIQAAELAIALSHGKQLNETTNMFSPTLVRRHSVSPPISKK
Proteobacteria/Gamma	Enterobacteriales	1123	10220	GalR/GalS	b2837	U6NCI4_ECOLI	U	*	Escherichia coli str. K-12 substr. MG1655	511145	Galactose utilization	Galactose	MATIKDVARLAGVSVATVSRVINNSPKASEASRLAVHSAMESLSYHPNANARALAQQTTETVGLVVGDVSDPFFGAMVKAVEQVAYHTGNFLLIGNGYHNEQKERQAIEQLIRHRCAALVVHAKMIPDADLASLMKQMPGMVLINRILPGFENRCIALDDRYGAWLATRHLIQQGHTRIGYLCSNHSISDAEDRLQGYYDALAESGIAANDRLVTFGEPDESGGEQAMTELLGRGRNFTAVACYNDSMAAGAMGVLNDNGIDVPGEISLIGFDDVLVSRYVRPRLTTVRYPIVTMATQAAELALALADNRPLPEITNVFSPTLVRRHSVSTPSLEASHHATSD
Proteobacteria/Gamma	Enterobacteriales	1123	10220	GalR/GalS	b2151	U6N7L4_ECOLI	U		Escherichia coli str. K-12 substr. MG1655	511145	Galactose utilization	Galactose	MITIRDVARQAGVSVATVSRVLNNSTLVSADTREAVMKAVSELDYRPNANAQALATQVSDTIGVVVMDVSDAFFGALVKAVDLVAQQHQKYVLIGNSYHEAEKERHAIEVLIRQRCNALIVHSKALSDDELAQFMDNIPGMVLINRVVPGYAHRCVCLDNLSGARMATRMLLNNGHQRIGYLSSSHGIEDDAMRKAGWMSALKEQDIIPPESWIGAGTPDMPGGEAAMVELLGRNLQLTAVFAYNDNMAAGALTALKDNGIAIPLHLSIIGFDDIPIARYTDPQLTTVRYPIASMAKLATELALQGAAGNIDPRASHCFMPTLVRRHSVATRQNAAAITNSTNQAM
Proteobacteria/Gamma	Enterobacteriales	1123	10221	GalR/GalS	KPN_03246	A6TDH3_KLEP7	U		Klebsiella pneumoniae subsp. pneumoniae MGH 78578	272620	Galactose utilization	Galactose	MATIKDVARLAGVSVATVSRVINNSPKASEASRQSVGAAMETLNYHPNANARALAQQSTETVGLVVGDVSDPFFGAMVKAVEQVAYRTGNFLLIGNGYHNVQKERQAIEQLIRHRCAALVVHAKMIPDEELAGLMKQIPGMVLINRILPGYETRCVALDDRYGAWLATRHLIQQGHTRIGYLCSNHDISDAEDRLQGYYAALEESGLPCNDRLVTFAEPDESGGEQAMTELLGRGRHFSAVACYNDSMAAGAMGVLNDNGIDVPREISLIGFDDVLISRYVRPRLTTVRYPIVTMATQAAELALALAEQRPAPEITHLFSPTLVRRHSVVAPQEGDKS
Proteobacteria/Gamma	Enterobacteriales	1123	10221	GalR/GalS	KPN_02589	A6TBN6_KLEP7	U		Klebsiella pneumoniae subsp. pneumoniae MGH 78578	272620	Galactose utilization	Galactose	MITIRDVARQAGVSVATVSRVLNNSALVSPDTRDVVMKAVTQLGYRPNANAQALATQVSDTIGVVVMDVSDAFFGALVKAVDTVAQQHQKYVLIGNSYHEAEKERHAIEVLIRQRCSALIVHSKALSDDELSDFMQHIPGMVLINRIVPGYAHRCVGLDNVSGALMATRMLLNHGHQRIGYLSSNHGIEDDDMRREGWSKALQEQGIIAPDSWIGSGSPDMQGGEAAMVELLGRNLGLTAVFAYNDSMAAGALTTLKDNGIVVPQHLSLIGFDDIPISRYTDPQLTTVRYPVMSMAKLATELALLGAAGKLDREATHCFMPTLVRRHSVAQRQTVGPITN
Proteobacteria/Gamma	Enterobacteriales	1123	10223	GalR/GalS	PMI1947	B4F0A4_PROMH	U		Proteus mirabilis HI4320	529507	Galactose utilization	Galactose	MATIKDVAKEAGVSVATVSRVINNSPKASRASIEIVNSAMQKLGYRPNAAARALVSQSTQTLGVLVHDVSDPFFGTLVKAVDNIARKAGKHILVCNGYHDAQDERQSIELLINSRCDGLVIHSKALSDEELLAYANEVNSMVLINRFIPEIAERCVALDNYKGAWIATEHLIRQGHTQIAYISSTHHIEDTSQRLAGYKAALAAYNISLPESYVEYGEPEGEGGEQAMMRLLTKSIDFTAVVTYNDFMAAGALSVLDENEIPVPEKISVIGFDDVLIARYIHPRLTTVRYPIHMMAEQAATLALKLSQGEVLTQKQRIYSPTLVQRNSVYNLSHLS
Proteobacteria/Gamma	Enterobacteriales	1123	10224	GalR/GalS	STM3011	GALR_SALTY	R		Salmonella typhimurium LT2	99287	Galactose utilization	Galactose	MATIKDVARLAGVSVATVSRVINDSPKASEASRLAVTSAMESLSYHPNANARALAQQATETLGLVVGDVSDPFFGAMVKAVEQVAYHTGNFLLIGNGYHNEQKERQAIEQLIRHRCAALVVHAKMIPDADLASLMKQIPGMVLINRILPGLEHRCVALDDRYGAWLATRHLIQQGHTRIGYICSNHTISDAEDRLRGYYDALAESHIPANDRLVTFGEPDESGGEQAMTELLGRGRNFTAVACYNDSMAAGAMGVLNDNGVGVPGEVSLIGFDDVLVSRYVRPRLTTIRYPIVTMATQAAELALALAGKCPTPEVTHVFSPTLVRRHSVSTPTDTGHLSTTD
Proteobacteria/Gamma	Enterobacteriales	1123	10224	GalR/GalS	STM2191	GALS_SALTY	R		Salmonella typhimurium LT2	99287	Galactose utilization	Galactose	MITIRDVARQAGVSVATVSRVLNNSALVSPDTRDAVMQAVTLLGYRPNANAQALATQVSDTIGVVVMDVSDAFFGALVKAVDLVAQQHQKYVLIGNSYHEAEKERHAIEVLIRQRCNALIVHSKALTDRELSDFMDQIPGMVLINRIVPGYAHRCVCLDNVSGARMATRMLLNNGHQRIGYLASSHRIEDDAMRREGWLHALQEQGIAASESWIGTGTPDMQGGESAMVELLGRNLQLTAVFAYNDNMAAGALTALKDNGIAIPLHLSVIGFDDIPIARYTDPQLTTVRYPIASMAKIATELALQGAAGTLDITATHCFMPTLVRRHSVAWRQNAVLITN
Proteobacteria/Gamma	Enterobacteriales	1123	10225	GalR/GalS	Spro_3832	A8GII8_SERP5	U		Serratia proteamaculans 568	399741	Galactose utilization	Galactose	MATIKDVARLAGVSVATVSRVINHSPKASESSRTAVLAAMEQLQYHPNANARALAQQSTETLGLIVSDVSDPFFGAMVKAVEQVAYATHNFLLIGNGYHEAEKERQAIEQLVRHRCAALVVHAKKLTDPELSGWMQQIPGMVLINRTLPGFESRCVALDDRYGAWLATRHLIQQGHQRIAIVCSTHQISDAADRLQGYLDALQEHGIAVDERLIAYGEPDEIGGEQAMTELLGRGKNFTAVTCYNDSMAAGALSVLSDNSVDVPGQMSLIGFDDVLISRYLRPRLTTIRYPVVAMATQAAELALALANNQPLPEITNMFSPTLVRRHSVASINNVYEQN
Proteobacteria/Gamma	Enterobacteriales	1123	10225	GalR/GalS	Spro_1562	A8GC26_SERP5	U		Serratia proteamaculans 568	399741	Galactose utilization	Galactose	MTSVHPTTIRDVAKRAGVSVATVSRVLNHSALTSKETREQVLKAVAELGYRPNANAQALATQSSDTLGVVVMDVSDPFFGALVKAVDTVAQQHHKYLLIGNSYHQADKERHAIEVLIRQRCNALIVHAKALCDAELMTFLDQVPGMVLINRIIAGYEHRCVGLDNVSGAEMAMRLLLSQGHQRIGYLGSNHPIEDGPLRQQGYTQAMAAAGLVTPDNWRAYGSPDLQGGEAAMVELLGRNLHLSAVFAYNDAMAAGAMAVLKENAITVPQNFSLVGFDDIPIARYTSPKLTTVRYPIVTMATLATELALLGAAGRLEPQDRHLFMPTLVRRHSVAPWQIEAAVTL
Proteobacteria/Gamma	Enterobacteriales	1123	10226	GalR/GalS	y3183	Q8CZX9_YERPE	U		Yersinia pestis KIM	187410	Galactose utilization	Galactose	MRVILFSAKLSDVSGYPRISGTKMATIKDVAKLAGVSVATVSRVINHSPKASEASRVAVCKAMEQLQYHPNANARALAQQSTETVGMIVSDVSDPFFGAMVKAVEQVAYATGNFLLIGNGYHDAEKERQAIEQLIRHRCAALVVHAKKLPDDELTSLMEQIPGMVLINRTLPGFEPRCIALDDRYGAWLATRHLIQQGHKRVAFICSNHQISDALDRMQGYLDALKEFDIPVDERLITYGTPDELGGEQAMTDLLGRGKHFTAVSCYNDSMAAGALSVLSDNSIDVPQEISLIGFDDVLISRYLRPRLTTIRYPVVAMSTQAAELALALANNTPLPEITNMFSPTLVRRHSVASPPSLRDDTD
Firmicutes	Bacillales	776	7536	GanR	ABC3521	Q5WC56_BACSK	U		Bacillus clausii KSM-K16	66692	Galactan utilization	Beta-galactosides	MATIKEIAEKAGVSITTVSRVLKQDPTLSVTQETREKVYETAQRLGYTKKRFKHSLKKIAFLYWITEKEDLQDVYFQTVKKGVEEEANERQLNLTTYSIGDGIEAIDPQTKGVICLGRFSKRELDYIRTLTNDVVFIDTSPDEDHFDSVRPHLRRMIERMIDYYLENGHTAIGYIGGNDFDADCGGYIPDRRERAFKEYMEKKGLFDERFLFVGDQYAVNEGYALMKRAIHSLGDQLPTAFCVASDSLAVGCLQALNEERIALPERVNVFSINDASIAQYVSPPLTTFRIDVKLLCQTAIDLLLERLVDKRTSPKTVLMSCNPIFRKSTG
Firmicutes	Bacillales	776	7535	GanR	BH2018	Q9KBB0_BACHD	U		Bacillus halodurans C-125	272558	Galactan utilization	Beta-galactosides	MATIKDVAEMSGYSISTVSRVLNNDQNLSVTEETREKIYEVADKLNYRKKTVRALVKNVAFLYWLTDKEELEDVYFKTMRLEIEKLAKAFNVELETYKISDGIEKIPDSIEGFIAVGTFSDEELAYLRKKTTNGVFIDSTPDPNHFDSVRPDLAQMTKQAIDFLIMKGHQQIGLIGGTYHNPNTDMDEMDIRERAFRQYLDEKQRLKEGFIFCRRGFSVDNGYHLMKQAIETLGDDLPTAFFVAGDPIAVGCLQALNEKGIAIPNRVSIISINNISIAKYVSPPLTTFHIDIEELCNNAIKLLLERLVDKRKSVKTLYIGAELVIRKSTN
Firmicutes	Bacillales	776	7531	GanR	BLi04281	Q65CX0_BACLD	U		Bacillus licheniformis DSM 13	279010	Galactan utilization	Beta-galactosides	MATIKDVAEKAGYSISTVSRVLNNDESLSVPDETREKIFEVAESLNYRKKTIRTLVKNIAFLYWLTDKEELEDVYFKTMRLEIEKLAKQFNVELATYKISGGIDAIPENIEGFIAVGSFSDDELIRLRQMTPHGVFIDSTPDPNHFDSVRPDLKQMTRKTVDFLIEKGHEKIGFIGGTYHNPNTDEDEMDVRERTFREYMKEKGLLEESFIFCRRGFSVENGYHLMDKAVETLGEKLPTAFFTAADPIAVGCLQALNEKGIAIPGRVSIISINNISVAKYVSPPLTTFHIDIKELCKNAIELLLEQILQKRKAVKTLYIGAELVVRKSTN
Firmicutes	Bacillales	776	7530	GanR	BPUM_3612	A8FJ39_BACP2	U		Bacillus pumilus SAFR-032	315750	Galactan utilization	Beta-galactosides	MAAKIKDIAEKAGLSIATVSRVLNQDPNLSVTDQTREKVYAAAEALSYQKKTFKHSLKKIAFLYWMTEKEELEDIYFKSIRLGIEELTNTRSLNVTAYNPSDGLQSIDPSTEGIIAIGRFKKSELDQLYAITQHIVFIDTSPNEDRFDSVKPNLKRIVEKIIDSFIEKEHTSIGFVGGTDLDLNTNMHIPDIRETTFRDYMKAHNVLDERLVYVGHHFSVDEGYALMMKAIDELGDDLPSAFCVASDPLAIGCLQALNERGFPLPNRVSVFSINDIHVSQYVSPPLTTYHIHTSLLCETAIDLLLERLVDGRTLPKTVLIASEPVFRKSTI
Firmicutes	Bacillales	776	7528	GanR	BSU34170	GANR_BACSU	R	*	Bacillus subtilis subsp. subtilis str. 168	224308	Galactan utilization	Beta-galactosides	MATIKDIAQEAGFSISTVSRVLNNDESLSVPDETREKIYEAAEKLNYRKKTVRPLVKHIAFLYWLTDKEELEDVYFKTMRLEVEKLAKAFNVDMTTYKIADGIESIPEHTEGFIAVGTFSDEELAFLRNLTENGVFIDSTPDPDHFDSVRPDLAQMTRKTVNILTEKGHKSIGFIGGTYKNPNTNQDEMDIREQTFRSYMREKAMLDERYIFCHRGFSVENGYRLMSAAIDTLGDQLPTAFMIAADPIAVGCLQALNEKGIAIPNRVSIVSINNISFAKYVSPPLTTFHIDIHELCKNAVQLLLEQVQDKRRTVKTLYVGAELIVRKSMN
Proteobacteria/Alpha	Rhodobacterales	5568	54569	GapR	Jann_0311	Q28VN4_JANSC	U	*	Jannaschia sp. CCS1	290400	Central carbohydrate metabolism	null	MRGRNPFDGKPQMTLRDVADAASVSEMTVSRVLRNRGDVSDKTRERVFEAARTLGYVPNKIAGALASNRVNLVGVVIPSLSNMVFPDVLHGIGAALDGTELQPVVGTSKYDLQQEEKVIYEMLSWRPSGLIVAGLEHTDSARAMMRNAGVPVVEVMDVDGDPVAAAVGISHQAAGRAMADEILARGYTNIGYLGSSSTADARAQKRFRGFEAGMAEAGVTLADTIFYEGTSGFGTGRKMTQALLERTPDIDFLYYNTDMNAAGGLLYCLEKGMDIPGEIGLAGFNSFEVLDGLPMRIATMDSQREAIGRRAAELMIANELTEEVVQLEPQFLPGDTVRDR
Proteobacteria/Alpha	Rhodobacterales	5568	54570	GapR	SKA53_12393	A3V2Q3_9RHOB	U		Loktanella vestfoldensis SKA53	314232	Central carbohydrate metabolism	null	MPLTSDHKRPLTLRDVSEASGVSEMTVSRVLRNKGDVSAATRQKVQDAAKRLGYVPNKIAGALASSRVNLVAVIIPSLGNMVFPEVLAGISEVLEDTDLQPVVGVTDYLPEKEEKVLFEMLSWRPSGVIIAGLEHSEASRAMLRQSGIPVVEIMDTDGDPIDACVGISHRRAGRKMAEEIIAAGYKKIGFMGTKMPLDHRARKRFEGFTRTLAKAGIEIADQEFYSGGSALAKGREMTAKMIARSPDLDFLYYSNDMIGAGGLLYLLEQGVAIPDQIGLAAFNGVELLDGLPRQLATMDACRREIGVKAAQIIVARNQGLAREDETTVTLSPKLSPGETLRRS
Proteobacteria/Alpha	Rhodobacterales	5568	54572	GapR	OB2597_14566	A3U275_9RHOB	U		Oceanicola batsensis HTCC2597	252305	Central carbohydrate metabolism	null	MLRNRGDVSATTRARVLEAAKRLGYVPNKIAGALASQRVNLVAVIIPSLSNMVFPEVLTGISRTLEETELQPVVGVTDYQPEKEEKVLYEMLSWRPSGVIVAGLEHSDAARAMLAAAGIPVVEIMDTDGTPIDAAVGISHRRAGREMGQAILASGYRRIGFMGTRLGLDHRARKRFEGFTEALAKGGVEIEDREFYTDGSALAKGREMTKAMMERSPELDFLYYSNDMIGAGGLLWLQEQGYDVPNRIGLAGFNDVRLLQGLPTKLATMDSCRQEIGSRAAEIILGRLDTDEAPGNKVELTPRINPGDTLRAP
Proteobacteria/Alpha	Rhodobacterales	5568	54573	GapR	OG2516_09665	Q2CCX1_9RHOB	U		Oceanicola granulosus HTCC2516	314256	Central carbohydrate metabolism	null	MSEASGVSEMTVSRVLRGKGDVSEATRLKVQEAAKRLGYVPNKIAGALASSRVNLVAVVIPSLKNMVFPEVLAGVSQTLENSQLQPVVGVTDYLPEKEEKVLFEMLSWRPSGVIVAGLEHSEASRAMLARADCPVVEIMDTDGDPIDACVGISHRRAGRVMAEAILDAGYRRIGFLGTKMPLDHRARKRFEGMTRRLGKAGVEIADQEFYSGGSALAKGREMTEAMLARTPDIDFLYYSNDMIGAGGLLYLLDKGIDIPGRIGLAGFNGVELLDGLPRQLATMDACRREIGERAARIVLARHTGEQAEAEKVELSPTLSLGDTLARR
Proteobacteria/Alpha	Rhodobacterales	5568	54574	GapR	Pden_1978	A1B3H6_PARDP	U		Paracoccus denitrificans PD1222	318586	Central carbohydrate metabolism	null	MNTKRSRRPLTLRDVSEASGVSEMTVSRVLRNRGDVSAATREKVLTAARTLGYVPNKIAGGLASQRVNLVAVVIPSLSNMVFPDVLGGISAELDDTGLQPVVGVTNYSPSREDAVLYDMLSWRPSGVILAGLEHSRAARAMLDNAGLPVVEIMDVDGEPIDTAVGISHRRAGAEMADEILAAGYRRIGFIGTHMPEDHRARKRLAGFEERLGEHGLQLAAREYYQGGSSLLKGREMTERILAREPELDFLYFSNDMIGAGGLLWCMEKGYDIPGRLGLAGFNGVELLDGLPMRLTTTDARRIDIGRRAARLVAGKEPRPESGIIALAPTIMPGETIRKH
Proteobacteria/Alpha	Rhodobacterales	5568	54575	GapR	RSP_1663	Q3J5X3_RHOS4	U		Rhodobacter sphaeroides 2.4.1	272943	Central carbohydrate metabolism	null	MAKEPSSALQRRPLTLRDVSDASGVSEMTVSRVLRNRGDVSGATRERVLAAARELGYVPNRIAGALASQRVNLVAVIIPSLSNMVFPEVLTGVSEVLEDTGLQPVVGVTNYSPEREEKVLYEMLSWRPSGIIIAGLERSHAARAMLENAGIPIVEIMDVDGTPVDNAVGISHRRAGRHMAEAIVAAGYRRIGFLGTMMPYDHRARKRLEGFESALIAAGLTVEDREFYSGGSALLKGREMTETILSRSPDLDFLYYSNDLIGAGGLLWCLNHAIEVPEKVGLAGFNGVELVQGLPCHLATMDACRLEIGRKAAEIVAGKRADGAMSGLVIELEPKLEPGDTIRRR
Proteobacteria/Alpha	Rhodobacterales	5568	54576	GapR	RB2654_15484	A3VMJ6_9RHOB	U		Rhodobacterales bacterium HTCC2654	314271	Central carbohydrate metabolism	null	MADAPKRPLTLRDVSEASGVSEMTVSRVLRNRGDVSDATREKVLEAAKALGYVPNKIAGALASQRVNLVAVIIPSLSNMVFPEVMTAISDVLDDTPLQPVVGVTNYKKEREEKVLYEMLSWRPSGVIIAGLEHSEASKAMLRGAGIPVVEIMDTDGTPIDAAVGISHRRAGRMMAEAIIKAGYRKIGFLGTKMPLDHRARKRFEGFTEALAKAGMEIADQEFYEGGSALGKGREMTEAILKRTPDLDFLYFSNDMIGAGGLLYCLDNGIDVPNQLGLAGFNGVELLKGLPRTLATMDSCREEIGRKAAEIIASRVEGGIEGPQGQKIELTPTIERGHTLRRKPKDAAYPE
Proteobacteria/Alpha	Rhodobacterales	5568	54577	GapR	MED193_14932	A3X6P9_9RHOB	U		Roseobacter sp. MED193	314262	Central carbohydrate metabolism	null	MTTETKRPLTLRDVSEATGVSEMTVSRVLRNRGDVSEKTRVKVLTAAKELGYVPNKIAGALASKRVNLVAVIIPSLSNMVFPEVLTGVNQVLENTPLQPVVGVTDYQPEKEEKVLYEMLSWRPSGVIIAGLEHTEAARAMLNAAGIPVVEIMDTDGKPVDSMVGISHRRAGSEMARAILKAGYRHIGFMGTKMPLDHRARKRFEGFTEALAKEGVEIEDRAFYSGGSALAKGREMTAEMLERSPELDFLYYSNDMIGAGGLLYLLEQGIDVPGQIGLAGFNGVELLQGLPRQLATMDACRLEIGRKAAEIIASQLDDPEAAQEHHVTLTPTISFGDTLKRR
Proteobacteria/Alpha	Rhodobacterales	5568	54578	GapR	ISM_08560	A3SLV4_9RHOB	U		Roseovarius nubinhibens ISM	89187	Central carbohydrate metabolism	null	MARSDNRPLTLRDVSEASGVSEMTVSRVLRNRGDVSAATRERVLEKAKELGYVPNKIAGALASQRVNLVAVIIPSMSNMVFPEVMTGISQALDDTPLQPVVGLTDYSREKEEKVLYEMLSWRPSGVIIAGLEHSEASQAMLKASGIPVVEIMDVDGTPVDSVVGISHRRAGQKMAEAILKGGYQNIGFLGTKMPRDHRARKRFEGFTEALAKKGVEIMDREFYSGGSALAKGREMTQAMLAREPELDFLYYSNDLIGAGGLLYLLEQGVDIPGRMGLAGFNGVSLLKGLPRELATMDACRKEIGIKAAEIIARRVENPDRTEPERIVLEPTISYGDTLRRP
Proteobacteria/Alpha	Rhodobacterales	5568	54579	GapR	ROS217_09370	A3W4Z4_9RHOB	U		Roseovarius sp. 217	314264	Central carbohydrate metabolism	null	MTQHDRHPLTLRDVSEAAGVSEMTVSRVLRNKGDVSDGTRQRVLEAAKRLGYVPNKIAGALASQRVNLVAVIIPSMSNMVFPEVMTGISAVLEETDLQPVVGLTGYRPEKEEKVLYEMLSWRPSGVIIAGLEHSDASRAMLRASGIPVVEIMDVDGTPIDSVVGISHRRAGQQMAQAIIKAGYRRIGFMGTKMPLDHRARKRFEGFTEALAKAGIEMADHEFYSGGSALLKGREMTAEMLRRTPDLDFLYYSNDMIGAGGLLYLLEQGIDIPEQMGLAGFNGVDLLKGLPRELATMDACRLQIGRKAAEIIAARAVSPGEVEPVRITLEPTLSLGDTLRRR
Proteobacteria/Alpha	Rhodobacterales	5568	54581	GapR	SPO3684	Q5LM80_RUEPO	U		Silicibacter pomeroyi DSS-3	246200	Central carbohydrate metabolism	null	MTADTKRPLTLRDVSEASGVSEMTVSRVLRNRGDVSDATRARVLAAAKELGYVPNKIAGALASNRVNLVAVIIPSLSNMVFPEVLTGINQVLEDTELQPVVGVTDYLPEKEEKVLYEMLSWRPSGVIIAGLEHSEAARAMLDAAGIPVVEIMDSDGKPVDAMVGISHRRAGREMAQAILKAGYRRIGFMGTKMPLDYRARKRFEGFTEVLGKNGVEIEDREFYSGGSALAKGREMTQAMLERSPDLDFLYYSNDMIAAGGLLYLLEQGIDIPGQIGLAGFNNVELLQGLPRKLATMDACRLEIGRKAAEIIAKRLEDPEAEIETRITLEPKISYGDTLKRR
Proteobacteria/Alpha	Rhodobacterales	5568	54580	GapR	TM1040_3128	Q1GML4_RUEST	U		Silicibacter TM1040	292414	Central carbohydrate metabolism	null	MTNDSKRPLTLRDVSDATGVSEMTVSRVLRNRGDVSEKTRQKVLEAAKELGYVPNKIAGALASKRVNLVAVIIPSLSNMVFPEVLTGINRVLEDTELQPVVGVTDYQPEKEEKVLYEMLSWRPSGVIIAGLEHTEPARAMLAAAGIPVVEIMDTDGNPVDSMVGISHRRAGREMAKAILKAGYSHIGFMGTKMPLDHRARKRFEGFTEALAKEGVEIEDREFYSGGSALAKGREMTQAMLERSPELDFLYYSNDMIGAGGLLHLIDQGIDVPGQIGLAGFNGVELLAGLPRQLATMDACRQEIGMKAAQIIAAQLEDSNAEIEKHVTLTPTITYGDTLKRR
Proteobacteria/Alpha	Rhodobacterales	5568	54582	GapR	EE36_07953	A3SA09_9RHOB	U		Sulfitobacter sp. EE-36	52598	Central carbohydrate metabolism	null	MTVSRVLRKRGDVSEATRRRVLAAAKELGYVPNQIAGSLASQRVNLVAVIIPSLSNMVFPEVLNGVNQVLEDTPLQPVVGVTDYMPEKEERVLYEMLSWRPSGVIIAGLEHSDATRAMLKNAGIPVVEIMDVDGRPIDAMVGISHRRAGQEMAKAILKEGYEHIGFMGTKMPLDHRARKRFEGFTEGLAKAGIEIEDRAFYSGGSALAKGREMTQDMLERSPELDFLYYSNDMIGAGGLLYLIDQGIDIPGQIGLAGFNNVELLQGLPRQLATMDACRLEIGQAAARIILNDTLDEPDPDLQTQITLTPTLSLGDTLRRNRKV
Thermotogae	Thermotogales	747	7218	GloR	Pmob_1599	A9BGQ3_PETMO	U		Petrotoga mobilis SJ95	403833	Fucose-glucose oligosaccharide utilization	null	MQKTTIKDIAKALNISPSTVSRALNGKNGVSEKLSVTIREKAEELGYVGNFAARSLKTSQSKTIGVTVSDIRNPFFLDFLKGVDNILFQRGYKFLLTDSGENVEKEKIYLMWLIEHGVDGILASPVTERDGKNNLELYKKIKNISIPIVFYDRVFPEESQFDSVTVDNKDSIIQALKYLYNKGHRKIGIFLSKSGIYTIEQRLEGFIEGCELLGIKINEEWIAKDLFPEEKTYDKLKKLKKNHNLPTAIIATNNKITKQLISASKKLNILIPNTLSIMGYDDLTENEIISPPITCIKQPVFEIGRIASTILLGKIENDETKTTKIVLKTEIVERNSIINLNKNTLN
Thermotogae	Thermotogales	747	7214	GloR	Tlet_0017	A8F354_THELT	U		Thermotoga lettingae TMO	416591	Fucose-glucose oligosaccharide utilization	null	MKITIKDIAKKLGVNASTVSRALNGKPGVSAQLREKIIQLAEKMGYLPDLTAMGLKKGQTKIIGVLIPDISNPFFAYTVRGMEKVLRPIGYHLLLCSTNEDPDQEVENLRTLASQKVEGILAAPVDSGGNRTIYKKIAESGIPLVFFDRIVPNVDVSYVITDNESGVRELVTYLYKSGHRTIGIMTLRARSFTGKERLNGVLKACKELGITVQNEWIIDGESSEEGGYRAAKRFFSLCRKPTALIVSNNLMMLGVMKVIKETGLKVPQDISLVSFDDSHWNEIFEPPITCVAQEPEQMGLIAATLLINNIFHDKKTSRTVLKAHFIERQSVAKI
Thermotogae	Thermotogales	747	7209	GloR	TM0299	Q9WYD5_THEMA	U	*	Thermotoga maritima MSB8	243274	Fucose-glucose oligosaccharide utilization	null	MKKATLKDIAEYFGVSISTVSRALSGKPGVSSELREKILEKAREIGYTPNLMALGLKKGNTRTVGVLIPELSANFFADIVSSIEKSLFHLGYRLILCSTDDDPVKEREHLQLLLDQKVEGILSAPVNVKENKDIYNSIINHFKIPVVFFDRLVEGVDSDFVISDNREGMEILVNYLVKHGHKKIGLIHPLRGSFTGEERLKGFLLFKDSIEIREEWIRDGRSSEQGGYESFLRIMTSQERPTAIVIGNNLMTLGVLKAAKELNIKIPEDISLVSFDDAYWNEIFDPPITCVRQDPQQIGLIAATILLDRMKNRKKPSPRMQVVLKVKFVERSSVRTIKTLKDFS
Thermotogae	Thermotogales	747	7213	GloR	Tnap_0935	D2C7T9_THENR	U		Thermotoga naphthophila RKU-10	590168	Fucose-glucose oligosaccharide utilization	null	MERRVTLKKVSLKAIAQQLNVSVSTVSRALNGKPGVSKRLREQIIKVANDLGYTPDPLAVGLKRGTTKLIGILVPELKGDFFATIVESVERALYHLGYRLLLCPTEDDPKKEEDHLKILVNQRVDGILSAPANFRSNKSLYEAIINEHKIPVVFFDRLVEGVETDYVISDNEEGMRILLEYLISKGHRKIGFIHPLRGIYTSEIRLKTFLEYKDKIVFQEEWIKDGKSSEEDAKEAFTTIMRSKEKPTAIIVGSYHMTLGCLRAAKEMMLKIPEDISIVSFDDAPWNEIFEPPITCVSQDPREIGLIASTILLSRLKNKKMGESRIQTVLKVKFLERLSVAFIK
Thermotogae	Thermotogales	747	7210	GloR	TRQ2_0632	B1L9I7_THESQ	U		Thermotoga sp. RQ2	126740	Fucose-glucose oligosaccharide utilization	null	MKKATLKDIAEYFGVSISTVSRALSGKPGVSSELREKILEKAREIGYTPNLMALGLKKGNTRTVGVLIPELSANFFADIVSSIEKSLFHLGYRLILCSTDDDPVKEREHLQLLLDQKVEGILSAPVNVKENKDIYNSIINHFKIPVVFFDRLVEGVDSDFVISDNREGMEILVNYLVKHGHKKIGLIHPLRGSFTGEERLKGFLLFKDSIEIREEWIRDGRSSEQGGYESFLRIMTSQERPTAIVIGNNLMTLGVLKAAKELNIKIPEDISLVSFDDAYWNEIFDPPITCVRQDPQQIGLIAATILLDRMKNRKKPSPRMQVVLKVKFVERSSVRTIKTLKDFS
Proteobacteria/Alpha	Caulobacterales	5229	51576	GluR	CC2053	Q9A6N4_CAUCR	U	*	Caulobacter crescentus CB15	190650	Carbohydrate metabolism	Glucose	MSAKVTIHDVARESGVSIKTVSRVLNREPNVKADTRDRVQAAVAALHYRPNISARSLAGAKAYLIGVFFDNPSPGYVTDVQLGAIARCRQEGFHLIVEPIDSTADVEDQVAPMLTTLRMDGVILTPPLSDHPVVLAALEREGVAYVRIAPGDDFDRAPWVSMDDRLAAYEMTKHLVDLGHKDIAFIVGHPDHGASHRRHQGFLDAMRDSGLRVRDDRVAQGWFSFRSGFEAAEKLLGGADRPTAIFASNDDMALGVMAVANRLRLDVPTQLSVAGFDDTPGAKITWPQLTTVRQPIHAMAGAAADMLMQGVEREEGAPPPSRLLDFELVVRESTGPASH
Proteobacteria/Alpha	Caulobacterales	5229	51577	GluR	Cseg_1378	D5VIQ5_CAUST	U		Caulobacter segnis ATCC 21756	509190	Carbohydrate metabolism	Glucose	MSAKITIHDVARESGVSIKTVSRVLNREPNVKADTRDRVQAAVAALNYRPNISARSLAGAKAYLIGVFFDNPSPGYVTDVQLGAIARCRQEGYHLIVEPIDSTGDVEEQVAPMLATLRMDGVILTPPLSDHPVVLAALEREGVPYVRIAPGDDIERAPWVSMDDREAAYDMTNHLIGLGHRDIGFIIGHPDHGASARRHQGFVDAMRDANLPVRQDRVEQGWFSFRSGFEAAERLLGGSDRPTAIFASNDDMALGVMAVANRMRLDVPAQLSIAGFDDTPGARITWPQLTTVRQPIAAMAGAAADMLMSGVEHEEGEPPPSRLLDFELVVRESTGQAPG
Proteobacteria/Alpha	Caulobacterales	5229	51578	GluR	Caul_1442	B0T0C6_CAUSK	U		Caulobacter sp. K31	366602	Carbohydrate metabolism	Glucose	MSSKVTIHEVARMSGVSIKTVSRVLNREPNVKNDTRTRVQEAVAALNYRPNISARSLAGSKAYLIGVFFDNPSPAYVTDVQLGAIARCREEGYHLIVEPLDSTGDVAAQVEPMLHTLRMDGVILTPPVCDNVAVLDVLEAEGVPYVRLSPDQDLDRSAHVRMDDVRAAYEMTAHLISLGHTDIGFIKGHPEHGASHLRYEGYVAAMKEHGHAVREEHVEQGWFSFRSGFEAAERLLERADRPTAIFASNDDMALGVMAVANRLRLEVPQTLSVAGFDDTPGAKVVWPQLTTVRQPIQAMAAAAADLLLNGAIRAEGDAPPSRLLDFELVLRESTGPVPPTA
Proteobacteria/Gamma	Alteromonadales	5046	49823	GntR	PSHAb0478	Q3ICD9_PSEHT	U	*	Pseudoalteromonas haloplanktis TAC125	326442	Gluconate utilization	Gluconate	MTVSRYLRNPEKVSATTQIKIKAAIDSLGYIANKAPDLLSNAKSYSIGVLVPSLTNQVFSQVIRGIEDITEPAGYQTMLAHYGYSPEIEEKRVEYLLSYHVDGLILSETTHTDRTRKMIAMAGIPVVEIMDIHHTPIHQAVGFDNAKAAFEMTNALLNKGYRNIVYLGARLDMRTQLKFQGYSDAMLLRGLTPKSVMTNEASSFSLGAKLLQKTRTEHPDTDCIFCTNDDLAIGAIFECQRNNISVPQHMGVVGFHGHDIGQSMVPQLASVITPRYQIGNLAGAKLLSRISSTADIEIPDEQICDTGYVIHLGESV
Proteobacteria/Beta	Burkholderia	5052	49868	GntR	Bphy_5547	B2JUA1_BURP8	U	*	Burkholderia phymatum STM815	391038	Gluconate utilization	Gluconate	MATSTPRKTRSTGRPTLDAVAELAGVSSITASRVLRGVGSVGPEYVQRVKAAAAELHYVTNPAARALASSRSGSVAVVIPSLSNTVFVDVLESIHNVLRPRGYEILIGNSHYSRNAEEDLIRHYLASPPSGLIVTGFDRTESARRLIEASGVPCVHIMELEKAEGVHCVGFSQARAGEAVADHLIARGCRRNAFVAAQLDSRMMQRGEGFREALRRKGLYDPELEVLTPAPSSIGLGCDLFRQLLQRRPDVDGIFFGNDDLAQGALFEARRQGIDIPDQVAIVGFNDLAGAADCVPRLTTVRTPRAEVGRVASNLLLSMIDNKPVASPVVDLGYELVVRESA
Proteobacteria/Beta	Comamonadaceae	5053	49869	GntR	Aave_2798	A1TQX8_ACIAC	U		Acidovorax avenae subsp. citrulli AAC00-1	397945	Gluconate utilization	Gluconate	MNDSALPRPRRARRASGRVTLDDVARLAGVSPITVSRALRRERSVDPALAERVQAAAQQLGYVPDPAARALASQRSTQVLVLVPMLSNTLFVDLLEAVHRTLFPQGFLPLIGVTHYDAAEEEVLLRTYLPHRPAGLLVTGFDRSEAARQLIARSGVPCVHLMETSEAPGVYCVGFSQLEAGAAITRHLLERGRRRIAFCAAQLDPRTLQRAEGYRRTLREAGVYDPQLEMLSPEGSSIALGARLFEETLRRAPDVDAIFFCNDDIAQGGLLAASRCGVPVPERVAVAGFNDLAGSDQMVPPLTTVRTPRGEVGRAGAAMLLGLMHGTPPARHCVSLDFELVVRGST
Proteobacteria/Beta	Comamonadaceae	5053	49870	GntR	Ajs_2054	A1W7K5_ACISJ	U		Acidovorax sp. JS42	232721	Gluconate utilization	Gluconate	MTANRRPRRSSGRITLNDVAGAAGVSPITVSRALRGERTVDPALAERVREAADRLGYVPDPAARALASQRSTQVLVLVPLLSNALFVDLLEAVHRTLFPEGFQPLIGVTHYDSAEEELLLRTYLPHRPAGLLVTGFDRSEAARQLIVHSGVPCVHLMETSAAPGVACVGFSQQDAGATITRHLLERGRKRIAFCAAQLDPRVLQRAEGYRRTLREAGLYDPRLELLSPERSSIALGARLFEDLVQRMPDVDAIFFCNDDIAQGGLLAANRMRIDVPGRIAVAGFNDLAGSAQMVPPLTTIRTPRSEVGRAGADMLLGLMRGTLAQPQCVQLDYELIVREST
Proteobacteria/Beta	Comamonadaceae	5053	49871	GntR	CtesDRAFT_0562	B7WZM6_COMTE	U		Comamonas testosteroni KF-1	399795	Gluconate utilization	Gluconate	MPTETRTKSETPADSASSRRSRASGRVTLSDVAQAAGVSPMTVSRALRGERRVAPALVDKVREVAAFLGYVPDLAARALASQKSTQVLVLVPMLSNTLFVEVLEAVHKVLFAQGYHMLIGVTHYDPAEEEQLLRAYLPMRPAGLLLTGFDHSEESRKLLAANPVPRVHLMELRAPGSGPDCYSVGFSQIAAGAEMTRHLLDKGYRRIAFCGAQLDARVMQRLEGYRQVLKQAGLYDQSLEILNPERSSLALGARQFETLLKAKTTVDAIFFCNDDIAQGALLEANRMGVKVPQQVAIAGFNDLPGSDQMVPPLTTIHTPRDEVGSKAAGMLLQLLAGDSVRQASVDLGFRLVPRAST
Proteobacteria/Beta	Comamonadaceae	5053	49872	GntR	Daci_3760	A9C2P3_DELAS	U		Delftia acidovorans SPH-1	398578	Gluconate utilization	Gluconate	MARQIPPASPESPSADVSGPALPATGRARSSRASGRITLSDVAQAAGVSPMTVSRALRGERRVDPALVEKIRTAAAQMGYVPDPAARALASQKSAQVLVLVPMLSNTLFVDLIEAVHKVLFSAGYHALIGVTHYDRAEEEQLLRTYLPMRPAGLLLTGFDRSPAARELVQASKVPCVHLMELGGEPGAPSVGFSQAEAGAAITRHLMERGHRRIAFCAGQLDARVMQRAAGYRHALQAAGLHDPALELLWPRPTSMALGAELLDAALRLDPAVDALFFCNDDIAQGALLEALRRGIRVPEQIAIAGFNDLPGSDQMVPPLTTIRTPRGHIGTEGARMLLQLMRGEAVEPPSVDLGYELVVRQSS
Proteobacteria/Beta	Comamonadaceae	5053	49879	GntR	Lcho_0328	B1XW76_LEPCP	U		Leptothrix cholodnii SP-6	395495	Gluconate utilization	Gluconate	MNPAPKRARATGRVTLSDVAQAAGVSPITVSRALRGERAVDPELVARALAAARKLGYVPDPAARALASQRSAHVAVLIPMLSNALFVDLLEAVQRTLRRAGYLALIGITHYDASEEEQLLREQLVHRPAGLLVTGLDRNEATRTLIEQGGMPCVHLMETSREPGVHCVGLSQADAAAAMTRHLLDRGRRRIAFAAAQLDPRTLQRLEGWRRELSAAGLHDARLEWLNPAPSSMALGGRMFEQIMAHTPAVDAIFFCNDDLAQGALLAAARARIAVPERVAIAGFNDLMGSDLVIPPLTTVRTPRAEIGEAAATMLLKLMRGEPVPQPSIDLGYTVVVREST
Proteobacteria/Beta	Comamonadaceae	5053	49873	GntR	Pnap_0047	A1VI95_POLNA	U		Polaromonas naphthalenivorans CJ2	365044	Gluconate utilization	Gluconate	MRASAPYHSVVSLGFMTPARLRPRATGRVTLTDVAQAAGVSPITVSRALRGERAVDPALVERVQAAARSLGYVPDPAARALASQRSSHVAVLIPMLSNALFVDLLEAVQRSLRPAGYQTLMGVTHYNADEEEQLLREQLLQRPAGLVVTGLERSDAARALIAQSGVPCVHVMEMSSVPGVYSVGFSQADAGAELTRHLLARGRRRIAFVAAQLDARTLQRLEGWRRELLAAGLHDPALEWLDPAPSSIALGARLFERIIGEQPDVDAVFFCNDDLAQGALLAALRLGVAVPERVAVAGFNDLTGSDQMLPPLTTVRTPRSEIGHAAARMLLALMNGETVASPCVDLGYELVVRAST
Proteobacteria/Beta	Comamonadaceae	5053	49875	GntR	Rfer_0957	Q21ZV1_RHOFD	U	*	Rhodoferax ferrireducens DSM 15236	338969	Gluconate utilization	Gluconate	MVSKKRDNRASGRVTLDDVALAAGVSRMTVSRALRGDRKVAPELVARAIQAANRLGYVPDPAARALASSKSSHVAILIPLLSNQLFVDLLEGVQRTLLPTGYQTLMGVTHYDASEEEQLLKGYLMHRPAGLLVTGSEHSESTKQLIAKSGIPCVHLMETLAQDGIYSVGFSQRDAARVVTQHLIDTGRRRIAFAAAQLDPRTLQRAHGYRDCLKEAGLYDATLEWQNPAPSSLKIGSTMFEQILSIRPRVDAIFFCNDDLAQGGLLAALRMGIKVPRQVSIAGFNDLPGSAEFVPSLTTIKTPRWEIGVRAAKMLLQLMRGEPVAEPNVDLGFELVLRQSTAVA
Proteobacteria/Beta	Comamonadaceae	5053	49876	GntR	Vapar_6141	C5D1D4_VARPS	U		Variovorax paradoxus S110	543728	Gluconate utilization	Gluconate	MADAPDRPRPRSSSHVTLDDVARVSGVSPITVSRALRGARNVAPELKARVQAAVDQLGYVPNVAARALASARSSHVAVLIPSLTNQLFVELLEAVQDALAPHGYQSLIGVTHYDPAQEEALLRSHLSQRPAGLLLTGFDRSAAAAQMLERSHAPCVYMMETSAAPGVHSVGFSQRDAGRAITRHLLQRGRRRIAYAAGQLDPRVLLRLEGYREALREAGCHDPALELLVPGPTSMALGGRQFEDLLARHPDVDAIFYCNDDLAQGGLLAALRSGVPVPQRVAIAGFNDLGGSDQMLPPLTTVRTPRKEMGERAAGMLLALMRAETVAERTVDLGFELVVRESS
Proteobacteria/Gamma	Enterobacteriales	1169	10739	GntR	CKO_04857	A8AQY9_CITK8	U		Citrobacter koseri ATCC BAA-895	290338	Gluconate utilization	Gluconate	MHVRGKLGKSIPFMPFRTMKKKRPVLQDVADRVGVTKMTVSRFLRNPEQVSVALRGKIAAALDELGYIPNRAPDILSNATSRAVGVLLPSLTNQVFAEVLRGIETVTDAHGYQTMLAHYGYKPEMEQERLESMLSWNIDGLILTERTHTPRTLKMIEVAGIPVVELMDSKSPCLDIAVGFDNFEAARQMTAAIIARGHRHIAYLGARLDERTIIKQKGYEQAMLDAGLVPYSVMVEQSSSYSSGIELIRQARREYPQLDGIFCTNDDLAVGAAFECQRLGLKIPDDMAIAGFHGHDIGQVMEPRLASVLTPRERMGSIGAERLLARIRGEAVTPKMLDLGFTLSPGGSI
Proteobacteria/Gamma	Enterobacteriales	1169	10740	GntR	ETAE_0136	D0Z9A9_EDWTE	U		Edwardsiella tarda EIB202	498217	Gluconate utilization	Gluconate	MKMKKKRPVLQDIADRVGVTKMTVSRYLRNPELVSLPLRGKIAAALDELGYIPNRAPDILSNATSRAIGVLLPSLTNQVFAEVLRGIESVTDQHHYQTMLAHYGYRKEKEEERLTSLLSYNIDGLILAERDHTPRTLKMIEVAGIPVVELMDSVSPCLDMAVGFDNVEAARAMTQAIIARGHRRTVYFGARLDERTVMKQRGYEAAMRAADLTPRSVMIPRSSSYSVGGELLREALKRYPDMDSIFCTNDDLAVGAAFECQRLGLRIPQDMAIAGFHGHDIGQVMEPQLASVLTPRQRMGQLAAERLLARLRGERSVEAAAIDVGFTLLHGGSI
Proteobacteria/Gamma	Enterobacteriales	1169	10741	GntR	Ent638_3846	A4WFM1_ENT38	U		Enterobacter sp. 638	399742	Gluconate utilization	Gluconate	MKKKRPVLQDVADRVGVTKMTVSRFLRNPEQVSLALRGKIAAALDELGYIPNRAPDILSNSTSRAVGVLLPSLTNQVFAEVLRGIESVTDAYGYQTMLAHYGYKPELEEERLESMLSWNIDGLILTERTHTPRTLKMIEVAGIPVVELMDSQSPCLDIAVGFDNFEAARQMTAAILARGHRHVAYLGARLDERTIIKQKGYEQAMIDANLTPYSVMVEQSSSYSSGIELMRQARREYPQLDGIFCTNDDLAVGAAFECQRLGLKIPDDIAIAGFHGHDIGQVMEPRLASVLTPRERMGRIGAERLLARIRGEVVTPKMLDLGFTLSPGGSI
Proteobacteria/Gamma	Enterobacteriales	1169	10742	GntR	EAM_3276	D4IEG3_ERWAE	U		Erwinia amylovora ATCC 49946	716540	Gluconate utilization	Gluconate	MKKKRLGLQDVADRIGITKMTVSRYLRHPDRVSAALQSRIAIALDELGYIPNRAPEMLSNATSRAIGVLLPSLTNQVFADVLRGIEAVTDATGYQTLLGHFGYSAEKEELQLRSLLTWNIDGLILTERTHTAASLRMIETSGIPVVETMDCTSPCLDMAVGIDNVEAARQMTRAILQKGHRNTVYLGARLDERTLQKEQGYRLAMLEAGLEPKSVMMEAASSYSAGAMLLCEAQKRYPQTDSLFCTNDDLAVGAMFECQRQGLRVPQQMAIAGFHGHDIAQVVTPRLATVQTPRERIGNQAARLLLARIRGERITHQSVDVGFTISPGESI
Proteobacteria/Gamma	Enterobacteriales	1169	10743	GntR	ECA4160	Q6CZJ1_PECAS	U		Erwinia carotovora subsp. atroseptica SCRI1043	218491	Gluconate utilization	Gluconate	MKKKRPVPQDVADRVGITKMTVSRYLRNPAQVSAALQEKIAIALDELGYIPNLAPNMLASSTSRAIGVLLQSLTNQVFAEVLRGIERTAEAHGYQTMLAHYGYHPDREEQRLTSLLSYHIDGLILAERTHTPRTRQMLDVAGIPVVELMDSVSPCLDMAVGFDNVEAARQL
Proteobacteria/Gamma	Enterobacteriales	1169	10743	GntR	ECA1838	Q6D650_PECAS	U		Erwinia carotovora subsp. atroseptica SCRI1043	218491	Gluconate utilization	Gluconate	MKKKRPGLQDVANCVGVTKMTISRYLRDPQKVSATLRDKIAAALDELGYIPNRAPEILSNATSRAIGVLLPSLTNQVFAEVLRGIERVTDAHGYQTMLAHYGYHAEREEMRLTSLLSYNIDGLILSERSHTERTRKMIEVAGIPVIEIMDSESPCIDLAVGFNNFEAAYQMTQVLLARGHRFPVYLGSRLDERTLIKMQGYEQAMREAGLMPRDVSTDRPSSYSLGGELMKEALERYPETDSLFCTNDDIAIGAAFECQRQGLHIPDQMAIAGFHGHDIGQSMEPKLASVLTPREIMGQVAAERLLARLRGEVVTPQRLDLGFTILHGGSI
Proteobacteria/Gamma	Enterobacteriales	1169	10744	GntR	b3438	U6NHJ3_ECOLI	U	*	Escherichia coli str. K-12 substr. MG1655	511145	Gluconate utilization	Gluconate	MKKKRPVLQDVADRVGVTKMTVSRFLRNPEQVSVALRGKIAAALDELGYIPNRAPDILSNATSRAIGVLLPSLTNQVFAEVLRGIESVTDAHGYQTMLAHYGYKPEMEQERLESMLSWNIDGLILTERTHTPRTLKMIEVAGIPVVELMDSKSPCLDIAVGFDNFEAARQMTTAIIARGHRHIAYLGARLDERTIIKQKGYEQAMLDAGLVPYSVMVEQSSSYSSGIELIRQARREYPQLDGVFCTNDDLAVGAAFECQRLGLKVPDDMAIAGFHGHDIGQVMEPRLASVLTPRERMGSIGAERLLARIRGESVTPKMLDLGFTLSPGGSI
Proteobacteria/Gamma	Enterobacteriales	1169	10745	GntR	KPN_03802	A6TF55_KLEP7	U		Klebsiella pneumoniae subsp. pneumoniae MGH 78578	272620	Gluconate utilization	Gluconate	MKKKRPVLQDVADLVGVTKMTVSRYLRNPEQVSEALRGKIAVALDELGYIPNRAPDILSNATSRAIGVLLPSLTNQVFSEVLRGIESVTDAFGYQTMLAHYGYKPEMEEKRLESMLSWNIDGLILTERTHTPRTLKMIEVAGIPVVELMDSRSPCLDIAVGFDNFEAARQMTAAIIARGHRHVAYLGARLDERTIIKQKGYEQAMLDAGMTPYSVMVEQSSSYSSGIELMRQARREYPQLDGIFCTNDDLAVGAAFECQRLGLKIPDDMAIAGFHGHDIGQVMEPRLASVLTPRERMGRIGAERLLARIRGEAITPKMLDLGFTLSPGGSI
Proteobacteria/Gamma	Enterobacteriales	1169	10746	GntR	plu0496	Q7N953_PHOLL	U		Photorhabdus luminescens subsp. laumondii TTO1	243265	Gluconate utilization	Gluconate	MKKKRPILQDVADRVGITKMTVSRFLRNPDQVSEQLRKKIADALDELGYIPNKVPDILSNSTSHAIGILLPSLTNQVFAEVIRGIEYVTDSYGYQTMLAHYGYRSEKEEERLISLLSYNIDGLILSERTHTPRTLKMLGTAGIPVVELMDCVSPCFDMAVGIDNFEAARQMVIAMIERGCQRVIYLGARQDERTIIRLEGYEAAMKSAGLKPGKIMTPDSSSYTLGGQLLNEARTKYPDVDGLFCTNDDLAIGAIFECQRQGIAVPHDIAIAGFHGHDVGQVMTPKLASVLTSRDLLGRRAAELLMARLKGEHLPQKIIDIGFQLSLGESI
Proteobacteria/Gamma	Enterobacteriales	1169	10747	GntR	PMI2674	B4EY42_PROMH	U		Proteus mirabilis HI4320	529507	Gluconate utilization	Gluconate	MKKKRPSLQDVADRVGVTKMTVSRFLRNPEQVSEALRVKIARELDSLNYIPNRAPDILSNATSHAIGVLLPSLTNQVFAQVIRGIESVTDKYGYQTMLAHYGYQAEKEEERLISLLSYNIDGLILAERTHTPKTVKMLETAGIPVVEIMDSVSPCFDSAVGLDNIEASRKMVSEMIHRGCKRIIYLGARQDERTLMRLQGYEQAMQEAGLPIGHVMTPKSSSYSLGTELLHEARKQYPDLDGLYCTNDDIAIGAIFECQRMGIAVPEQIAISGFHGHDVGQVMTPRLASIFTPRDEMGQQAADLLLKRMKGKIARGQVIDVGFRIITGESI
Proteobacteria/Gamma	Enterobacteriales	1169	10748	GntR	STM3543	Q7CPK3_SALTY	U		Salmonella typhimurium LT2	99287	Gluconate utilization	Gluconate	MKKKRPVLQDVADRVGVTKMTVSRFLRNPEQVSVALRGKIAAALDELGYIPNRAPDILSNATSRAIGVLLPSLTNQVFAEVLRGIEAVTDAHGYQTMLAHYGYKPEMEQERLESMLSWNIDGLILTERTHTPRTLKMIEVAGIPVVELMDSQSPCLDIAVGFDNFEAARQMTAAIIARGHRHIAYLGARLDERTIIKQKGYEQAMRDAGLVPYSVMMEQSSSYSSGIELMRQARREYPQLDGIFCTNDDLAVGAAFECQRLGLKIPDDMAIAGFHGHDIGQVMEPRLASVLTPRERMGSIGAERLLARIRGETVTPKMLDLGFTLSPGGSI
Proteobacteria/Gamma	Enterobacteriales	1169	10749	GntR	Spro_4652	A8GKV5_SERP5	U		Serratia proteamaculans 568	399741	Gluconate utilization	Gluconate	MSAHSRLASSLIMKKKRPVLQDVADKVGVTKMTVSRYLRNPDQVSAVLQQKIAVALDELGYIPNRAPDILSNSTSRAIGVLLPSLTNQVFAEVLRGIESVTDAHNYQTMLAHYGYLPEREEQRLTSLLSYNIDGLILSERHHTPRTMKMIEVAGIPVVELMDCVSPCIDLAVGFNNFEAARQMTQQIIAHGHRHVVYFGARQDERTIIKQQGYEQAMRESGLQPYSVMTARSSSYSAGGELLRQAQRDYPQIDSIFCTNDDLAIGATFECQRQGLSIPNDMAIAGFHGHDIGQVMVPKLASVLTPRERMGQIGAERLLARLRGETVSPRMVDVGFTVIPGGSI
Proteobacteria/Gamma	Enterobacteriales	1169	10750	GntR	y3873	Q7CFZ4_YERPE	U		Yersinia pestis KIM	187410	Gluconate utilization	Gluconate	MKKKRPVLQDVADMVGVTKMTVSRYLRNPEQVSAVLQEKIALALDELGYIPNRAPDILSNATSHAIGVLLPSLTNQVFAEVLRGIESVTDAHGYQTMLAHYGYQKEREEQRLTSLLSYNIDGLILSERHHTARTLKMIEVAGIPVIELMDCISPCLDLAVGFNNFEAARQMTQQIIAKGHRYVVYFGARQDERTVIKQQGYEQAMRESGLVPMSVMTSRSSSYSAGAELLREAQVSYPQIDSIFCTNDDLAIGAVFECQRQGLSIPHDMAIAGFHGHDIGQSMVPKLASVLTPRERMGQIGAERLLARLRGEGVTPQMVDVGFTILPGGSI
Proteobacteria/Gamma	Oceanospirillales/Alteromonadales	5048	49842	GntR	Csal_0927	Q1QZ24_CHRSD	U		Chromohalobacter salexigens DSM 3043	290398	Gluconate utilization	Gluconate	MPRRSSGRVTLQDIAERVGVSKVTVSRALREPQRVSETLRLRIEEAIEVLDYIPNRQAGALSSGRSLSVALLVPSISNSVFSDVQRGVDEGLREAGYQVLIGHTGYSILEEERLIDTFLAYGVDGFVLSSTRHTDHAQRLLTRARLPVVETMELTETPLDINVGLDQRAAGRAIGEALIAAGYRRIGFCGARLDYRVQLRLAGWEDALKAAGLSTQRCQTTPRPSSYRLGGELLSAMLERWPDMDAVFCCNDDLAAGALFECQRRRLDVPGQLALAGFNGLDITDATWPTLTTVVTPRRAIGERAASTLIARLRGQPREPCRHDMGFEIVLRQST
Proteobacteria/Gamma	Oceanospirillales/Alteromonadales	5048	49833	GntR	HCH_03544	Q2SGD8_HAHCH	U	*	Hahella chejuensis KCTC 2396	349521	Gluconate utilization	Gluconate	MKKRRPTLQDIADQVGATKMTVSRCLRQPELVSEPLRHKIQTAVRELGYIPNRAPDILSKSRSHAIGVLIPSLTNQVFSDVIRGIEQVTESRGYHLMFTHYGYSPELEEQNLANLLAYNVDGVIMSESRHTERALQMIRTAGTPTVEIMDTRSPALDQAIGFDNVQAAYDMTRTLIQRGYRRTAYLSVRLDTRTLQRQEGYQQAMRDAGLAPRTMQYAARSSFSVGAHLMTRILDEMPETDAIFCTNDDVAIGAYFECLRRGIKVPQEMAIAGFHGHDVGQVMTPQLASVLTPRHEMGALAAEALLARLEGQPDFESVIDLGYVISPGGTI
Proteobacteria/Gamma	Oceanospirillales/Alteromonadales	5048	49838	GntR	Mmwyl1_0694	A6VT49_MARMS	U		Marinomonas sp. MWYL1	400668	Gluconate utilization	Gluconate	MIMLLVTKHGYVTGMKSPNMKNKRPTLQDVADLVGVTKMTVSRFLRNPDQVSAPLQTKIAEALEDLGYIPNRAPDILSKSKSHAIGVLLPSLTNQVFAEVIRGIESVVEPAGYQTMLAHYGYSKEAEEARIATLLSYSVDGLIISESYHTERVRKMLAVAGIPVIEIMDSVSPPIEQAIGIDNEAAAYAMTEFMIKKGRRKIVYFAARMDQRTLFKIKGYETAMLDNGLTPLCLKTNSASSFTLGATFLKDALQQQPDTDGIFCTNDDLAIGALYACQKAGINVPQDIGIAGFHGHDISRAMVPLLTTVITPREEMGRLAAEHLLSRLQGNPVSQRIIDLPFKIEAGESI
Proteobacteria/Gamma	Pasteurellales	5045	49815	GntR	APP7_1727	B3H2R2_ACTP7	U		Actinobacillus pleuropneumoniae serovar 7 str. AP76	537457	Gluconate utilization	Gluconate	MSKHKRPTLQDIAEHLGITKMTISRYLRNPASVAEETGKRIAVAIEQFGYIPNRAPDILSNAKSKAIGVLLPSLTNQVFADVLKGIESVTDAAGYQTMLAHYGYSEQKEEQRIESLLSYHVDGLILSENHHSERTLKMLSVAKIPVIEIMDTSEKGLQQAVGFDNIFAAQAMVETMIKRGCRQVVYFSARMDKRTRLKMQGYELAMQKHKLTPYTIATEESSSFTLGARQLHIALEKYPNIDGIFCTNDDLAIGALFECQRLGIKVPQQIAIAGFHGHDVGQSITPQLASVITPRFEIGKVAAQQLLNRINHQTPQDEMINLGYKIHTGETI
Proteobacteria/Gamma	Pasteurellales	5045	49813	GntR	Asuc_1703	A6VQ08_ACTSZ	U		Actinobacillus succinogenes 130Z	339671	Gluconate utilization	Gluconate	MTKAKRPTLQDIANHLGITKMTVSRYLRNPDTVAPETQIRIAQAIENFSYIPNKAPNMLSNAKSGAIGVLVPSLTNAVFANVIRGIEQVTDRAGYQTMLAHFGYSIEKEEKRLESLLSYNVDGVILSENIHTERTLKMLEVADIPVIQIMDTSEMSKHQVVGFDNFSAAQSMVETMILRGHENIVYFAVRMDKRTKLKQAGYEKAMEKHGLTPHTISTQAHSSFSLGGELLQQAVKQYPSMDGIFCTNDDLAIGALFECQRLGIGVPEQIGIAGFHGHDVGQSISPQLATVITPRFEIGQIAAQELLNRINGIPYRSAVINLGYDVHLGETL
Proteobacteria/Gamma	Pasteurellales	5045	49810	GntR	NT05HA_1090	C6ANP5_AGGAN	U		Aggregatibacter aphrophilus NJ8700	634176	Gluconate utilization	Gluconate	MTKNKRPTLQDIADYLGITKMTISRYLRNPDSVASGTQARIAEAIERFGYIPNRAPDILSNAKSRAIGVLVPSLTNQVFANVIRGIEQITDKAGYQTMLAHYGYSEKKEERRIESLLSYNVDGIILSESQHSEKTKKMLKVANIPVIEIMDTTEVGIQQVVGFDNIAAAQAMVETMINRGHRNVVYFAARQDKRTRLRQQGYENAMAKHQLTSHVIATKEHSSFTLGGELLHQALETFPQIDGIFCTNDDIAIGAIFECQRLGIQVPKQIAVAGFHGHDVGQSITPQLATVITPRLDIGRIAAQELLARIDNIPAQSAIINLGYQIHLGESI
Proteobacteria/Gamma	Pasteurellales	5045	49817	GntR	HAPS_1789	B8F7J7_HAEPS	U		Haemophilus parasuis SH0165	557723	Gluconate utilization	Gluconate	MTISRYLRNPEAVAHQTGLRIAEAITEFGYIPNRAPDILSNAKSRAIGVLVPSLTNQVFADVIKGIELVTDKAGYQTMLAHYGYSQEKEEQRIESLLSYNVDGIILSENHHSKRTLKMLEVANIPVIEIMDSSEIGIQQAVGFDNISAAQSMVETMISRGHKNIVYFTARMDKRTKLKMQGYEQAMRKYHLEPHSLITDEPSSFTLGAKQLQQALAQYPDIDGIFCTNDDLAIGALFECQRLGIKVPKEMAIAGFHGHDVGQSLTPQLATVITPRLEIGKVAAQELLNRLKGEPQQSSIINLGYQIHLGESI
Proteobacteria/Gamma	Pasteurellales	5045	49814	GntR	HSM_0170	B0UVN1_HISS2	U		Haemophilus somnus 2336	228400	Gluconate utilization	Gluconate	MPDKRKRPTLQDIASHLGITKMTISRYLRDPRLVAPKTGVRIAEAIEHFGYIPNRAPEILSNAKSKAIGVLVPSLTNHVFADVIKGIENITDQAGYQTMLAHYGYCQEKEEKRIESLLSYNIDGLILSETEHSARTLKMLDVANIPVVEIMDTSEFGLQQVVGFNNIAAAQSMVETMIKRGYKNIVYFSARMDKRTRLKMQGYEQAMKKHQLTPHSLLTEEPSSFTLGAEQLKLALKKHPQIDGIFCTNDDLAIGALFECQRQGIDVPKEIGIAGFHGLNVGLSLTTQIATVRTPRLNIGEVAAKELLNRIEGIVPENYMINLGYNIHLGESI
Proteobacteria/Gamma	Pasteurellales	5045	49812	GntR	MS1242	Q65T61_MANSM	U	*	Mannheimia succiniciproducens MBEL55E	221988	Gluconate utilization	Gluconate	MTKHKRPTLQDIANHLGITKMTISRYLRNPASVAEETGKRIAKAIEEFGYIPNRAPDILSNAKSRAIGVLVPSLTNQVFADVIKGIEEITDEAGYQTMLAHYGYSEKKEEQRIESLLSYNVDGIILSENSHSERTKKMLQVANIPVIEIMDTSEIGIQQVIGFDNIAAAQAMVETMIKRGYKKIVYFSARLDKRTQLKMQGYQQAMKKYQLSPRIIATKEHSSFTHGAELLHQALKQYPDIDGIFCTNDDLAIGALFECQRLGIKVPKQIAIAGFHGHDVGQSITPQLATVITPRLQIGRIAAQELLARLQNIPAQSSIINLGYQIHLGESI
Proteobacteria/Gamma	Pasteurellales	5045	49811	GntR	PM0791	Q9CMM7_PASMU	U		Pasteurella multocida subsp. multocida str. Pm70	272843	Gluconate utilization	Gluconate	MIKRKRPTLQDIATHLGITKMTISRYLRHPDSVAPETQAKIAQAIEHFGYIPNRAPDILSNAKSRAIGVLVPSLTNQVFADVIKGIELVSDKAGYQTMLAHYGYSMEKEEQRIESLLSYHVDGLILSENQHSERTLKMLEVANIPVVEIMECSEVGIQQAIGFDNIAAAQAMVETMIHRGHKNVVYFSARMDKRTCLKMQGYEQAMKKHGLQPYSLTTEQPSSFSLGAQQLHDALQQRPNLDGIFCTNDDLAIGALFECQRRGIKVPKQIAIAGFHGHDVGQSMTPQLATVITPRLEIGKIATQELLNRIHGMPQQSAIINLGYQIHLGESI
Proteobacteria/Gamma	Pseudomonadaceae	5049	49852	GntR	Avin_27300	C1DKQ2_AZOVD	U		Azotobacter vinelandii AvOP	322710	Gluconate utilization	Gluconate	MTTPKNDKNPRTTGRPTLNEVARRAGVSPITASRALRGIPSVAEELAQRVREAASELGYVANPAARALASARSQTVAVVVPSLGNQLFVETLEAIHAVMRPRGLEVLIGNSHYSRDEEEDLIRNYLAYQPRGLLLTGFERTESARRMLESSGIPCVYMMDLDSGAGLHCVGFSQIRAGAAAAEHLISRGRRRMAFVGAQLDQRTLLRGEGFRRALQQAGLYDPALELLTPRPSSVGLGCELFAQLMASHPQIDAIFFGNDDLAHGALLEAMRRGVKIPEQVAVIGFNDLPASSFTVPRLSSIRTPREAIGRRAAELLLALMAGQPIAEPVQDIGFELMAREST
Proteobacteria/Gamma	Pseudomonadaceae	5049	49845	GntR	PA2320	Q9I1F6_PSEAE	U	*	Pseudomonas aeruginosa PAO1	208964	Gluconate utilization	Gluconate	MSITKNDKNTRTTGRPTLNEVARRAGVSPITASRALRGVASVAEELAQKVRDAARELGYVANPAARALASAQSHSVAVLVPSLANLLFIETLEAIHAVLRPQGLEVLIGNFHYSRNEEEDLIRNYLAYQPRGLLLTGFERTESARRMIEASGIPCVYMMDLDSGSGLNCVGFSQLRAGEAAAEHLLARGRRRLAYIGAQLDQRTLLRGEGFRRALQKAGCYDPGLEILTPRPSSVALGGELFVQLLASQPQVDGVFFCNDDLAQGALLEALRRGVKVPEQIAVLGFNDLPGSDCTVPRLSSIRTPREAIGRRAAEQLLALIAGKEVRDSALDMGFELMAREST
Proteobacteria/Gamma	Pseudomonadaceae	5049	49846	GntR	PSEEN2422	Q1IAT7_PSEE4	U		Pseudomonas entomophila L48	384676	Gluconate utilization	Gluconate	MSRIGSRTTGRPTLAEVARLSGVSPITASRALRGVSTVAPELVEKVKVAAASLGYVANPAARALASARSQSVVVLIPSLSNQLFIDTLEAIHEVMRPRGLEVLIGNYHYDIAEEENLIRNYLAYQPCGMLLTGFDRSEASRQMLAASGVPCVHMMELGGGQGALSVGFSQFEAGRAAARHLIERGRRRLAFIAAQLDPRVMQRAEGFRQALADAGLQAPELEVLDPLPSSIGLGGALFSQLLARAPDVDGIFFCNDDLAQGAVLQALREGIEVPRQVAMVGFNDLPASAYMVPPLTSIRTPRAAVGRGAAQALLALLDGKRVGVEQQDMGFELVVRESS
Proteobacteria/Gamma	Pseudomonadaceae	5049	49849	GntR	PFL_4581	Q4K7W8_PSEF5	U		Pseudomonas fluorescens Pf-5	220664	Gluconate utilization	Gluconate	MTTHKNDKNTRTTGRPTLNEVARLAGVSPITASRALRGVSSVATELVEKVQKAAQELNYVVNSAARALASAQSQSVVVLVPSLSNLLFIETLEAIHQVLRPKGFEVLIGNCHYSRDEEENLLRNYMTYQPRGLLLTGFDRTESARRMIEANNIPCVYMMDLDSGAGLNCVGFSQLNAGETAAQHLISRGRKHLAYVGAQLDQRTLLRGEGFRRALQQAGLYNPDLELLTPRPSSVGLGAELFLQLMQSQPQVDAIFFGNDDLAQGALLEAMRCGIKVPEQVAVLGFNDLPSSEHMVPRLSSISTPREAIGRRAAEQMLTLLAGNSVAEPVVDMGFELRVREST
Proteobacteria/Gamma	Pseudomonadaceae	5049	49850	GntR	Pmen_2566	A4XVF6_PSEMY	U		Pseudomonas mendocina ymp	399739	Gluconate utilization	Gluconate	MSQRRRRSAERVTLSDVAKAAGCSLMSASRALSQPGRVSDALREQVMRAAQALGYVPNPAARALASSRSNLVAVVIPSLSNSVFVDTVEAIQRVLMPAGFEMMIGVSHYRVEEDERLLRSYLAHQPAGLLVTGFERSDAAREILGASTCPLVTLMELSDEPEDYCVGFSQIEAGAAMTRALVQRGYRHIAFAAAQLDPRTLQRAEGYRQVMRYLGRHDPALELLTPELSSIGLGAELLDRLLAQQPQIDAVFFNNDDLAMGALFRARQLGLEVPGRLAIAGFNDLPAAAWMHPALSTVRTTRGRIGELAANMLLALMRGETPEQHCIDVGFELVMRDSA
Proteobacteria/Gamma	Pseudomonadaceae	5049	49847	GntR	PP3415	Q88HE5_PSEPK	U		Pseudomonas putida KT2440	160488	Gluconate utilization	Gluconate	MSRTGSRTTGRPTLAEVARLSGVSPITASRALRGVSTVAPDLVEKVIAAAANLGYVANPAARALASARSQSVVVLIPSLSNQLFIDTLEAIHEVMRPRGLEVLIGNYHYDLAEEENLIRNYLAYQPCGILLTGFERSDAARQMLVASGVPCVHMMELNGEPGALSVGFSQHQAGRAAARHLIERGRKRLAFIAAQLDPRVMQRAEGFRQALAEAGLQAAELEVLAPEPSSIALGSVLFSQLMQQAPDVDGIFFCNDDLAQGAVLQALRQGVEVPRQVAMVGFNDLPASAHMVPRLTSIRTPRAAVGRGAAQALLALLDGKRVTNAQQDLGFELMVREST
Proteobacteria/Gamma	Pseudomonadaceae	5049	49851	GntR	PST_2198	A4VLL0_PSEU5	U		Pseudomonas stutzeri A1501	379731	Gluconate utilization	Gluconate	MPHPAARSLASSRSNLVAVIIPSLSNAVFVDTVEAIQRVLMPAGYEMMIGVSHYRPEEDERLLRAYLAHQPAGLLLTGFERSEAARAVLASYTAPRVTLMELSDQADNYCVGFSQLQAGAAMTRTLLERGYRHVAFAAAQLDPRTLQRAEGYRQAMREAGRYEPTLELLTPQLSSIGLGAELLDRLLAQHPQIDAVFFNNDDLALGALFRAHQLGLEVPGRLAIAGFNDLPAAAWMHPALSTVRTRRGEIGELAAQMLLSLMRGQQPAERCIDVGFEVVMRDSA
Proteobacteria/Gamma	Pseudomonadaceae	5049	49848	GntR	PSPTO3563	Q87Z68_PSESM	U		Pseudomonas syringae pv. tomato str. DC3000	223283	Gluconate utilization	Gluconate	MTRIGSRSTGRPTLNEVARLAAVSPITASRALRGVATVAPELVEKVRAAAQSLGYVANPAARALASSCSQTVVVLVPSLSNQLFIETLEAIQDVLRLRGLDVVIGNYHYSPEEEEKLLRNHLVNRPRGVLLTGFDHTAASRQMLETSGVPCVHMMELDTRLGAYCVGFSQQQAGAEAARHLLGRGRKRLAYMAAQLDPRVLQRGAGFRQVLEEAGVFDPALQVSTRQSSSIGLGGELFARLLDEHPDVDGVFFCNDDLAQGAALEALRLGVAIPERVSLVGFNDLPGSAHMVPRLTSIRTPRQEVGQRAAQLLLGLLDGITQHPQVDLGFELVVRESS
Proteobacteria/Gamma	Psychromonadaceae/Aeromonadales	5047	49830	GntR	AHA_0290	A0KF02_AERHH	U	*	Aeromonas hydrophila subsp. hydrophila ATCC 7966	380703	Gluconate utilization	Gluconate	MNDTRKRRPTLQDIADLTGVTKMTVSRYLRDPQAVAEGTRERIAAAVEELGYIPNRAPDILSNATSKAIGILIPSLSNQVFSAVVHGIESVTRPAGYQTLLAHYGYSPEREEEQVASLLSYHVDGLILSDSQHTERTRKMIATAGIPVVETMDLPQSPIDMVVGMDHRAAARAMVTEMLHRGRRKLVYLGARLDVRTQLRMEGYYQAMQDFGLSGQHLLTEQSSSFTLGGQLLEQALVRYPDLDGLFCTNDDLAVGALLQCQAKWIPVPQQIAIAGSNALDIGHAMTPKLASIVTPRKEIGRAAATMLLARLNGQPLADTRLDMGFSLYEGDSLG
Proteobacteria/Gamma	Psychromonadaceae/Aeromonadales	5047	49831	GntR	ASA_4107	A4ST26_AERS4	U		Aeromonas salmonicida subsp. salmonicida A449	382245	Gluconate utilization	Gluconate	MNDTRKRRPTLQDIADLTGVTKMTVSRYLRDPHAVAEGTRERIAAAVEELGYIPNRAPDILSNATSKAIGILIPSLSNQVFSAVVHGIESVTRPAGYQTLLAHYGYSPEREEEQVASLLSYHVDGLILSDSQHTERTRKMIATAGIPVVETMDLPQAPIDMVVGMDHRAAARAMVTEMLRRGRRKLVYLGARLDVRTQLRMEGYYQAMADFGLTGQHLLTEQSSSFTLGGQLLDQALVRYPDLDGLFCTNDDLAVGALLQCQAKWIPVPQQIAIAGSNALDIGHAMTPKLASIVTPRKEIGSEAATMLLARLSGQPLPDTRKDMGFSLYVGESLG
Proteobacteria/Gamma	Psychromonadaceae/Aeromonadales	5047	49829	GntR	PE36_03029	A6FDU3_9GAMM	U		Moritella sp. PE36	58051	Gluconate utilization	Gluconate	MSSNSRKSGRVTLQDVANKVGVTKITVSRAIRTPEKVSESLRLSIHKAIDQMGYVPNRAASMLSAKQSKTIVLIVPSLSNGVFADVVRGINDVMLNQGFQILLGHSGYSLLEEERLIETYLQFGIDGIIISGTHHTERSNRLLRKSNLPVVEIMECNENAIDMSVGLDHAQAGYKMTQHLIGKGYKNIGFAGARMDLRAQLRLDGWRKAIWETELSDARVLTSSYASTYQMGADMLTEILGEWPDTDCIFFCNDDLAAGALFECQRRNLKVPKDIALVGFNDLDICSATNPKLTSVCIPRFDIGEQAAKLLLKRINDEPIESKHLDLGFIISERAST
Proteobacteria/Gamma	Psychromonadaceae/Aeromonadales	5047	49827	GntR	Ping_2929	A1SYR6_PSYIN	U		Psychromonas ingrahamii 37	357804	Gluconate utilization	Gluconate	MDNIMSKKKRPTLQDVANIVGVTKMTVSRYLRDPSLVSSAIQAKIAVALEELGYIPNRAPDLLSHAKSHAIGILVPSLTNQVFSEVIRGIEKVTKAAGYQTMLAHYGYSAELEEERISFLLSYHIDGLILSDSYHTARTLKMIKTAGIPVIEMMDAASPAIEQAVGVDNLEAGYQMVSAMIGRGYKNIVYLGARLDARTQFRQQGYEKAMQEHGLVAKSVMTEAPSSFTLGAELLTRAMAEHPQTDGLFCTNDDLAVGAIFEAQRCGIKIPDQIAVAGFHGHNVGQSMVPKLATVITPREKIGQVTAEQLIARLNGQAIKHKVIDLGFKIQLGESI
Proteobacteria/Gamma	Psychromonadaceae/Aeromonadales	5047	49832	GntR	Tola_0775	C4LBG8_TOLAT	U		Tolumonas auensis DSM 9187	595494	Gluconate utilization	Gluconate	MSQKHRRPTLQDVADRVGITKMTVSRYLKDPALVSAAAQEKIAAALDELGYIPNRAPDLLSNAKSKAIGVLLPSLTNQVFAEVIRGVEAITEPAGYQTMLAHYGYSSEVEQERIASLLSYHVDGLILSESYHSERTLRMIQTAGIPVVEIMDSRSPVIEQAVGFDNAAASYAMTELMLQKGYRRIVYFGARMDVRTRLKMEGYAAAMQAHGLEPLSMATDAASSFSLGARLLLDARARYPDMDGIICTNDDLAVGAIFECQRQGIAIPEEIGIAGFHGHDIGQAMVPKLASVITPREAMGRVAAEQLLARINGAELTEPVIDLGFELSAGQSI
Proteobacteria/Alpha	Rhizobiales	5055	49906	GntR	Xaut_1236	A7IEP2_XANP2	U	*	Xanthobacter autotrophicus Py2	78245	Gluconate utilization	Gluconate	MPLSVPAIKRKNAPMSQRSSSGSSGNPSRGSRASGRPTLAELAQIAGVSPITASRALRGVASVDPDLAKRVREAAAALNYVANPAARTLASAHSDAVAVLIPSLSNLLFIDTLEAIHDVLMPRGLEVLIGNFHYSPEEEEKLVRNYLAYQPRGILLTGLEQTPATRSLLKASGIPVVYMMELSREMGVHSVGFSQEESGAAVARHLLARGRRHLAYVAAQLDPRALERGLGFQRVLAGEREVRPPVWLSVPEPSSVALGGELFVRLLEAYPDIDGIFFCNDDLAQGAIFEATRRQVPIPGRVAVVGFNDLPLSAHMAPRLTSIRTPRAKVGEAAARRLVALMEGDCRAEPAIDLGFELVERESS
Proteobacteria/Alpha	Rhodospirillales	5057	49925	GntR	AZL_d00370	D3P5D4_AZOS1	U	*	Azospirillum sp. B510	137722	Gluconate utilization	Gluconate	MKPRKPRSSRTGRATMADVAERVGVSAITVSRAFKRPELVAPELRQRILDTAQSMGYVPNQAASALASARSMTVAVLIPSMTNMVFVETLAGIHDMLLPRGYRALIGVTHYSPEEEERLVRTYLQFQPEGILLTGTDHTQATRNYLSALSSPMVHMMELLDEPGSLSVGCSQEEGGRLMTSHLLARGYRRIGFVAVQLDPRTLSRLDGYRRTLEEAGLYDETRVWRLPDPSSIQLGAAMIDRLMAENSDCDAVFFCNDDLAQGALFQCQRRGIRVPDQLAIAGFNDLPASAWTTPTLTTVATPRYAIGRHAAAMLLDLMDGKEPPRHRLDLGLTFIAREST
Proteobacteria/Gamma	Shewanellaceae	590	5514	GntR	Sbal_4089	A3D9Z2_SHEB5	U	*	Shewanella baltica OS155	325240	Gluconate utilization	Gluconate	MNKKRRPTLQDVADQVGITKMTVSRYLKNPTRVAQSTQEKIAIALETLGYIPNRAPEILAQATSRAIGVLVPSLTNQVFAEVLRGIENVTGKRGYQTMLAHYGYQAELEEERVASLLSYNIDGLLLSESYHTPRTVRMIETAGIPVIEMMDSVSPSIQQCVGFDNTAAAYEMVKAMIAQGYRHIAYLGARMDIRTQLKMRGYELAMQEAKLTPLTMTTNEASSFSLGASLLQQTLAKYPYVDSFFCTNDDLAAGVIFECQRQGIKIPEQIGVAGFHGHDIGQSMTPKLASIITPRKEIGRIAATELLDRLNGKEIAESVIDLGYRIDLGETL
Proteobacteria/Beta	Various betaproteobacteria	5054	49886	GntR	CV2956	Q7NTU7_CHRVO	U	*	Chromobacterium violaceum ATCC 12472	243365	Gluconate utilization	Gluconate	MSRKPRVRSGSGVTMHDVAKAAGVSAITVSRVLNQPQQVSEQLREKVMQAVDALAYVPSRSASTLASAKSRTVLVLIPSLANTVFLETLTGIETVLDAAGYQMLIGNSHYDAGQELQLLRAYLQHRPDGVLITGLSHAEPFERILSQHALPVVYMMDLADDGRCCVGFSQEDAGAAITRHLLSRGKRRIGFLGAQLDERVMKRLDGYRAALDAADCRDAGLEWLDPQPSSMQMGADMLDRALAERPDCDALFCCNDDLAIGALARSQQLGIAVPERLAIAGFNDLQPAAWCTPPLTTVATPRRDIGVHAAKALLQLIDGEEPASRRADLGFRLMLRRSS
Proteobacteria/Gamma	Vibrionales	5044	49807	GntR	VAS14_06913	Q1ZR95_PHOAS	U		Vibrio angustum S14	314292	Gluconate utilization	Gluconate	MTTKPKHRPTLNDVAKQVGVTKMTVSRYLRDPSSVAESTREKIAVVVEELGYVASRAPDILSNRNSKAIGILLPSLSNQVFASLLQGIESVTKKEGYQTLITHYGYSAEEEEEKIASLLSYHVDGLILTESIHSERSYKMINAAAIPVVETIDLPEHPIDMAVGLDHKQAAFDLVSKMIEYGRCNIVYFAARLDRRTQLRCDGYIQAVEVKGLTPRIVSTEEHSSFTQGRELMRQALAQHPELDAVFCTNDDLAIGAMMHCQEHNVAIPSQVAIAGYNALDIGKAISPTLASVNTPREEIGAAAATLLLKKLAGKKVANPIQDIGYSLYLGESLGKPKVESK
Proteobacteria/Gamma	Vibrionales	5044	49799	GntR	VC0289	Q9KV68_VIBCH	U	*	Vibrio cholerae O1 biovar eltor str. N16961	243277	Gluconate utilization	Gluconate	MTKKQRATLQDVADQVGVTKMTVSRYLRSPDSVAAATREKIALAVEALGYIENRAPAMLSKSSSKAIGILLPSLSNQIFASFVQGIEAVTKANGYETLLAHFGYDEEEEERKIASLLAYQVDGLILTESHHTQRTLQMIASSGVPVVETMELPANPIDMAVGMDHVEASYQAVKKIIAAGKRSIAYFGARLDTRTKLRMQGYDQAMQEAGLPIKHVLTGSHSSFSLAAQLLDEAFARYPDLDGVFCTNDDIAIGTLLVAQQRGIRVPEQLSVIGYNALDIGRTITPKLTSVDSPRYAIGEKSAELLIAALKGERAEQQVVDMGYRFTAGESV
Proteobacteria/Gamma	Vibrionales	5044	49801	GntR	VIBHAR_00507	A7N1A2_VIBCB	U		Vibrio harveyi ATCC BAA-1116	338187	Gluconate utilization	Gluconate	MAQQNKKARTTLQDVADKVGVTKMTVSRYMRNPESVAEKTRVKIAAVIEEMGYIENRAPAMLSKSSSKAIGILLPSLSNQIFASFVQGIETVTKANGYETLLAHFSYDELEEERKIASLLSYQVDGLILTESHHTQRTLQMIKNAGVPVVETMELPEQPIDMAVGMDHEDASYSVVKRMLESGKRTIVYFGARLDTRTKLRMQGYDRAMIEAGLEPKHVLTGDHSSFSLAHDLLERALATYPELDGVFCTNDDIAIGTLLSAQQRGINVPDQLAVVGYNALDIGQTISPKLTSVDTPRFEIGEKSAELLIARLKGEEQAETVVNMGYQITAGESV
Proteobacteria/Gamma	Vibrionales	5044	49802	GntR	VP0058	Q87TL1_VIBPA	U		Vibrio parahaemolyticus RIMD 2210633	223926	Gluconate utilization	Gluconate	MILLWILCLAFGGLSASCVFVIMLHVTLLINHIFMAQQNKKTRTTLQDVADQVGVTKMTVSRYMRNPESVAEKTRVKIAAAIEEMGYIENRAPAMLSKSSSKAIGILLPSLSNQIFASFVQGIETVTKANGYETLLAHFSYDELEEERKIASLLSYQVDGLILTESHHTPRTLQMIKNAGVPVVETMELPPQPIDMAVGLDHEDASYNAVKRMLDAGKRTIVYFGARLDTRTKLRMQGYDRAMNEAGLEPKHVLTGVHSSFSLAHDLLERALKTYPTLDGVFCTNDDIAIGTMLSAQQRGIQVPQQLAVVGYNALDIGQTISPKLTSVDTPRFQIGVKSAELLIARLKGEAQEEKVFDMGYQITSGESV
Proteobacteria/Gamma	Vibrionales	5044	49806	GntR	VSAL_II0668	B6ERT8_ALISL	U		Vibrio salmonicida LFI1238	316275	Gluconate utilization	Gluconate	MSNLHTQRKTRPTLQDIADRVGVTKMTVSRFIRDPNSVAEKTREKISAMINELGYIQNRAPAMLSKSSSKAIGILLPSLSNQVFANLVQGIEQVTKERGYQTLIAHCNYDELEEEEQISFLLSYQVDGLILTETKHTDRTRQMLKSAGVPVVETMELPENPIDMAVGLDHMEAAYHVVTQMIASGKRHIMYFGARLDTRTKLRRQGYDKAMIEAGLLARHILTDEHSSFTLGGALLIEGLELMPELDGIFCTNDDIAIGAMMECAHRGISVPNDISIVGYNALDIGQAISPRLVSVDTPRFDIGKKSAELLLDALANKRQDQKVVDMGFSLTEGDSL
Proteobacteria/Gamma	Vibrionales	5044	49803	GntR	VSAK1_19449	A6CWH0_9VIBR	U		Vibrio shilonii AK1	391591	Gluconate utilization	Gluconate	MTMEAKRSRPTLQDIADRVGITKMTVSRYMRNPDSVAQATRDKIAQVVEELGYIHNRTPAMLSKSSSKAIGILLPSLSNQVFSSFAQGVEHVTNLNGYDTLIAHYSYDRDVEEKKIESFLSYQVDGLILTDTNHTERTLQMIKTAGIPVVEAMDLPVNPIDMAVGLDHMQAAYEVVTQMIAKGKRNIAYFGARLDTRTQLRMHGYDKAVTEAGLEPLHVLTKEHSSFALGSTLLDKALLIQPELDGVFCTNDDIAIGTIMACRAKQQRVPEDISVVGFNALDMGKVISPTLASIDTPRFEIGKKSAELLLSALSGAPSEQKVFDMGFTITEGESL
Proteobacteria/Gamma	Vibrionales	5044	49804	GntR	VS_II0411	B7VR26_VIBSL	U		Vibrio splendidus LGP32	575788	Gluconate utilization	Gluconate	MLSKKKRPTLQDVANLVGVTKMTVSRCLRDSSLVSEALRDKISAAVDELGYIPNRAPDILSNAKSNAIGVLVPSLTNQVFAEVIRGIEQVTAPAGYQTMIAHYGYSAELEEQSIASLLSYNVDAIILSENVHTDRARKMLQTVSIPVIEIMDSVSPRIEQAVGFDNFEAARAMTKTMLDRGRTNIAYLAARMDERTRLKMAGYEHAMQEADKTPVTLQTEDASSFTLGAKLIGELLDKHPEVNGIFCTNDDLAIGAFYECVRRGIQVPEKMAIAGFHGHDITVAMTPRLATVVTPREQIGKVAAQQVVARLQGNKEWVAKLDLGYEIEVGESI
Proteobacteria/Gamma	Vibrionales	5044	49800	GntR	VV1_1098	Q8DDA7_VIBVU	U		Vibrio vulnificus CMCP6	216895	Gluconate utilization	Gluconate	MAQHNKKPRTTLQDVADQVGVTKMTVSRYMRNPDSVAEKTREKIATAIEQMGYIENRAPAMLSKSSSRAIGILLPSLSNQIFASFVQGIETVTKAHGYETLLAHFSYDELEEERKIASLLSYQVDGLILTESHHTERTMQMIKNAGIPVVETMELPAQPIDMAVGLDHEDASYSVVKRMLASGKRTIVYFGARLDTRTKLRMQGYDRAMREAGLEPKHVLTGEHSSFSLADELLERALATYPEMDGVFCTNDDIAIGTLLCAQQRGIEVPKQLAIVGYNALDIGQTIRPKLTSVDTPRFQIGEKSAELLLARLRGETLEQNVVDMGYRITAGESV
Firmicutes	Bacillales	5306	52140	GntR2	RBAM_018000	A7Z587_BACA2	U		Bacillus amyloliquefaciens FZB42	326423	Gluconate utilization	Gluconate	MKTITISDVAKYANVSKSTVSQFLNQRYDYMSEKTKQKIEAAIQELNYQPNFVARSLKQKSTFTVGVVVANILHTFSTQVIRAVEDYFHEQGFHIIVCNADDEPEKEKKYIEMLRAKQVDGIIIFPTGENLSLYEKMKRDTFPVVFMDRTIEELGIPTVMLDNHHAAGLAVDRFIESGIKRIAIITTSIIREISPRVERIEGYKKALDRHGMMVRDEYIKTADAADISNVLSELFSLEEPPKAILAANDIVLVEVLKYMKEHDMTIPDKAAVIGIDEVPFAGFFTPPITTIVQPAAEMARKAGSLLLRQIQEKDGGEKRIHRYKPVLLARQSG
Firmicutes	Bacillales	5306	52142	GntR2	ABC3358	Q5WCL9_BACSK	U		Bacillus clausii KSM-K16	66692	Gluconate utilization	Gluconate	MASVTMADVAKLAGVSKSTVSQFLNKRYHYMSEETKSRIEQAIHELGYSPNAVARSLRQKKTQTIGVIVANILHSFSTEVIRAIEDTCHAYDVHVIVCNADNDPQKEKKYVEMLRAKQVDGLIVFPTSDNKELFNGLVAAHFPLVFIDRLIHGVPVNAVLADNEEAMRLAVNALAESGRRRIGLVLPPLLEEITPRMERRDGFMKAISEAGLEYEEAYVAAGQVEEAPHFLADMLALPTPPDAVIAGNDLILYELLRSIKQQKIDVPEQIALIGIDDVTFADFFNPSITTVAQPTFAMGHKAAELLLQEINGGKKHSEIRTHRFQPTLKCRQSC
Firmicutes	Bacillales	5306	52147	GntR2	GK1942	Q5KYK9_GEOKA	U	*	Geobacillus kaustophilus HTA426	235909	Gluconate utilization	Gluconate	MKKVTMADVAKLANVSKSTVSQYLNKRYEYMSEETRKRIAQAIEELGYQPNVIARSLKQKTTATIGVIVFNMLHMLTTQVLHAIEEECQKRGFQVIVCNSGDDPEKEKKYVDMLLAKQVDGLIVFPTGKNEEVYRRLVEERFPLVFVDRMVPGVEADSVLLDNAGAAEMAVHYFTSYGYERIAIVTPPLVPYNVPRMERFEGFRAAMRKRGLDVEDRNIIVADPDALPEVLKQRFAEPKRPNALFAINDLTLMGVLRFVKETGIRMPAELAIINIDDVPFADIYTPALTTIAQPTFAMGKKAAERVFDQMKAKKTDGPRVFRFSPVLMERTAIRREKA
Firmicutes	Bacillales	5306	52148	GntR2	OB2705	Q8EMY5_OCEIH	U		Oceanobacillus iheyensis HTE831	221109	Gluconate utilization	Gluconate	MTKRITISDVAIHAGVSKSTVSQYLNGRYDYMGQKTKEKIQSAIKELKYSPNMVARSLKQKSSTTIGVIVANILHVFSTQVIRAIEDFCHEKGFHVIVCNADDNPDKEKTYIDMLRAKQVDGIIAFPTGDNVALYQGLLEEQYPLVFMDRLVDGLDIPTVLLDNDKAATLAVDLLKDYQRPAIVTPPLKENLTPRMERLIGFKNELAKHGVSLPDEYIACGEISEIQKKLTELFQLTKAPDAIFAINDRVLHEVLTFMNHQHIRIPEDVALVNVDDVSFAEFYQPALTTISQPAFEMGKKAAELLFTQIKNPQDRSTMETFRFEPMVNRRKSC
Firmicutes	Lactobacillaceae	4610	44547	GntR2	LAF_1049	B2GCK3_LACF3	U	*	Lactobacillus fermentum IFO 3956	334390	Gluconate utilization	Gluconate	MRRLTITDVAREAGVSTTTVSRYLNGHFEKMGEETKERVAKTIKRLNYAPSASAQKLRQNESHLVGVLVGEISNPFSSLLSKGIYDVLQGAGYDILLMNADNSTATEARALQRFVAQQVDGVIAQPSAIHFSQFQTLTDANIPLVLVDREVPDQPATVGRVTSANQDACYYLGPTLVERGYQNIITVSAHFAEASGQIPRIAGFQKASRTFGFNYSNIETKGHDKDWLRATLSHQLARLTGRTVIISLMGPVLFDLLAVFKELGLKFPKDVGLVSFDDWEWSRYVSDDGIFLLRQDMELMGNMAATALLKQLQTKTLTSPTTLLPVTTIDRPSL
Firmicutes	Lactobacillaceae	4610	44551	GntR2	LAR_0764	B2G748_LACRJ	U		Lactobacillus reuteri JCM 1112	557433	Gluconate utilization	Gluconate	MTQHTTIADVAKAAGVSVTTVSRIINGRYDKMRPATRKRVEKAIKDLHFVPTASARQLRQTHSHVVGILVGDISNPFSSLLAKGIDDVLQQAGYDILLMNTNNSRENESRALQRLYQQRVDGIIVQPNSRHFSQFAPAIHNDIPLVIVDREVDDQPSTVGKVTSANRDACYNLGKILYQNGYQNILTVSAHFAEASGQIPRIAGLKVAAADNGLSYHNIETRGHDRQWLAKTFLQQLNELKGKTAVVSLMGPILFDLLAIFKELNLSFPEDLGLVSFDDWEWSQYVANGIFLLKQDMELMGSLAANKLLTQINQQSTISSTTLLPVEIIAHQSL
Proteobacteria/Beta	Ralstonia	5262	51825	HpxR	RALTA_B0723	B3R8I5_CUPTR	U		Cupriavidus taiwanensis	164546	Xanthine utilization	Xanthine	MTQSTPDRPRRITIHDVARAAGVSLTTVSHALNDRGVLDPATRARVKRVAAELGYRPSVRAQRLQSGRANCIALLSSMPFAVAGGTSRLGFMMEVAAIAAEAAMGRGLGVVLVPPLEGAGGLLDTLDIDGAIVIEPIAGDPHIARLRERGVSIVSIGREPLTDTPVPCVDLQSYETARLLLAHLHGHGRRRIGLMIGAAPRQSYVETERAYREFTQALGLPCHVVKAAEEHGEAAGAEACAQLLAKMPGMDALCAPVDAFAVGAMAHLQALGKRVPADVLVVTRYDGIRARSAQPPLTAVNLHLERVASLAVELLFAHLSGERGRTVITGPKPELVVRASSIPGA
Proteobacteria/Beta	Ralstonia	5262	51826	HpxR	H16_B0864	Q0K2W8_CUPNH	U	*	Ralstonia eutropha H16	381666	Xanthine utilization	Xanthine	MSRMTESTPDRPRRITIHDVARAAGVSLTTVSHALNDRGVLDPATRARVKRVAAELGYRPSVRAQRLQSGRANCIALLSSMPFAVAGGTSRLGFMMEVAAIAAEAAMGRGLGVVLVPPLEGAGGLLDTLDIDGAIVIEPIAGDPHIARLRERGVSIVSIGREPLTDTPVPCVDLQSADTARLLLAHLHGHGRRHIGLMIGAAPRQSYVETERAYREFTQAMGLPCHIVKAAEEHGEAAGADACAQLLAQMPALDALCAPVDAFAVGAMAHLQALGKHVPDDVLVVTRYDGIRARSAQPPITAVNLHLERVASLAVELLFAHLSGDRSRDVITGPAPELVVRASSTPGV
Proteobacteria/Beta	Ralstonia	5262	51827	HpxR	Reut_B4528	Q46SK6_CUPPJ	U		Ralstonia eutropha JMP134	264198	Xanthine utilization	Xanthine	MYPPGTASRNGMSDSIRPPPSERTGKPRRITIHDVARAAGVSLTTVSHSLNDRGVVDPATRARVKRIAAELGYRPSVRAQRLQSGRANCIALLSSMPFAVAGGTSRLGFMMEVAAIAAEAAMARGLGVVLVPPLEGAGGLLETLDIDGAIVIEPLAGDPHIARLRERGVSIVSIGREPLTDSPVPYVDLQSADTARMLLEHLHTHGRKQIGLMIGDAARQSYVETERVYREFTQANGLPCTLVKAPEAQGEAAGAEACAQLLAQLPSLDALCAPVDAFAVGAMEHLNKSGKRVPDDVQVVTRYDGIRARTAHPPLTAVNLHLERVAALAVDLLFAHLSGDRSRQTVVGPAPELIVRASSA
Firmicutes	Lactobacillaceae	4614	44604	HxlR	LVIS_0444	Q03T70_LACBA	U	*	Lactobacillus brevis ATCC 367	387344	Hexulose metabolism	null	MARKANKNANIKDVAALAGVSIATVSRFLNGNLGRMSAATATKVQEAITKLNYVPNSVARQMITQSSKLIAVIVANIDDYFSTELFKGISSILESRGYIGVLFDANADIEREKTLLRAIGSRGFDGLILQSFSNPQTVQEILHQQMPVVSVDREMDACPWPQVVTDNFEAAKAATTAFRQQGYQHVVVLTSELELSRTRQERYRGILAAAQDVDVLEVSESSYNHSEVHQRLTQLITQNDQKTVAFALKERWLLEFFPNLIISGLIDNQTVTATGFADTDFIRRMEPKLTLITQNPFLMGASSAEIMLRQLAGEKVAPEKMVIPAKLQ
Firmicutes	Lactobacillaceae	4614	44616	HxlR	OEOE_0125	Q04HF2_OENOB	U		Oenococcus oeni PSU-1	203123	Hexulose metabolism	null	MAGVSIATVSRFLNGQLNRMSKKTADRIAKIIQETNYVSNASARQLVTKNSGIVAVVAADIDDYFSTEFFKGASSVLEQHHLNAVLFDSNSRLNREKQNLKFINQQTFDGMILQPLTDKSQFVKELVRRPIKTVILDRDLHDDSWDSVQTNNFQAAREASLYFYKNSFTKIIVISEPVTGISTRQERLKGIQTVYPNVQLIEIDNDRPFLKKNYEKVSNLLKKNQVKGEKTLFFFLKERLLLNFFSFFYKKVF
Proteobacteria	Enterobacteriales	4627	44773	IdnR	CKO_02791	A8AK84_CITK8	U		Citrobacter koseri ATCC BAA-895	290338	Idonate utilization	5-dehydro-D-gluconate, L-idonate	MQSLAGCVKVLCELITLSFAENFMKNNRMTLQDIATLAGLNKMTVSRYLRDPNQVSQRSRELISKIMEENNYIPNRAPEILLNARSKTIGVLIPSFRNQIFADVLAGIESVTSAHQYQTLIANYEYDPEREEREVLNLLSYNIDALILTGKQHTERMVQYVRASGIPVAELMDITEHCLDMQVGIDNEKAAWDMTQAFLEAGKRAVAFFGSMDDPRDVSRYRGVERALNEQGLQPYHVVPKAISSLALGRQLFLQTMRDRPDINAIFCTNDDLAVGALLECQSQQIPVPQQVAIAGFHGLEIGRARLQKIASVITPRYDMGSVAADMLIKRLGGKETLDRVNLGYQIYYGDTL
Proteobacteria	Enterobacteriales	4627	44778	IdnR	b4264	U6NDX7_ECOLI	U	*	Escherichia coli str. K-12 substr. MG1655	511145	Idonate utilization	5-dehydro-D-gluconate, L-idonate	MRNHRISLQDIATLAGVTKMTVSRYIRSPKKVAKETGERIAKIMEEINYIPNRAPGMLLNAQSYTLGILIPSFQNQLFADILAGIESVTSEHNYQTLIANYNYDRDSEEESVINLLSYNIDGIILSEKYHTIRTVKFLRSATIPVVELMDVQGERLDMEVGFDNRQAAFDMVCTMLEKRVRHKILYLGSKDDTRDEQRYQGYCDAMMLHNLSPLRMNPRAISSIHLGMQLMRDALSANPDLDGVFCTNDDIAMGALLLCRERNLAVPEQISIAGFHGLEIGRQMIPSLASVITPRFDIGRMAAQMLLSKIKNNDHNHNTVDLGYQIYHGNTL
Proteobacteria	Enterobacteriales	4627	44782	IdnR	STM4481	Q8ZK25_SALTY	U		Salmonella typhimurium LT2	99287	Idonate utilization	5-dehydro-D-gluconate, L-idonate	MRNHRISLQDIATLAGVTKMTVSRYIRSPKKVARETGERIAQIMEEINYIPNRAPAMLLNAQSYTLGVLIPSFQNQLFADILAGIESVTSGHNYQTLIANYNYNRDSEEESVINLLSYNIDGIILSEKYHTLRTVKFLRSATLPIVELMDIQGDRLDMEVGFDNRQAAFDMVSTMLDKRQRRKILYLGSKDDIRDEQRYHGYCDAMTRRGLAPLRINPRAISSIHLGIQLMRDALTAHPDVDGVFCTNDDIAMGALLWCRERQLAVPEQISIAGFHGLEMGRQMIPSLASVITPRFEIGRRAAQMLLNKIKNNDLNHNTIDLGYQIYHGSTL
Proteobacteria	Enterobacteriales	4627	44783	IdnR	Spro_3289	A8GGZ7_SERP5	U		Serratia proteamaculans 568	399741	Idonate utilization	5-dehydro-D-gluconate, L-idonate	MKNQRVTLQDIALLAGVTKMTVSRYLRTPDKVAAETAAKIAQVMKEVNFTDSDEARSSQKPRIGVLIPSFNNQIFADLLAGIESITLEHGYQTLVVNYDYSRQREEEQIIQLLAYPIAGLILTDSEHTLRAEKYLAATKIPVAQVMSLEGPEGRIAVGFDNYQAGFDMTEALLASGKRQVVYFGAMSDARDTKRFQGYCRAMENQGLTPRQITPHRVSSVSVGSDMLAMARQLYPSLDGILCTNDDLAVGVLQACLRLGLKVPQDIALSGFHGLDIGKATTPGIASVITPRFDMGKVATEILLKRIKGVPCIERVDLHYRISLGGTI
Proteobacteria/Alpha	Rhizobiales	5572	54615	IdnR	Atu4685	Q7CVK9_AGRT5	U	*	Agrobacterium tumefaciens str. C58 (Cereon)	176299	Idonate utilization	L-idonate	MTVSRVLADPALVSEDTRQKVMKAIEKLGYVPDRIAGSLSSRRTNFITAILPTLTNSNFADSAQGLANALRAADYQLLIGYTMYDLLEEERVIRTMMERRPDAIVVAGTVHTKMASEVLMRAGIPIVEIWDVPEHPIDHAVGFSNYEVGRTAAKHLISLGFTKIGALGSRADGDVKDWRGESRLLGFSAALREAGISDDLIIREGSAPVSYDHGAKTLGSLLAKAPDVEAIFAVSDISAVGALMECHRRGIHVPDRISILGFGDFDIGRQCYPAISTIRVDAQMIGRKAGELLLSILEPEKDAVVPEGARVDVGFELIVRETTKRLGG
Proteobacteria/Alpha	Rhizobiales	5572	54616	IdnR	AZC_2611	A8IB53_AZOC5	U		Azorhizobium caulinodans ORS 571	438753	Idonate utilization	L-idonate	MPPLTRKPTMRDVSRLAGVSTMTVSRVLADPETVSRETRSRVLAAVEQLGYVPDRVAGSLSSRRTNVVAAILPTLTNVNFADTAHALTEVLRPADYQLLIGYTMYRLDEEERLLRAMLPRRPDAVVVASSVHTKTASQMLLRAGVPVVEIWDNPGQPIDHAVGFSNYEVGRAAAHHLISLGHRRIGALGPGRDGEARDFRGEDRMKGFAAALREAGLSDEWVLHFGDVPVAFDHGRQSFAAMLERAPDVEALFAVSDISAWGALMECQRRGIRVPDDLSLLGFGDFDFGRQCVPMLSTMGIDARAIGTAAGELLMRLLHDDSGAAAAPERIDVGFRLIERETTAPSRKRRKNGRKSS
Proteobacteria/Alpha	Rhizobiales	5572	54619	IdnR	BBta_0778	A5EA48_BRASB	U		Bradyrhizobium sp. BTAi1	288000	Idonate utilization	L-idonate	MKQTRTTINRSPRRPATMAEVAARAGVSTMTVSRALKRDGAVSEETRRRILAAVEELGYVLDLSAGALSSKRTGFVAVLVPSINNSNFADTARGITEVIEDQGLQVLLGATDYDIEKEEHLVQTMLTRRPDGIIVTDGRHTPRARRMLQAAGIPVVEIWDLPAEPIDHVVGFSNAEASRALVRRLYQKGYRKIGFIGGASRRDSRGADRRLGYLRAIEELGLPVGRTIAFGDPPISMEQGGQAIVHLIEQWPDVDAAVCVSDLSAFGAIMECHRRGWAVPGRIGIAGFGDFEVSRWAWPRITTVAVNCRTIGLEAGRILLGALDDVQRKRTPMPATLIVPFEVIEREST
Proteobacteria/Alpha	Rhizobiales	5572	54624	IdnR	RHE_PC00141	Q2K1I8_RHIEC	U		Rhizobium etli CFN 42	347834	Idonate utilization	L-idonate	MAEVAKYVGVSAMTVSRAFRQDASVSEETRKRIMEAVDALGYVLDLSAGSLSSRRSGFIAALVPSINNSNFSDTARGITDALENTGLQLLLGYTDYAAEKEEKLIEAMLRRRPEGIILTGGSHTERARRMLDKAGIPVVETWEIPEEPINHVVGFSNSEAMSLLVRTLASQGYRRFGYIGGTTARDTRGSQRRSGFLKTVEELGLGPGRAISFGVPPITMEQGGQAIVSLLERWPDTEVVLCVSDLSAFGAIMECKRRGMRVPEDIAIAGFGDYEISSICHPSITTINVDCYGIGRQAAVRLLDALQAGSEASGDEITLISYKVVLRESTDRSAR
Proteobacteria/Alpha	Rhizobiales	5572	54625	IdnR	pRL100388	Q1M7B8_RHIL3	U		Rhizobium leguminosarum bv. viciae 3841	216596	Idonate utilization	L-idonate	MAEVAKYVGVSAMTVSRAFRQDASVSEETRKRIMEAVDALGYVLDLSAGSLSSRRSGFIAALVPSINNSNFSDTARGMTDALQNTGLQLLLGYTDYSTEKEEELIEAMLRRRPEGIILTGGSHTARARRMLVKAGIPVVETWELPEDPINQVVGFSNSEAMALLVRTLASQGYRKFGYIGGTTARDTRGSQRRSGFQKTVEELGLGPGRMISFGVPPITMEQGGQAIVSLLERWPDTEVVLCVSDLSAFGAIMECTRRGMKVPRDIAIAGFGDYEISSICHPRITTINVDCYGIGRQAAARLMDALHTGEATGDEITLTGYKVVLRESTDRNGAPTA
Proteobacteria/Alpha	Rhizobiales	5572	54626	IdnR	NGR_b22310	C3KMR1_RHISN	U		Rhizobium sp. NGR234	394	Idonate utilization	L-idonate	MHSVDNPGVLGLVTITWMPMHNYRKPPTMADVARRTGVSPMTVSRAFKRDSSVSQETREAVLSAAEELGYVFDSTASNLRSQRTDFIAVTIPSINNANFADTVRALSDRVSERGLQILLGYTNYDVAEEERLIEQLLRRKPEAIVVTGGKHTPRARKLLSNAGIPVIETWDLPEEPIGHVVGFSNALAVREMVDHFVSVGYRKIAFIGGDADRDTRGTDRRAGFIAALKDHGIDAPRLIAAGPPPISMREGANAMGQLLERFPDTEAVICVSDLSAFGALTECQRRGIAVPDRIAIGGFGDYEIGAISVPSLTTINAFASEIGAKTAELILDVLDGKLDQPGRVTIRPDLILRQTSR
Proteobacteria/Alpha	Rhizobiales	5572	54626	IdnR	NGR_b22380	C3KMR8_RHISN	U		Rhizobium sp. NGR234	394	Idonate utilization	L-idonate	MSSRGKVITLQEVADRAGVSRMTVSKVLRGAGNISAETRQRVKQAADELGYLPNNLAGSLSSRKSRMVAVIIPSISDIVFSEVLSGINATLRPRGFQTFIGESGFDPETETELIRAMLSFRPAGILLNGGMARSADAESLLARRTCPAIQLWDCDRRALDFSAGPSHEEAGHLVARHFLERGRRRIAYVGAELDKDLCARRRHLALKSSLAAAGIDLLSVTAEDRPRQAVTGRFLTEQLVRTHPGIEAIHFLNDAMALGGLSYLHDAGFPVPERISVVGFNGTSLANAVRTRLTTIDLPRTEIGEKAAQALLQMIAEESVPDVWRAPLALVQGNTTRPDK
Proteobacteria/Alpha	Rhizobiales	5572	54629	IdnR	Xaut_2434	A7II33_XANP2	U		Xanthobacter autotrophicus Py2	78245	Idonate utilization	L-idonate	MSRPTQKPTMRDVSRLARVSPMTVSRVFTDPDTVAAPTRERVLKAVEQLGYLPDLVAGALSSRRTNFVGLILPTLTNSNFGDTAQGLAEVLKADATQLLIGYTLYQVAEEERLVRALLPRRPDAIVIAGSVHTAATRTLLDRAGIPVVEIWEQPDQPLDRAVGFSNFEVGRAAARHLIALGHRKIGAIGPEADADLCDHRADTRLKGFSSMLREAGLSDALVLRHGLPPASFEHGANAIGALLARAPDVEAVFAVSDLAAFGAMMELKRRGIDVPGQISLIGFGNFEVGRLSYPAMTTIGVDARAIGAAAGTMLRALLKRDAQEAEVERNVDVGFTLIERETTAPRPAAPAKARKRPTAAAAGNQPKTAAGPRRTQAARETP
Actinobacteria	Micrococcineae	5239	51646	IolR	AAur_1987	A1R670_ARTAT	U	*	Arthrobacter aurescens TC1	290340	Inositol utilization	null	MEAGPMSASKPLARRPTIYDVAKLAGVSPSLVSLVLQNPGKVSDKRRDAVRTAITELGYRPSRAATTLASSRTKSIGLVIDDYRNVWFVDLLRGLESVLAEHGYQVTLADSRPGENRIKEAADGLLAMHVDGLVIAAEPGATVLSGTEVPTVVAGWRNGVPDDADLITNDDDGGGAMAAVHLLDLGHRRIGHLSGSGGAAAHRRAGFDARLRQSGVKPLIVGEEGGTTEEDGYASACWLLDHHPDITAIFAANDTMALGAFGAIKARGLVAPSDISVMGYDNSALAKSRYLELTSVDNRSDVVGMGVAQSLLARIQGSTVGAQRKLIQPALVVRRTTAAPRS
Actinobacteria	Micrococcineae	5239	51647	IolR	Achl_0116	B8H8E5_ARTCA	U		Arthrobacter chlorophenolicus A6	452863	Inositol utilization	null	MEWDDCTVKASTDSASARPTIYDVAHRAGVSKSLVSLVLRGSPNVSDPRREAVQAAIDELGYRPSRAASALAANRTQSIGLLIDDFHNPWFVEVLRGLRSVLDPAGWNISVADLQLEALSGRNPLDGFLAMHVDGLIIAAEPHAAPPLRNLDVPFVVAGVRELDSGPADVVASDEVQGAGLAVEHLVQLGHRRIAHLSGTGGSAKARLDGYLRSVRAAGLEPLVVGESGDTTEEAGYTAARELFSGHDGVTAVFAANDTMALGALAALKEHGLRTPEDVSVVGYDNTPLAESRYLDLTSIDSHNASIGSEAARALLGRIAEPSAPRRQLLLAPSLMARGSTAAPPS
Proteobacteria/Gamma	Oceanospirillales/Alteromonadales	5731	56150	IolR	HCH_03302	Q2SH17_HAHCH	U	*	Hahella chejuensis KCTC 2396	349521	Inositol utilization	null	MQDKRITSDDVARLAGVSRSAVSRTFTPGASVSESTRNSVIAAARKLGYRPNALARSLTGQQSGLVAVVMAEFANPYESQVFYALTQALQKLDKVSMLVTPDESGDINNSLQLVGAYQVDSAIIAAGSLSLQATQICLTMGIPSVLMGRDDPFGKICSVQTDNRMAGRLAAEHLVNSGAQRPAYIGGRPDGQASQERKQGFFDSLRDQGVEPLGHCDNPDYSYQSGYQSALELLQRRPEIDSLFCAFGAMDAIRQQLGRKTPQDIQFVGADNVPMAEWPGYQLTTISQPVELLAQAVMENLEIILTQGQAMARSRRVAPWLVSRATTRNA
Proteobacteria/Alpha	Rhizobiales	5545	54265	IolR	mlr1005	Q98LI8_RHILO	U	*	Mesorhizobium loti MAFF303099	266835	Inositol utilization	null	MRRRATAKNVADAAGVSKWTVIRAFTPGASITEESKRRVLQAAAALNYSPNLLARSLATNLTHQVAVFVDDFANPQKLPFLETLTDRLQAEGLVAMLININNHFDHVRALLNADQRQVDAIIMFGTAFRSETLNDRRLGRSMPPMFVLARDSQIYGVPAVVCDAELALKEIVDHLYEKGYRRPGFMAGAPALSTALRRRHHFIDFWKQKGVDETAVISAERYSAQAGAESVRHYLQNTDAKDRVDVLMCENDILAIGALDEIRGQFGLRVPQDMAVIGFDNYELGGASVYGLSTYEQPKDEMVKVVIEMITGRLPPETVTLPGKLIVRNSA
Proteobacteria/Alpha	Rhizobiales	5545	54268	IolR	RHE_CH02362	Q2K7P4_RHIEC	U		Rhizobium etli CFN 42	347834	Inositol utilization	null	MRKRATAKQVAEAAGVSKWTVIRAFTPGASITEESKRKVLETAAALNYTPNLLARSLATNATHQVAVFVDDFANPQKLPFLETLTERLQAAGLVVMLININNHFDHVHALLHADQRQVDAIILFGTAFRNETLTDHQLGRGMPPMFVLARDSQIDGVPAVVCDAERALKDIVDHLHERGYRRPGFMTGATVLSTALRRRQHFAEFWEEKGVRDIAVLSAERYSAQAGAEAVRQYLNSTNATDRVDVLMCENDILAIGAMDEMRGKYGLRVPEDMAIVGFDNYELGGSSAYSLTTYEQPRHQMVELIVGMITGRVDAETVSLPGKLVIRGST
Proteobacteria/Alpha	Rhodobacterales	5546	54275	IolR	Jann_1424	Q28SH1_JANSC	U	*	Jannaschia sp. CCS1	290400	Inositol utilization	null	MAVTLKDVAERAGVSTSAVSRTFTEGASVSPKTRAKVERAADALGYSPNALASSLTTGRTKLIGLVSNNFHNPLFLEVFDRFTRGLQDRGLRPLLVNLSDETDPISSVRMMRQYSVDGAIIASSTLPPSFAEAYRMAGIPVVHSFGRYTTAPQVHVVGIDNVACGRMAGEALISRGYRRVAFLGGPEGATSTQDRALGFLGALHEHPEIEVTVSYAQAYSFDAGRVEMTKLLMSDPAEAYFCGDDVLSVGALSAVQEAGLSVPGDIGIIGLNDMQMAGWQNINLTTIRQPVAEIIGASIDLVIGTVEDPKRHPETRLFPCRVIERGTLRKVP
Proteobacteria/Alpha	Rhodobacterales	5546	54276	IolR	SKA53_08821	A3V7I0_9RHOB	U		Loktanella vestfoldensis SKA53	314232	Inositol utilization	null	MTVTLKDVALRAGVSRSAVSRTFTEGASVSAKTRAKVEKAAIELKYSPNALASSLTTGRTKMIGLVSNNFHNPLFLEVFDLFTRGLQERGLRPLLVNLSAETDPANSVRMLRQYSVDGVIVASSTLPPSFAEAFRDVGIPVVHSFGRYTSSPQVHVVGIDNIACGRMAAQRLIATGSRRVAFLGGPENATSTQDRERGFLEAMASHTDIAVSVSYASAYSFDAGRTEMARLLESSPAEAYFCGDDVLSIGALSAIADAGLRVPDDIGVIGLNDMAMARWENINLTTIRQPIAEIIGASVDLVVGTIDQPERHPETRLFPCRIVERGTLRPFP
Proteobacteria/Alpha	Rhodobacterales	5546	54286	IolR	TM1040_3344	Q1GM00_RUEST	U		Silicibacter TM1040	292414	Inositol utilization	null	MAVTLKEVAERAGVSRSAVSRTFTDGASVSDKMRRKVEKAARELGYSPNALASSLTTGRTKLIGLVSNNFHNPIFLEVFDLFTRGLQDRGLRPLLVNLTDETDPEHSVNMLRQYSVDGVVVASSTLPPGFAKAFRDAGVPVVHSFGRSSSAPQVHVVGIDNVESGRMAARALIARNYTHVAFMGGPETATSTQDRHAGFMSEMSKHPNIRATYSFAEAYSFQAGRSEMMRLLQAGPAEAYFCGDDVLSIGALSAISDSGLSVPKDIGIIGLNDMEMAGWESIDLTTVHQPIRQIVSSSIELMVAMLDEPDRYPEARIFPCSIVERGTLRPAPKT
Actinobacteria	Streptomycetaceae	5450	53343	IolR	SAV_7156	Q826M6_STRAW	U	*	Streptomyces avermitilis MA-4680	227882	Inositol utilization	null	MSEAQSEGRPTIRTVAERAGVSKSLVSLVLRGSEQVRPEKREAVLRAMAELGYRPNAAARSLSEQRTRTVGVLLNDLRNPWFVDLLDGLNSLLHDNGLHMILADGRLNRRIGQDLTRPFLDLQVDGLIAVGTLPDPAALGTAAARIPVVVAGTREPVLPGVDVVANDDEHGARLATEHLIGLGHRAIAHIAGYGAVGDLRRRSFEATMHAHGLADDALVEPSDMTEEGGYRATVRLLSGPRRPTAVFAVNDIASVGALSAADELGLRVPRDLSVVGYDNTSISRLRHLWLTTVDTASHDVGRRAARCLLDRFTDPGRPAGVHLSTPTLEIRRTTAAPS
Actinobacteria	Streptomycetaceae	5450	53346	IolR	SCAB_19101	C9YT18_STRSW	U		Streptomyces scabiei 87.22	680198	Inositol utilization	null	MRPGPANPTIRDVAERAGVSKSLVSLVLRGSEQVREEKRQAVLAAVDELGYRPNAAARSLSERRTRTVGVLLNDMRNPWFVELLDGLNSRLHDNGLRMLLADGHLNRRLGEDLTRTFTELRVDGLIAVGTLPPSEALRTAAGLVPTVVAGAREPTLPRVDVVAGDDQLGARLATEHLIGLGHRRIAHIAGDGVVGALRRRSFETVMREHGLGGLASVERGDLTEEGGYRATVRLLGTAERPTAVVAFNDMACVGALSAAEELGLRVPRDLSLVGYDNTYVARLRHLWLTTVDNASHDVGRAAAQCLLDRIADPTRAGRLVLTTPTLEVRGTTGPPAGH
Firmicutes	Thermoanaerobacterales	5290	52038	IolR	Athe_0343	B9MN23_CALBD	U		Anaerocellum thermophilum DSM 6725	521460	Inositol utilization	null	MPTVKDVAQRAGVSVATVSRVLNNSEKVSEQTRQKVLKAIEELGFKPNLLARNFRKDKSNLILVLLPTIANHYFARVVKGIEDTARKNGYGILLCTTQNSPEIAAEYLKLIERKQVDGAIIASAKVEIDFCKGLDTRRIVQACEFYPFLDTSCVEIDHKKAFYDIVDYLIKKGKRNILCAIGNEDIPSEFERKEGYRKALEENGLQFREENVIRCSYGWTELYEKLKNLCCLKKYDAIACSSDLMAVGAIKAAKALGLKVPDEFSVTGFDNIMMSRLYEPSITTVAQPMYSIGEKAAQILIDALESPGVFEKQKIILSHEIKTRESA
Firmicutes	Thermoanaerobacterales	5290	52037	IolR	Csac_1171	A4XIP1_CALS8	U		Caldicellulosiruptor saccharolyticus DSM 8903	351627	Inositol utilization	null	MPTVKDVAQRAGVSVATVSRVLNNSEKVSEQTRQKVLKAIEELGFKPNLLARNFRKDKSNLILVILPTIANAYFARVVKGIEDTARKNGYGILLCTTQNSPEIAAEYLKLIEKKQVDGAIIASAKIEINFCKDLDTRRIVQACEFYPFLDSSCVLIDHRKAFYDVVDYLIKKGKKNILCAIGNEDIPSEFERKEGYRKALEENGLQFREENVIRCSYGWTELYEKLKNLCCLKKYDAIACSSDLMAVGAIKAAKALGLKVPDEFSVTGFDNIMMSRLYEPSITTVAQPMYSIGEKAAQILIDTLESPGAFKKQKIILPHELKTRESA
Firmicutes	Thermoanaerobacterales	5290	52034	IolR	Teth514_0985	B0K610_THEPX	U		Thermoanaerobacter ethanolicus X514	399726	Inositol utilization	null	MATIRDVAKLAGVSTATVSRVLNEQGGVNSETKQKVLDAIKKLNYKPNTIAKNFRQNKTDTIIVVIPDITNTFFSKILLGMQDVANANGYNVLLCNTNNDVEKELEYIRFTERRGADGIIFLTARVNYTNILELTKTCPVVVACEYIDNLDIPTVSINNFKAAYEASEYLIKLGHKKIAYINGPEGIVLSRDRLRGYKAALERYGIEIDEKLIFEGDFYYESGYKHAKQILENEATAVFTASDDMAAGFIRYCIDNNIKVPEEVSVVGFDNIKLASIIKPELTTIAQPMYEIGTTAMDMLIKLIKGEEVEKRNIVLEHQLIVRESCMPYEKNCVKSKGY
Firmicutes	Thermoanaerobacterales	5290	52033	IolR	Thit_1753	D3T446_THEIA	U		Thermoanaerobacter italicus Ab9	580331	Inositol utilization	null	MANIREVAKRAGVSVATVSRVLNGSDSVSEETKERVLKAIKELNYHPNLLGRNLRRAETRMILALMPNVSNPFYARVVKGIEDVAHKNGYNVMLCNTDSDINREKAYLELLKNRLADGVIFMAPVMSKEELTLIGQNYPVIQCCEYIEGAGVSYVSIDNFSAAYKAVRHLIGLGHKRIGMISCENELVSTKQREAGYRKALEDSGLEFDEKLMKYGDYSFKSGVRAAKQLLAMEERPTAIFAISDIMAIGAIRAIKEEGLKVPEDIAVVGFDDISFASMYDPMLTTISQPKYDLGCVAMELLIKYMSGKLEEPQRIFLEHELIIRESTVK
Firmicutes	Thermoanaerobacterales	5290	52032	IolR	TTE1952	Q8R8P3_THETN	U	*	Thermoanaerobacter tengcongensis MB4	273068	Inositol utilization	null	MANIREVAKRAGVSVATVSRVLNNSDLVSEETRERVLKAIKELNYHPNLLGRNLRRLKTKMVLALMPNVSNPFYARVVKGIEDVAHKNGYNVMLCNTDSDPEREKAYLDLLKNKLADGVILMASVMGKDELTLLAKNYPVVQCCEYIEGAGASYVSIDNFSAAYKAVKHLINLGLRRIALITCKNDFISTRQRETGYRKALEDANIEFDENLIKYGDYSFKSGMRAARQLLSLEEKPTAIFAISDIMAIGAIKALKEEGFKVPEDVAVVGFDDISFASMYDPALTTVSQPKYDLGCIAMEVLLKHIEGELEDPQRIFLEHELVIRESTVKY
Firmicutes	Bacillales	1384	12871	IolR1	BH2219	Q9KAR8_BACHD	U		Bacillus halodurans C-125	272558	Inositol utilization	null	MKPTIYDVAKEAGVSIATVSKVINHTGNMRPATRLKVKQAMERLNYRPNLMATALTGKATKTIGLLVPDISNPFFSEMARTIEDRAHEAGLSVIICSTDENEQKEKKYLELLQQKRVDGFIIASSFHDREGLKRLKEQGTPIVMLTQDDGGLGVPSISVDDYKGGFEATSYLITSGHKRIAVIAEHVSSSRLRIYGYKEAHASHGIPFVEEQIYKTTASTENGKFCLLTMHEKGLLPSAIFACNDLIAIGVIHGAKELGIRIPEDLSVIGFDNTILATTTVPALTTVAQPVADMGRKVVDLLLEAIETKALTNEKVLYTPELIIRGTTKNETIAT
Firmicutes	Bacillales	1384	12872	IolR1	BLi01180	Q65LH6_BACLD	U		Bacillus licheniformis DSM 13	279010	Inositol utilization	null	MKKTIYDVAEAAGVSISTVSRVINNTGRISRSTRQRVHAVMKELDYQPNVHASALTGKRTNIIGLLTPDIANPFFGELAKSVEERAGELGFSIMMCSTDRDPKKETTYFSVLKQKSVDGIIFATGIENQETMDALEDIAKEGIPLVMISQDRALVPMDVVVIDDFMGGYLATRHLISLGHKTIACIAGDGSTTGEKDRLKGFKKAMDEAGIKADETLIAGSGFSLECGKKAAAQIFKSNIPTAVFAMNDVLACGVIQTAREWGLHVPTDLSVIGFDNTFLAEMTDPPLTTVSQPIEEMGRRAAELLAEEISGKKSSKSKIILTPELVVRQSTAPPFKKEAHAEKSGF
Firmicutes	Bacillales	1384	12874	IolR1	BSU10840	DEGA_BACSU	R	*	Bacillus subtilis subsp. subtilis str. 168	224308	Inositol utilization	null	MKTTIYDVAKAAGVSITTVSRVINNTGRISDKTRQKVMNVMNEMAYTPNVHAAALTGKRTNMIALVAPDISNPFYGELAKSIEERADELGFQMLICSTDYDPKKETKYFSVLKQKKVDGIIFATGIESHDSMSALEEIASEQIPIAMISQDKPLLPMDIVVIDDVRGGYEAAKHLLSLGHTNIACIIGDGSTTGEKNRIKGFRQAMEEAGVPIDESLIIQTRFSLESGKEEAGKLLDRNAPTAIFAFNDVLACAAIQAARIRGIKVPDDLSIIGFDNTILAEMAAPPLTTVAQPIKEMGRSVIELLAEAIEGKRKAKQKIVLPPELVVRHSTSPLNT
Firmicutes	Bacillales	1384	12875	IolR1	GK1901	Q5KYQ0_GEOKA	U		Geobacillus kaustophilus HTA426	235909	Inositol utilization	null	MKVTIYDVAKKAGVSISTVSRVLNNTGRISERTRKRVLRVMEELHYQPSMVASALTGKRTRTIGLVIPDVANPFFSEIARKVEDRGREQGFNVLMCNTDNNPETEEMYLSLLRQKSVDGIIIGTTTNNYTMIKELLEENFPLVFIAQDIPELAINVVRVDDFLGGYQAVSHLVSLGHQQIAIMLGNLSRTSDKYRLQAYQQVLQENGLKCEESWIVYTDYSMADGKRAAMELLQSTPRPTAIFACFDSLAVGIYQAAKELGLRIPDDLSVVGFDNTILSAIIDPPLTTVAQPIEEMGRQAVDLLIAQIEETNHTKQRIILPPHLVVRKSACHIAKVKS
Firmicutes	Bacillales	1384	12877	IolR1	Pjdr2_1954	C6CTI2_PAESJ	U		Paenibacillus sp. JDR-2	324057	Inositol utilization	null	MKATIYDVAKEAGVSIATVSNAINGKGNVSKKRREQIFKIMEQMNYQPNVNASALMGKKTYTLGLLIPDISNPFFSEIARAIEDQAHQLGYSVIMCSTDNKDERVERYIALLEQKNVDGILIGTGVDNLDILTNLQARKIPIVMISREASALEVDTVVADDYVGGLMAAQHLAEMGHTRIAILSEQLKVSSARERIRGFKQGLRDRQISFNDRNLVICDYMVEEGRRGAGELLGREDRPTAIFCCNDVLAIGALQEARSLGIKVPEELSIVGFDDTILATVVDPPLTTVAQPIASMAKQAFQLMISNLDEAEPVKKRIVLRPEIHIRQSTAKAKS
Firmicutes	Bacillales	1387	12905	IolR2	BH2313	Q9KAH4_BACHD	U	*	Bacillus halodurans C-125	272558	Inositol utilization	null	MKMSDVAKLANVSPATVSRVLSNPELVSKETRKKVLDVINQVNYKPHIVARQFRTQETKMILVVVPDITSAFFSKVLRGIEHMAIDHGYQVILGDTEHDINRELEYINLLHQKQVDGMVLLTARIDKEKLQDISAHFPMVLACEYMDGLDVPTVSIDNISSARKATEHLIQLGHKRIAHITGPMNIILSRDRLKGYRQAMLGHDIPIDSAYIQEGELTFESGYDQTMKLLALEAPPTAIFAFNDEIAMGAMKAAKDSGLSIPNELAIIGFDNIKMAMMVEPGLTTIDQPKYAIGKKAMELLLKQINNESIKKKKFVLKDELIIRQTCGAEQQTVSHV
Firmicutes	Bacillales	1387	12909	IolR2	GK2115	Q5KY36_GEOKA	U		Geobacillus kaustophilus HTA426	235909	Inositol utilization	null	MASIKDVAKRANVSTATVSRVLRNAGNVTEETRQRVLEAIEALNYQPNVLGRYLRRMETETVLVVVPDITNPFFSKVLRGIEAVALEHGYQVLLGDTQNDVRLEEQYLNLLPQRQVDGMIFLTARIRKELVEEMARQFPIVLACEYLEGADIPTVSIDNISSARKATEHLIRLGHRRIAHLSGPMNIILSRDRLRGYQQALAQHELEADAALVQEGDFTYESGYNLTLKLLALEKPPTAIFAANDEMAIGAIKAVRHRGGRVPDDVAVVGFDDIQMASIFEPSLTTIAQPMFEIGQKAMELLLALIEGTSARRRQLVLPDRLVIRDSCGGERSEQRG
Actinobacteria	Corynebacteriaceae	5241	51668	IolR2	cg0210	Q8NTY1_CORGL	U	*	Corynebacterium glutamicum ATCC 13032	196627	Inositol utilization	null	MSTSRPTIYDVAKAAGVSKSLVSLVLRGSPNVSKESEAAVKTAIKKLNYQPNRAASDLAAKRTQLIAVLIDDYSNPWFIDLIQSLSDVLTPKGYRLSVIDSLTSQAGTDPITSALSMRPDGIIIAQDIPDFTVPDSLPPFVIAGTRITQASTHDSVANDDFRGAEIATKHLIDLGHTHIAHLRVGSGAGLRRFESFEATMRAHGLEPLSNDYLGPAVEHAGYTETLALLKEHPEVTAIFSSNDITAIGALGAARELGLRVPEDLSIIGYDNTPLAQTRLINLTTIDDNSIGVGYNAALLLLSMLDPEAPHPEIMHTLQPSLIERGTCAPRG
Proteobacteria/Alpha	Rhodobacterales	5547	54290	Jann_1107	Jann_1107	Q28TD8_JANSC	U	*	Jannaschia sp. CCS1	290400	Sugar utilization	null	MIDRAPITGKVTSIDVAQRAGVSQSAVSRVFTPGASVSKKMEARVREAADDLGYRPNVLARSLITGRSRIIGLVVAHLDNSFYPDALEKLSAALQAKGYHILVFMAGNSGDDVDSVIHDLMDYQVDGIITASINLSGELTDRCRAAGLPVLLFNRGIEGSGLSSVTSANRIGGAAVANTLLDAGHTKIATISGWMGASTGRDRRDGFVAALEARGAQVHAEADGLYDRDTAARVARDMMQAAHPPDAIFVGNDHMAMAVMDTLRFDLGLSVPDDVSIIGYDDVPMAAWPSYNLTTLRQPVNRMVEATVDTMLDEIETGRAPGTRVEIEGELILRTSARLPKGPTI
Proteobacteria/Alpha	Rhodobacterales	5547	54294	Jann_1107	OG2516_10511	Q2CKA1_9RHOB	U		Oceanicola granulosus HTCC2516	314256	Sugar utilization	null	MTASRITSLDVARLAGVSQSAVSRVFTPGASASDKTTRKVRDAAEALGYRPNILARAIVSGKSRIIGLVVAYLENYFYPEALEKLSNALQREGYHVLVFLTSQKHGEIDDVVGEMLDYQVDGIVFASVGLSSDIAKRCQNAGVPVVLFNRYDDRKDIAAVTSENFEGGRKVAEFLLAGGHDRIAYIAGWKGASTQRDREAGFLAGLTAANRSLHAREVGNFDAEQAKAAARTMFDTPAESRPDALFVANDHMAFVAMDVIRHELGLGIPSDVSVIGFDDVPPAAWLSYNLTTVRQRARRMVEETVKALLAQIECIETTVTRNIAVEAPLIVRGSARIPEGWTDT
Firmicutes	Bacillales	1434	13381	KdgR	BLi03828	Q65E70_BACLD	U		Bacillus licheniformis DSM 13	279010	Galacturonate utilization, Glucuronate utilization	2-keto-3-deoxygluconate	MKDKQTAKVTINEVAAHAGVSKSTVSRYINGKIDAISPKKVKSIKKAIEELNYRPSQMAQGLKVKKSKVIGFLVADITNPFSVATLRGVEEVCDQYGYSIMVCNTDNSPEKEREMLHKLNAHYIEGLIINTTGRNNDVLLDLISQDVSIVLVDRKVPGLKIDAVTTNNREVTSQIVNLMYDKGYAQVGLFTEPIKGISPREERASAYTEIALERNAGGTPLVYEADVKDKESLLQSVKSFLEMKEGKKAILGNNGLLMLKIISCLYELGISIPEDVGIAGFDDTEWYKLIGPGITTIAQPSHEMGRVAMERIIKRIEGDESAPQTIQLEAELVLRQSL
Firmicutes	Bacillales	1434	13382	KdgR	BPUM_3245	A8FI31_BACP2	U		Bacillus pumilus SAFR-032	315750	Galacturonate utilization, Glucuronate utilization	2-keto-3-deoxygluconate	MKEKKQTKVTINEVAAYAGVSKSTVSRYINGRTNEISIEKVKKIKKAIEELHYRPSQLAQGLKVRKSKVIGFIVADITNPFSVATLRGVEEICDEYGYSIMVCNTDNRPEKEREMLLKLNAHYIEGLIINTTGQNNDILQDFQKDGVPIVLVDRKLSELKVDTVTTNNRDITIQLLQQMYEKSYEHIAFFTEPVDGISPREERKEAYEQTAMSKHKKPIIKEIDLKQKEQLREELVHFVQTNQQKKAILAANGLLMLKLISELVELGLKIPEDIGVAGFDDTEWYKLIGPGITTVAQPSHEMGKAAMQKIKTRLEGDESAPQTIQLDGEIIVRKSL
Firmicutes	Bacillales	1434	13383	KdgR	BSU22120	KDGR_BACSU	R	*	Bacillus subtilis subsp. subtilis str. 168	224308	Galacturonate utilization, Glucuronate utilization	2-keto-3-deoxygluconate	MKKKTTGHTTIKDVAECAGVSKSTVSRYINGKIDAISPEKVKNIKKAIAELNYRPSKMAQGLKIKKSKLIGFVVADITNPFSVAAFRGVEEVCDQYGYSIMVCNTDNSPEKEREMLLKLEAHSVEGLILNATGENKDVLRAFAEQQIPTILIDRKLPDLKLDTVTTDNRWITKEILQKVYSKGYTDVALFTEPISSISPRAERAAVYQEMASVQNVNGLVRLHEIDVKDKEQLKAELRSFHKEMPEQKKAILALNGLIMLKIISCMEELGLRIPQDIGIAGFDDTEWYKLIGPGITTIAQPSHDMGRTAMERVLKRIEGDKGAPQTIELEAKVIMRKSL
Bacteroidetes	Bacteroidaceae	4647	45035	KdgR	BACCELL_04099	E2NIG6_9BACE	U		Bacteroides cellulosilyticus DSM 14838	537012	Galacturonate utilization, Glucuronate utilization	2-keto-3-deoxygluconate	MGSERIRIKDIAKMADVSVGTVDRVIHGRSGVSEASRKRVEEILKQLDYQPNMYASALASNKKYTFSCLLPQHEKGEYWTAVEAGIQDALVAYSDFNISVNLSYYDPFDYHSFGDVARNILEQKPDGIMFAPTVPQYTKPFTEELNKRSIPYIYIDSNLKDQPALSFFGQNSHQSGYFAARMMMLLAGGEREIVIFRKINEGIVGSNQQERREIGFREYMLKHHSDCRIWELNLHAKRDSDDAQMLNDFFRKHPNVKNGITFNSKVYIVGEYLLKQQKTDFKLMGYDLLERNVKCLMEGSVSFLIAQQPELQGFDGIKALCDYLIFKKEVPRENFMPIDLLTKENIEFYSNK
Bacteroidetes	Bacteroidaceae	4647	45037	KdgR	BACDOR_02922	B6W044_9BACE	U		Bacteroides dorei DSM 17855	483217	Galacturonate utilization, Glucuronate utilization	2-keto-3-deoxygluconate	MNKLPERIRIKDIARLADVSVGTVDRVLHGRTGVSEASRKRVEEILKQLDYQPNMYASALASNKKYLFVCLLPQHKEGDYWTDVEMGMKRAVETFSDFHITLSVVYYDQYEYSSFINAGEDILRKEPDGVLLAPTIPEMTARFTNKLQEREIPYIFIDSNVDSLNPLAFFGQKSDQSGYFAARMAMMLGECPKEIVIFRQINEGRLGSNQQENREKGFRKYMQEHFPDCKIVELNLYAKRPDEDEALMNRFFQENPQITCGITFNSKVYIVGEYLIGHNMKNFKLIGYDLLRRNVSCLKEGAVDFLIAQQPTAQGYSGVESLCNHLIFKKEVKQCNYMPITLLAVENVDFYLDAHKK
Bacteroidetes	Bacteroidaceae	4647	45038	KdgR	BACEGG_01787	B7AHA4_9BACE	U		Bacteroides eggerthii DSM 20697	483216	Galacturonate utilization, Glucuronate utilization	2-keto-3-deoxygluconate	MKSKQKIRLFFIAFVCGHKDTTIFVITKIVIYLCRKYLDYYCVRTQITMNKPMNTPERIRIKDIAKMADVSVGTVDRVLHGRSGVSEASRKRVEEILEKLNYQPNMYASALASNKKYAFACLLPQHETGEYWTEVENGIHEALTTYSDFNITVRLSYYDPYDYRSFAHAAHDIIEQRPDGVLFAPTVPQYTTPFTNELEALHIPYIYIDSNIKEAPALSFFGQNSHQSGYFAARMLMLLAGDAQEIVIFRKINEGIVGSNQQERREVGFHEYMQKYHPSCRIWGLDLHAKRDGEDEQMLDDFFRSHPSVKNGITFNSKAYIIGEYLLKHQRTDFNLMGYDLLQRNVECLKQGSIFFLIAQQPTLQGFDGIKALCDHLILKKEIARENFMPIDLLTKENI…
Bacteroidetes	Bacteroidaceae	4647	45039	KdgR	BF2720	Q5LBV2_BACFN	U		Bacteroides fragilis NCTC 9343	272559	Galacturonate utilization, Glucuronate utilization	2-keto-3-deoxygluconate	MNKLPERIRIKDIARLANVSVGTVDRVLHGRSGVSEASRKRVEEILKQLDYQPNMYASALASNKKYTFACLLPKHLEGEYWTDVQKGIREAVTTYSDFNISANITHYDPYDYNSFVATSQAVIEEQPDGVMFAPTVPQYTKGFTDALNELGIPYIYIDSQIKDAPPLAFFGQNSHQSGYFAARMLMLLAVNDREIVIFRKIHEGVIGSNQQESREIGFRQYMQEHHPACNILELNLHADLNIEDSRMLDDFFREHPDVKHGITFNSKVYIIGEYLQQRRKSDFSLIGYDLLERNVTCLKEGTVSFLIAQQPELQGFNSIKTLCDHLIFRKEVACTNYMPIDLLTKENIDYYHSK
Bacteroidetes	Bacteroidaceae	4647	45040	KdgR	BACOVA_03831	A7M150_BACO1	U		Bacteroides ovatus ATCC 8483	411476	Galacturonate utilization, Glucuronate utilization	2-keto-3-deoxygluconate	MNKLPERIRIKDIARLADVSVGTVDRVIHGRSGVSEASKKRVEEILKQLDYQPNMYASALASNKKYTFICLLPEHLEGEYWTAVETGIHEAIATYSDFNTSVKINYYDPYDYHSFVNASEAILALQPDGVMVAPTAPQYTKGFTDQLQALDIPYIYIDSNIKEVPPLAFFGQNSRQSGYFAARMMMLLAREEKEIVIFRKIHEGIVGSNQQENREIGFRQYMKEHHPSCTILELDLHAERNDEDNEMLDEFFRTYPMVKNGITFNSKAYIVGEYLQSRGKKDFNLIGYDLLERNVTCLKEGSISFLIAQQPELQGANGIKALCDHLIFKKEVTRINYMPIDLLTVETIDYYHSK
Bacteroidetes	Bacteroidaceae	4647	45041	KdgR	BACPLE_00833	B5CVU6_BACPM	U		Bacteroides plebeius DSM 17135	484018	Galacturonate utilization, Glucuronate utilization	2-keto-3-deoxygluconate	MEKQQDRIRIKDIAQMAGVSVGTVDRVLHSRSGVSESSRIKVEEILKKLNYQPNMYASALASNKKYRFAYLLPSHNEGDYWKDVERGMQQAITRFSDFNVSLSDYYYDQYESGAFIESGMRILDAQPDGVILSPTVEKETEQFVNLLREAGIPYVFIDSNIARLEPLAFYGQHAQRSGYFAARMLRLLAKGEPEIVIFRQINEGRLGSNQQLHREEGFYEYMKEHCPELKMWELNLYAKQPGEDASLLDDFFAAHPNVKCGITFNSKAYIIGEYMQRHGRTDFHLMGYDLLRRNVACLKAGSIDFVIAQQPTVQGYNSIECLCNHLILRKKVKDCNYMPINLITTENIDFYFDAHVNE
Bacteroidetes	Bacteroidaceae	4647	45042	KdgR	BACSTE_00506	B0NM44_BACSE	U		Bacteroides stercoris ATCC 43183	449673	Galacturonate utilization, Glucuronate utilization	2-keto-3-deoxygluconate	MQSKLKDSSFFIAFVCGHKYTTIFVITKIVIYLYRKYLDYYCARAQKAMSKTMNTPERIRIKDIAKMADVSVGTVDRVIHGRSGVSEASRKRVEEILEKLNYQPNMYASALASNKKYAFACLLPQHETGEYWTEVESGIHEALTTYSDFNITVKLRYYDPYDYRSFAREARSIVEMTPDGVLFAPTAPQYTTPFTDELEKLDIPYIYIDSNIKEAPALSFFGQNSHQSGYFAARMLMLLAGEDAQEIVIFRKINEGIVGSNQQERREIGFREYMREHHPGCRIWELDLHAKRDGEDAQMLDDFFRAHPTVKNGITFNSKAYIIGEYLQRHRKTDFNLMGYDLLKRNVDCLKEGSIFFLIAQQPTLQGFDGIKALCDHLILKKEIARENFMPIDLLTKEN…
Bacteroidetes	Bacteroidaceae	4647	45043	KdgR	BT0487	Q8AAH8_BACTN	U	*	Bacteroides thetaiotaomicron VPI-5482	226186	Galacturonate utilization, Glucuronate utilization	2-keto-3-deoxygluconate	MNKLPERIRIKDIARLADVSVGTVDRVIHGRSGVSEASKKRVEEILKQLDYQPNMYASALASNKKYTFICLLPQHLEGEYWTAVELGIHEAIATYSDFNTSVKINYYDPYDYHSFVDASEAILTQQPDGVMVAPTAPQYTKGFTDQLQTLDIPYIYIDSNIKDVPPLAFFGQNSRQSGYFAARMLMLLARDEKEIVIFRKIHEGIVGSNQQENREIGFRQYMEEHHPSCTILELDLHAERNDEDNEMLDEFFRSHPNVKNGITFNSKVYIIGEYLQSRGKKNFNLIGYDLLERNVTCLKEGSVSFLIAQQPELQGLNGIKALCDHLIFKKDVTCINYMPIDLLTVETIDYYHSK
Bacteroidetes	Bacteroidaceae	4647	45044	KdgR	BACUNI_01826	A7V2N4_BACUN	U		Bacteroides uniformis ATCC 8492	411479	Galacturonate utilization, Glucuronate utilization	2-keto-3-deoxygluconate	MERVRIKDIAKMADVSVGTVDRVIHGRSGVSESSRKRVEEILKQLDYQPNMYASALASNKKYAFACLLPLHEKGEYWTDVETGIHNAVETYSDFNVAVHLSYYDPYDYHSFAEASGQILALEPDGVMFAPTVPQYTKPFTDELTQHNIPYIYIDSNIKEEPALSFYGQNSHQSGYFAARMLMLLAGEDAQEIVIFRKINEGIVGSNQQERREIGFREYMQEHHPACRIWELDLHAKRDSEDTLMLDEFFQEHPTVKNGITFNSKAYIIGEYLLKKEKKGFNLMGYDLLQRNVDCLKQGSIFFLIAQQPTLQGFDGIKALCEYLILKKEITRENFMPIDLLTKENIEFYYNK
Bacteroidetes	Bacteroidaceae	4647	45045	KdgR	BVU_3054	A6L4S7_BACV8	U		Bacteroides vulgatus ATCC 8482	435590	Galacturonate utilization, Glucuronate utilization	2-keto-3-deoxygluconate	MNKLPERIRIKDIARLADVSVGTVDRVLHGRTGVSEASRKRVEEILKQLDYQPNMYASALASNKKYLFVCLLPQHKEGDYWTDVELGMKRAVETFSDFHITLSVMYYDQYEYSSFINAGEEILKQEPDGVLLAPTIPEMTARFTDKLQEREIPYIFIDSNVASLNPLAFFGQKSDQSGYFAARMAMMLGECPKEIVIFRQINEGRLGSNQQENREKGFRKYMQEHFPDCKIVELNLYAKRPDEDEALMNRFFQENPQVTCGITFNSKVYIIGEYLIGHNMKNFKLIGYDLLHRNVSCLKEGAVDFLIAQQPTAQGYSGVESLCNHLIFKKEVKQCNYMPIILLSVENVDFYLDAHKK
Proteobacteria/Alpha	Rhizobiales	5548	54305	KglR	AZC_4404	A8HW89_AZOC5	U		Azorhizobium caulinodans ORS 571	438753	Sugar utilization	null	MPVFRPSWPGENAKVKTRKGPAPDASRPSAAGAGHTGSGAPARVTLNDIAAHAGVSRATVSLVLRKSPLVADDTRAKVDAAMVELGYIYNRRAANLRSGASRTIGLVLCEIITPNYAQFTSGIDEVLDGEGYAAFITNSEEDATRQRRLLVRMQEHGVDGIVLVPAEHTRPDALTEAHCTSVPCVVAQRRIEGFPTDYVGPDYAAGMEMVTEHLIALGHTHIGFIGGLRRISPLAERLTGFRRALRRHKLKSGPVVPCPVLDRADGYAAARSLLAAGDHPTALVCYNDVVAFGVMLALTEHGLTPGRDVAVVGCDDVAEAGLHRPALTTFTTDPRVVGREAARLLLRRIENPQLPPEQIIIPPRLVIRQSCGAAFGAPARTAGAGKPPARRATARPA
Proteobacteria/Alpha	Rhizobiales	5548	54317	KglR	SMa0078	Q931A6_RHIME	U	*	Sinorhizobium meliloti 1021	266834	Sugar utilization	null	MSSQERKKSRVTLLDVARHASVSRATASLVLRKSPLVGSETRARVEQAMRDLGYVYNIGAARLRVERSQIIGAIVPNLTNPFFAELLSGIEEAIGATGKVVILANSGERVERQSMLLQRMREHGVDGVVLCPAAGTEPDLSEQLAAWGMPVVQVLRHISVDMDYVGVDYAGGMRQAVDYLASLGHEKIAFAVHGPFHSAYRERVDGFRDAMLAKAFDPEILIHLPAQLGEIADSTHLLFAKATQPTAVICFNHLVALGLAAGLHDCGLTIGRDLSLIGFDDVADAEAIRPRLTSVSTGPTAIGEMAARLLVERIANPDLPPRRVVNDTTLSVRQSCGRPA
Proteobacteria/Alpha	Rhodobacterales	5549	54325	KglR	Pden_5078	A1BC94_PARDP	U	*	Paracoccus denitrificans PD1222	318586	Sugar utilization	null	MQRKRVTLDEVARIAGVSRATVSLVVRKSPLVADHTREKVEQVMADLDYVRDIGAARLRNNSSRTVGVIVPNLVNSFFTEFLAGVERVMGEDDRVVLLANSQDDPRRQEEILQRFRGHGVDGVILCPAAGTDPDLPARMRRWGLPVVQSLREIGRDATDYAGADYIEGVRLAVQHLVGLGRRRIAFLSVSARTSAREERLAGFARALAETGATDAGIVEADLTWEGAAHSAAEVLALRSRPEAVLCFNDVLAAGLMLGLRRAGLEPGRDMGVVGLDDLPLAELTYPPLTSVAMDPAGIGVAAARLLARRLADAGAPVERSILAPRLVVRESSGSDAG
Firmicutes	Bacillales	5274	51909	KojR	Aflv_2026	B7GLF3_ANOFW	U		Anoxybacillus flavithermus WK1	491915	Kojibiose utilization	Kojibiose	MEEVKVTTIKDIAKAAGVSVTTVSRALNGYSDVSEKTRRKIMDIAKQLNYSPNTLARSLVMNKSKTIGLLVSGMTRSAVKDNFTFEVMTGVNDYIAKTDYDVILFNTNSTKQREKTYSQLCRERRVDGVILQGIKTDDPYLTEVVESDIPCVLIDIPIQSDRVGYVTTDNVHGAKKAVQHLLELGHRHIAMMNGHDYAFVSKQRLQGFYEAMEEANVPVQKEWIVNGDFSEEIAEARAYELFAKHQHITAIFCASDLMALGVMKALKQLGLRVPEDVSVVGYDDILLASYVSPALTTVAQNKFQMGYEAASMLIDMLEGNEAKVVTLRTQLVERESTAPVKKG
Firmicutes	Bacillales	5274	51913	KojR	BH3692	Q9K6N6_BACHD	U	*	Bacillus halodurans C-125	272558	Kojibiose utilization	Kojibiose	MTTIKDIAKVAGVSVTTVSRALNGYSDVNEKTRKKIKDIANELKYSPNVMARSLVMNRSKTIGLLVSEISREGAKDNFTFEVLCGINDRASESDYDIILFNTNTSKQKLKSYTQLCRERCVDGVILQGIKKEDPYLEEVIESDIPCVMVDIPITGESVSYVTTDNVDGAKKAVETLIDFGHRKIAMMNGHERAYVSGKRKLGYEQALQEAGIPLQEEWVLNGEFSEQVAEKEAYQFLQKHSDVTAFFCASDLMALGVMKAAKLLNLRLPEQLSVIGFDDILLAQYTSPPLTTVAQNKYQMGYAAAGLLIDRLRMKEVPPFHMLDNELIIRESVAKAP
Chloroflexi	Chloroflexi	5461	53432	KojR	Cagg_2268	B8GD81_CHLAD	U	*	Chloroflexus aggregans DSM 9485	326427	Kojibiose utilization	Kojibiose	MTATKVTLKDVAARAGVSYQTVSKVLNGEMQVAPETMERIQAAVQELGYRPNRIARNMRAGRSFMIGYSWTQTEPGQVNHILDQFLSSMVREAGAVNYFVLPFPFSEDRSQIDIYRDLIRSGNVDGFVLSSINYNDPRVQFLLKQKFPFVAFGRSNPDWDFAWVDIDGTAGTRQAVEYLIGRGHRRIAILAWPEDSRVGNDRLQGYLEAMQTAQLPIETGYILRGEGTFEVGRAMTLHLLDLSPERRPTAIMTLNDTMAIGAMAAARERGLTIGTDLAIIGFDDAPMVQYLFPPLSSVRQPIAEAGRKCIELLVAIVEGREPEQKHILLQPSLIIRASS
Chloroflexi	Chloroflexi	5461	53433	KojR	Chy400_2182	B9LGY0_CHLSY	U		Chloroflexus sp. Y-400-fl	480224	Kojibiose utilization	Kojibiose	MPMTASKVTLKDVAARAGVSYQTVSKVLNGDMQVAPETMERIQAAVQELGYRPNRIARNMRAGRSFMIGYSWTQTEPGQVNHILDQFLSSMVREASAVGYYVLPFPFSEGKSQIDSYRDLIRSGNVDGFVLSSVNYHDPRIQYLLKQKFPFVAFGRSNPEWDFAWVDIDGAAGTRQAIEYLIGRGHRRIAILAWPEESRVGNDRLQGYLDAMRAAEIDIEPGYLLRGEGTFEVGRAMTLHLLELPPERRPTAIMALNDTMAIGAMAAARECGLEIGTDLAIIGFDDAPMVQYLFPPLTSVRQPIAEAGHKCVELLVSLVEGRPIEQHHILLSPSLIIRASA
Firmicutes	Thermoanaerobacterales	5273	51902	KojR	Athe_0402	B9MN80_CALBD	U		Anaerocellum thermophilum DSM 6725	521460	Kojibiose utilization	Kojibiose	MRKNKNVTIKDIAKALGLSPSTVSRALNNYSDISPETRDKVIEMAKKLNYTPNIFAKSLVTNKTKRVGLFIEDMEREGIYGVFYYEILISFRKAAMDNGYEVVLLSTSSEEQKRISFDAVMQEKGLEGAFIMGLKMDDEYLNEIQKSTYPVVLLDIPIKNSNVGYVTTNNLKGAQLATEHLINLGHKKIGFLNGHKKAYVSQERLNGYILALSKNGLQVDSELIYEGDFTEASGFKAADYFVQKGVTAVFAASDMMAIGLIKRLKELGVDVPKKVSVVGFDDISLARYITPTLTTIRQNKSEMGKSAFYLLLNLISKQPINHIILEPELVKRESTARLR
Firmicutes	Thermoanaerobacterales	5273	51903	KojR	Csac_0443	A4XGP6_CALS8	U		Caldicellulosiruptor saccharolyticus DSM 8903	351627	Kojibiose utilization	Kojibiose	MRKSKNVTIKDIAKALGISPSTVSRALNNYSDISPETRDKVIEMAKKLNYVPNIFAKGLVTNKTKRVGLFIEDLEREGIYGVFYYEILTSFRKAAMDNGYEVVLLSTTSEEQKKVHFDTVMQEKQLEGAFVMGLKTDDEYLNEIQKSTYPVVLLDIPIKNSNIGYVTTNNLKGAQIATEHLIHLGHRRIGFLNGHKKAYVSQERLNGYILALSKNGISIDNELIVEGDFTEESGYKTADYFLEKGVTAIFAASDMMAIGLIKRFKDLGVEVPAKVSIVGFDDISIARYITPTLTTIRQNKSEMGKSAFYLLLNLISKQPINHIILEPELVKRESTARLR
Firmicutes	Thermoanaerobacterales	5273	51906	KojR	Teth514_2203	B0K4K2_THEPX	U		Thermoanaerobacter ethanolicus X514	399726	Kojibiose utilization	Kojibiose	MAVTIKDIAKYAGVSVTTVSRALNGYPDVSEETRERIKKIAEQLNYTPNSIARGLVTNKTHTVGLIVSELIKPGAYHPFFLEVLAGIKAGLKKDKYDLILFTVDPESQDATSYEKLCNDRKVEGAIVEGLRLSDPYIEEIKRTQIPTVLIDIPILTDKVGYVSSDNVQAAFEATSYLIKLGHRNIGFINGHNDAAVSFERLEGYKKALEKNNIPYKEEYVVFDDFTQEGGYNSFKTLVFEHPEITAVFHASDLMAIGSFKAAKDLGMKVPDDISIVGFDDIELASLITPGLTTIRQDTFKMGYNAAKHLLSIIKGEKPQHILIPHKLVIRDSARKI
Firmicutes	Thermoanaerobacterales	5273	51907	KojR	Thit_0753	D3T7V3_THEIA	U		Thermoanaerobacter italicus Ab9	580331	Kojibiose utilization	Kojibiose	MAVTIRDIAKYAGVSVTTVSRALNGYPDVSEETRERIKKIAEKLNYTPNSIARGLVTNKTHTVGLVVSELIKPGAYHPFFLEVLAGIKAGLRKDKYDLILFTVDPESQDTTSYEKLCNDRKVEGAIVEGLKLSDPYIEEIKKTQIPTVLIDIPILTDKVGYVSSDNVQAAFEATSYLIKLGHRNIGFINGHKDAAVSFERLEGYKKALEKNNIPYKEEYVVFDDFTQEGGYNSFKTLIFENPEITAIFHASDLMAIGSFKAAKDLGMKVPDDISIVGFDDIELASLITPGLTTIRQDTFKMGYNAAKHLLSIIKGEKPQHILIPHKLVIRDSARKI
Firmicutes	Thermoanaerobacterales	5273	51908	KojR	TTE0797	Q8RBL9_THETN	U	*	Thermoanaerobacter tengcongensis MB4	273068	Kojibiose utilization	Kojibiose	MAVTIKDIAKYAGVSVTTVSRALNGYPDVSEETRAKIKKIAEELNYTPNSIARGLVTNKTQTIGMVVSELIKPGVYHPFFLEVLAGIKAGLKKDRYDLILFTVDPESQDATSYEKLCNDRKVEGAIVEGLRLSDPYIEEIKGTQIPTVLIDIPILTDKVGYVSSDNVQAAFEATSYLIKLGHKNIGFINGHKDAAVSFERLEGYKKALEKNDIPYREEYVIFADFTQEGGYNAFKTLIFEHPEITAIFHASDLMAMGSYRAAKDLGMRIPEDISLVGFDDIELASLITPALTTIRQDTFKMGYTAAKHLLAIIRGEKPQHIVIPHKLVVRDSARKL
Proteobacteria/Gamma	Enterobacteriales	1152	10535	LacI	CKO_02824	A8AKB7_CITK8	U		Citrobacter koseri ATCC BAA-895	290338	Lactose utilization	Allolactose	MNVKPVTLYDVADRAGVSYQTVSRVVNQASHVSAKTREKVEAAMAELNYIPNRVAQQLAGKQTPLIGVATANLALHAPSQIVAAIKSRADRSGASVVIAMVERNGVDACKAAVHNLLAQRVSGLIINYPLDENDAIAVAAVCGNVPVLFLDVSDRFPVNSIIFSHDDGARLGVEHLVEHGHQRIALLTGPRSSVSARLRLAGWHKYLTHYQLRPVAETEGDWSAMSGFQQTMQMLNDGTMPTAILVANDQMALGAMRAIAEFGLRIPQDISVIGYDDTEDSACYIPPLTTIRQNFPLLGATSVDKLLQLSRGEPATGNQQLPVSLVQRKTVQPPNAQATSPQALADSLIQLARQVSLLAPKM
Proteobacteria/Gamma	Enterobacteriales	1152	10536	LacI	Ent638_0927	A4W7D1_ENT38	U		Enterobacter sp. 638	399742	Lactose utilization	Allolactose	MKAITLYDVARLAGVSYQTVSRVINDAEHVSSRTREKVQQAMAELHYVPNRGAQQLAGKRTRTLGLITTDLALHAPSQIASAVKSRAGERGASVMISMVEQPEFCQAALQELLAQRVEGLLVNVPLDDAEAEKIRHLAAPVPVLFFDVSPSANVHRLAFDAEQGATLGAEHLLSLGHQHIALLAGPESSVSSRARLSGWQARLGQANVTPCAIAHGDWSAASGYEKGHQLLSGATLPDAILVANDQMALGVMRACSEKGIAVPGQISVVGFDDTADSAWFSPPLTTIRQAFRDAGERSVEWLLSSATNELWQTQLPVTLVARHSSARFSPQQADREALAQQLKSLAIMAEQLARQ
Proteobacteria/Gamma	Enterobacteriales	1152	10540	LacI	ECA1491	Q6D735_PECAS	U		Erwinia carotovora subsp. atroseptica SCRI1043	218491	Lactose utilization	Allolactose	MKQKPITLHDVAEYAGVSYQTVSRVLNQAPHVSSRTRNKVEQAMAALNYTPNRVAQQLAGKTITTLGLVTTDLSLHAPSQIAAAIKSTASQLGINIVMSMLSSPDVNTCNNAVNDLLSQRVSGVIVNVPLSTDEVAHISQTCADTPVLFMDADPHTDILNVMFDPDHGARLAIAHLVELGHQHIALLTGPMTSISARLRYEGWLAELEKQRLSPVSVLHGDWSAASGYHQTLALLGQSLRISAIVVANDQMALGVLRALHEYGLRVPEQMSVIGFDDTQDSAYYTPPLTTIRQDFRLLGKEGVTRLLATLRDPTQATSLLLPTELIVRHSTAIHSSTHASLQELTKNLLDITRQLQRL
Proteobacteria/Gamma	Enterobacteriales	1152	10533	LacI	b0345	LACI_ECOLI	R	*	Escherichia coli str. K-12 substr. MG1655	511145	Lactose utilization	Allolactose	MKPVTLYDVAEYAGVSYQTVSRVVNQASHVSAKTREKVEAAMAELNYIPNRVAQQLAGKQSLLIGVATSSLALHAPSQIVAAIKSRADQLGASVVVSMVERSGVEACKAAVHNLLAQRVSGLIINYPLDDQDAIAVEAACTNVPALFLDVSDQTPINSIIFSHEDGTRLGVEHLVALGHQQIALLAGPLSSVSARLRLAGWHKYLTRNQIQPIAEREGDWSAMSGFQQTMQMLNEGIVPTAMLVANDQMALGAMRAITESGLRVGADISVVGYDDTEDSSCYIPPLTTIKQDFRLLGQTSVDRLLQLSQGQAVKGNQLLPVSLVKRKTTLAPNTQTASPRALADSLMQLARQVSRLESGQ
Proteobacteria/Gamma	Enterobacteriales	1152	10537	LacI	KPN_pKPN3p05872	A6TI30_KLEP7	U		Klebsiella pneumoniae subsp. pneumoniae MGH 78578	272620	Lactose utilization	Allolactose	MAQNISWYGMIAPEESQFRVVNVKPVTLYDVAEYAGVSYQTVSRVVNQASHVSAKTREKVEAAMAQLNYIPNRVAQQLAGKQSLLIGVATSSLALHAPSQIVAAIKSRADQLGASVVVSMVERSSVEACKAAVHNLLAQRVSGLIINYPLDDEDAIAVEAACANVPALFLDVSDQTPINSIIFSHEDGTRLGVEHLIALGHQQIALLAGPLSSVSARLRLADWHKYLTRNQIHPIAEREGDWSAMSGFQQTMQMLNEGIVPTAMLVANDQMALGAMRAITESGLRVGADISVVGYDDTEDSSCYIPPLTTIKQDFRLLGKTSVDRLLKLSQGQAVKSNQLLPVSLVKRKTTLPPNTQTTSPRTLADSLMQLARQVSRLESGQ
Firmicutes	Lactobacillaceae	4596	44359	LacR	LBA1465	Q5FJ38_LACAC	U		Lactobacillus acidophilus NCFM	272621	Lactose utilization	Lactose	MTTIKEIAQKSGYSPATVSRLLNNDPNLSITADTKNKILEIANKLGYWKDHQEKEIKPTIALLYRTNHKEQLQDEYFTSLKQALVETVKQKSMKMKTFYNVKDLIENASLFQGFIGVGAAPIENAELLELHKVLPNGVFVDTNPAPELFDSIRPNLSLTVKNAIDLFIKNDCKTIGFIGGVGPKHDHIQENDPRAVAFAEYMKVRNKDTNYMFVSGPFSVENGYELGKEVVKECEDNLPDAFLIASDTLSVGVLQAFNEENVNVPKDTAILSINNSNVVKYVSPPLSSYNINQQEMIDLALTMLTNLIIQPDRAHIDVNMNTDLVVRKSFVPKGE
Firmicutes	Lactobacillaceae	4596	44363	LacR	LAF_0781	B2GBT5_LACF3	U		Lactobacillus fermentum IFO 3956	334390	Lactose utilization	Lactose	MVTIKEIAARTGFSTATVSRLLNDDPTFSVSSQTKKKILGVAKSLGYQHQRKGNSTNHNISLLYSISPQKELSDIFYNDLRNSIIEFAAEIGMTLSFVRHANEIPENSDGFIAVGYYDQQEIEQLKQLSIHGVFLEYNPSYHDFDSIKFNFQQIVKEAIVLFINNHFHSIGFIGGPSWSSNLKPHNHDDVRTQYFEYYTKRAGVFDDQAIFIGDSFSVSSGFTLGKQIIKQYSGKPLPEGFLVATDPLAVGVLQAFNESRIVVPDDTTLISINDNDIAKYVSPPLTSFHLDVNQLGSSSVNFLQQVIDTPNRQSTTILLGAELVYRKSFPEPS
Firmicutes	Lactobacillaceae	4596	44364	LacR	lhv_1547	A8YW97_LACH4	U		Lactobacillus helveticus DPC 4571	405566	Lactose utilization	Lactose	MRTIKEIALKSGYSPATVSRLLNNDPNLSITADTKNKILEIANKLGYWEDHQEKKIKPTIALLYRVNHKEQLQDEYFTSLKQALVSTVERDALKMKTFYDIEDLIKNASLFQGFIGVGAEPIENAQLVKLHKVLPNGVFVDTNPAPELFDSIRPNLPFTVKNAIDLFIKNGINKIGFIGGVGPKHDHIQENDLRSITFVEYMKTRGMDTKWTCVEGPVSVENGYKLGKMVLAKYKNDLPEAFLIASDTLAVGVLQAFNEKNVNVPKDTKILSINNSNVVKYVSPPLSSFNINQQEMIDMALDTLTHLIIRPDRPKIDIRMNTNLVVRKSFVPQEK
Firmicutes	Lactobacillaceae	4596	44365	LacR	LJ0856	Q74K97_LACJO	U		Lactobacillus johnsonii NCC 533	257314	Lactose utilization	Lactose	MTTIKKIAEESGYSPATVSRLLNNDPNLSITADTKNKILEIANKLGYWKDHQEKKIRPTIALLYRVNHEEQLQDEYFTSLKNALISTVEKEALQMKTFYEIDDLIKNASLFQGFIGIGAAPIENKKLKQLHKILPNGVFVDTNPAPELFDSIRPNLELTVKNAIDLFFKKGYEKIGFIGGVGPKHDGIQEIDRRASAFAEYLKARGKNNNYMFVEGPFSVENGYQLGKKVTAKCKNKFPQAFLIASDTLAVGVLQAFNEEGINIPKETAILSINNSNVVKYVSPPLSSYNIDQQEMIDMALSMLINLIIKPDRAHIDVNMNTKLVIRKSFIPKEDK
Firmicutes	Lactobacillaceae	4596	44366	LacR	lp_3470	F9UUD7_LACPL	U	*	Lactobacillus plantarum WCFS1	220668	Lactose utilization	Lactose	MPTIREIAAKAGYSPATVSRLLNNDPSFSISDHARKKILQTAQNLNYEQPNTTHGLAYQIATIFAVQPKQELEDIYFSNLRQSLVEHGKQANLKLTFYPDIDHIPHDIDGVMAVGEFDSDALHKLRQLTPHRIFVDSNPDPHHFNSVQPNLQAITEQAIDQLIAAGDTPIGLINGGYWNKDQQVTHQQDPRQKYFESRLRELQLFDSRFLFIGGEFSVASGYRLGQQVVQSLSKQALPKGFLVGSDPLAVGVLQAFNENKITVPTDTAIISINDIDIARYVSPPLTTFHIDTDDLAAQAITTLKDTIIFDRSQKRMVLVDTKLIYRKSFVKPTNKS
Firmicutes	Lactobacillaceae	4596	44367	LacR	LAR_1034	B2G7W8_LACRJ	U		Lactobacillus reuteri JCM 1112	557433	Lactose utilization	Lactose	MATIKEIAEKSGYSPATVSRLLNNDQNLSISPSTRNKIMTVANELGYWNNHKKNSQQQPIRPNLALLYRVSGKEQLQDEYFTFLRNAIIKEVDEAGAQVEIFSNIKDLIAAADSFQGFIGVGADRVTQDQLIELHQYLPHGVFVDINPMPQLFDSVQPNLELTIQDALHRLTKAGYERIGFIGGKGLNLNNIQQADAREIAFREFTGMQGIKEAPLYVDGPFNVKNGYQLGKRVLEQSGDNLPEAFIIASDTLSVGVLQAFNEAGVIVPRDTVVISINNSDVAKYVSPPLTSYNINQETLSRMAINLLQDLITHPQRPHVHLTVNTNIVFRKSFPKENK
Firmicutes	Lactobacillaceae	4596	44371	LacR	LEUM_1063	Q03XA9_LEUMM	U		Leuconostoc mesenteroides subsp. mesenteroides ATCC 8293	203120	Lactose utilization	Lactose	MTTIKEIALKTGYSSATVSRILNNDQTFSVTDSTRETVQTVARQLEYISVGSNQFLDINLAVIFSINPDEELEDVYYVKMREIIEATAKKSGLKIIFYKNVMELSENVRGVLLIGKFNQDALNEIIKKEIICVFVDSNPNPGIFTSVQPNLEFTITRALNEFRSRNFTKVGFIGGKLWNKGDNAFQFDDLRRRYFESYAKEISIYSKEFVFIGSDFSTSSGYRIGKKILNAYSENELPQAFLIGSDSLAIGVLRAFNEENISVPYTTAFISINDIEVAKFSSPSLTTFKINIDDMINEALNLLHQRIINPKTTSPEVVLKSPELIYRETFPRKIDNR
Firmicutes	Streptococcaceae	4630	44815	LACR_0766	LACR_0766	Q030P8_LACLS	U	*	Lactococcus lactis subsp. cremoris SK11	272622	Sugar utilization	null	MLETKTMTKITLKEIAIMADVSVMTVSNVIRGKDSRVSAETKAKIQALVKKYNYVPNQNAANLRSGKSKLIGVLFYNKSQNIDFTDPFISSVLTGIERRAKEEGYFTMVHTVQNAKGIEQLQRNWSFAGFIVVGVSNKDFLQIDQAILTPVSYIDTYFEDTKKLDDKLRNFIGTNEEKISESIANHLTEMGHEEVLFYSFDFNQEEPSVIEKRYHAFHKFFKGEILFATTKSADYQEILKSVSVYLMEQPFTAIYATADILAAKLNQIFKEISIVGVDDAEFDEFISPKLTTVAINQVEKGNVAMGSLINSIEKEISENYSSESLLIIRDSVKKL
Firmicutes	Streptococcaceae	4630	44818	LACR_0766	SDEG_1904	C5WJ21_STRDG	U		Streptococcus dysgalactiae subsp. equisimilis GGS_124	486410	Sugar utilization	null	MATIKEIAAELGISPMTVSNVLNNKKHKVSEKTYQRVMALVQKRGYIPDANARTLSSGSSRIIALWLPSFEQKSLLEIPYLSTITATISRFANQNHYEIMLLSTPSVQEFCHAVKSWGIDGAVAFGVSSENAQLITQVLTIPTIFIDSYVEDPGICTINSDDFSGAYLATKHLCECGHTAIAFASGKEVYQEDRFRQNGLLYQRFLGYQKAIQEYNLDSHLLGEEISFEGGVLLGKAIAQHNPKQVTAIFSTADEMIVGIKEGLESSGQKVPTDFSLIGFDNLPFTSYTSPKLSTVHQETTQKAQLAIDSLLALMSGKPIQNKQVLPIQLLKRESVLDRRKQS
Firmicutes	Lactobacillaceae	4616	44633	LBA1472	LBA1472	Q5FJ32_LACAC	U	*	Lactobacillus acidophilus NCFM	272621	Sugar utilization	null	MTTIRDIAKLSGVSVATVSRIINHSGKVSETTKQKVEKIISQTHYQPNQVARTLYQKKSKMIGIIIPDLNNRFYAQIIDGIQEVIQKEGYTALISFSTNSDVKKYQNAIINFENNNVDGIITSAFTIPPNFHLNTPLVMYDSANINDDIVRIVSNNTKGGKESIKLLSKKIEKVLIQHWPLSLPTIRERIEAMTAEASKLKIDYLLEETPENNPYISAQSALNKSNQFDAIITVNDLYAAEIIKEAKRRNLKIPDDFQLVGYDNNILCGYTSPTISTIDQNPKLIGQTAAHRLLDLMSGNNSTRNSIIDVLPIKRDSTL
Firmicutes	Lactobacillaceae	4616	44639	LBA1472	LJ1260	Q74J50_LACJO	U		Lactobacillus johnsonii NCC 533	257314	Sugar utilization	null	MTIRDIAKLANVSVATVSRIINNSGKVSDKTRLKVNKIIEETNYHPNQVARTLYQKRSKMIGIIIPFAENIFYSRIINGIQSVLQPAGYTCLISFSVGSNNKKYQAAINNFLQNNIDGIISSAFEMNENICRIPLVMYDSANISDDIIRIASDNAKGGKESVKLISTAKRAVLIQHLPLSLPTVKERVTSIINELKKRHLTYTLQEISEHDTYKLVAEKALHNIQTYDAIITINDIYAAHILKLARKMNLRVPADFQLVGYDNTEMSELTSPTLSTIDQQPELIGKTAAKRLLALIDGKSSTENSVIDIKTVKRESTK
Proteobacteria	Enterobacteria	4996	49314	LfaR	CKO_02295	A8AIV4_CITK8	U		Citrobacter koseri ATCC BAA-895	290338	Sugar utilization	null	MEQDHKMDKRLKISEIAARTQLSVSTVSRVLAGKANTSEKARNKVLECARELGVMDGMAAGRLLLNSLVVFAPQRAFDERSDIFYYRVIQNVSKGLTAYEVRLRYCALEELDSDAQLFLARMNEAETQAAILLGIDDPHIHDLAVDVGKPCVLINCRDQRMRLPAVSPDHRAIGELAADYLFSMGHRDVMTVLCLRRYTMELRLAGIRDAWQTHNLKFNDKRDLLVSPSFSAKEAEQRVSEWLANTPDKALPTAFLVGGDFMAAGVISALQKRGLRVPQDVSVMSIDGFNLAEIQDVPLTAVHVPRDELGTEAVHMLQQRLVRPNAPIGTLLLNGTLTVRESVRRIRPGKRRTAVEREGLYDA
Proteobacteria	Enterobacteria	4996	49316	LfaR	Ent638_1314	A4W8G5_ENT38	U		Enterobacter sp. 638	399742	Sugar utilization	null	MDKRLKIAEIAARTQLSISTVSRVLAGKANTSEKARQKVLECARELGVMDGMAAGRLLLNSLVVFAPQRAFDERSDIFYYRVIQSVSKGLASHEVRLRYCALEENDSDAQLFLARMNETDTQAAILLGIDDPHIHDLAVDIAKPCMLINCRDSRMRLPVVAPDHRAIGERAAEYLFEMGHREIMNVLCLRRYTMELRLAGIRDSWQTHNLKFNDKRDLLVVPSFSATETEQQVSEWLSGTPAKNLPTAFLVGGDFMAAGTISALQKHGLRVPQDVSVMSIDGFNLAAIQDVPLTAVHVPRDELGTEAVHMLQQRLMRPDAPVGTLLLNGTLTVRESVRRIRQGKRRTAVEREGLYDA
Proteobacteria	Enterobacteria	4996	49318	LfaR	ECA1966	Q6D5S4_PECAS	U		Erwinia carotovora subsp. atroseptica SCRI1043	218491	Sugar utilization	null	MKGNLKIREIAQRTGYSISTVSRVLSGQSNTSERAKADILNCARQCGVLADLANGRLLLNGLTIFAPPRAFDIRSDIFYHKVVQSIIDALKPHDVRVRYCGLEENDSDVALFLDKMRDPATEAALLIGIDDPYIHALAADSGKPCVLINCIDRKMRLPGVAPAHRLIGEFSAHYLFEQGHHTVLTLLCLRRYTMELRLDGIRDAYQHHNLSFSPEEHLLALDNFSTADAEHAMSDFLARCPQDKWPTAILAGGDFIAVGAVNALNKAGLRVPQDVSVMSMDGFNLSAIHDVPLTSVHVPREALGEEAVKLLQYRLIRPNAPVGNLLLNGTLVIRQSVRRLRGSKSVAPVQDKSLYD
Proteobacteria	Enterobacteria	4996	49320	LfaR	KPN_00854	A6T6R9_KLEP7	U		Klebsiella pneumoniae subsp. pneumoniae MGH 78578	272620	Sugar utilization	null	MDKKLRVAEIAARTGLSPSTVSRVLAGKANTSDKARRAVLECARELGVMQGLAAGRLLLNHLLVFAPQRAFDERSDIFYYRVIQSINNALAAHEVRLRYCALDENDSDANLFLARMNEPETQAAVLLGIDDPHIHGLAADLGKPCVLINCRDEGMRLPSIAPDHRLIGQCAARYLFDMGHRAVMNVMCLRRYTMELRLGGIQEAWRARNLRFTASRDLISVANFSARETEEQVGAWLDGLQGRPLPTAFLVGGDFMAAGTVSALQKRGLRVPQDVSVMSIDGFNLAAIQEVPLTAVHVPRDELGSEAVHLLQQRLLRPEAPHGSLLLHGTLVVRDSVRRIRPGKGHTAVEPQGLYDD
Proteobacteria	Enterobacteria	4996	49324	LfaR	Spro_3600	A8GHV6_SERP5	U		Serratia proteamaculans 568	399741	Sugar utilization	null	MNGKLKIQEIAHQTGLSISTVSRVLAGKSNTSVEARQKVLACAQQNGILQGISSGRLMLNSVMVFAPQRAFDVRTDIFYYKVIQGITAALAEHEVRIRYCGLEELHSDGALFLEKMSDPQTQAALIIGIDDEHIHQLAADLNKPCVLINCSDRQMRLDSVSPDHQLIGEFSANYLIQQGHSHILNLQCLRRHTMELRLAGIKQAYARHNIAFDEGRHLVTTSGFGSEEAEQALTTFINRVSQRSQLPTAILAGGDYMAVGAVKALNKLQLSVPGDISVMSTDGFNLAEIHDVPLTSVHVPRDELGYEAIQLLQRRMLRADAPPCNLLLHGKLAVRASVKRVSPHKTSPAVSTHDHRLYDV
Proteobacteria	Enterobacteria	4996	49325	LfaR	y3231	Q7CGW3_YERPE	U	*	Yersinia pestis KIM	187410	Sugar utilization	null	MNGKLKIQEIANQTGLSISTVSRVLAGKGNTSAKAKQQVMAYAKSQGILQNLSSGRLMLNNIMVFAPHRAFDVRTDIFYYKVIQGITQAVSQHEVMIRYCGLSETHSDISLFLDKMTHPQSEAAIIIGIDDPRIHALAASLHKPAVLINCRDKEMSLDSVSPDHQSIGEFSAHYLIQQGHRRILTLQCLRRNTMELRLLGIKDAFASNNMRFDDHQHLITTHGFGAEEAEQAITTFFTACEDESRLPTAILVGGDYMAVGAVNALNKLNVNVPNRVSVMSMDGFNLAEIHDVPLTAVHVPRDELGAEAIQLLQRRVLRPDAPFSNLLLQGKLVVRSSVKQVNQNRAMPAANKPTDQIYDL
Firmicutes	Lactobacillaceae	4615	44618	LJ1265	LBA1488	Q5FJ16_LACAC	U		Lactobacillus acidophilus NCFM	272621	Pentose utilization	null	MDLKMSDIAKMAGVSKAAVSFALNGKPGVSDETRKKIFKVIKDQGYEPLRKHKKGGVRKIASISLIIIQDRTGMMNRSYASLPFFDTLVSELSQNVSGAGGQMQIVNLDINHLHEGLNNEALQQSKASIVLATDLNQKQVQLINRKLRNVIFVDNYFEYIQADFVSIDNFQGAYRAGKFIVKKGYRKIGYVASNHAISNFLQRRSGFRKAMREANIQIPPEYVFSLNPTELRGSLPALFRQKNNWPEAIFCEDDYMALRLLNALTRQGIKVPQDIAVMGFDDISEDTMVIPELTTIHVPITQIVDQAINQLQCKVADTDWLPQKCFISTKLIERESL
Firmicutes	Lactobacillaceae	4615	44624	LJ1265	LJ1265	Q74J45_LACJO	U	*	Lactobacillus johnsonii NCC 533	257314	Pentose utilization	null	MKLKMSDIAEKAGVSKAAVSFALNGKAGVSEKTRKHIFKVIEEMGYEPLRKHKKGGVRKLTSISLVIIKTTTGLMNRSYASLPFFDSLVSNLSQNVGGSGGQVQIVTLNIRNLKQDIENSTALKKSKAAIVLATDLNKKQILFLDSKIKNAIFIDNYFEDVDADFVSIDNFQGGYNAGKFIIEKGYTQIGYVASNRIITNFLKRREGFRTALKEKNLEIPPDFVFSLNPVELRGTLPKFFYSNKKYPHAIFCEDDYMALRLVKELTKIGIKIPDQLAIMGFDDIFEDTMINPELTTIHVPIEQIVRQAINQLEEKVSNTHWLSQKSFISTKLIVRESLK
Firmicutes	Listeriaceae	5294	52061	Lmo0031	lin0030	Q92FS3_LISIN	U		Listeria innocua Clip11262	272626	Sugar utilization	null	MKKITIQEIAKLSGVSVSTVSRVINNSPSVSAAKRKKIQAIIDEHNYTPSVFARGMVNKQTKNIGVILPDISNPYFISLITQIQKFALDYMFSTILFNTMLAEPNNKNSKHPLTEEDYLKIILEKQVDGLLILGGEIDKEVVSKDYINALNQLNREIPVVVIGSKIPELNCLFIERNLKKGITTLVSHLTALDHKNIGFIGGEAGVKITSYRLESFKAAMASYNHSVNEDWIVLSDYYTADGYAAMTKLLENNTTLPTALVAINDNVAIGAIRAINDAKLSCPEDIAIVSCDQFMNGDYQTPRLTSMDQHNEYLGKMALLQLISAINGQVEPMIINHNPELIIRESCGSKL
Firmicutes	Listeriaceae	5294	52062	Lmo0031	lmo0031	Q8YAT2_LISMO	U	*	Listeria monocytogenes EGD-e	169963	Sugar utilization	null	MKKITIQEIAKLSGVSVSTVSRVLNNSPSVSAAKRKKIQAIIDEHNYTPSVFARGMVNKQTKNIGVILPDISNPYFISLITQIQKFALDYMFSTILFNTMLAEPDNKNNQHPLTEEDYLKIILEKQVDGLLILGGEIDKEIVPKEYITALNQLNNAIPVVVIGSKIPELNCLFIERNLKKGVTTLVSHLTALGHKNIGFIGGEAGVKITTYRLESFKEAMTSYQHPVNDDWVVLSDYYTADGYAAMTHLLENSTTLPTALVAINDNVAIGAIRAINDAKLSCPEDIAIVSCDQFMNGDYQTPRLTSMDQHNEYLGKMAILQLISAINGQVEPMIINHNPELIIRESCGSKL
Firmicutes	Lactobacillaceae	4569	44135	Lp_3221	LSEI_2103	Q036L9_LACC3	U		Lactobacillus casei ATCC 334	321967	Sugar utilization	null	MATISEIAKAAGVGVTTVSRYLNHHPYISAEKRTRIEKAIHQLGYTPSAAATSLRAQATGNIGVLVSRVTNPFFAGLFDAIERELHAHGYQVMITQTYDDPEAEERFLKQLKSRELDGVILASVEAPDRVMAVAKAFPGRVVVVNADVQIPGATSLVLPHYQATRDALDYLFNQGHRRFAYVSGGTISGAHHGQSRTQAFLDFMQAHQLLVAQDLLFGQIHTAKEGQAVGKQLASLAPNVRPDAVFTNSDEVAVGVIDSLLAADVKVPDDIAVMGYDDQPFAPFAKIPLTTVHQPVASMAAAATHELLKGLGRQVAQDTQPTLHLSLKIRQSA
Firmicutes	Lactobacillaceae	4569	44140	Lp_3221	lp_3221	F9UTC5_LACPL	U	*	Lactobacillus plantarum WCFS1	220668	Sugar utilization	null	MTTISEIAAEAGVGVGTVSRYLNHRPSVSVAKKKQIQAAIEKLDYTPNAIASQLRAQSTNTIGVLVSRISNPFFAQLFDALERELNGYGFQVMVMQTHDDALAEQHFLDKLKQQQVDGVILASIENQQLVAQLSATYANQMVLLNEEATDIGIPMISLNHYQATKDALAYLYHQGHRRIAYATGGDFPSTHHGRSRTQAYLDFCEEQQLVVNNNWVFAQQHTIADGQALGKQLASLNPSDRPTAVFTNSDEVAVGVIDELQQQHFRVPDDMAVMGYDDQPFAAVAQVPLTTVRQPVAAMAQLAVDQLLHHLGRLQRPELAIDLSLDLIKRKSA
Firmicutes	Lactobacillaceae	4569	44142	Lp_3221	LGG_02106	C7TEF8_LACRG	U		Lactobacillus rhamnosus GG	568703	Sugar utilization	null	MATISEIAAAAGVGVTTVSRYLNHHPYISADKKARIEAAIKTLGYTPSAAATSLRAQATGNIGVLVSRVTNPFFAGLFDAIERTLHAHGYQVMISQTYDNPDAEERFLNQLKSRELDGVILASVEVPARVATVAKAFPGRVVVVNADVQIPNAKSLVLPHYQATRDALDYLFAQGHRRFAYMTGGAIKSARHGQSRTQAFFDFMQARGLPVEPAWLFEQVHTATEGQTLGRQIAALAPAKRPDAIFTNSDEVAVGVVDSLVAANIAVPDDIAVMGYDDQPFAPFARVPLTTVHQPVAEMAQVATDLLLAGLGRGEPAVAPEPLTLTLKIRQSA
Firmicutes	Lactobacillaceae	4611	44560	LSEI_0368	LSEI_0368	Q03C45_LACC3	U	*	Lactobacillus casei ATCC 334	321967	Sugar utilization	null	MVIIVANKKNASIKDVARLSGVSVATVSRIMNDSGRYSQATRDKVLRVIEEIGYERNSLATSLRLNKSNMIGILVPNIANEFYASVLKKAEQALFKLGYSTIICNTERSIERETAYYRMLIEHRVDGLISVSSASNQMPLSTKYAIPIVFIDRDPHSDSEMIVTTDHYAAGKDLTHLLLSQADNLCLVMTKSRPSSTMDRVQAFKDELLSRGISSEGNILALNTTSDKFLQRHPDLKNFIQNEHQQGKRLGVFAINDNVAYMVLKVAEELDLRVPEDLIVTGFDGMSIAAISRPTITTIVQDSTTIANKASQLLVETIKKGVDQADKHGTVHVPYRLAQRKSTLPEDQV
Firmicutes	Lactobacillaceae	4611	44567	LSEI_0368	LGG_00419	C7T9M1_LACRG	U		Lactobacillus rhamnosus GG	568703	Sugar utilization	null	MANKKNASIKDVARLSGVSVATVSRIMNDTGRYSPKTRDKVLKVIEEIGYERNSLATSLRINKSNMIGILVPDIANEFYASVLKKSEQALFKLGYSTIICNTERSIERETAYYRMLIEHRVDGLISVSSASNQMPLSAKYAIPIVFIDRDPHSNSELIVTTNHYAAGKELAKLLLNQADDLCLVMTKSRPSSTMDRVQAFKDELAKSKMDTSGRILSLNTTSDKFLQPHPDLKEFIEKKCHKGKRLGVFAINDNVAYMVLRVADELGLKVPDELIVTGVDGMSIASISQPTITTIVQDSTAIADEASRLLVESIKKRGEKERLSGTIYIPYRLAQRKSTLPKK
Proteobacteria/Gamma	Enterobacteriales	1161	10629	MalI	CKO_01626	A8AGZ5_CITK8	U		Citrobacter koseri ATCC BAA-895	290338	Maltose utilization	null	MAIAKKTTIHDVALAAGVSVSTVSLVLSGKGRISSATGERVNAAIEQLGFVRNRQASALRGGQSGVIGLIVRDLSAPFYAELTAGLTEALEAQGRMVFLLHGGQDGEQLSQRFAMLLNQGVDGVVIAGAAGNSDALRERAEEKGIPVVFASRASYLEEVDTVRPDNMQAAQLLTEHLIRLGHQRIAWLGGQSSSLTRAERVGGYCATLLKFGLPFHSDWVLECASSQKQAAEAITALLRHNPTISAVVCYNETIAMGAWFGLMKAGRQSGEIGVDRYFEQQISLAAFADVAENALDDLPIIWASTPAREIGYTLAERILQRIGHEESHSRSQTISARLVTQK
Proteobacteria/Gamma	Enterobacteriales	1161	10631	MalI	Ent638_1828	A4W9X7_ENT38	U		Enterobacter sp. 638	399742	Maltose utilization	null	MSVAKKITINDVALAAGVSVSTVSLVLSGKGRISAATGQRVNDAVEQLGFVRNRQAASLRGGQSGVIGLIVRDLTSPFYAELTAGLTEALEAQGRMVFLMHGGREPEQLLSRLDMLLTQGVDGVIIAGASGAGSELCARAADKGIPLVFASRASYLDEADTLRPDNMQAAQMLTEHLIRRGHQRIAWLGGKSSSLTRAERVGGYCATLIKYGLPFHSEWVVECESSQKKAAEAMGALLSSNPTISAVICYNDIIAMGAWFGLIRAGRQTGEGGVEAFFDHQVALGAFADVGENALDDLPIVWATTPAREMGYTLADRIMQRIDKSEVQAGHQIVSARLVTVK
Proteobacteria/Gamma	Enterobacteriales	1161	10634	MalI	b1620	MALI_ECOLI	R	*	Escherichia coli str. K-12 substr. MG1655	511145	Maltose utilization	null	MATAKKITIHDVALAAGVSVSTVSLVLSGKGRISTATGERVNAAIEELGFVRNRQASALRGGQSGVIGLIVRDLSAPFYAELTAGLTEALEAQGRMVFLLHGGKDGEQLAQRFSLLLNQGVDGVVIAGAAGSSDDLRRMAEEKAIPVIFASRASYLDDVDTVRPDNMQAAQLLTEHLIRNGHQRIAWLGGQSSSLTRAERVGGYCATLLKFGLPFHSDWVLECTSSQKQAAEAITALLRHNPTISAVVCYNETIAMGAWFGLLKAGRQSGESGVDRYFEQQVSLAAFTDATPTTLDDIPVTWASTPARELGITLADRMMQKITHEETHSRNLIIPARLIAAK
Proteobacteria/Gamma	Enterobacteriales	1161	10635	MalI	KPN_01513	A6T8M3_KLEP7	U		Klebsiella pneumoniae subsp. pneumoniae MGH 78578	272620	Maltose utilization	null	MAIAKKITINDVALAAGVSVSTVSLVLSGKGRISSATGERVNQAIEQLGFVRNRQAASLRGGQSGVIGLIVSDLSKPFYAELTAGLTDALERQGKMVFLTQGGRSGEKMAQRFDTLAAQGVDGVIIAGAIDRGSELRERAAEAGVPLVFASRASYLDDVDLIRPDNMQAAQLVTEHLIRRGHQRIAWLGGQSASLTRAERVGGYCATLLKYGLPFHSEWVLECESSQKQAAEAMTGLLRQNPTITAVLCYNNVVATGAWFGLLRAGRQSGEDGVESYFEQRVALAAFADVPEAALDDLPLTWVTTPAREMGKSLADSMLRRLEEGTGETRNQIMPPRLVTRK
Proteobacteria/Gamma	Enterobacteriales	1161	10639	MalI	Spro_2271	A8GE32_SERP5	U		Serratia proteamaculans 568	399741	Maltose utilization	null	MPRIGLAEVMTIKKITITDVAQQAGVSVTTVSLVLSGKGRISPTTVARVNQAIERLGYVRNRQAATLRGGESGVIGLILRDICEPFYAEMTAGLSEVLEAHGKVLFLTQSGRDGKGLMRCFDTLLEHGIDGMVLAGGVRSAEGLKEKAAEQGVPLVCAARSNGLEGVDVVRPDNMQAAKMATEFLIKRGHSQIAYLGGQSSSLTRAERLGGFCATLVQYGLPFRSDWIVECDCHQRAAAEAAENLLRQHPNISALVCHKASVALGAYFGIVRSGRSIGSEGVDTYYGQQVALIGFGDVPEAELTEPPLTLVSSSAREVGRSAASRLLQRIADADLPPQNVILPPLLIKRGSA
Proteobacteria/Gamma	Vibrionales	5304	52120	MalI	VAS14_19066	Q1ZKK8_PHOAS	U		Vibrio angustum S14	314292	Maltose utilization	null	MAKSSKVKITDVADYAGVSVSTVSLVLGNKGRISKATIDKVNQAVEALGYVRNNAAANLRSNYSNLIGWILADITDPFYTEVTAGLSDELEQHDHMLFLAQSNHQADKLIQCVQSMIQQGVAGIAFSPVREATNQVLEMAKQANIPAVCLARSAVNNEVDYIGPDNHQAAILATQHLIQQGHRHIAYIGGSSDSLTRAERIGGYGTTLMQYGLPFKNEWIIEAQNNQCQAADHVQQLLTQHPKITALLCHRPAIALGAMYGIQRVGKSVGKDNYIGQQIGLIGFDDTPEAALTQPSLTMISSPTRQMGQLAGQRLLAKMKAHNETAQQFILPPQLIERGSA
Proteobacteria/Gamma	Vibrionales	5304	52123	MalI	VF_1720	Q5E431_VIBF1	U	*	Vibrio fischeri ES114	312309	Maltose utilization	null	MINKKANIKDVAERAGVSVTTVSMVLSEKGRISSDTIDKVNQAVQDLGYIKNRTASNLRSQKSTLIGLILRDISDPYYAEVAAGISEVLEEKGYMLFLAQSGTSQEKFDQCLATMIAQDIGGIIFCPIRDSELPNLDKVKNVGLPIVCVARAKINQPIDFVGPDNMQAAKIATEYLIKQGHRQIAYVGGQSDSLSRAERLGGYCSTLMQFGLPFKSEWVVECDKSQTASAEAVSQLINKNPKITAILCHYSSTAFGAVYGVNRANRSVGKDNYIGQQVAIIGFDDVPEAELIQPSLTFVSSPIRDIGRQAGHRLINQINDKGSVPQSLILSPELIARNSA
Proteobacteria/Gamma	Vibrionales	5304	52126	MalI	VSAL_I1618	B6ELY3_ALISL	U		Vibrio salmonicida LFI1238	316275	Maltose utilization	null	MTNKKANIKDVAKRAGVSVTTVSMALSDKGRISPETIQKVNQAVQELGYIKNRTASNLSSKQSLLIGLILRDISDPYYAEIAAGLSEVLEDKGYMLFLTQSGTNQDKFDQCIETMVAQNVGGIVFCPIRDIGVPNIQKIQDLNLPIVCVARAKVGQQIDFVGPDNMQAAKIATEYLIKQGHRQIAYVGGQSDSLSRAERLGGYCSTLMQFGLPFKPEWVVECDKSQTAAAEAVNQLINKNPKITAILCHYSSTAFGAVYGVNRSNRTVGKDNYIGQQVAIIGFDDVPEAELIQPSLTFVSSPIRDIGRQAGHRLIHQINNKDSAPQSLILNPELIARDSA
Proteobacteria/Gamma	Vibrionales	5304	52127	MalI	VSAK1_23534	A6CWB3_9VIBR	U		Vibrio shilonii AK1	391591	Maltose utilization	null	MSSKKVTITEVAKYAGVSVTTVSMVLGNKGRISPDTIDKVNQAVEELGYIRNRAAANLRSNSSEIIGLILKDISDPYYSEVASGISEEIERQGYMLILAQSGDSQERFEKCMMTMSRQGVGGIAFCPIADNQQFNIEKMKEQNLPLVCVSRASLDKQIDFVGPDNNYAAKLATEHLIKQGHRRIAYVGGASSSLCRAERIGGYCSTLMQFGLPFKPEWVVECEKGQKAAANAVQTLLSEHPQITAILCHHSSTALGAVYGIHRSGRQIGKDQFIGEQVSLIGFDDVEEAELTEPPLTFVNFNAREMGRQAAKRLISQLEQEHSQPYSLIQPPQLIIRESA
Proteobacteria/Gamma	Alteromonadales	5246	51702	MalR	ATW7_07389	A0Y6J2_9GAMM	U		Alteromonadales bacterium TW-7	156578	Maltodextrin utilization, Maltose utilization	Maltose	MKGKATSFDIAHYAGVSQSTVSRALRNSPLVNEETRKRVHDIAKKLNYKVDKNASNLRTQQSSTLALLLFEDPTSDESQINPFFLSMLGSITRACAKEGYDLLVSFQSASADWQADYEDSHRADGIILLGYGDYIDFQPKFKTLLEQNTKFVCWGATVDNRPDLTVCCDNYGGGKQAAAHFVAHNRQDCAFIGDASDHSPEFFARFQGFKDELEASNIAINERKMANAISTEESGYHATRSLIANNIKFNALFAASDLIAIGAIRALKEANINVPKDVAVVGFDNIAIASFVNPPLTTIEQNTTLAGQMLVENLLKLIREEDVQSTLLPPVLIARGSS
Proteobacteria/Gamma	Alteromonadales	5246	51703	MalR	MADE_01891	F2GC37_ALTMD	U		Alteromonas macleodii 'Deep ecotype'	314275	Maltodextrin utilization, Maltose utilization	Maltose	MVFMKEKATSFDIAHLAGVSQSTVSRALNNSPLVNQETRDRVQRIARELNYKVDKNASNLRKQKSSTIALLLFEDPTSDDSMINPFFLAMLGSITRACAQANYDLLVSFQNLEDDWHAEYEDSNKADGIILLGYGDYTDYQNKVAQLESQGTHFVRWGAPDEAHPGVSIGCDNYQGGQSITEHLIALGKRSFAFIGDNGEHAPEFKARYNGYFETLMAHGLDKSSVQENANSTEDAGSEAIKSLLQNKALPQAIVCASDLIAMGVLRALRQAKVNVPDDVAVVGYDNIAVSAYTTPSLTTVQQNTKLAGELLVNTLLKAINNEEVEDYLMPADIIIRQSCGSD
Proteobacteria/Gamma	Alteromonadales	5246	51704	MalR	CPS_0974	Q487P2_COLP3	U	*	Colwellia psychrerythraea 34H	167879	Maltodextrin utilization, Maltose utilization	Maltose	MKEKSTSFDIAYRAGVSQSTVSRALRNSPLVNEATREKIQAIAKELNYKVDKNASNLRSQQSDTIALLLFEDPTNDDSAINPFFLSMLGSITRACSQKGYDLLVSFQQASDDWHADFEDSNKADGLILLGYGDYVDYEEKLVKLLDQGTHFVRWGAEVKNLPLISVGCDNYQGGKEMTEHLIKKGRKNLAFLGSASTHAPEFFERYKGHCQSLADNNMAVNQGLQFNALYTEEAGYQAACQLISSGEPFDAICAACDLIAIGAMRALQEHNIDIPEQVALVGFDDIAIASFTFPALTTVKQDTQLAGELLVNTLLAMISGEEVKTTLIPPELVIRKSCGS
Proteobacteria/Gamma	Alteromonadales	5246	51705	MalR	GHTCC_010100006902	-			Glaciecola sp. HTCC2999	455436	Maltodextrin utilization, Maltose utilization	Maltose	MKSKATSFDIAYLAGVSQSTVSRALSNSSLVNAETRERVQQIAKELNYKVDKNASNLRKQRSSTIALLLFEDPSSDDSQINPFFIAMLGSITKACSAAGYDLLVSFQNLQDDWHAEYEDSHKADGLILLGYGDYLDYQQKITQLEEQNTHFVRWGAHDPNHPGVSVGSNNYQGGFMITEHLIKQGRQRFAFIGEAGNHYPEFMARFNGHTDALSAHQLDEYFVGQFDAIFTEDAGYEAAMVLFEDDAKPDAIVCASDLIATGVLRAMNDNGLHCPNDIAVVGYDNIPVSAYTTPALTTVQQNTKLAGELLVSNLIKLINGQSVTDQLMSGELVIRKSS
Proteobacteria/Gamma	Alteromonadales	5246	51708	MalR	Patl_2185	Q15TT5_PSEA6	U		Pseudoalteromonas atlantica T6c	342610	Maltodextrin utilization, Maltose utilization	Maltose	MKAKATSFDIAHQAGVSQSTVSRALRDSPLVNKETREKVQAIALELNYKVDKNASNLRRQHSKTLALLLFEDPTSDNSLINPFFLSMLGSITRASAKAGYDLLISFQNLSDDWHAEYEDSNKADGIILLGYGDYTEYRTKLSQLEAQNTHFVRWGALDDEHPGVSIGCDNFQGGFDVTQHLLGLGRHQFAFIGGADTRAPEFFARYQGYHKALTLADVAQSAVQQDAISTEDSGYSATLALLKRYPDIDAIVCASDLIAIGVLRALRDSNIPIPHQIAVVGFDNVPVAGFATPALTTVKQDTILAGEILVDSLLKLIEGEKVEHYLMPVDLVIRQSSGA
Proteobacteria/Gamma	Alteromonadales	5246	51709	MalR	PSHAa1363	Q3IL39_PSEHT	U		Pseudoalteromonas haloplanktis TAC125	326442	Maltodextrin utilization, Maltose utilization	Maltose	MKGKATSFDIAHYAGVSQSTVSRALRNSPLVNEETRKRVFDIAKKLNYKVDKNASNLRTQQSSTLALLLFEDPTSDESQINPFFLAMLGSITRACAKEGYDLLVSFQSASADWQADYEDSHRADGIILLGYGDYLDYQPKFNTLLEQNTKFVCWGATVDNRPDLTVCCDNYGGGKLAAAHLIARNRTDCAFIGDASDHSPEFFARFQGFKDELSANNVTLNERKTANAISTEESGYHATRSLIANNIKFNALFAASDLIAIGAIRALKEAGISVPKDVAVIGFDNIAIASYTNPPLTTIEQNTTVAGQMLVENLLKLIRGEAVQSTLLPPILIARGSS
Proteobacteria/Gamma	Alteromonadales	5246	51710	MalR	PTD2_18715	A4CBZ6_9GAMM	U		Pseudoalteromonas tunicata D2	87626	Maltodextrin utilization, Maltose utilization	Maltose	MKGKATSFDIAHYAGVSQSTVSRALRNSPLVNEETRKKVQEVAKQLNYKVDKNASNLRTQQSSTLALLLFEDPTADDSQINPFFLAMLGSITRACARAGYDLLVSFQQASEDWHADYEDSHRADGLILLGYGDFIDYQEKLDKLMSTATHFVCWGAQVAGHPDLSLSCDNEQGGRLAAEHLISLNRTHCAFIGDASEHSPEFNARFNGFKGVFTEHGFTIDNRKIANAISTDESGYHATKSLISNNVQFNALFAASDLIAIGAIRALKEANLRVPEDVAVIGFDDIPMASFINPPLTTISQSTSKAGEMLVENLLKLIAGQPVEHKVLLPELVIRQSCH
Firmicutes	Lactobacillaceae	3576	35033	MalR	LVIS_0356	Q03TF1_LACBA	U		Lactobacillus brevis ATCC 367	387344	Maltodextrin utilization, Maltose utilization	Maltose	MLTIRDIAAKAGVSVSTASRALNNNPRISQATRERIQALAEAEGYLPNYNAKNLTAGESNAVGVVFATADRSQPENPFFIDILRGINAQLVQRDYVLSVAISKTADELLKNVKAMVAQGKIKRFVLLYAHQDDPIAAFLRQHHLRFVTIGQPDDNANDYFVDNDNLEAGIGGATFLLNQLQVKHPVFVESTHDWAYEQQRRQGYERVAATFNVEPLTCRLGELNRVRAFIKRHPEIDGIMATDDFNGIEFYRLMREQYGINHFPMVSFNQSLPNGLTDADLHSVNLFPEKMGSATVALLFSDKEPLETPTPGQIKIPFEIK
Firmicutes	Lactobacillaceae	3576	35036	MalR	LAF_0023	B2GEX0_LACF3	U		Lactobacillus fermentum IFO 3956	334390	Maltodextrin utilization, Maltose utilization	Maltose	MATIKDIAKLAGVSISTASRALNDNPRISEATRTKVKQIAAELGYSPNYNAQTLTRGEANMVGLVFPVTDQSALANPFHIDLMRGAGVALEQRHYTMMVAIAETEERLLETVKSMVTQSKVHNFLLLYTKEKDPVTDYLRDAGINFVVIGHPEKQGDRFVDNDNIQAGFLATQKLLDDHHCQHVAFVTSPHHWTFEVDRQLGCRQCLNERGLGGTEWVVEEDNAPQFFAQHPEIDGLVCADDILFLQIYRQLEALGRQDQLAIICFNNSRLLGRLLPAIDRVDLRPRQLGIAAVELLFNRQADHQFISFAL
Firmicutes	Lactobacillaceae	3576	35039	MalR	lp_0172	F9USY4_LACPL	U	*	Lactobacillus plantarum WCFS1	220668	Maltodextrin utilization, Maltose utilization	Maltose	MATIKDVAQRAGVSPSTASRAMHGSKIISKPTRDKVIKAARELNYAPDFNAQNLATKASNTIGVVLPVDHHEIFSNPFFLEMIRGINEVCSKNGAMTTLATGISSDELVHNIDVMIAQGHIKTFILLYSEKNDPVVERLKQFDVQYVVIGKPYQDVNKTSYVDNDNIQAGTDAAQYLIDHGHRRIGFLYSDLSRMVQSDRMLGYQRVMMQNQLPNIMLEERFETHAAGVKTLHKFFEQYPDVTGFVAVDDMLALKLQQVLHNDPNWKVKQFSLIGFNNSIFSDLAHPMLTSIAVFPQRLGEEAAKIAMADHPADELSTAVIVPHQIVKRHSVHQIKSLQ
Firmicutes	Lactobacillaceae	3576	35040	MalR	LAR_0049	B2G533_LACRJ	U		Lactobacillus reuteri JCM 1112	557433	Maltodextrin utilization, Maltose utilization	Maltose	MATIKDIAQKAGVSVSTASRALNHNPRISEKTRQRIATIAKELGYQPNYNAQNLTRGESNMVGIIFPVTSDTAPANPFHIDLLRGISMALKPIHYEMVVAIAPTTTDLLQSVKSMVEQSKVHNFLVLYTVKDDPITNYLRQNNLNFVVIGHPDKVQDRFVDNDNVAAGQAATDYLMDHQEVSHPVFLQSASNWAFEQDRHQGYEQSMQNHQLPALSWRYSPTGTAVKDFIKQHPQIDSIVCVDDLLLVRLIRQLQEFNLPTICFNNSRLMGMLINQEEKVDLQPRKLGQQAVELLFNPEEQYRIVDFKINS
Firmicutes	Lactobacillaceae	3576	35043	MalR	LSL_1283	Q1WSN9_LACS1	U		Lactobacillus salivarius subsp. salivarius UCC118	362948	Maltodextrin utilization, Maltose utilization	Maltose	MTTIRDVAKLAGVSPSTASRAMHDSNLISDKTKEKVRKAMEELNFSPNYAAQSLANRFSKTIGVILPIREESVGNNPFFIQILQGISTICNAHDYIVSLATGQKEEELIQNIDNLINRGNVKNFIFLYSKENDVILEYVKKQKDVFYVIVGKPYDNIESTSYVDNDNIQASSDATNYLINKGHQNICYVYTNLDEMVQDDRYVGYRLAVKEKLFNSYKLNFSSDNREENKEKLLTFIKANPQVNGIVACDDITGLTVQQILIESGIDLEKYEIVTFNNSIYTQIAKPMITAVEIFPRFLGSEAAVLAINNGQKTLDVGTKHIIVPHKIIEH
Firmicutes	Lactobacillaceae	3576	35044	MalR	LEUM_0891	Q03XS4_LEUMM	U		Leuconostoc mesenteroides subsp. mesenteroides ATCC 8293	203120	Maltodextrin utilization, Maltose utilization	Maltose	MVTIQDIANKTGVAISTVSRALGDSPKISLRTKERIRKAARDMGYTPNFAARNLTQTESNTVGVVFQPQSEGNTDNDFAMQILFGINAQLIARRYLLTTATGSNWSEVFNAVKMMVEAGQVRRFILLYTVENDPIAELLRENHARVVVTGEPEIATNILYVDNDNRKASAEATKNLVSSFQLKSPVFVRTLADWRFEDNRELGFREAQEEGDVLSLPLEFTQQKQVLQKYFEQHQTVDGIVASDDKLGYLARNQAQAHLPSHPKLPTIAFNCSEYARLGGKNFYSVDVLPRTLGSEAVRLLFNDQQSPLEKTEASSVIVPYRIPKIGE
Firmicutes	Lactobacillaceae	3576	35046	MalR	PEPE_0969	Q03FJ7_PEDPA	U		Pediococcus pentosaceus ATCC 25745	278197	Maltodextrin utilization, Maltose utilization	Maltose	MITIKDVAKEAGVSVSTASRALNNNPRISATTIEKVKKIAKELDYKPNASAKTLSLGKANEIGVIYPVTADEDPANPFHIDLMRGINTALQLKNFVLSVAICQTEEALLNNVKRMVEQSQIHDFLLLYSKADDVVTNYLRKQELNFVIIGEPTNENDRFIDNDNILAGREVTEFMFNQYNAKHPLFLRSTYNWEYEKKRELGYQQVMSTKSGSSPLIYKLEKNDNKVAIDKYMKHHFEIDAIIGADDIELLSFYHLLKDNQHIKNIPAICFNNSRLISLAGPTVNKVDLRPRELGKKAVELLFDSELRKATVGFDII
Proteobacteria/Gamma	Shewanellaceae	599	5664	MalR	Sama_1655	A1S655_SHEAM	U		Shewanella amazonensis SB2B	326297	Maltodextrin utilization	Maltose	MSLPLCVGAVASGPSKYNKSPVMASKATSIDIAYRAGVSQSTVSRALRDSPLVSPETKEKIRAIARELNYKVDKNASNLRTQNSHTLALLLCEDPTNDDSLINPFFLSMLGSITRATAKQGYDLLVSFQQLSSDWHADYEDSNKADGIILLGYGDFVDYEHKLERLLAQNTHFVIWGAEHNKSTVASVGCDNQQGGLIATEHLLSLGRKSVAFLGDASSHSPEFRDRYLGHVRALKDAGLVADKRCQVDAISTESAGFDAANKLIRKGAQFDAIFAASDLIAIGAIRALKEAGLRVPEDVAVVGYDDIPVASFANPPLTTIKQNTQLAGEMLVESLLKLIHGEAVPPRLIPTSLVVRKSCGIDLGD
Proteobacteria/Gamma	Shewanellaceae	599	5658	MalR	Sbal_2356	A3D536_SHEB5	U		Shewanella baltica OS155	325240	Maltodextrin utilization	Maltose	MASKATSIDIAYRAGVSQSTVSRALRNSPLVNLETRQRIQAIAKELNYKVDKNASNLRTQNSHTLALLLCEDPTNDDSLINPFFLSMLGSITRATAQQGYDLLVSFQQLSSDWHADYEDSNKADGIILLGYGDYMDYEQKLERLLAQNTHFVIWGAEHNNKSVLSIGCDNHQGGLIATEHLISLGRNAFAFLGDASSHSPEFRDRYLGHVKALQTANIPVDRTKQVSAISTESSGYDAAMVLIAQGAKFDAIFAASDLIAIGAIRALKEKGISVPEQVAVVGYDDIPVASFANPPLTTIKQNTQLAGEILVDSVLKLIRGQEVSAQLIPTTLVVRSSCGIDSAPLKPL
Proteobacteria/Gamma	Shewanellaceae	599	5662	MalR	Sden_1820	Q12N72_SHEDO	U		Shewanella denitrificans OS217	318161	Maltodextrin utilization	Maltose	MASKATSIDIAYRAGVSQSTVSRALRNSPLVNPETRQRIQAIAKELNYKVDKNASNLRTQNSHTLALLICEDPTNDDSLINPFFLSMLGSITRATAQQGYDLLVSFQQLSSDWHADYEDSNKADGIILLGYGDYMDYEQKLLKLLEQDTHFVIWGAEHNNKSVLSVGCDNHQGGVSATEHLLSLGVSDIAFLGDASSHSPEFRDRYLGHVSAMKAKGIKADKRKQFDAINTEASGFDAANLLLDKGLSFDGIFAASDLIAIGAMRALHLRGVRVPDDVAIVGYDDIPVASFANPPLTTVKQNTRLAGEILVDSVLKLIRGQAVSPQLIQTELVVRRSCGESDPKA
Proteobacteria/Gamma	Shewanellaceae	599	5663	MalR	Sfri_1772	Q083E3_SHEFN	U	*	Shewanella frigidimarina NCIMB 400	318167	Maltodextrin utilization	Maltose	MASKATSIDIAYRAGVSQSTVSRALRNSPLVNLETRQRIQAIAKELNYKVDKNASNLRMQNSHTLALLICEDPTNDESMINPFFLSMLGSITRATARQGYDLLVSFQQLSTDWHADYEDSNKADGIILLGYGDYMDYAHKLDKLIEKNTHFVIWGAEHNNKAVLSIGCDNHQGGFVATEHLLGLGHKHIAFLGDSSSRSPEFRDRYLGHVDALQSTGIEADTQLQHDAINTEASGYHAANVLLDSGVTFDAIFTASDLIAIGAIRALKKRGVLVPEQVAVVGYDDIPVASFANPALTTIKQDTQFAGEILVESVLKLIRGQEVSQRLIKTHLVVRSSCGANVEDN
Proteobacteria/Gamma	Shewanellaceae	599	5665	MalR	Shew_1870	A3QE38_SHELP	U		Shewanella loihica PV-4	323850	Maltodextrin utilization	Maltose	MTTKATSIDIAYRAGVSQSTVSRALRNSPLVNEETRLRVQAIAKELNYKVDKNASNLRTQSSLTLALLLCEDPTNDDSLINPFFLSMLGSITRATAQQGYDLLVSFQQLSSDWHADYEDSNKADGIILLGYGDYMDYEEKLNKLAAQNTHLVIWGPAQHKSSVLSIGCDNRQGGVLATEHLLAKGRRNIAFIGDASSHSPEFQARYLGHQQALKAAGVPLQKNLQVDAISTESSGFEAANQLLAQKRSFDAIFAASDLIAIGAMRALKEQGLRVPEDVSVVGYDDIPVASFANPPLTTIKQNTKLAGEILVESLLKQIKGQEVSNQLIPTSLIERESCGEKR
Proteobacteria/Gamma	Shewanellaceae	599	5655	MalR	SO_2244	Q8EEW8_SHEON	U		Shewanella oneidensis MR-1	211586	Maltodextrin utilization	Maltose	MVTFAMASKATSIDIAYRAGVSQSTVSRALRNSPLVNLETRQRIQAIAKELNYKVDKNASNLRTQNSHTLALLLCEDPTNDDSLINPFFLSMLGSITRATAQQGYDLLVSFQQLSSDWHADYEDSNKADGIILLGYGDYMDYEQKLEKLLAQHTHFVIWGAEHNNKSVLSIGCDNHQGGLIATEHLISLGRKAFAFLGDASSHSPEFRDRYLGHLKALQTAGLSVVAERQISAISTESAGYDAAMALMEKGLMFDAIFAASDLIAIGAIRALKEKGILVPEQVAVVGYDDIPVASFANPPLTTIKQNTQLAGEILVESLLKLIRGQAVGPQLIPTTLVVRSSCGIDHTPLD
Proteobacteria/Gamma	Shewanellaceae	599	5668	MalR	swp_2690	B8CMN2_SHEPW	U		Shewanella piezotolerans WP3	225849	Maltodextrin utilization	Maltose	MVTKATSIDIAYKAGVSQSTVSRALRDSPLVNLETRQRIQAIAKELNYKVDKNASNLRMQNSQTLALLLCEDPTNDDSLINPFFLSMLGSITRASAQKGYDLLVSFQQLSSDWHADYEDSNKADGIILLGYGDFVDYERKLAKLLEQNTHFVIWGAEHNHKSVLTIGCDNHQGGVSATEHLLSKGHKNIAFIGDSSSHSPEFRDRYLGHLAALKKAGIKDNSAMQFAAISTETSGFDATNALLNSGESFDAIFAASDLIAIGAIRALNARGLKVPADVAVIGYDDIPVASFANPPLTTIKQNTKLAGEILVDSVLKLINGEQVSPQLIPTNVVIRQST
Proteobacteria/Gamma	Shewanellaceae	599	5661	MalR	Shewana3_2252	A0KXG2_SHESA	U		Shewanella sp ANA-3	94122	Maltodextrin utilization	Maltose	MASKATSIDIAYRAGVSQSTVSRALRNSPLVNLETRQRIQAIAKELNYKVDKNASNLRTQNSHTLALLLCEDPTNDDSLINPFFLSMLGSITRATAQQGYDLLVSFQQLSSDWHADYEDSNKADGIILLGYGDYMDYEQKLEKLLAQNTHFVIWGAEHNNKSVLSIGCDNHQGGLIATEHLISLGRKDFAFLGGASSHCPEFRDRYLGHVKALQTAGLTVDPRRQISAISTEGAGYYATLELLDKGLNFDAIFAASDLIAIGAIRALKEKGILVPEQVAVVGYDDIPVASFANPPLTTIKQNTQLAGEILVESLLKLIRGQAVSPQLIPTTLVVRSSCGIDCTPLA
Proteobacteria/Gamma	Shewanellaceae	599	5659	MalR	Shewmr4_1769	Q0HJC4_SHESM	U		Shewanella sp MR-4	60480	Maltodextrin utilization	Maltose	MASKATSIDIAYRAGVSQSTVSRALRNSPLVNLETRQRIQAIAKELNYKVDKNASNLRTQNSHTLALLLCEDPTNDDSLINPFFLSMLGSITRATAQQGYDLLVSFQQLSSDWHADYEDSNKADGIILLGYGDYMDYEQKLEKLLAQNTHFVIWGAEHNNKSVLSIGCDNHQGGLIATEHLISLGRKAFAFLGDASSHSPEFRDRYLGHVKALETAGLPVVAARQISAISTESAGYDAAMALLESGLSVDAIFAASDLIAIGAIRALKEKGILVPEQVAVVGYDDIPVASFANPPLTTIKQNTQLAGEILVESLLKLIRGQAVTPQLIPTTLVVRSSCGIDHTPLA
Proteobacteria/Gamma	Shewanellaceae	599	5660	MalR	Shewmr7_1847	Q0HVL6_SHESR	U		Shewanella sp MR-7	60481	Maltodextrin utilization	Maltose	MASKATSIDIAYRAGVSQSTVSRALRNSPLVNLETRQRIQAIAKELNYKVDKNASNLRTQNSHTLALLLCEDPTNDDSLINPFFLSMLGSITRATAQQGYDLLVSFQQLSSDWHADYEDSNKADGIILLGYGDYMDYEQKLEKLLAQNTHFVIWGAEHNNKSVLSIGCDNHQGGLIATEHLISLGRKAFAFLGDASSHSPEFRDRYLGHVKALQTAGLPVVAARQISAISTESAGYDAAMALLESGLSVDAIFAASDLIAIGAIRALKEKGILVPEQVAVVGYDDIPVASFANPPLTTIKQNTQLAGEILVESLLKLIRGQAVTPQLIPTTLVVRSSCGIDHTPLA
Proteobacteria/Gamma	Shewanellaceae	599	5670	MalR	Swoo_2196	B1KDT1_SHEWM	U		Shewanella woodyi ATCC 51908	392500	Maltodextrin utilization	Maltose	MASKATSIDIAYRAGVSQSTVSRALRNSPLVNLETRQKIHEIAKELNYKVDKNASNLRTQNSLTLALLLCEDPTNDDSLINPFFLSMLGSITRATAQQGYDLLVSFQQLSSDWHGDYEDSNKADGIILLGYGDYLDYESKLDKLLSQNTHFVIWGAEHNNNAVLSIGCDNVQGGMIATEHLIEQGRKQFAFLGGASSHSPEFRDRYLGHTKAIKQAGLSHSKKRQFSAISTEESGFDATKELLASGQSFDAIFAASDLIAIGAIRALNEQGLQVPEDVAVVGYDDIPVASFANPPLTTVKQNTQLAGEILVESLLKLIKGEEVSGQLIPTSLVIRGSSSI
Proteobacteria/Alpha	Sphingomonadales	5574	54645	MalR	ELI_03155	Q2NC68_ERYLH	U		Erythrobacter litoralis HTCC2594	314225	Maltose utilization	Maltose	MGRAPTGKPTSFDIAYLAGVSQPTVSRALRGDKSVSDATRQKIEKIARELKYTVDKNASSLRTQRSNTIALLFFEDPTPDESMINPFFLAMLGSITRAASKRGLDLLISFQQMENDWHTQYQDSHRADGLILLGYGDYTLYEERLQQLARQGTHFVRWGSVRDDNIGATIGSDNFGAGRTAGEHLVEIGCKRVAFLGQADEHYPEFADRYAGLGAALEAAGLDVDDTLQADALTSEEEGYAAARSLLDANRTFDGLFAASDLIATGALRALAEAGKSVPGDVAVIGFDNIPAAALTAPPLTTVMQDMRGAGEALLASLVEQIDGADATSRTLPTTLVKRASTGD
Proteobacteria/Alpha	Sphingomonadales	5574	54647	MalR	Saro_1887	Q2G746_NOVAD	U	*	Novosphingobium aromaticivorans DSM 12444	279238	Maltose utilization	Maltose	MGRKPSNKPTSFDIAYLAGVSQPTVSRALRGSKSVSLATRQKIEAIARQLNYTVDKNASSLRSQRSNTLALLFFEDPTPDESNINPFFLAMLGSITRHCANRGLDLLISFQKLDDDWHKRYQDSHRADGLILLGYGDYTLYGSRLRQLIRSGTHFVRWGSVDEGTIGATIGSDNFGAGRLAGEHLLARGRKRIAFLGQADSHYPEFEQRYAGLSKAIRTAGLEPDPDLVVDATSSEEIGYNAARELLSRGKTFDAIFAASDLIAIGAMRALAEAGRSVPADVAVVGFDDIPAASLTTPPLTTIMQDTRLAGEALVDCVLGQVEGRPPSPRILPARLVVRASSGG
Proteobacteria/Alpha	Sphingomonadales	5574	54650	MalR	Sala_0597	Q1GVK4_SPHAL	U		Sphingopyxis alaskensis RB2256	317655	Maltose utilization	Maltose	MGRPPSGKPTSFDIAYLAGVSQPTVSRALRGSKSVSAATRANIERIARELNYTVDKNASSLRSQRTHTLALLFFEDPTPDDSMINPFFLSMLGSITRQCALRGYDLLISFQQMHNDWHVDYQDSHRSDGIILLGYGDYQLYREKLEHLVAMDTKFVRWGSVSEDDIGLTVGSDNIGAGEQAGAHLIEIGRRRIAFLGDASDHAPEFHDRYRGLCRAMRAAGIEPDPALQRNAVSSEASGHAAAKTLLDSGACFDAIFAASDLIAIGAMRALTEAGLTMPQDVAIIGFDDIPAANLTSPTLTTVMQDMKGAGELLVDALLRRIDGAEAERRVLPTRLVKRQSTAV
Firmicutes	Staphylococcaceae	681	6691	MalR	MCCL_0356	B9EA02_MACCJ	U		Macrococcus caseolyticus JCSC5402	458233	Maltodextrin utilization, Maltose utilization	Maltose	MVTIKDVAKRASVSPSTVSRVISNHSGISSETKKKVQKVMDEIGYTPNLSARYLVTKQTKTILLVLKTASIEMRQNPFFTDVLISVSKVCKGNGYSTITTTSIDEQALFKEVKNYIDSRMIDGVILLYSKQDKVTDYLKAKSFPFVVIGKALDDNYPVMYIDNDNVKASEQLTEYMVDLGHKNLLFIREQGDYEVSKDRELGFINVCRKHGIDYEVLEGTLELKEAQSILKEINIERFSGLITSDSMMNLLVLNILYQMKINVPETIQTATFNDSFLSETACPSQTVVNIYPESLGKVAATNLIELLSDKAFPIYNVIIPTTIIERNSTQMIGARR
Firmicutes	Staphylococcaceae	681	6685	MalR	SA1339	Q7A5G4_STAAN	U	*	Staphylococcus aureus subsp. aureus N315	158879	Maltodextrin utilization, Maltose utilization	Maltose	MVTIKDVALKAGVSPSTVSRVIKGNKRISEATISKVKKVMEELNYFPNTAARTLITNQTYKIGLVLKGSEEPIRLNPFYINVLLGISETCNQHGYGTQTTVSNNMNDLMDEVYKMIKQRMVDAFILLYSKENDPIKQMLIDESMPFIVIGKPTSDIDHQFTHIDNDNILASENLTRHVIEQGVDELIFITEKGNFEVSKDRIQGFETVASQFNLDYQIIETSNEREVILNYMQNLHTRLKDPNIKQAIISLDAMLHLAILSVLYELNIEIPKDVMTATFNDSYLTEIASPPQTCIDIKPRMLGQQAGSAILNILKNKAQDVIELVIIDTELKIRKSTQR
Firmicutes	Staphylococcaceae	681	6689	MalR	SH1407	Q4L6K9_STAHJ	U		Staphylococcus haemolyticus JCSC1435	279808	Maltodextrin utilization, Maltose utilization	Maltose	MSKLGYIPNQAARTLITNKTLTIGLIQKSSAPEIRQNPFNSDVLNGINQACNVRGYSTRMTVSENSGDLYHEVKTMIQSKSVDGFILLYSLKDDPIEHLLNEFKVPYLIVGKSLNYENIIHIDNDNIDAAYQLTQYLYHLGHRHILFLQESGHYAVTEDRSVGFKQYCDDVKISNDCVVIKSMNDLRDFIKQYCIDASHMPSVIITSDVMLNMQLLNVLYEYQLRIPEDIQTATFNTSFLTENATPSQTSVNINPDVLGFTAGNTIIDVLRNETISFREKLISTQIVERVSTTKI
Firmicutes	Staphylococcaceae	681	6690	MalR	SSP1245	Q49XV5_STAS1	U		Staphylococcus saprophyticus subsp. saprophyticus ATCC 15305	342451	Maltodextrin utilization, Maltose utilization	Maltose	MVTIKDIANAANVSPSTVSRVISGNSRISVATQEKVKKIMADFNYQPNHAARTLITKKSKTIGIIQKQGDKATRQNPFIIEVLSGVYIECKYHDYATISTTGEQTSEIIAEVKHLIQSHAVEGFILLYSKENDEIANLLKQHAIPYVVIGKPINNENVVHIDNDNILASQLLTRYLIDLGHKTFLFLAEMGDYEVVKDRIKGYKQTLKVANLKPSIMFTDLSRQQIINHLKALVTENALPTIIITSDTMLNQLVLSALYELNITIPEDIQTATFNDSYISAYAAPPQTAVDIQPQLLGKAAGESIIKLVKDSHIEYMNKIIPTHIINRCSTKKF
Firmicutes	Streptococcaceae	3564	34874	MalR	LACR_1846	Q02XI9_LACLS	U		Lactococcus lactis subsp. cremoris SK11	272622	Maltodextrin utilization, Maltose utilization	Maltose	MAVTIKDVAKKAGVNASTVSRVIKDSSEISDKTKVKVRKAMHELGYRRNAAAQILASGKTNTIGVVFPPVADKASQPFFMKILTSINETARDYDVSIAIATGHSVGELKKQVELQLSEKRVDGFIVLYAGKSDEVRDYLLENKVPFVLVGTPTEGKNEITHVDNDNMLLGREAVRLLAQLNHQNISFVTDTKETEVFEERYQGFKDEAERLGLSHDLLFMDSNFSLRNETALVVMDDVLSLKVVERLRSQGLNVPEDVSLVTYNNSIFGAMIHPYLTTFDIHIEQLGASAIKKILDLRDNKENLPEKTIIPFELIVRESTKARI
Firmicutes	Streptococcaceae	3564	34875	MalR	L0144	Q9CF05_LACLA	U		Lactococcus lactis subsp. lactis Il1403	272623	Maltodextrin utilization, Maltose utilization	Maltose	MAVTIKDVAKKAGVNASTVSRVIKDSSEISDKTKVKVRKAMHELGYRRNAAAQILASGKTNTIGVVFPPVADKASQPFFMKILTSINETARDYDVSIAIATGHSAKELKKQIELQYSEKRVDGFIVLYAGKNDEVRDYLLENKVPFVLVGTPAEGKNEITHVDNDNMLLGREAVRHLAQLKHQNISFVTDTKETEVFEERYQGFKDESEKLGLNHDLLFMDANFSLRNETALVVMDDVLSLKVVERLRSQGLNVPEDVSLITYNNSIFGAMIHPYLTTFDIHIEQLGASAIKKILDLRDKKENLPEKSIIPFELIIRESTKARI
Firmicutes	Streptococcaceae	3564	34876	MalR	SAG1440	Q8DYN5_STRA5	U		Streptococcus agalactiae 2603V/R	208435	Maltodextrin utilization, Maltose utilization	Maltose	MVTIKDVAAKAGVNPSTVSRVLKDNASISSKTKERVKKAMEELGYVPNVAAQMLASGLTQNIGVIFPPLVLPDRLSEPFFMEILSTLTNEAKEHEFTVSIATSMSSEELLEQVKLMHLQKRVDGFIVLYSDQKDPIREYLLKYKLPFVVVGAANGYENEITYIDNDNQLMGKSAIDYLYKKGHKSIQFVTDDLNSEVSEERYLGYFKGARKLGLNQKPALLFDRGNPQVLEEFINRVKEEETTALIVIGDTVSVRVMQFLSFYKLKVPDDISIMTFNNSLFSHLIHPYLSTFDINVNNLGRTSVRRLIDIIKSPDKVFSETIIVPFTLEERESVRDISKNNN
Firmicutes	Streptococcaceae	3564	34877	MalR	SDEG_0221	C5WEC3_STRDG	U		Streptococcus dysgalactiae subsp. equisimilis GGS_124	486410	Maltodextrin utilization, Maltose utilization	Maltose	MREEDLVTIKDVAKLAGVSASTASRAINDNHMISQATKERVRKAMEALDYSPNYSAQNLVKRQSNAVGIILPVRVIQDSLGNNPFFMQIIQGIAGVCTDNGYMVSLATGRSDDELLKNVQNMIRSGHIGKLIFLYSKTDDKVFDFVKKQAVDCVVVGQSYATDNGNAKFVDNDNRQAGYDAAAFLLERGFKQITYAYTDMDELVQAERFIGYAEKMTSQGLTAQTINLSSETEQDIGQRIQKFLANHPQPAFVTCDDMLAIHLQRLLKQNHPNPKVPMISFNNSILAELATPSLTSVEIFPYQLGEKAATLVLATDHIQDTIHLISHQIVERESTQPITP
Firmicutes	Streptococcaceae	3564	34877	MalR	SDEG_1294	C5WHC4_STRDG	U		Streptococcus dysgalactiae subsp. equisimilis GGS_124	486410	Maltodextrin utilization, Maltose utilization	Maltose	MVTIKDVAQKAGVNPSTVSRVLKDNRSISQKTKEKVRKAMADLGYVPNVAAQMLASGLTHNIGLVFPPITTSDRLSEPFFMEILSTITNEAKKQHFTVSIATGMSLEDLLGQVKLMHLQKRVDGFIILYSDQEDPVRNYLMTNKIPFVIVGAPEGDANKITYIDNDNQLMAKTAVDHLYQKGHRQILFITDDLVSEVASERYIGYLKGCLKLSLETKPMLLFDRKDPVSVQNVIEGIRDFKATALVVIGDVLSVRMVQLLSFYGIKVPDDVSIITFNNSSYAKLIHPYLTTFDINVDNLGKTSFKQLLDIINSKEQSLSQKIFVPFTLKKRESVRNINE
Firmicutes	Streptococcaceae	3564	34878	MalR	Sez_1784	B4U5A0_STREM	U		Streptococcus equi subsp. zooepidemicus MGCS10565	552526	Maltodextrin utilization, Maltose utilization	Maltose	MVEEGHVVTIKDVARLAGVSPSTASRAINNSDMISQATKRRVKKAMQALDYSPNYSAQNLVKRQSNTVGIILPVREDQDSLGNNPFFMQIIQGIAAVCTDKGYMVGLATGRSAAELLTNVQSMIRSGNIDKLIFLYSKTDDQVFDFVKRQRVDCVVVGQSTTKDPGNAKFVNNNNHQAGYDAAAFLLQKGYEAIVYAYTDMAELVQAERYKGYAELMASKALVAQAFCVTLKDDRKSQKQLLDQLAKRSKVAFVVCDDVLAIHLQRLIKQVAADTQLAIVSFNNSVLAELASPALTSVDIFPYQLGEQAAELVLSSAAPSPQPVLVPHQIIERESTPFIV
Firmicutes	Streptococcaceae	3564	34878	MalR	Sez_1256	B4U3M9_STREM	U		Streptococcus equi subsp. zooepidemicus MGCS10565	552526	Maltodextrin utilization, Maltose utilization	Maltose	MVTIKDVALKAGVNPSTVSRVLKDNRSISQKTKEKVRRAMSELGYVPNVAAQMLASGLTHNIGLVFPPIITNDRLSDPFFMEILSTITNEAKKHHFTVSIATGMSVEDLLSQVKLMHLQKRVDGFIILYSEQEDPVRGYLMTNQIPFVIVGAPEGDENKITYIDNDNQLMAKTAVDHLYQKGHRQILFITDDMEAEVASERYIGYLKGCLKLSLENKPMLLFDRKDPISIEKVIETIRSFKATALIVIGDVLSVRMVQLLSFYDIKVPDDISIITFNNSSYSKLIHPYLTTFDINVENLGRTSFRQLLDIINANEQTLSQKILVPFSLKKRESVRDINAK
Firmicutes	Streptococcaceae	3564	34879	MalR	GALLO_0148	D3HI60_STRG3	U		Streptococcus gallolyticus UCN34	637909	Maltodextrin utilization, Maltose utilization	Maltose	MATIKDVARVAGVSTSTASRALHDSSMISEATKRRVRRAMKELDYSPNYSAQNLVNRTTNTIGIILPVRESQDSLGNNPFFMQIIQGISSVCSENDYMVSLATGRTDDELQKNIQTLIRSGNITKLIFLYSRKADPVFEFVKQEKKVSCVVVGRSYENAPQKTVRFVDNNNDQAGKDATTFMLAKGYNHLVFAYTDMDELVQTERYQGYCEALQEYGKKGSTLQLSRLSDEENAVKLQTFLAENPKTEAFVACDDIMAIRLQRLFKDSDLENHYAMIGFNNSLITEIASPALTSVDIFPYELGENAAKLLLADPKNLTEQTVVIPHKIIERESTPDLG
Firmicutes	Streptococcaceae	3564	34879	MalR	GALLO_1398	D3HEC8_STRG3	U		Streptococcus gallolyticus UCN34	637909	Maltodextrin utilization, Maltose utilization	Maltose	MVTIKDVAAKAGVNPSTVSRVLKDNKSISQKTKDKVRKAMAELGYVPNVAAQMLASGLTYNVGLIFPPLMTPDRLNEPFFMQILSTITSEAKLNDFTVSIATGMTVDELEEQVKLMYRQKRVDGFIILYSDPDDPVRKYLMDNDVPFVIVGAPEGFENDITYIDNDNQLMGKKAVEYLYQKGHREILFVTDDLKSEVSSERYFGYLRGMEKLELDSNPALLFDRRDPMVLEELIQKIEESKATALIVIADTISVRITQFLSYYQLSVPDDISIITFNNSAYSTLVHPYLTTFDINVSNLGRTSFRRLVELIKSPKTAITEKIIVPFTLRERESVRQLHVND
Firmicutes	Streptococcaceae	3564	34880	MalR	SGO_0100	A8AUG2_STRGC	U		Streptococcus gordonii str. Challis substr. CH1	467705	Maltodextrin utilization, Maltose utilization	Maltose	MPVTIKDVAKLAEVSPSTVTRVIQNKSTISDETKKRVRKAMKELNYHPNLNARSLVSSYTQVIGLVLPDDSDAFYQNPFFPSVLRGISQVASQHQYAIQIATGKDEKERMTAISQMVHGRRVDGLIFLYAEENDPLVRMAYEEQFPFLILGKSLSPFIPLVDNDNIQAGFDATEYFIKKGCRHIAFIGGTKKLFVTQDRYTGYENALKEHQLELDPQSTAFVTEFLEEKGYQFTKRLLAKNPNIDAIITTDSLLASGVCDFLSSQNLTIPVLSFDSVDPKLDLAAYVDINTLELGRVSFQTILQIINDTKENRKICYRQLISHKIIER
Firmicutes	Streptococcaceae	3564	34881	MalR	smi_0129	D3H6E0_STRM6	U		Streptococcus mitis B6	365659	Maltodextrin utilization, Maltose utilization	Maltose	MPVTIKDVAKAAGVSPSTVTRVIQNKSTISDETKKRVRKAMKELNYHPNLNARSLVSSYTQVIGLVLPDDSDAFYQNPFFPSVLRGIAQVASENHYAIQIATGKDEKERLKAISQMVYGKRVDGLIFLYAEEEDPLVKLVADEQFPFLILGKSISPFIPLVDNDNVQAGFDATEYFIKKGCKRIAFIGGTKRLFVTQDRLTGYESALKQYQLPLDNNLTYFANEFLEEKGYQFSKRLFKHDPMIDAIITTDSLLAEGVCDYIAKHQLDVPVLSFDSVNPKLNLAAYVDINSLELGRVSLETILQIINDAKSNKQICYRQLIAHKIIEK
Firmicutes	Streptococcaceae	3564	34882	MalR	SMU.1566	Q8DT29_STRMU	U		Streptococcus mutans UA159	210007	Maltodextrin utilization, Maltose utilization	Maltose	MVTIKDVAKEAGVNPSTVSRVLKNSSSISQKTKDRVQQAMTDLGYVPNLAAQMLASGLTHCVGVVFPPLTSPDRLSEPFFMEILAAINNEASRNKFTVSIATSNTLTDLKDQVQLMYRQGRVDGFIVLYSERRDPVRQYLIKNKIPFVIVGAPVDYKDETTYVDNDNQLMAETAVTYLNQKGHKQILFVTNDQESDVYIERFIGYQKGMQALGLQSYDSALFDSKQASTLEAFIKTVQKKKITALLIIGDVVSLRIIQFLSYYGIAVPEDMSIVSFNNSSYATILHPYLTTFDINVNRLGRASLNCLLEKVQKRQSKDQKVIVPFTLKKRESVRNLKKS
Firmicutes	Streptococcaceae	3564	34883	MalR	SP_2112	MALR_STRPN	R	*	Streptococcus pneumoniae TIGR4	170187	Maltodextrin utilization, Maltose utilization	Maltose	MPVTIKDVAKAAGVSPSTVTRVIQNKSTISDETKKRVRKAMKELNYHPNLNARSLVSSYTQVIGLVLPDDSDAFYQNPFFPSVLRGISQVASENHYAIQIATGKDEKERLNAISQMVYGKRVDGLIFLYAQEEDPLVKLVAEEQFPFLILGKSLSPFIPLVDNDNVQAGFDATEYFIKKGCKRIAFIGGSKKLFVTKDRLTGYEQALKHYKLTTDNNRIYFADEFLEEKGYKFSKRLFKHDPQIDAIITTDSLLAEGVCNYIAKHQLDVPVLSFDSVNPKLNLAAYVDINSLELGRVSLETILQIINDNKNNKQICYRQLIAHKIIEK
Firmicutes	Streptococcaceae	3564	34884	MalR	SPy1293	Q99ZC1_STRP1	U		Streptococcus pyogenes M1 GAS	160490	Maltodextrin utilization, Maltose utilization	Maltose	MVTIKDVAQKAGVNPSTVSRVLKDNRSISMKTKEKVRKAMADLGYVPNVAAQILASGLTHNIGLVFPPITTSDRLSEPFFMEILSTITNEAKESHFTVSIATGISLDDLIEQVKLMHLQKRVDGFIILYSDQDDPVKKYLMTNNLPFVIVGAPQGDTNKTTYIDNDNQLMAKTAVEHLYQKGHHNILFITDDLLSEVTSERYLGYLKGCFKRSLKTKPMLLFDRKDPVSVEILMETISSFKATALVVVGDVLAIRMVQLLSFYDIKVPDDMSIITFNNSNYAKLIHPYLTTFDINVENLGKMSFKQLLDIINSNEQNLSQTIFVPFSLKQRESVRDISH
Firmicutes	Streptococcaceae	3564	34885	MalR	SSA_2267	A3CR24_STRSV	U		Streptococcus sanguinis SK36	388919	Maltodextrin utilization, Maltose utilization	Maltose	MRVTIKEVAKLAGVSPSTVTRVVQNKSTISEETKKRVRAAMKELDYHPNLNARSLVSQSSQVIGLVLPDDSDVFYQNPFFPTVLRGISQIASDYDYAIQISTGQDEEHRLENLKQMILGKRVDGLIFLYSKQDDPLVDFAVRNNFPFLILGKAVSPFISLVDNDNIKAGYDATRYFLDKGYQKIAFLAGNKELVVSQDRYTGYKQALNEAERPLDERIIKFAFGFLLEDNSYKIMEELPLDEIEAIVTSDTLVAEGALHYLKDQDYQIPIITFDSLKPRIDVDAYIDINALELGKESFRTLFQIIKDNKEDKQICYRQLIPHSISTR
Firmicutes	Streptococcaceae	3564	34886	MalR	SSU05_2137	A4VYB4_STRSY	U		Streptococcus suis 05ZYH33	391295	Maltodextrin utilization, Maltose utilization	Maltose	MRATIKDVAKLAGVSPSTVTRVIQNSSAISQKTKDLVRKAMADLNYHPNLNARSLVSSYTQVIGLVLPDDSDVFYQNPFFPTALRGISQVAADHNYAIQISTGKNEEQRLEAISQMVYGKRVDGLIFLYSKPDDPLVQLAIQHKFPFLILGKADSPFISLVDNDNIQAGFEATNYFINKGYKNIAFVAGNKELVVSQDRYTGYKNALKSHNIPLDENKVKFVSGFLLEDSAYKISKKLLKQDLDAIVTTDTSVAEGVVKYLNEVGVKLPIISFDSVKPKLDIEAYVDVHAIKLGRVAFNTLHQIINDNKEDKQVCYRRVIPHTITEL
Firmicutes	Streptococcaceae	3564	34887	MalR	str1014	Q5LZT3_STRT1	U		Streptococcus thermophilus CNRZ1066	299768	Maltodextrin utilization, Maltose utilization	Maltose	MMATIKDVARRDGVIPSTVSRTLKDNPSISKETKAKVRAAMDELGYVPNSAAQMLATGLTHSLGFVLPPLTDRENISQPFYMEIITAINEEASSNSQVVSIATDALLEELVKQVELMYRQKRADGFIILYSETNDPVKDYLLKEKVPFVVVGAAVDNNDKVTYIDNDNKELGQEAVNFLRAKGHQKIGFVTDDLFGQVGQEHYQGYIEATNEFNLETYPELVFSSRVIDSLIESLQSYQLTALIVKDDLIALRFIHWLNNQGIRIPEDYAIISFNNSIFAEIMHPFLTTYDINIKELGKESVQRLLDLLKNPQTKAQKITIPFRLIERESVSMG
[truncated: 656 more rows]

## Sheet: Duplicated TFs
regulogId1	Regulog	TF locus tag	vimssId	regulonId	taxonId	Taxonomic collection	Genome	Phylum	Regulated metabolic pathway	TF effector
1132	AscG	ECA2164	606553	10321	218491	Enterobacteriales	Erwinia carotovora subsp. atroseptica SCRI1043	Proteobacteria/Gamma	Beta-glucosides utilization, Cellobiose utilization	Beta-glucoside-6-phosphate, Cellobiose-6-phosphate
[truncated: 58 more rows]
